# Supplementary material for: Luminescent cyclometalated gold(iii) complexes covalently linked to metal–organic frameworks for heterogeneous photocatalysis
Source: PubMed Central journal article supplement — Chem Sci. 2024 Dec 23;16(5):2202–14. doi: 10.1039/d4sc06058j (PMC11712214; doi:10.1039/d4sc06058j), 2024-12-23

# Luminescent Cyclometalated Gold(III) Complexes Covalently Linked to Metal-Organic Frameworks for Heterogeneous Photocatalysis

Jian-Rui Chen<sup>†</sup>, Dongling Zhou<sup>†</sup>, Yungen Liu, Mian Li, Yonghong Xiao,  
Xiao-Chun Huang\*, and Chi-Ming Che\*

## Supplementary Information – Table of Contents

|     |                                                                                                                                                                            |    |
|-----|----------------------------------------------------------------------------------------------------------------------------------------------------------------------------|----|
| 1   | General information .....                                                                                                                                                  | 1  |
| 1.1 | Materials and methods.....                                                                                                                                                 | 1  |
| 1.2 | Photoreactor setup .....                                                                                                                                                   | 2  |
| 1.3 | LED spectral analysis .....                                                                                                                                                | 2  |
| 2   | Synthesis and Characterization of H <sub>2</sub> TPDC and H <sub>2</sub> TPDC-[Au1/Au2] .....                                                                              | 3  |
| 3   | Synthesis and Characterization of UiO-68-Me and UiO-68[Au1/Au2] .....                                                                                                      | 7  |
| 3.1 | Synthesis of UiO-68-Me .....                                                                                                                                               | 7  |
| 3.2 | Synthesis of UiO-68[Au1/Au2] .....                                                                                                                                         | 7  |
| 3.3 | SEM and EDS mapping of UiO-68-Me and UiO-68[Au1/Au2].....                                                                                                                  | 9  |
| 3.4 | XPS analysis of Au(C <sup>N</sup> C)Cl, Au(C <sub>np</sub> <sup>N</sup> C <sub>np</sub> )Cl, UiO-68[Au1/Au2], and UiO-68[Au1] after treatment with NaBH <sub>4</sub> ..... | 12 |
| 3.5 | ICP-MS results of UiO-68[Au1/Au2] .....                                                                                                                                    | 14 |
| 3.6 | Digestion experiment .....                                                                                                                                                 | 14 |
| 3.7 | PXRD patterns of UiO-68[Au1] treated under different conditions.....                                                                                                       | 15 |
| 3.8 | PXRD patterns and TGA curves of UiO-68-Me and UiO-68[Au1/Au2].....                                                                                                         | 16 |
| 3.9 | BET surface area and pore volume of UiO-68-Me and UiO-68[Au1/Au2].....                                                                                                     | 18 |
| 4   | Synthesis and characterization of substrates.....                                                                                                                          | 21 |
| 4.1 | General procedure A for preparing diallyl ethers and <i>N</i> -tosylamides.....                                                                                            | 21 |
| 4.2 | General procedure B for preparing oxime.....                                                                                                                               | 23 |
| 4.3 | Synthesis of <i>tert</i> -butyl 2-(2-(cinnamyloxy)ethylidene)hydrazine-1-carboxylate (3f).....                                                                             | 25 |
| 4.4 | General procedure C for preparing halogenated alkyl malonates .....                                                                                                        | 26 |
| 4.5 | General procedure D for preparing halogenated alkyl <i>N</i> -tosylamides .....                                                                                            | 27 |
| 5   | Activity and stability of UiO-68[Au1] for the photo-induced [2+2] cycloaddition reaction of styrene (1a) .....                                                             | 28 |
| 6   | General procedure E for visible-light-driven [2+2] styrene cycloaddition.....                                                                                              | 31 |
| 7   | General procedure F for visible-light-driven [2+2] cycloaddition between imines and alkenes.....                                                                           | 34 |
| 8   | General procedure G for the crossed [2+2] photocycloaddition reaction of two alkenes .....                                                                                 | 36 |
| 9   | General procedure H for UiO-68[Au1]-catalyzed singlet oxygen-sensitized oxidation .....                                                                                    |    |

|                                                                                                   |    |
|---------------------------------------------------------------------------------------------------|----|
| reaction.....                                                                                     | 44 |
| 9.1 Visible-light-driven oxidation of sulfides ( <b>8a</b> ).....                                 | 44 |
| 9.2 Visible-light-driven oxidation of dibenzylamine ( <b>8b</b> ).....                            | 44 |
| 9.3 Visible-light-driven cross-dehydrogenative coupling reactions.....                            | 45 |
| 9.3.1 Control experiment.....                                                                     | 47 |
| 9.3.2 Cycle experiment.....                                                                       | 47 |
| 10 General procedure I for visible-light-promoted reductive cyclization of alkyl halides<br>..... | 48 |
| 10.1 Control experiment.....                                                                      | 49 |
| Reference .....                                                                                   | 54 |
| Single crystal data.....                                                                          | 55 |
| NMR spectra .....                                                                                 | 59 |

# 1 General information

## 1.1 Materials and methods

All reagents and solvents used for synthesis were purchased from commercial sources and used without further purification unless otherwise stated.  $[\text{Au}(\text{C}^{\wedge}\text{N}^{\wedge}\text{C})\text{Cl}]$ ,<sup>1</sup>  $[\text{Au}(\text{C}_{\text{np}}^{\wedge}\text{N}^{\wedge}\text{C}_{\text{np}})\text{Cl}]$ <sup>2</sup> and  $[\text{Au}(\text{C}^{\wedge}\text{N}^{\wedge}\text{C})\text{NHC}]\text{PF}_6$ <sup>3</sup> were synthesized according to reported methods. Me-TPDC-[Au1] crystals suitable for X-ray diffraction analysis were obtained by slowly diffusing Et<sub>2</sub>O into the MeCN solution of the complex. Powder X-ray diffraction (PXRD) data were collected on a Rigaku MiniFlex600 diffractometer using Cu K $\alpha$  radiation. The PXRD pattern was scanned over 4–30° ( $2\theta$ ) at a scan speed of 10°/min and a step width of 0.02°. 77 K-N<sub>2</sub> sorption isotherms were measured with a Micromeritics ASAP 2020 instrument. Prior to the sorption experiments, the samples were activated under a high vacuum at 100 °C for 6 h to remove guest molecules. The pore size distribution was derived from the N<sub>2</sub> isotherms at 77 K and analyzed by nonlocal density functional theory (NLDFT). Thermogravimetric analysis (TGA) was performed using a TA Q50 apparatus under a nitrogen atmosphere. Single crystal X-ray diffraction (SC-XRD) data were collected using a Bruker D8 VENTURE diffractometer equipped with an Excillum METALJET diffractometer using Ga K $\alpha$  radiation ( $\lambda = 1.34139$ ). Analysis of scanning electron microscope (SEM) and EDS mapping was conducted using a Zeiss Gemini 300 field emission scanning electron microscope (FE-SEM). The molar concentrations of Zr and Au were determined using an Agilent 7700 inductively coupled plasma mass spectrometer (ICP-MS). Nuclear magnetic resonance (NMR) spectra were measured on a Bruker DPX-600, DPX-500 or DPX-400 spectrometer. Chemical shifts were determined with tetramethylsilane (TMS) as an internal reference or with reference to the residual signal of a non-deuterated solvent. Coupling constants ( $J$ ) were reported in Hertz (Hz). The following abbreviations were used to explain the multiplicities: s = singlet, d = doublet, t = triplet, q = quartet, p = pentet, m = multiplet, br = broad. X-ray photoelectron spectroscopy (XPS) was carried out on a PHI 5000 Versa Probe III supplied by ULVAC-PHI Inc., Japan equipped with a monochromatic Al K $\alpha$  radiation source. Mass spectrometry measurements were performed using a Bruker Autoflex Speed MALDI TOF/TOF mass spectrometer equipped with a 355 nm solid-state smartbeam Nd:YAG laser. High-resolution mass spectra were recorded using a Q Exactive mass spectrometer (Thermo S3 Fisher Scientific, USA). Steady-state emission spectra were obtained on a Horiba Fluorolog-3 spectrophotometer. Emission quantum yields ( $\Phi$ ) were measured using a Hamamatsu C11347 Quantaaurus-QY Absolute PL quantum yields measurement system. For absorption and emission measurements, the concentration of the solution is  $2 \times 10^{-5}$  mol dm<sup>-3</sup>. Solutions for photophysical studies were degassed using a high vacuum line in a two-compartment cell and subjected to five freeze-pump-thaw cycles to remove oxygen. Absorption spectra were recorded on a Hewlett-Packard 8453 diode array spectrophotometer at room temperature. Irradiation was performed using 410 nm LEDs

(3 W × 4) illumination instruments.

## 1.2 Photoreactor setup

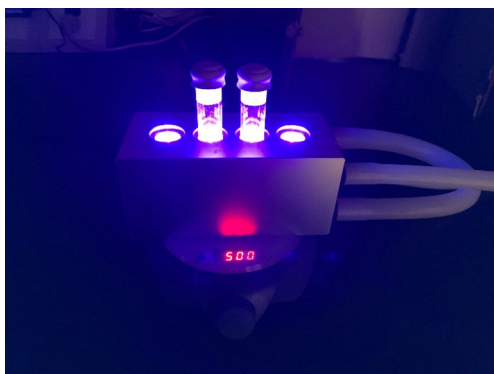

The setup used for photocatalytic studies (the reactor is cooled by running water).

## 1.3 LED spectral analysis

|                                                     |                                            |                                     |                |
|-----------------------------------------------------|--------------------------------------------|-------------------------------------|----------------|
| Test project:                                       | LED spectral analysis                      |                                     |                |
| Test equipment:                                     | HOPOOCOLOR OHSP-250UV                      |                                     |                |
| The test identification                             | Product model: 3 W LED                     |                                     |                |
|                                                     | Ambient temperature: 20 °C                 | Ambient humidity: 65%               |                |
|                                                     | Test organization: Spectro test department |                                     |                |
| Spectral relative energy distribution curve         |                                            |                                     |                |
|                                                     |                                            |                                     |                |
| Spectrum parameter                                  |                                            |                                     |                |
| Peak wavelength                                     | 404.5 nm                                   | Chromaticity coordinate (x, y)      | 0.1718, 0.0132 |
| Main wavelength                                     | 430.5 nm                                   | Chromaticity coordinate (u, v)      | 0.2442, 0.0281 |
| Centroid wavelength                                 | 434.3 nm                                   | Color temperature                   | 100000 K       |
| Central wavelength                                  | 406.2 nm                                   | Color purity                        | 98.1%          |
| Half-wave width                                     | 19.7 nm                                    | Irradiance Ee (mW/cm <sup>2</sup> ) | 55.145         |
| Luminous flux chromatography (RGB): 4.3, 45.2, 50.4 |                                            |                                     |                |

## 2 Synthesis and Characterization of H<sub>2</sub>TPDC and H<sub>2</sub>TPDC-

### [Au1/Au2]

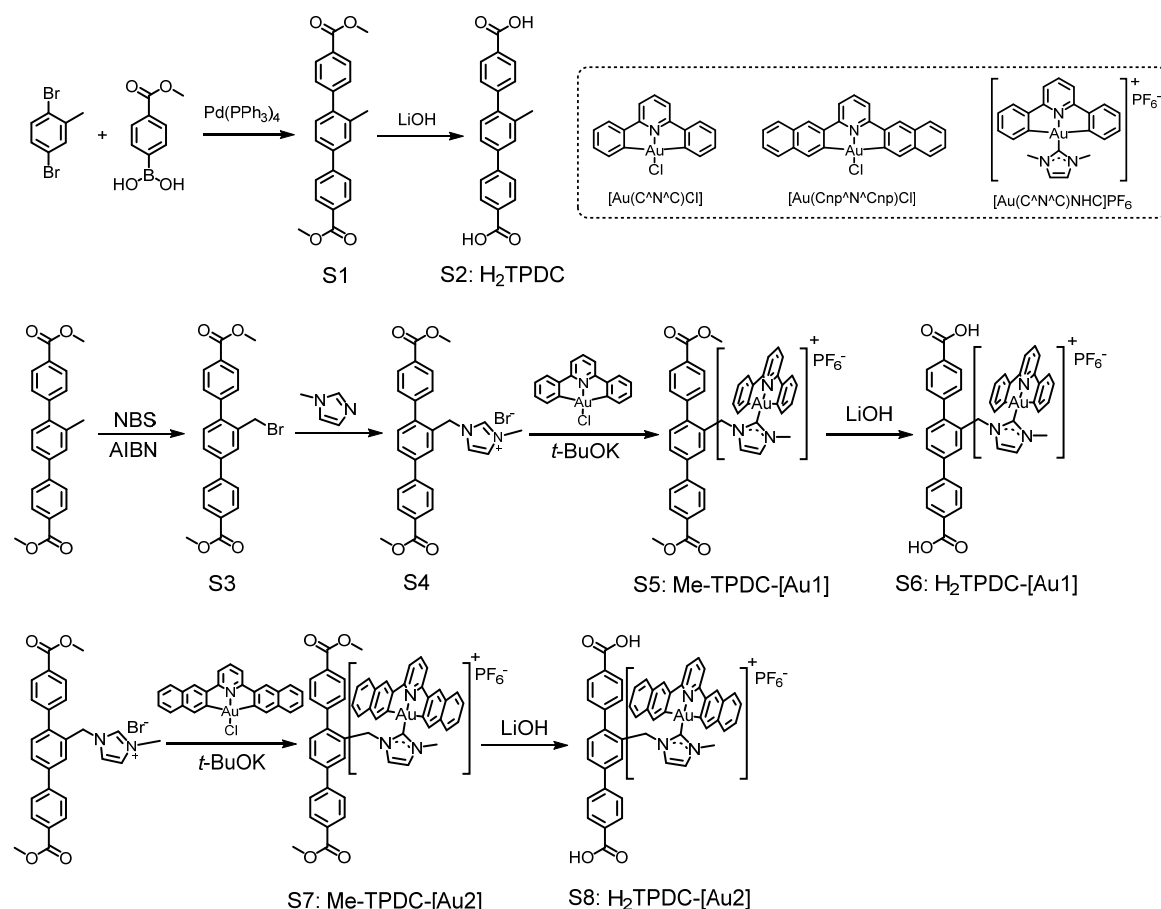

**Scheme S1.** Gold(III) complexes studied in this work and synthetic routes of organic linker H<sub>2</sub>TPDC and H<sub>2</sub>TPDC-[Au1/Au2].

### Synthesis of S1

A mixture of 2,5-dibromotoluene (4.99 g, 20 mmol), 4-(methoxycarbonyl)benzeneboronic acid (7.92 g, 44 mmol), K<sub>2</sub>CO<sub>3</sub> (5.53 g, 40 mmol) and Pd(PPh<sub>3</sub>)<sub>4</sub> (5 mol%) in H<sub>2</sub>O/1,4-dioxane (100 mL, 1/4) was refluxed at 90 °C under argon. The reaction progress was monitored by thin-layer chromatography (TLC). After the reaction, the mixture was extracted with CH<sub>2</sub>Cl<sub>2</sub>. The combined organic phases were washed with H<sub>2</sub>O, dried over MgSO<sub>4</sub>, filtered, and concentrated. Further purification by column chromatography on silica gel (DCM/PE = 1: 2 v/v as eluent) to afford **S1** as a white solid (yield 85%). <sup>1</sup>H NMR (500 MHz, CDCl<sub>3</sub>) δ 8.13 (d, *J* = 5.2 Hz, 2H), 8.11 (d, *J* = 4.7 Hz, 2H), 7.70 (d, *J* = 7.9 Hz, 2H), 7.58 – 7.50 (m, 2H), 7.44 (d, *J* = 7.9 Hz, 2H), 7.33 (d, *J* = 7.9 Hz, 1H), 3.95 (s, 3H), 3.95 (s, 3H), 2.35 (s, 3H). <sup>13</sup>C NMR (126 MHz, CDCl<sub>3</sub>) δ 167.00, 146.11, 145.12, 140.76, 139.49, 135.89, 130.23, 130.15, 129.53, 129.41, 129.25, 129.00, 128.82, 127.26, 127.00, 124.82, 52.20, 52.18, 20.61. HRMS (ESI, *m/z*): Calcd for [C<sub>23</sub>H<sub>20</sub>O<sub>4</sub> + Na]<sup>+</sup>: 383.1254, found: 383.1247.

### Synthesis of S2

A mixture of **S1** (2.84 g, 7.8 mmol) and LiOH·H<sub>2</sub>O (1.39 g, 31 mmol) in a mixed solvent system containing THF (75 mL) and H<sub>2</sub>O (75 mL) was stirred at 65 °C for 12 h. After removing THF, the resulting aqueous solution was acidified with a dilute aqueous HCl solution (pH = 2 to 3). The precipitate was washed with H<sub>2</sub>O and dried under vacuum, affording **S2** as a white solid (yield: 88%). <sup>1</sup>H NMR (600 MHz, DMSO-*d*<sub>6</sub>) δ 13.00 (brs, 2H), 8.09 – 8.02 (m, 4H), 7.86 (d, *J* = 8.3 Hz, 2H), 7.72 (d, *J* = 1.9 Hz, 1H), 7.65 (dd, *J* = 7.9, 1.9 Hz, 1H), 7.53 (d, *J* = 8.2 Hz, 2H), 7.36 (d, *J* = 7.9 Hz, 1H), 2.34 (s, 3H). <sup>13</sup>C NMR (151 MHz, DMSO-*d*<sub>6</sub>) δ 167.62, 167.60, 145.63, 144.27, 140.71, 138.89, 136.06, 130.63, 130.43, 130.15, 129.92, 129.77, 129.68, 129.54, 127.21, 125.06, 20.70. HRMS (ESI, *m/z*): Calcd for [C<sub>21</sub>H<sub>16</sub>O<sub>4</sub> + Na]<sup>+</sup>: 355.0941, found: 355.0937.

### Synthesis of S3

A mixture of **S1** (2.09 g, 5.8 mmol), NBS (1.14 g, 6.4 mmol), AIBN (99 mg, 0.6 mmol) in CCl<sub>4</sub> (100 mL) was refluxed for 3 h (the reaction progress was monitored by TLC). After the reaction, the insoluble substance was filtered out and the reaction solution was evaporated under reduced pressure to give an off-white solid crude product. The crude product was purified by column chromatography on silica gel (DCM/PE = 1:20 v/v as eluent) to afford **S3** as a white solid (yield 67%). <sup>1</sup>H NMR (500 MHz, CDCl<sub>3</sub>) δ 8.16 (d, *J* = 6.6 Hz, 2H), 8.14 (d, *J* = 6.7 Hz, 2H), 7.80 (d, *J* = 1.9 Hz, 1H), 7.72 (d, *J* = 8.4 Hz, 2H), 7.64 (dd, *J* = 8.0, 1.9 Hz, 1H), 7.58 (d, *J* = 8.3 Hz, 2H), 7.37 (d, *J* = 7.9 Hz, 1H), 4.49 (s, 2H), 3.97 (s, 3H), 3.96 (s, 3H). <sup>13</sup>C NMR (101 MHz, CDCl<sub>3</sub>) δ 166.85, 144.36, 144.29, 140.76, 140.32, 135.84, 130.90, 130.25, 129.90, 129.74, 129.50, 129.39, 129.09, 127.49, 127.03, 52.28, 52.24, 31.53. HRMS (ESI, *m/z*): Calcd for [C<sub>23</sub>H<sub>19</sub>O<sub>4</sub>Br + Na]<sup>+</sup>: 461.0359, found: 461.0356.

### Synthesis of S4

*N*-Methylimidazole (0.21 g, 2.5 mmol) was added dropwise to a MeCN (60 mL) solution of **S3** (1.01 g, 2.3 mmol). The resulting mixture was stirred at 85 °C for 12 h (the reaction progress was monitored by TLC). After removing solvents, the crude product was purified by column chromatography on silica gel (MeOH/DCM = 1: 2 v/v) to afford **S4** as a white solid (yield 88%). <sup>1</sup>H NMR (500 MHz, CDCl<sub>3</sub>) δ 10.14 (s, 1H), 8.13 (d, *J* = 8.2 Hz, 2H), 8.10 (d, *J* = 8.4 Hz, 2H), 7.99 (d, *J* = 1.9 Hz, 1H), 7.78 (d, *J* = 8.4 Hz, 2H), 7.72 (dd, *J* = 8.0, 1.9 Hz, 1H), 7.39 (d, *J* = 8.1 Hz, 3H), 7.26 (t, *J* = 1.8 Hz, 1H), 6.71 (t, *J* = 1.8 Hz, 1H), 5.73 (s, 2H), 3.96 (s, 3H), 3.92 (s, 6H). <sup>13</sup>C NMR (126 MHz, CDCl<sub>3</sub>) δ 166.82, 166.50, 143.58, 143.46, 140.85, 140.78, 137.91, 131.21, 131.16, 130.29, 130.21, 129.94, 129.55, 129.36, 129.08, 128.36, 127.23, 123.14, 121.39, 52.44, 52.22, 51.07, 36.72. MS (MALDI-TOF): Calcd for C<sub>27</sub>H<sub>25</sub>N<sub>2</sub>O<sub>4</sub>: 441.51, found: 441.31.

### Synthesis of S5

A mixture of **S4** (0.59 g, 1.15 mmol) and potassium *tert*-butoxide (0.238 g, 2 mmol) in MeOH (200 mL) was refluxed for 30 min, and then [Au(C<sup>^</sup>N<sup>^</sup>C)Cl] (0.69 g, 1.5 mmol) was added to give a pale yellow suspension. The resulting mixture was refluxed for another 12 h. After filtering out the insoluble substances, the filtrate was concentrated and subjected to a metathesis reaction with a saturated NH<sub>4</sub>PF<sub>6</sub> solution in methanol to give a yellow solid. The crude product was collected by filtration and washed with

diethyl ether. Recrystallization from slow diffusion of diethyl ether vapor into a concentrated MeCN solution gave **S5** as a yellow crystalline solid (yield 58%). <sup>1</sup>H NMR (400 MHz, CDCl<sub>3</sub>) δ 7.98 – 7.88 (m, 3H), 7.78 (d, *J* = 8.2 Hz, 2H), 7.54 (d, *J* = 1.9 Hz, 1H), 7.50 (dd, *J* = 7.8, 1.2 Hz, 2H), 7.44 (d, *J* = 8.1 Hz, 2H), 7.36 – 7.30 (m, 3H), 7.28 – 7.23 (m, 1H), 7.22 – 7.14 (m, 3H), 7.13 – 7.03 (m, 4H), 7.00 (d, *J* = 8.0 Hz, 1H), 6.55 (dd, *J* = 7.3, 1.2 Hz, 2H), 5.48 (s, 2H), 3.92 (s, 6H), 3.68 (s, 3H). <sup>13</sup>C NMR (101 MHz, CDCl<sub>3</sub>) δ 166.79, 166.36, 164.03, 162.82, 153.16, 148.73, 143.96, 142.97, 142.93, 140.32, 139.45, 135.13, 132.96, 132.50, 131.02, 130.14, 129.79, 129.41, 129.36, 129.07, 128.20, 127.85, 127.24, 126.39, 126.24, 124.62, 123.59, 117.81, 53.51, 52.44, 52.29, 38.63. MS (MALDI-TOF): Calcd. for [C<sub>44</sub>H<sub>35</sub>AuN<sub>3</sub>O<sub>4</sub>]<sup>+</sup>: 866.24, found: 866.10.

### Synthesis of S6

The procedure was similar to that of **S2** except that **S5** was used instead of **S1** (yield 92%). <sup>1</sup>H NMR (600 MHz, K<sub>3</sub>PO<sub>4</sub>/D<sub>2</sub>O/DMSO-*d*<sub>6</sub>) δ 7.92 (t, *J* = 8.0 Hz, 1H), 7.78 (dd, *J* = 7.9, 4.9 Hz, 4H), 7.74 (d, *J* = 7.7 Hz, 2H), 7.63 (d, *J* = 8.1 Hz, 2H), 7.57 (d, *J* = 1.9 Hz, 1H), 7.40 (d, *J* = 2.1 Hz, 1H), 7.33 (td, *J* = 7.5, 1.3 Hz, 2H), 7.29 – 7.18 (m, 5H), 7.18 – 7.13 (m, 3H), 7.00 (d, *J* = 7.9 Hz, 1H), 6.66 (d, *J* = 7.2 Hz, 2H), 5.48 (s, 2H), 3.65 (s, 3H). <sup>13</sup>C NMR (151 MHz, K<sub>3</sub>PO<sub>4</sub>/D<sub>2</sub>O/DMSO-*d*<sub>6</sub>) δ 174.16, 173.85, 165.49, 164.83, 154.87, 151.46, 146.76, 142.93, 142.51, 141.78, 140.99, 139.84, 137.39, 136.09, 134.42, 133.53, 132.19, 131.86, 130.55, 130.41, 130.33, 128.98, 127.64, 127.15, 125.16, 120.78, 55.16, 41.45. MS (MALDI-TOF): Calcd. for [C<sub>42</sub>H<sub>32</sub>AuN<sub>3</sub>O<sub>4</sub>]<sup>+</sup>: 838.20, found: 838.11.

### Synthesis of S7

The procedure was similar to that of **S5** except that [Au(C<sub>np</sub><sup>^</sup>N<sup>^</sup>C<sub>np</sub>)Cl] was used instead of [Au(C<sup>^</sup>N<sup>^</sup>C)Cl] (yield 53%). <sup>1</sup>H NMR (400 MHz, MeCN-*d*<sub>3</sub>) δ 8.26 (s, 2H), 8.13 (t, *J* = 8.0 Hz, 1H), 7.92 – 7.85 (m, 4H), 7.77 (d, *J* = 8.4 Hz, 2H), 7.62 (d, *J* = 1.9 Hz, 1H), 7.56 (d, *J* = 8.3 Hz, 2H), 7.51 – 7.40 (m, 9H), 7.22 (d, *J* = 8.4 Hz, 2H), 7.11 (s, 2H), 7.06 – 6.98 (m, 3H), 6.83 (d, *J* = 8.0 Hz, 1H), 5.52 (s, 2H), 3.94 (s, 3H), 3.87 (s, 3H), 3.73 (s, 3H). <sup>13</sup>C NMR (101 MHz, MeCN-*d*<sub>3</sub>) δ 166.33, 165.86, 163.17, 157.40, 146.67, 143.40, 142.96, 142.68, 140.27, 138.96, 135.15, 134.47, 133.42, 132.02, 130.50, 129.65, 129.37, 129.19, 129.05, 129.02, 128.41, 128.11, 127.58, 126.65, 126.55, 126.15, 124.90, 123.72, 118.91, 52.19, 51.74, 51.71, 38.40. MS (MALDI-TOF): Calcd. for [C<sub>52</sub>H<sub>39</sub>AuN<sub>3</sub>O<sub>4</sub>]<sup>+</sup>: 966.26, found: 966.02.

### Synthesis of S8

The procedure was similar to that of **S2** except that **S7** was used instead of **S1** (yield 88%). <sup>1</sup>H NMR (600 MHz, K<sub>3</sub>PO<sub>4</sub>/D<sub>2</sub>O/DMSO-*d*<sub>6</sub>) δ 8.55 (s, 2H), 8.11 (d, *J* = 7.7 Hz, 1H), 8.06 (d, *J* = 7.9 Hz, 2H), 7.99 (d, *J* = 7.8 Hz, 2H), 7.81 (d, *J* = 7.7 Hz, 2H), 7.74 (d, *J* = 7.7 Hz, 2H), 7.69 (d, *J* = 7.8 Hz, 2H), 7.66 (s, 1H), 7.59 – 7.53 (m, 5H), 7.33 (s, 1H), 7.16 (s, 2H), 7.11 (d, *J* = 7.8 Hz, 2H), 7.08 (d, *J* = 7.9 Hz, 2H), 6.71 (d, *J* = 7.8 Hz, 1H), 5.60 (s, 2H), 3.77 (s, 3H). <sup>13</sup>C NMR (151 MHz, K<sub>3</sub>PO<sub>4</sub>/D<sub>2</sub>O/DMSO-*d*<sub>6</sub>) δ 169.54, 169.16, 162.57, 157.76, 152.54, 147.24, 143.99, 140.90, 140.21, 140.09, 139.47, 138.77, 138.43, 135.07, 134.34, 133.73, 132.24, 131.35, 129.95, 129.66, 128.76, 128.61, 128.04, 127.98, 127.08, 126.99, 126.46, 125.25, 124.93, 123.59, 119.74, 53.31,

38.73.MS (MALDI-TOF): Calcd. for  $[\text{C}_{50}\text{H}_{35}\text{AuN}_3\text{O}_4]^+$ : 938.23, found: 938.08.



### 3 Synthesis and Characterization of UiO-68-Me and UiO-68[Au1/Au2]

Using dimethylformamide as the solvent and trifluoroacetic acid as the modulator, under solvothermal conditions of 120 °C and a reaction time of 48 h, **UiO-68[Au1]<sub>1.2-4.5%</sub>** and **UiO-68[Au2]<sub>2.6%</sub>** were successfully synthesized. Using a mixed-linker synthetic strategy, **UiO-68[Au1]<sub>1.2-4.5%</sub>** with different gold(III) complex contents was prepared and obtained as colorless crystals by varying the molar ratio of H<sub>2</sub>TPDC-[Au1] and H<sub>2</sub>TPDC from 1:20 to 1:5. Similarly, **UiO-68[Au2]<sub>2.6%</sub>** was prepared by reacting a mixture of H<sub>2</sub>TPDC-[Au2] and H<sub>2</sub>TPDC with a molar ratio of 1:10 under the same solvothermal conditions as **UiO-68[Au1]<sub>1.2-4.5%</sub>**. This reaction yields **UiO-68[Au2]<sub>2.6%</sub>** as a colorless and highly crystalline powder.

#### 3.1 Synthesis of the UiO-68-Me

According to the literature,<sup>4</sup> ZrCl<sub>4</sub> (9.3 mg, 0.04 mmol), H<sub>2</sub>TPDC (11.3 mg, 0.034 mmol), trifluoroacetic acid (60 μL) and DMF (2 mL) were charged in a Teflon®-capped 20 mL scintillation vial, and the mixture was sonicated for 5 min until the solid was completely dissolved. The resulting mixture was then heated in an oven at 120 °C for 48 h. After cooling to room temperature, the sample was washed with DMF and the solvent was exchanged with MeCN. UiO-68-Me was obtained as a colorless transparent crystal (yield: 67%).

#### 3.2 Synthesis of the UiO-68[Au1/Au2]

ZrCl<sub>4</sub> (9.3 mg, 0.04 mmol), H<sub>2</sub>TPDC, H<sub>2</sub>TPDC-[Au1] (or H<sub>2</sub>TPDC-[Au2]) (the respective amounts shown in Table S1), trifluoroacetic acid (60 μL) and DMF (2 mL) were charged in a Teflon®-capped 20 mL scintillation vial and the mixture was sonicated for 5 min until the solid was completely dissolved. The resulting mixture was then heated in an oven at 120 °C for 48 h. After cooling to room temperature, the fresh sample was washed with DMF and the solvent was exchanged with MeCN. **UiO-68[Au1/Au2]** was obtained as a colorless transparent crystal. PXRD suggested that **UiO-68[Au1]** and **UiO-68[Au2]** are isostructural with **UiO-68-Me** (Fig. S11a–14a). The concentration of gold(III) complexes covalently linked to the MOF was determined using ICP-MS (Table S2)

**Table S1.** The feed ratio of linkers **H<sub>2</sub>TPDC** and **H<sub>2</sub>TPDC-[Au1/Au2]** used in the preparation of **UiO-68[Au1/Au2]**.

| <b>MOF</b>                        | <b>Feed ratio<br/>(H<sub>2</sub>L:H<sub>2</sub>L<sup>Au1/Au2</sup>)</b> | <b>H<sub>2</sub>TPDC<br/>(mmol)</b> | <b>H<sub>2</sub>TPDC-[Au1/Au2]<br/>(mmol)</b> |
|-----------------------------------|-------------------------------------------------------------------------|-------------------------------------|-----------------------------------------------|
| <b>UiO-68[Au1]<sub>1.2%</sub></b> | 20:1                                                                    | 0.032                               | 0.0016                                        |
| <b>UiO-68[Au1]<sub>2.4%</sub></b> | 10:1                                                                    | 0.031                               | 0.0031                                        |
| <b>UiO-68[Au1]<sub>4.5%</sub></b> | 5:1                                                                     | 0.028                               | 0.0056                                        |
| <b>UiO-68[Au2]<sub>2.6%</sub></b> | 10:1                                                                    | 0.031                               | 0.0031                                        |

### 3.3 SEM and EDS mapping of UiO-68-Me and UiO-68[Au1/Au2]

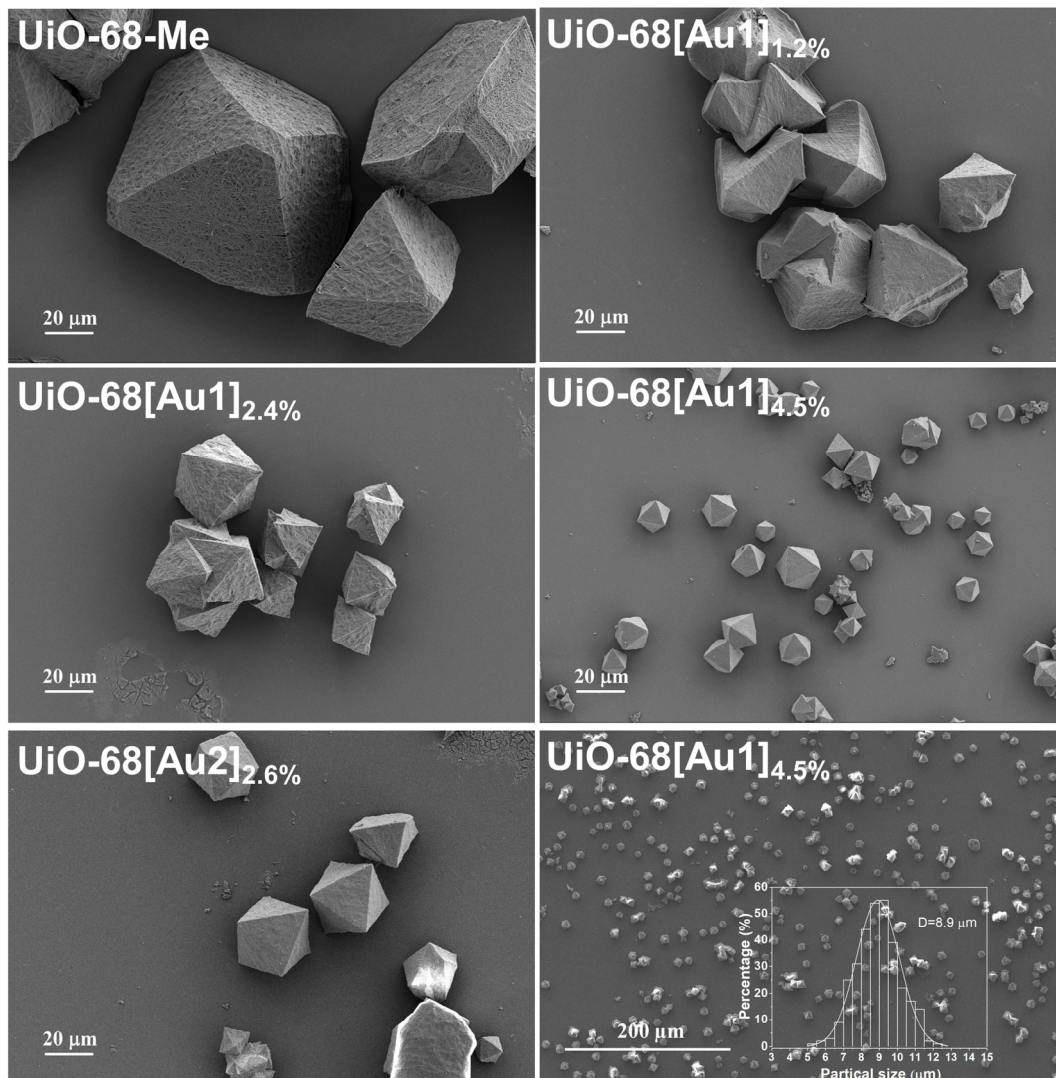

**Fig. S1.** SEM images of single crystal **UiO-68-Me**, **UiO-68[Au1]<sub>1.2-4.5%</sub>** and **UiO-68[Au2]<sub>2.6%</sub>**. Inset: histogram showing the particle size distribution of **UiO-68[Au1]<sub>4.5%</sub>** based on SEM measurements.

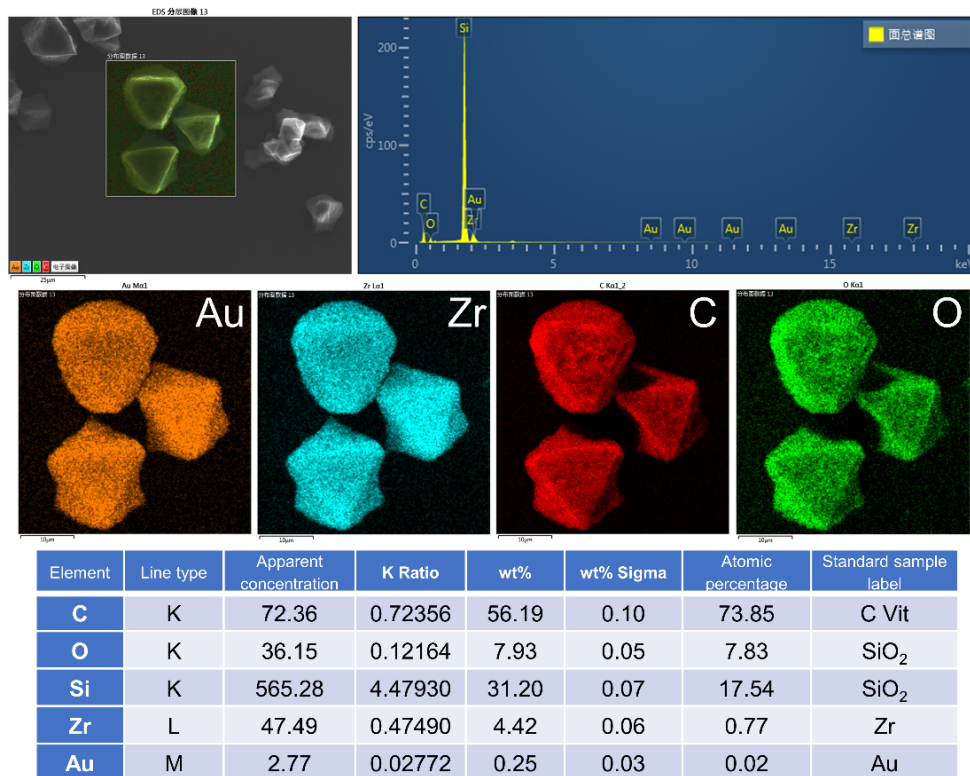

Fig. S2. SEM-EDS mapping of UiO-68[Au1]<sub>1.2%</sub>.

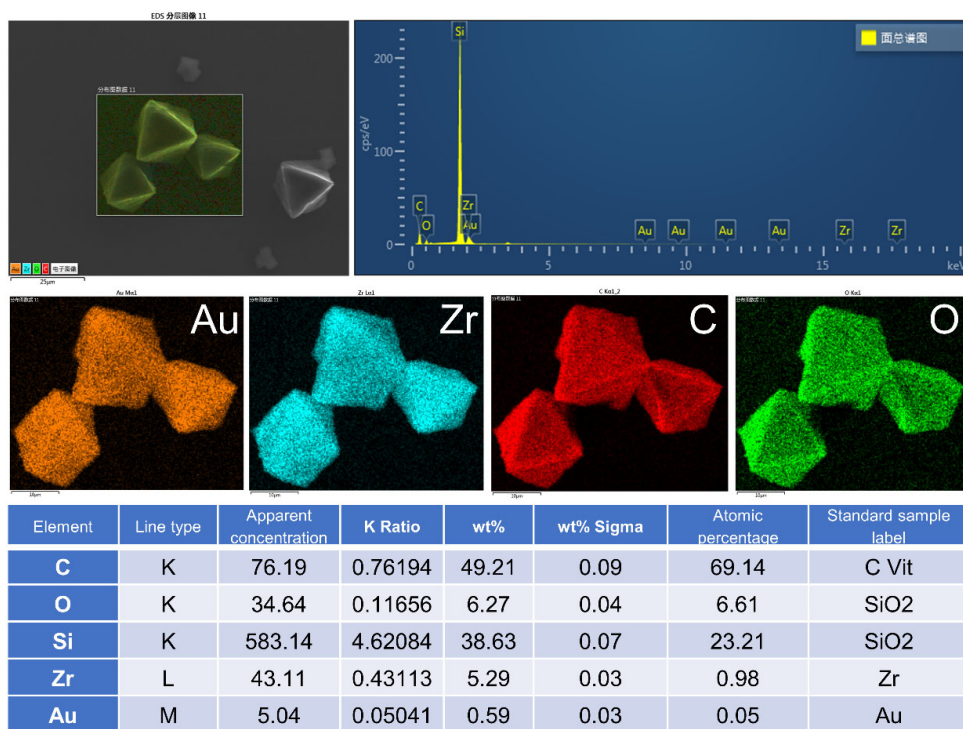

Fig. S3. SEM-EDS mapping of UiO-68[Au1]<sub>2.4%</sub>.

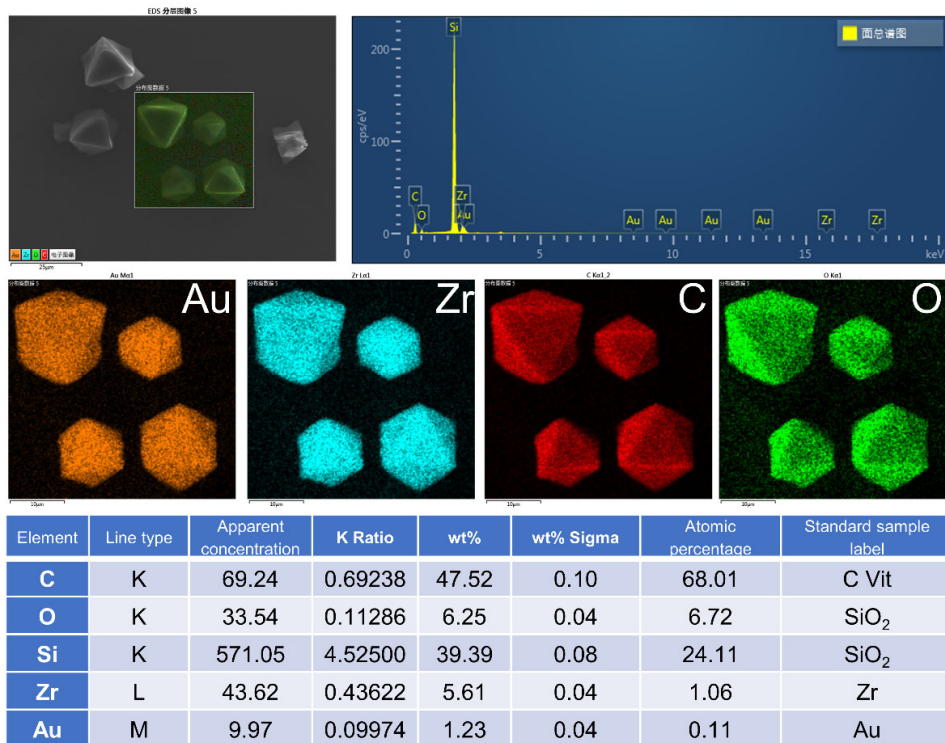

**Fig. S4.** SEM-EDS mapping of UiO-68[Au1]<sub>4.5%</sub>.

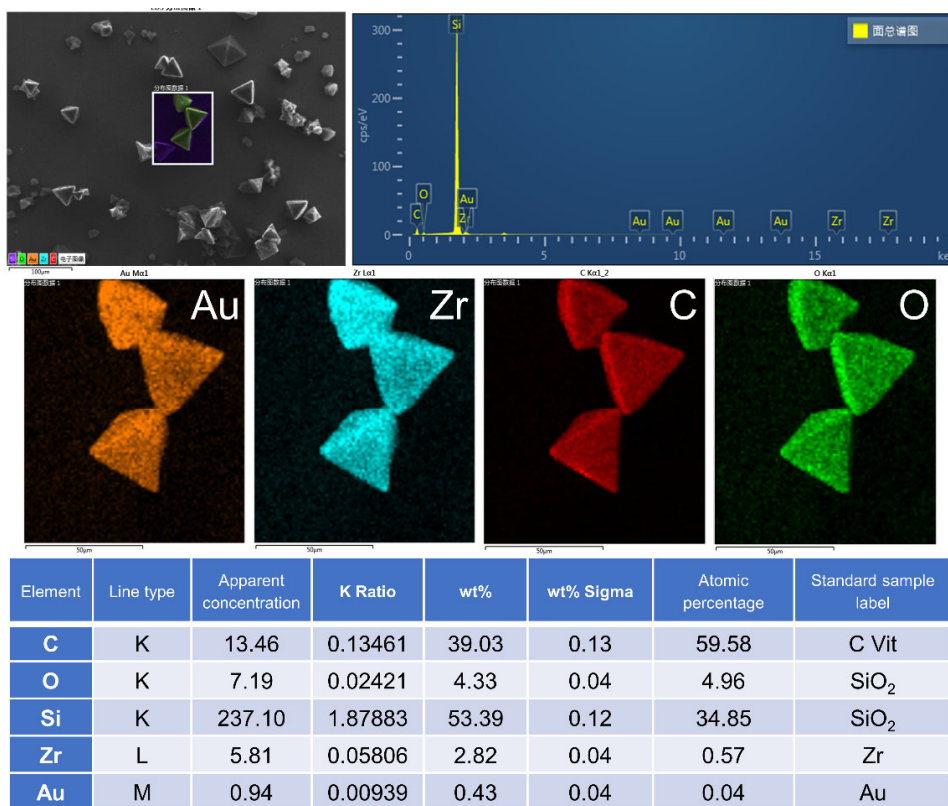

**Fig. S5.** SEM-EDS mapping of UiO-68[Au2]<sub>2.6%</sub>.

### 3.4 XPS analysis of Au(C<sup>^</sup>N<sup>^</sup>C)Cl, Au(C<sub>np</sub><sup>^</sup>N<sup>^</sup>C<sub>np</sub>)Cl, UiO-68[Au1/Au2], and UiO-68[Au1] after treatment with NaBH<sub>4</sub>

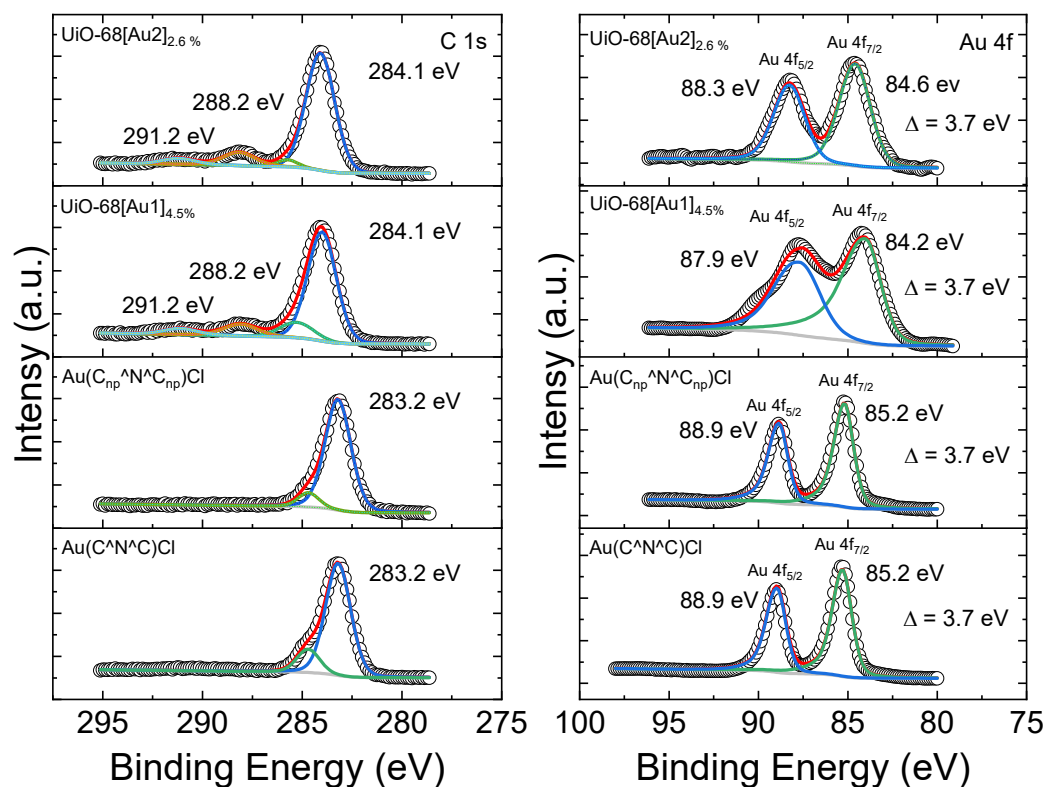

**Fig. S6** XPS curve fitting of the Au 4f and C 1s photoelectron peaks in Au(C<sup>^</sup>N<sup>^</sup>C)Cl, Au(C<sub>np</sub><sup>^</sup>N<sup>^</sup>C<sub>np</sub>)Cl, UiO-68[Au1]<sub>4.5%</sub> and UiO-68[Au2]<sub>2.6%</sub>. (The dotted line refers to the raw data, and the solid line to the curve-fitting result. The curve fitting of the Au 4f core-level spectrum was performed by using two spin-orbit split Au 4f<sub>7/2</sub> and Au 4f<sub>5/2</sub> components, separated by 3.7 eV.)

Procedure for treating UiO-68[Au1]<sub>4.5%</sub> with NaBH<sub>4</sub>:

Disperse 10 mg of UiO-68[Au1]<sub>4.5%</sub> in 2 mL of DMF and stir the resulting mixture in an ice bath for 0.5 h. A freshly prepared DMF solution of NaBH<sub>4</sub> (0.1 M, 1.5 mL) was added under vigorous stirring. After the addition was completed, the reaction mixture was stirred for 12 h, resulting in a purple suspension. After the reaction, the insoluble substance was collected by centrifugation.

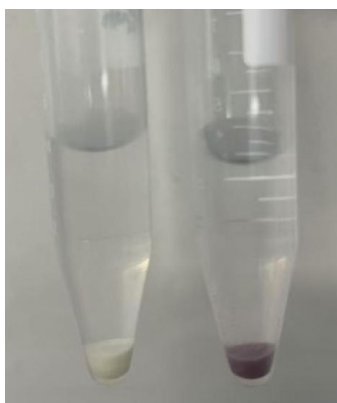

**Fig. S7.** Pictures of (left) **UiO-68[Au1]<sub>4.5%</sub>** after the [2+2] styrene (1a) cycloaddition reaction and (right) **UiO-68[Au1]<sub>4.5%</sub>** after treatment with NaBH<sub>4</sub>.

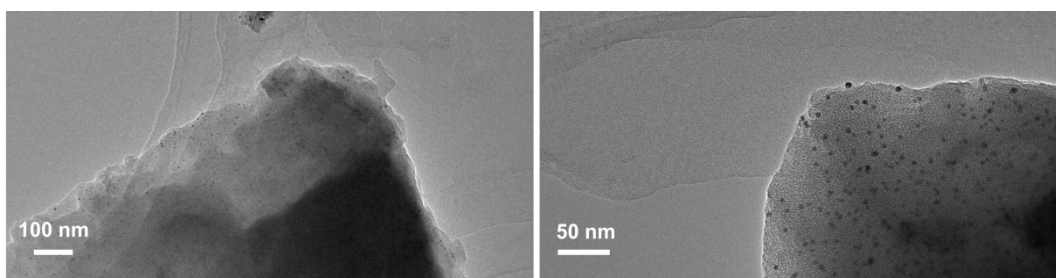

**Fig. S8.** TEM images of **UiO-68[Au1]<sub>4.5%</sub>** after treatment with NaBH<sub>4</sub>.

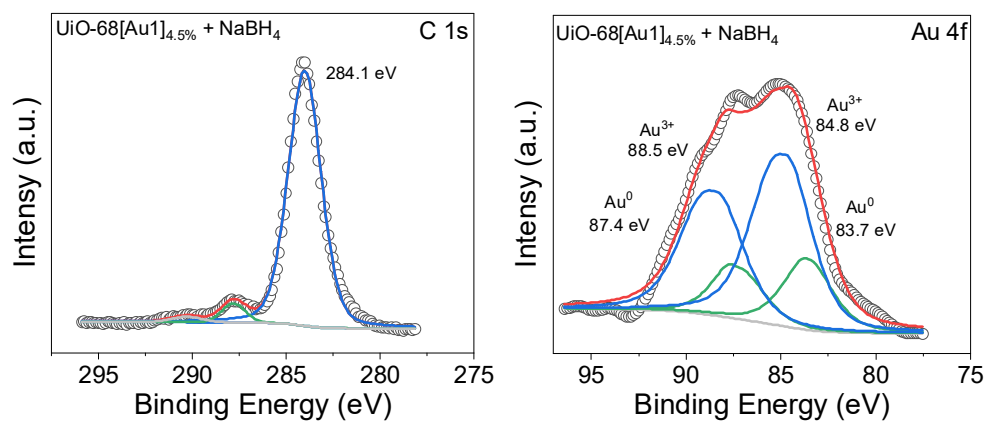

**Fig. S9.** XPS curve fitting of the Au 4f and C 1s photoelectron peaks in **UiO-68[Au1]<sub>4.5%</sub>** after treatment with NaBH<sub>4</sub>. (The dotted line refers to the raw data, and the solid line to the curve-fitting result.)

### 3.5 ICP-MS results of UiO-68[Au1/Au2]

Table S2. ICP-MS results of UiO-68[Au1] and UiO-68[Au2].

| MOF                         | Zr(wt%) | Au(wt%) | Zr (mol %):Au(mol %) |
|-----------------------------|---------|---------|----------------------|
| UiO-68[Au1] <sub>1.2%</sub> | 13.8%   | 1.2%    | 25.6:1               |
| UiO-68[Au1] <sub>2.4%</sub> | 14.4%   | 2.4%    | 13.1:1               |
| UiO-68[Au1] <sub>4.5%</sub> | 13.1%   | 4.5%    | 6.3:1                |
| UiO-68[Au2] <sub>2.6%</sub> | 17.9%   | 2.6%    | 15.1:1               |

### 3.6 Digestion experiment

#### General procedure for the digestion experiment

A 1:1 (v/v) mixture of saturated potassium phosphate ( $K_3PO_4$ ) solution in  $D_2O$  and  $DMSO-d_6$  (total volume 1 mL) was thoroughly mixed. The activated MOF (8 mg) was then added to the resulting mixture. A clear solution was obtained after ultrasonic treatment for several minutes. The resulting sample was subjected to NMR measurements.

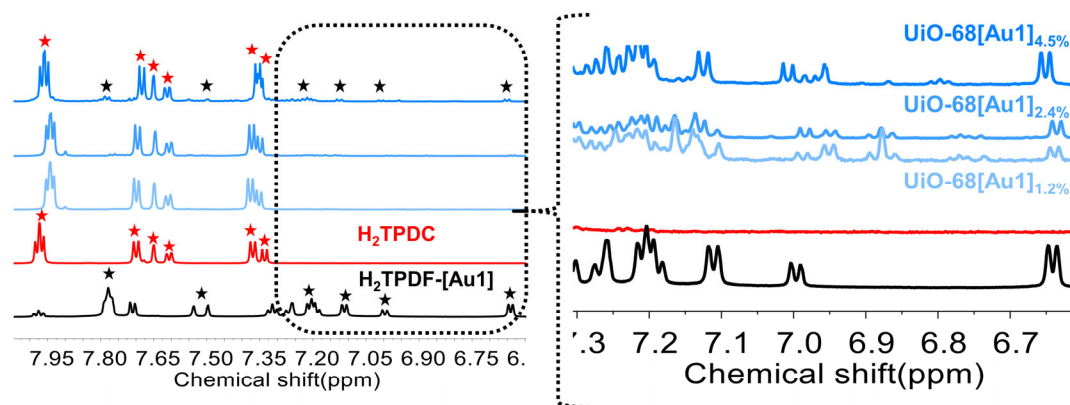

Fig. S10. Comparison of  $^1H$  NMR spectra ( $K_3PO_4/D_2O/ DMSO-d_6$ , 600 MHz) of  $UiO-68[Au1]_{1.2\%-4.5\%}$ ,  $H_2TPDC$ , and  $H_2TPDC-[Au1]$ .



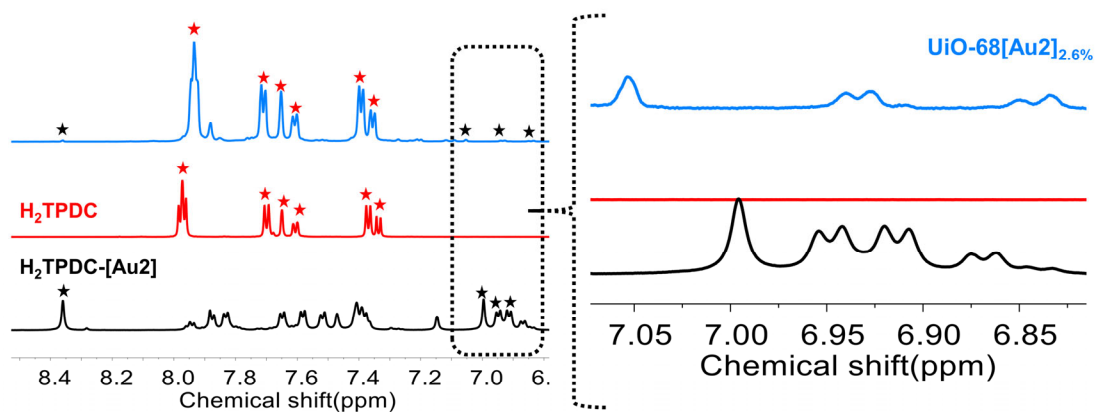

**Fig. S11.** Comparison of  $^1\text{H}$  NMR spectra ( $\text{K}_3\text{PO}_4/\text{D}_2\text{O}/\text{DMSO-}d_6$ , 600 MHz) of **UiO-68[Au<sub>2</sub>]<sub>2.6%</sub>**, **H<sub>2</sub>TPDC**, and **H<sub>2</sub>TPDC-[Au<sub>2</sub>]**.

### 3.7 PXRD patterns of **UiO-68[Au<sub>1</sub>]** treated under different conditions

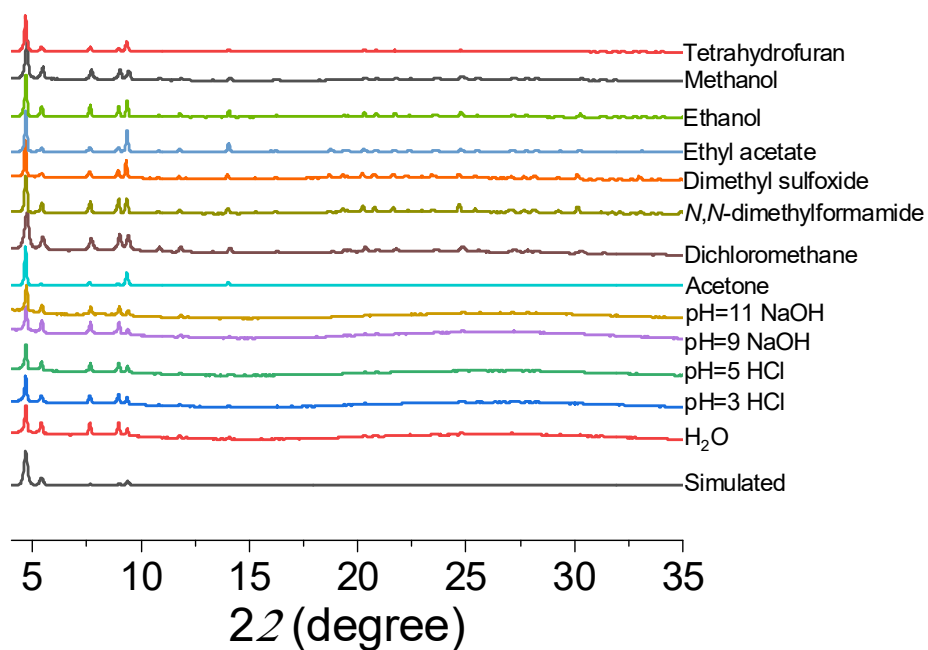

**Fig. S12.** PXRD patterns of **UiO-68[Au<sub>1</sub>]<sub>4.5%</sub>** after immersion in different solvents, HCl solution, and NaOH solution for 12 h.

### 3.8 PXRD patterns and TGA curves of UiO-68-Me, UiO-68[Au1], and

#### UiO-68[Au2]

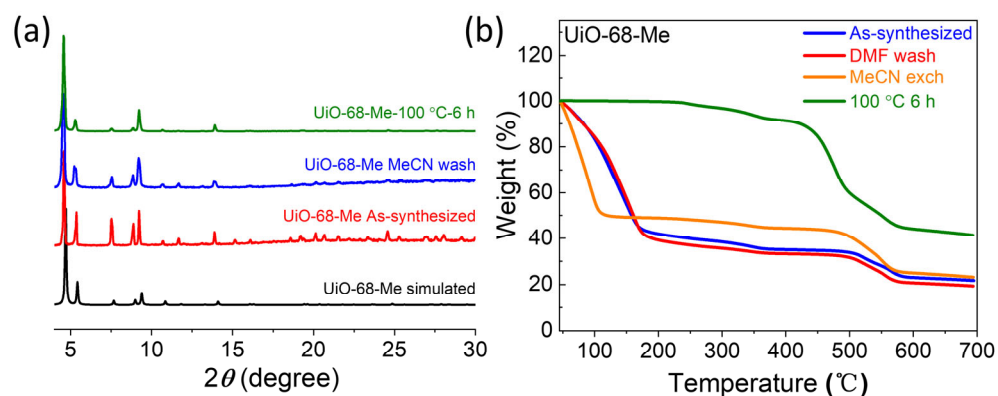

**Fig. S13.** PXRD patterns (a) and TGA curves (b) of **UiO-68-Me** before/after solvent (DMF and MeCN) exchange and after thermal treatment at 100 °C for 6 h.

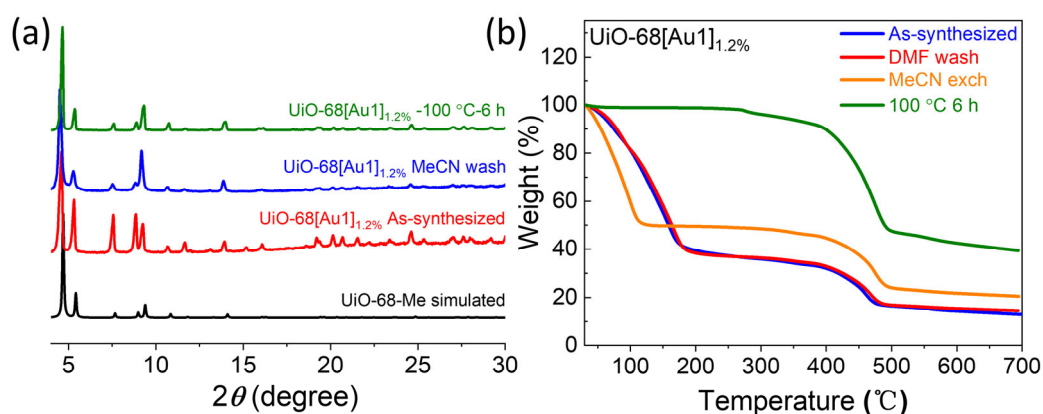

**Fig. S14.** PXRD patterns (a) and TGA curves (b) of **UiO-68[Au1]<sub>1.2%</sub>** before/after solvent (DMF and MeCN) exchange and after thermal treatment at 100 °C for 6 h.

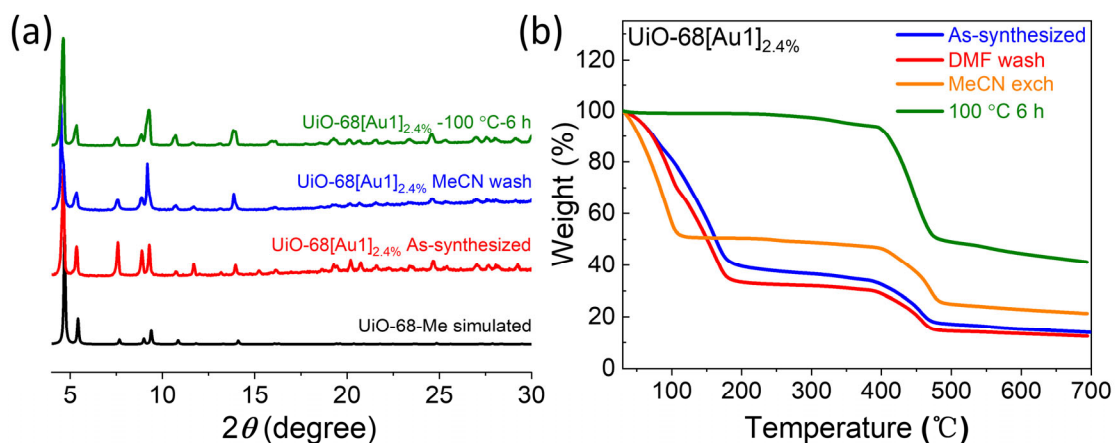

**Fig. S15.** PXRD patterns (a) and TGA curves (b) of **UiO-68[Au1]<sub>2.4%</sub>** before/after solvent (DMF and MeCN) exchange and after thermal treatment at 100 °C for 6 h.

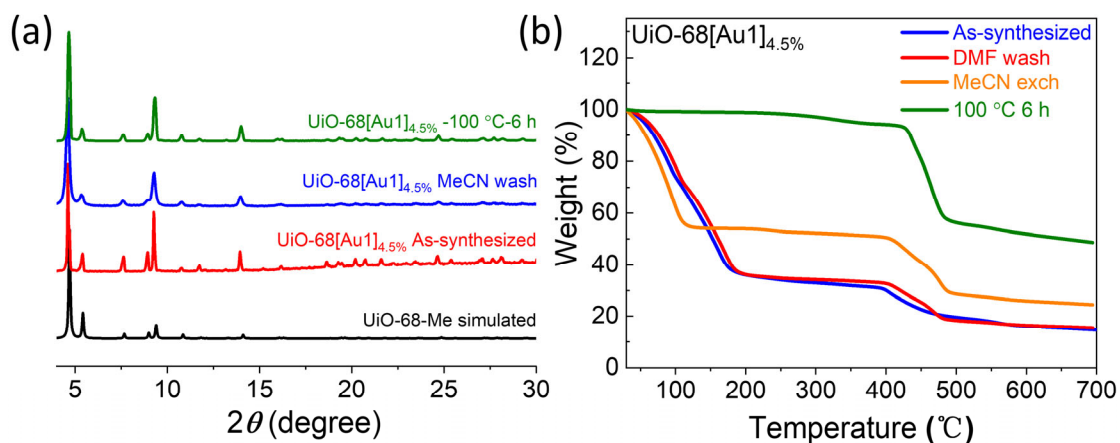

**Fig. S16.** PXRD patterns (a) and TGA curves (b) of **UiO-68[Au1]<sub>4.5%</sub>** before/after solvent (DMF and MeCN) exchange and after thermal treatment at 100 °C for 6 h.

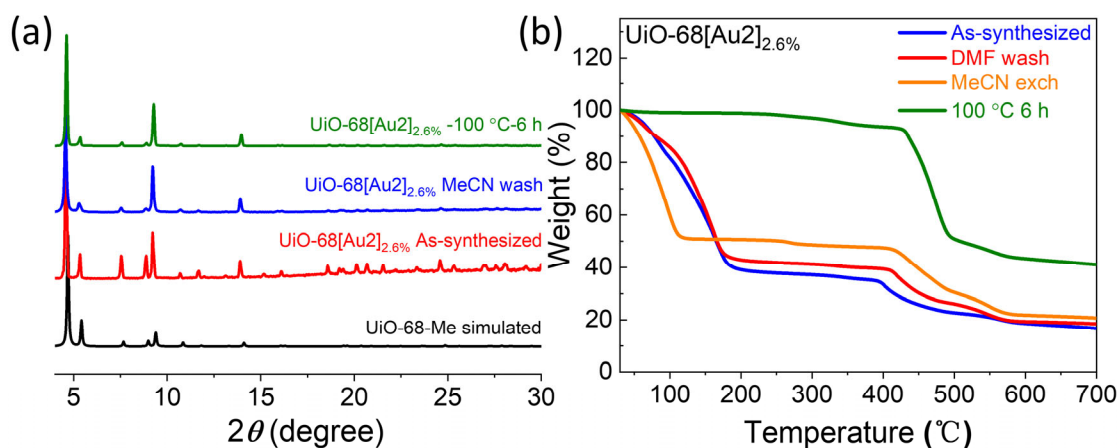

**Fig. S17.** PXRD patterns (a) and TGA curves (b) of **UiO-68[Au2]<sub>2.6%</sub>** before/after solvent (DMF and MeCN) exchange and after thermal treatment at 100 °C for 6 h.

### 3.9 BET surface area and pore volume of UiO-68-Me, UiO-68[Au1], and UiO-68[Au2]

(a)

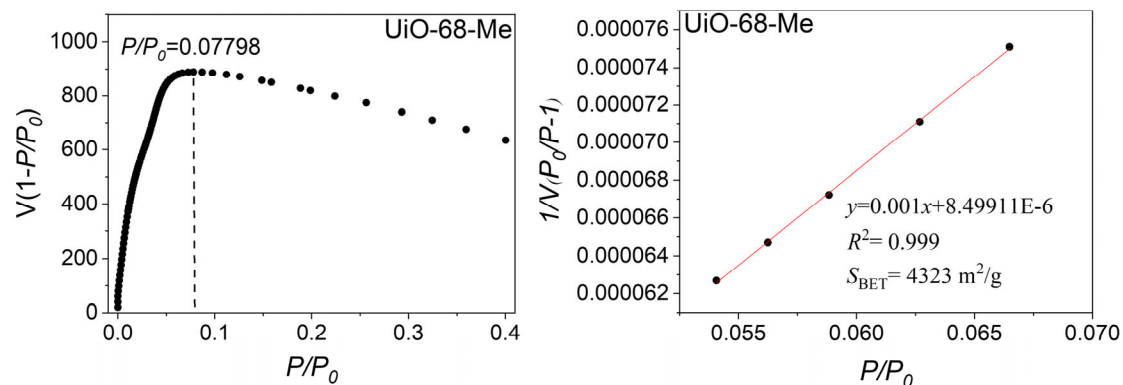

(b)

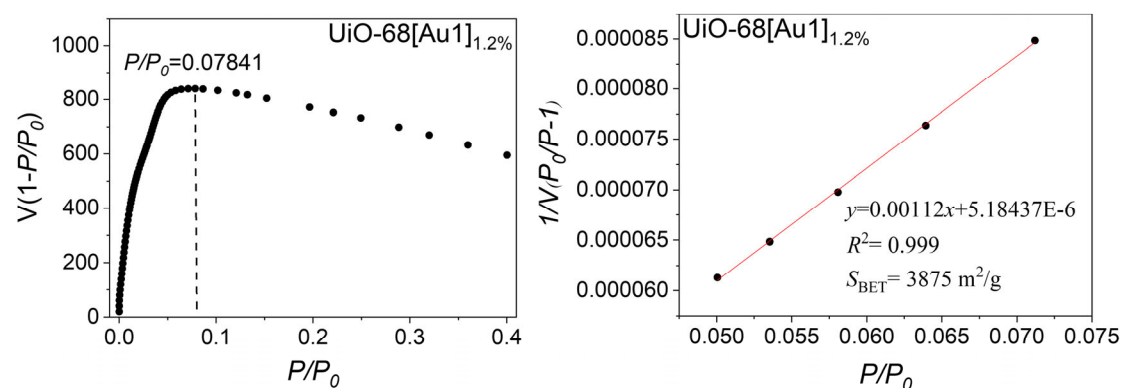

(c)

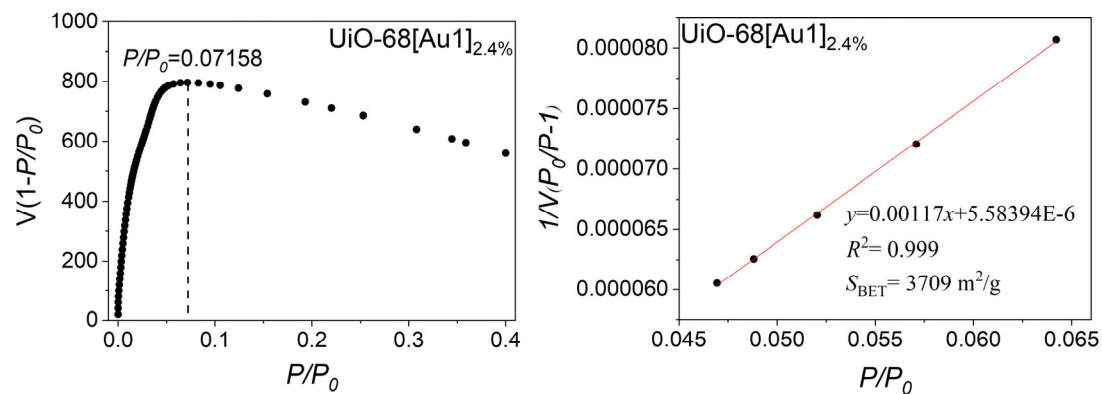

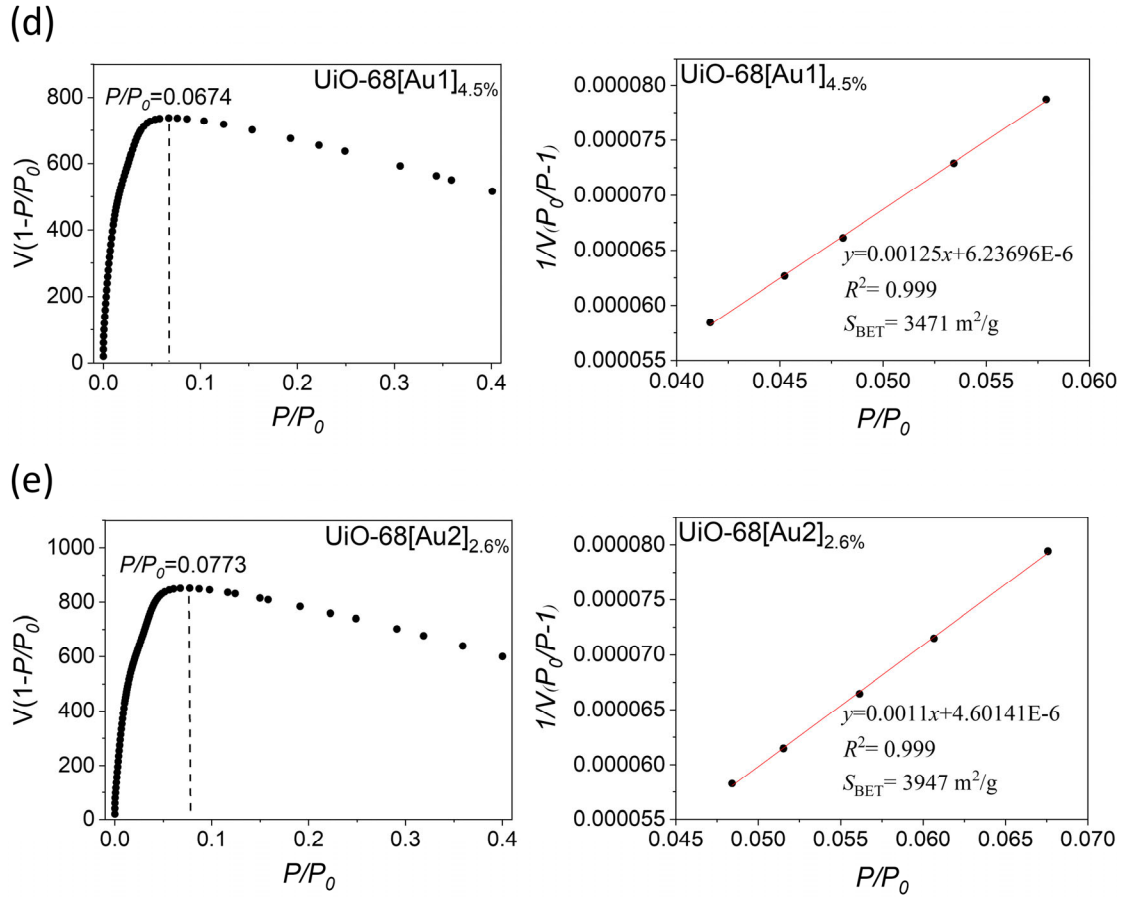

**Fig. S18.** BET plots of (a) **UiO-68-Me**, (b–d) **UiO-68[Au1]<sub>1.2-4.5%</sub>** and (e) **UiO-68[Au2]<sub>2.6%</sub>**. BET surface areas were calculated using the following BET equations S1 to S5, respectively.

$$S_{\text{BET}}(\text{UiO-68-Me}) = 1/(8.49911 \times 10^{-6} + 0.001)/22414 \times 6.023 \times 10^{23} \times 0.162 \times 10^{-18} = 4323 \text{ m}^2/\text{g} \text{ (S1)}$$

$$S_{\text{BET}}(\text{UiO-68[Au1]}_{1.2\%}) = 1/(5.18437 \times 10^{-6} + 0.00112)/22414 \times 6.023 \times 10^{23} \times 0.162 \times 10^{-18} = 3875 \text{ m}^2/\text{g} \text{ (S2)}$$

$$S_{\text{BET}}(\text{UiO-68[Au1]}_{2.4\%}) = 1/(5.58394 \times 10^{-6} + 0.00117)/22414 \times 6.023 \times 10^{23} \times 0.162 \times 10^{-18} = 3709 \text{ m}^2/\text{g} \text{ (S3)}$$

$$S_{\text{BET}}(\text{UiO-68[Au1]}_{4.5\%}) = 1/(6.23696 \times 10^{-6} + 0.00125)/22414 \times 6.023 \times 10^{23} \times 0.162 \times 10^{-18} = 3471 \text{ m}^2/\text{g} \text{ (S4)}$$

$$S_{\text{BET}}(\text{UiO-68[Au2]}_{2.6\%}) = 1/(4.60141 \times 10^{-6} + 0.0011)/22414 \times 6.023 \times 10^{23} \times 0.162 \times 10^{-18} = 3947 \text{ m}^2/\text{g} \text{ (S5)}$$

**Table S3.** Comparison of the pore volume and BET surface area for **UiO-68-Me** and **UiO-68[Au1]**.

| Samples                           | Pore volume <sup>a</sup> (cm <sup>3</sup> /g) | S <sub>BET</sub> (cm <sup>2</sup> /g) |
|-----------------------------------|-----------------------------------------------|---------------------------------------|
| <b>UiO-68-Me</b>                  | 1.67                                          | 4323                                  |
| <b>UiO-68[Au1]<sub>1.2%</sub></b> | 1.56                                          | 3875                                  |
| <b>UiO-68[Au1]<sub>2.4%</sub></b> | 1.48                                          | 3709                                  |
| <b>UiO-68[Au1]<sub>4.5%</sub></b> | 1.36                                          | 3471                                  |
| <b>UiO-68[Au2]<sub>2.6%</sub></b> | 1.58                                          | 3947                                  |

<sup>a</sup> Pore volume calculated from the maximum amounts of N<sub>2</sub> adsorbed.

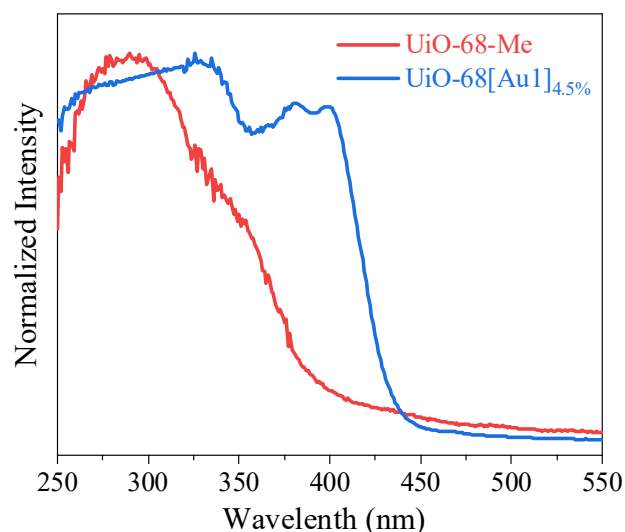

**Fig. S19.** UV-visible diffuse reflectance spectrum of **UiO-68-Me** and **UiO-68[Au1]<sub>4.5%</sub>**.

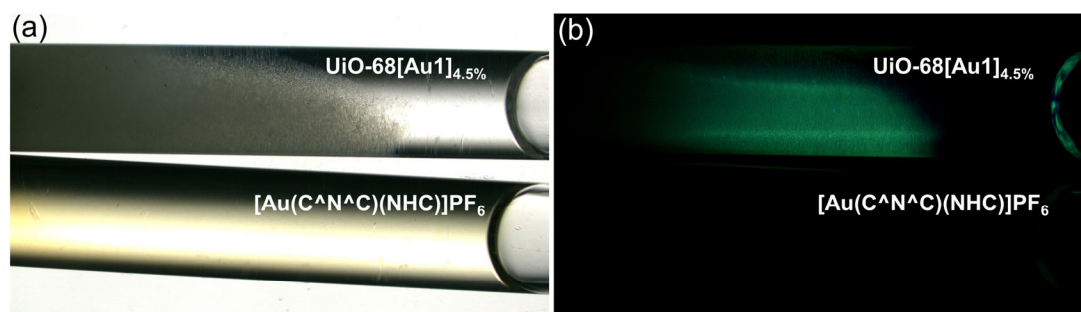

**Fig. S20.** Photographs of **UiO-68[Au1]<sub>4.5%</sub>** and **[Au(C^N^C)(NHC)]PF<sub>6</sub>** under natural light (a) and 365 nm UV light (b) under air (**UiO-68[Au1]<sub>4.5%</sub>** was suspended in DMF, while **[Au(C^N^C)(NHC)]PF<sub>6</sub>** was dissolved in DMF.).

## 4 Synthesis and characterization of substrates

### 4.1 General procedure A for preparing diallyl ethers and *N*-tosylamides

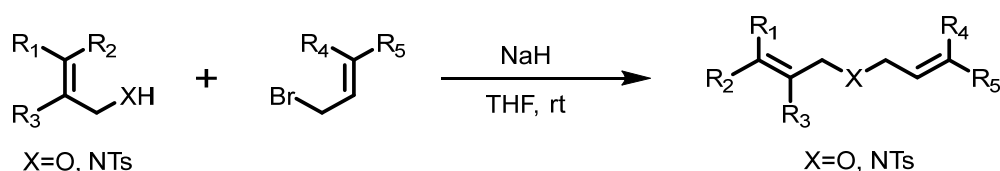

To a stirred suspension of sodium hydride (60 wt% with mineral oil, 8 mmol, 2 equiv.) in 10 mL of dry THF at 0 °C, a dry THF solution (10 mL) of the corresponding alcohol or tosylamide (4 mmol, 1 equiv.) was added dropwise. The mixture was stirred at room temperature for 30 min. A solution of allyl bromide (6 mmol, 1.5 equiv.) in 10 mL of dry THF was then added dropwise to the reaction mixture. The resulting mixture was stirred at room temperature until the reaction was complete, as monitored by thin-layer chromatography (TLC). A saturated aqueous NH<sub>4</sub>Cl solution was added to the reaction mixture, and the resulting mixture was extracted with DCM three times. The combined organic phases were dried over MgSO<sub>4</sub>, filtered, and concentrated under reduced pressure. The crude product was purified by column chromatography on silica gel to afford pure diallyl ethers or *N*-tosylamides in high isolated yields.

#### *N*-allyl-*N*-cinnamyl-4-methylbenzenesulfonamide (**1a**)<sup>5</sup>

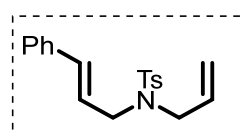

Synthesized from *N*-cinnamyl-tosylamide and allyl bromide following general procedure A. Yield: 85 %.

<sup>1</sup>H NMR (600 MHz, CDCl<sub>3</sub>) δ 7.73 (d, *J* = 8.3 Hz, 2H), 7.32 – 7.27 (m, 5H), 7.25 – 7.21 (m, 2H), 6.41 (d, *J* = 16.0 Hz, 1H), 5.94 (dt, *J* = 15.9, 6.7 Hz, 1H), 5.70 – 5.60 (m, 1H), 5.19 – 5.14 (m, 2H), 3.96 (d, *J* = 6.6 Hz, 2H), 3.85 (d, *J* = 6.3 Hz, 2H), 2.42 (s, 3H). <sup>13</sup>C NMR (151 MHz, CDCl<sub>3</sub>) δ 143.25, 137.55, 136.27, 133.96, 132.85, 129.70, 128.57, 127.88, 127.26, 126.41, 123.84, 118.95, 49.52, 48.92, 21.50.

#### (*E*)-(3-(allyloxy)prop-1-en-1-yl)benzene (**1b**)<sup>5</sup>

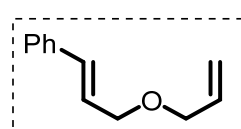

Synthesized from cinnamyl alcohol and allyl bromide following general procedure A. Yield: 80 %.

<sup>1</sup>H NMR (600 MHz, CDCl<sub>3</sub>) δ 7.38 (dd, *J* = 8.1, 1.5 Hz, 2H), 7.31 (t, *J* = 7.6 Hz, 2H), 7.23 (t, *J* = 7.4 Hz, 1H), 6.61 (dt, *J* = 16.0, 1.6 Hz, 1H), 6.30 (dt, *J* = 15.9, 6.0 Hz, 1H), 6.01 – 5.88 (m, 1H), 5.31 (dq, *J* = 17.2, 1.6 Hz, 1H), 5.21 (dq, *J* = 10.4, 1.4 Hz, 1H), 4.16 (dd, *J* = 6.0, 1.5 Hz, 2H), 4.04 (dt, *J* = 5.7, 1.5 Hz, 2H). <sup>13</sup>C NMR (151 MHz, CDCl<sub>3</sub>) δ 136.76, 134.76, 132.42, 128.55, 127.65, 126.48, 126.09, 117.12, 71.14, 70.73.

((1*E*,1'*E*)-oxybis(prop-1-ene-3,1-diyl)dibenzene (**1c**)<sup>5</sup>

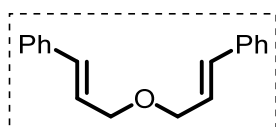

Synthesized from cinnamyl alcohol and cinnamyl bromide following general procedure A. Yield: 84 %.

<sup>1</sup>H NMR (600 MHz, CDCl<sub>3</sub>) δ 7.46 (d, *J* = 7.3 Hz, 2H), 7.37 (t, *J* = 7.6 Hz, 2H), 7.30 (t, *J* = 7.4 Hz, 1H), 6.70 (dt, *J* = 15.9, 1.5 Hz, 1H), 6.39 (dt, *J* = 15.9, 6.0 Hz, 1H), 4.26 (dd, *J* = 6.1, 1.5 Hz, 2H). <sup>13</sup>C NMR (151 MHz, CDCl<sub>3</sub>) δ 136.78, 132.59, 128.60, 127.72, 126.55, 126.09, 70.78.

((*E*)-3-(cinnamyloxy)-2-methylprop-1-en-1-yl)benzene (**1d**)

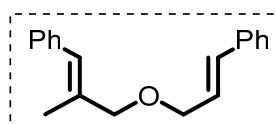

Synthesized from 2-methyl-cinnamyl alcohol and cinnamyl bromide following general procedure A. Yield: 82 %.

<sup>1</sup>H NMR (600 MHz, CDCl<sub>3</sub>) δ 7.40 (d, *J* = 7.3 Hz, 2H), 7.36 – 7.28 (m, 7H), 7.26 – 7.20 (m, 2H), 6.64 (d, *J* = 15.9 Hz, 1H), 6.54 (s, 1H), 6.34 (dt, *J* = 15.9, 6.0 Hz, 1H), 4.19 (dd, *J* = 6.0, 1.4 Hz, 2H), 4.09 (d, *J* = 1.2 Hz, 2H), 1.92 (d, *J* = 1.4 Hz, 3H). <sup>13</sup>C NMR (151 MHz, CDCl<sub>3</sub>) δ 137.57, 136.78, 135.19, 132.43, 128.93, 128.56, 128.11, 127.66, 127.01, 126.50, 126.46, 126.21, 76.30, 70.51, 15.57. HRMS (ESI) Calcd for [C<sub>19</sub>H<sub>20</sub>O + Na]<sup>+</sup>: 287.1406, found: 287.1404.

(*E*)-(3-((3-methylbut-2-en-1-yl)oxy)prop-1-en-1-yl)benzene (**1e**)<sup>5</sup>

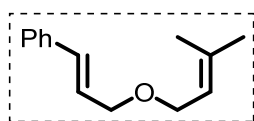

Synthesized from cinnamyl alcohol and 1-bromo-3-methyl-prop-2-ene following general procedure A. Yield: 75 %.

<sup>1</sup>H NMR (600 MHz, CDCl<sub>3</sub>) δ 7.42 (d, *J* = 7.4 Hz, 2H), 7.34 (t, *J* = 7.6 Hz, 2H), 7.29 – 7.24 (m, 1H), 6.64 (dt, *J* = 15.9, 1.5 Hz, 1H), 6.34 (dt, *J* = 15.9, 6.1 Hz, 1H), 5.45 – 5.41 (m, 1H), 4.17 (dd, *J* = 6.1, 1.5 Hz, 2H), 4.06 (d, *J* = 7.0 Hz, 2H), 1.80 (s, 3H), 1.73 (s, 3H). <sup>13</sup>C NMR (151 MHz, CDCl<sub>3</sub>) δ 137.13, 136.85, 132.29, 128.52, 127.58, 126.47, 126.45, 121.10, 70.59, 66.62, 25.82, 18.07.

(*E*)-(3-(cyclohex-2-en-1-yloxy)prop-1-en-1-yl)benzene (**1f**)<sup>6</sup>

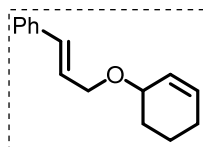

Synthesized from cyclohex-2-enol and cinnamyl bromide following general procedure A. Yield: 80 %.

<sup>1</sup>H NMR (600 MHz, CDCl<sub>3</sub>) δ 7.38 (d, *J* = 7.4 Hz, 2H), 7.30 (t, *J* = 7.6 Hz, 2H), 7.22 (t, *J* = 7.3 Hz, 1H), 6.61 (d, *J* = 16.0 Hz, 1H), 6.31 (dt, *J* = 15.9, 6.0 Hz, 1H), 5.92 – 5.85 (m, 1H), 5.84 – 5.78 (m, 1H), 4.24 (ddd, *J* = 12.7, 5.9, 1.5 Hz, 1H), 4.19 (ddd, *J* = 12.7, 6.0, 1.5 Hz, 1H), 3.98 – 3.94 (m, 1H), 2.12 – 2.03 (m, 1H), 2.01 – 1.92 (m, 1H), 1.89 – 1.83 (m, 1H), 1.83 – 1.75 (m, 1H), 1.75 – 1.69 (m, 1H), 1.62 – 1.53 (m, 1H). <sup>13</sup>C NMR (151 MHz, CDCl<sub>3</sub>) δ 136.90, 131.86, 130.97, 128.50, 127.77, 127.52, 126.92, 126.47, 72.27, 68.77, 28.49, 25.26, 19.29.

(*E*)-1-(3-((3-methylbut-2-en-1-yl)oxy)prop-1-en-1-yl)-4-nitrobenzene (**1g**)<sup>5</sup>

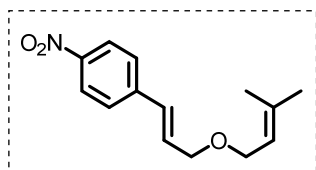

Synthesized from (*E*)-3-(4-nitrophenyl)prop-2-en-1-ol and 1-bromo-3-methylbut-2-ene following general procedure A.

Yield: 85 %. <sup>1</sup>H NMR (600 MHz, Chloroform-*d*) δ 8.21 – 8.15 (m, 2H), 7.52 – 7.49 (m, 2H), 6.69 (d, *J* = 16.0 Hz, 1H), 6.49 (dt, *J* = 16.0, 5.5 Hz, 1H), 5.43 – 5.38 (m, 1H), 4.18 (dd, *J* = 5.5, 1.6 Hz, 2H), 4.05 (d, *J* = 6.7 Hz, 2H), 1.78 (s, 3H), 1.70 (s, 3H). <sup>13</sup>C NMR (151



MHz, Chloroform-*d*)  $\delta$  146.92, 143.35, 137.66, 131.61, 129.43, 126.91, 124.01, 120.70, 69.93, 67.11, 25.85, 18.10.  $^{13}\text{C}$  NMR (151 MHz, Chloroform-*d*)  $\delta$  142.32, 137.60, 135.25, 128.92, 128.10, 126.78, 126.42, 112.19, 76.01, 73.83, 19.60, 15.51.

*(E)*-2-methyl-3-((2-methylallyl)oxy)prop-1-en-1-yl)benzene (*E*)-**1h**

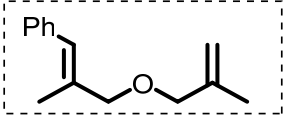 Synthesized from 2-methyl-cinnamyl alcohol and 3-bromo-2-methylprop-1-ene following general procedure A. Yield: 82%.  $^1\text{H}$  NMR (600 MHz, Chloroform-*d*)  $\delta$  7.33 (t,  $J = 7.6$  Hz, 2H), 7.29 (d,  $J = 7.6$  Hz, 2H), 7.21 (t,  $J = 7.2$  Hz, 1H), 6.51 (s, 1H), 5.01 (s, 1H), 4.92 (s, 1H), 4.01 (s, 2H), 3.92 (s, 2H), 1.90 (s, 3H), 1.78 (s, 3H). HRMS (ESI) Calcd for  $[\text{C}_{14}\text{H}_{18}\text{O} + \text{H}]^+$ :203.1430, found:203.1426.

## 4.2 General procedure B for preparing oxime

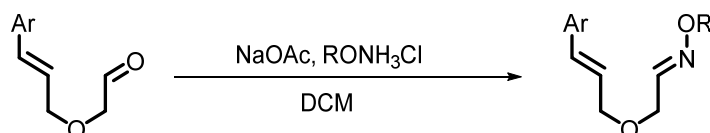

A 50-mL round-bottom flask equipped with a stir bar was charged with 2-(cinnamyloxy)acetaldehyde (1 mmol), DCM (10 mL), NaOAc (4.0 equiv.) and the corresponding hydroxylamine hydrochloride (2.0 equiv.). These reagents were added sequentially. The mixture was stirred at room temperature for 12 h. The reaction progress was monitored by TLC. A saturated aqueous NaHCO<sub>3</sub> solution was added to the reaction mixture. The resulting mixture was extracted with EA three times, and the combined organic phases were washed with brine, dried over Na<sub>2</sub>SO<sub>4</sub>, filtered and concentrated under reduced pressure. The crude product was purified by column chromatography on silica gel (eluent: EA/PE) to afford the product as a mixture of *E/Z* oxime isomers.

2-(Cinnamyloxy)acetaldehyde *o*-methyl oxime (**3a**)<sup>7</sup>

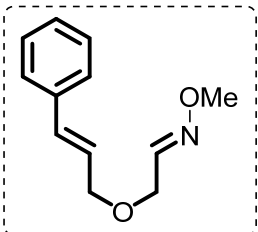 Synthesized from 2-(cinnamyloxy)acetaldehyde and *o*-methylhydroxylamine hydrochloride following general procedure B. Yield: 65 %, *E/Z*(oxime)=1:1.5.  $^1\text{H}$  NMR (600 MHz, CDCl<sub>3</sub>)  $\delta$  7.47 (t,  $J = 5.7$  Hz, 1H; minor), 7.41 – 7.36 (m, 5H; major + minor), 7.35 – 7.29 (m, 5H; major + minor), 7.27 – 7.21 (m, 3H; major + minor), 6.87 (t,  $J = 3.7$  Hz, 1.5H; major), 6.62 (d,  $J = 15.9$  Hz, 2.5H; major + minor), 6.27 (dt,  $J = 15.8, 6.1$  Hz, 2.5H; major + minor), 4.31 (d,  $J = 3.7$  Hz, 3H; major), 4.19 – 4.16 (m, 5H; major + minor), 4.13 (d,  $J = 5.7$  Hz, 2H; minor), 3.87 (s, 7.5H; major + minor).  $^{13}\text{C}$  NMR (151 MHz, CDCl<sub>3</sub>)  $\delta$  150.07, 146.93, 136.52, 136.47, 133.23, 133.21, 128.59, 128.58, 127.87, 127.83, 126.55, 125.23, 125.12, 71.78, 71.19, 66.68, 64.24, 62.08, 61.74.

### 2-(Cinnamyloxy)acetaldehyde *o*-benzyl oxime (**3b**)<sup>7</sup>

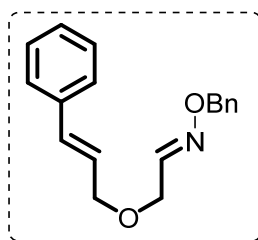

Synthesized from 2-(cinnamyloxy)acetaldehyde and *o*-benzylhydroxylamine hydrochloride following general procedure B. Yield: 71 %, E/Z(oxime) = 1:1.3.

<sup>1</sup>H NMR (400 MHz, CDCl<sub>3</sub>) δ 7.54 (t, *J* = 5.7 Hz, 1H, minor), 7.42 – 7.28 (m, 20H; major + minor), 7.28 – 7.21 (m, 2H; major + minor), 6.92 (t, *J* = 3.6 Hz, 1.3H; major), 6.60 (dd, *J* = 15.9, 11.1 Hz, 2.3H; major + minor), 6.31 – 6.20 (m, 2.3H; major + minor), 5.10 (d, *J* = 1.9 Hz, 4.6H; major + minor), 4.36 (d, *J* = 3.7 Hz, 2.6H; major), 4.19 – 4.14 (m, 4.6H; major + minor), 4.13 (d, *J* = 5.7 Hz, 2H, minor). <sup>13</sup>C NMR (101 MHz, CDCl<sub>3</sub>) δ 150.73, 147.56, 137.59, 137.34, 136.51, 136.45, 133.25, 133.21, 128.59, 128.58, 128.45, 128.43, 128.28, 128.06, 127.98, 127.96, 127.87, 127.83, 126.55, 126.54, 125.20, 125.11, 76.32, 76.08, 71.77, 71.09, 66.65, 64.51.

### 2-(Cinnamyloxy)acetaldehyde oxime (**3c**)<sup>7</sup>

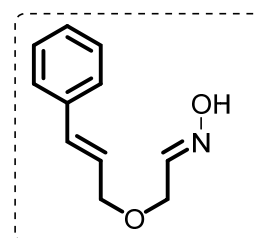

Synthesized from 2-(cinnamyloxy)acetaldehyde and hydroxylamine hydrochloride following general procedure B. Yield: 75%, E/Z(oxime) = 1.1:1.

<sup>1</sup>H NMR (600 MHz, CDCl<sub>3</sub>) δ 8.12 (s, 1H; minor), 7.84 (s, 1.1H; major), 7.54 (t, *J* = 5.6 Hz, 1.1H; major), 7.41 – 7.37 (m, 4.2H; major + minor), 7.34 – 7.29 (m, 4.2H; major + minor), 7.27 – 7.24 (m, 2.1H; major + minor), 6.95 (t, *J* = 3.7 Hz, 1H; minor), 6.63 (dd, *J* = 15.9, 8.6 Hz, 2.1H; major + minor), 6.27 (dq, *J* = 15.9, 6.2 Hz, 2.1H; major + minor), 4.40 (d, *J* = 3.7 Hz, 2H; minor), 4.19 (ddd, *J* = 8.0, 6.2, 1.4 Hz, 4.2H; major + minor), 4.15 (d, *J* = 5.6 Hz, 2.2H; major). <sup>13</sup>C NMR (151 MHz, CDCl<sub>3</sub>) δ 151.33, 148.58, 136.49, 136.45, 133.33, 133.29, 128.60, 128.58, 127.89, 127.86, 126.57, 126.56, 125.13, 125.04, 71.86, 71.21, 66.61, 63.88.

### 2-(Cinnamyloxy)acetaldehyde *o*-methyl oxime (**3d**)<sup>7</sup>

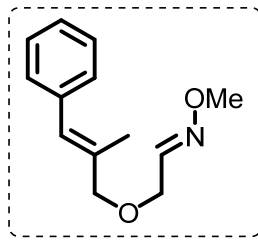

Synthesized from (*E*)-2-((2-methyl-3-phenylallyl)oxy)acetaldehyde and *o*-methylhydroxylamine hydrochloride following general procedure B. Yield: 85 %, E/Z(oxime) = 1:1.

<sup>1</sup>H NMR (600 MHz, CDCl<sub>3</sub>) δ 7.48 (t, *J* = 5.7 Hz, 1H; major), 7.33 (td, *J* = 7.7, 2.4 Hz, 4H; major + minor), 7.28 (dd, *J* = 7.0, 4.3 Hz, 4H; major + minor), 7.24 – 7.20 (m, 2H; major + minor), 6.88 (t, *J* = 3.6 Hz, 1H; minor), 6.51 (s, 2H; major + minor), 4.29 (d, *J* = 3.7 Hz, 2H; minor), 4.11 (d, *J* = 5.7 Hz, 2H; major), 4.05 (s, 4H; major + minor), 3.87 (d, *J* = 2.2 Hz, 6H; major + minor), 1.92 – 1.88 (m, 6H; major + minor). <sup>13</sup>C NMR (151 MHz, CDCl<sub>3</sub>) δ 150.19, 147.05, 137.35, 137.29, 134.48, 134.35, 128.92, 128.15, 128.13, 127.69, 127.66, 126.62, 126.58, 77.39, 76.81, 66.54, 64.04, 62.08, 61.72, 15.49, 15.45.

### 2-(((*E*)-3-(4-Bromophenyl)allyl)oxy)acetaldehyde *o*-methyl oxime(**3e**)<sup>7</sup>

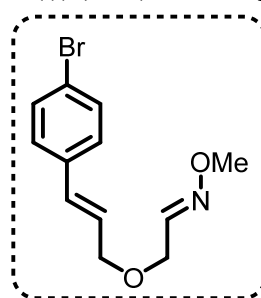

Synthesized from (*E*)-2-((3-(4-bromophenyl)allyl)oxy)acetaldehyde and *o*-methylhydroxylamine hydrochloride following general procedure B. Yield: 72 %, E/Z(oxime) = 1:1.3.

<sup>1</sup>H NMR (600 MHz, CDCl<sub>3</sub>) δ 7.47 (t, *J* = 5.7 Hz, 1H, minor), 7.45 – 7.42 (m, 4.6H; major + minor), 7.26 – 7.22 (m, 4.6H; major + minor), 6.86 (t, *J* = 3.7 Hz, 1.3H; major), 6.56 (dd, *J* = 16.0, 1.7 Hz, 2.3H; major + minor), 4.31 (d, *J* = 3.7 Hz, 2.6H; major), 4.16 (dt, *J* = 6.0, 1.8 Hz, 4.6H; major + minor), 4.12 (d, *J* = 5.7 Hz, 2H, minor), 3.87 (d, *J* = 1.0 Hz, 6.9H; major + minor). <sup>13</sup>C NMR (151 MHz, CDCl<sub>3</sub>) δ 149.90, 146.79, 135.48, 135.43, 131.79, 131.77, 131.72, 131.70, 128.05, 128.04, 126.12, 126.00, 121.66, 121.61, 71.56, 70.93, 66.83, 64.38, 62.10, 61.76.

### 4.3 Synthesis of *tert*-butyl 2-(2-(cinnamyloxy)ethylidene)hydrazine-1-carboxylate (**3f**)<sup>7</sup>

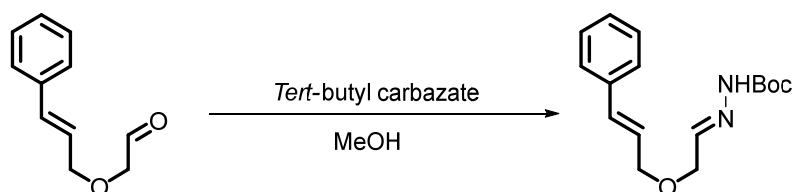

A 50-mL round-bottom flask equipped with a stir bar was charged with 2-(cinnamyloxy)acetaldehyde (1 mmol.), methanol (10 mL), and *tert*-butyl carbazate (1.5 mmol). These chemicals were added sequentially. The mixture was stirred at room temperature for 12 h. A saturated aqueous NaHCO<sub>3</sub> solution was added to the reaction mixture. The resulting mixture was extracted with EA three times, and the combined organic phases were washed with brine, dried over Na<sub>2</sub>SO<sub>4</sub>, filtered and concentrated under reduced pressure. The crude product was purified by column chromatography on silica gel using EA and PE as eluents, affording the pure product as a mixture of E/Z oxime isomers. Yield: 60%, E/Z(oxime) = 2.5:1. <sup>1</sup>H NMR (600 MHz, CDCl<sub>3</sub>) δ 7.78 (s, 2.5H; major), 7.42 – 7.35 (m, 7H; major + minor), 7.34 – 7.28 (m, 7H; major + minor), 7.26 – 7.22 (m, 3.5H; major + minor), 6.65 (d, *J* = 4.1 Hz, 1H; minor), 6.61 (d, *J* = 15.9 Hz, 2.5H; major), 6.31 – 6.22 (m, 3.5H; major + minor), 4.24 – 4.20 (m, 7H; major + minor), 4.20 – 4.15 (m, 7H; major + minor), 1.51 (s, 31.5H; major + minor). <sup>13</sup>C NMR (151 MHz, CDCl<sub>3</sub>) δ 152.21, 152.20, 142.90, 139.06, 136.54, 136.11, 134.25, 133.09, 128.66, 128.56, 128.16, 127.80, 126.61, 126.53, 125.32, 124.12, 81.55, 81.53, 71.75, 71.31, 69.23, 66.64, 28.25.

#### 4.4 General procedure C for preparing halogenated alkyl malonates

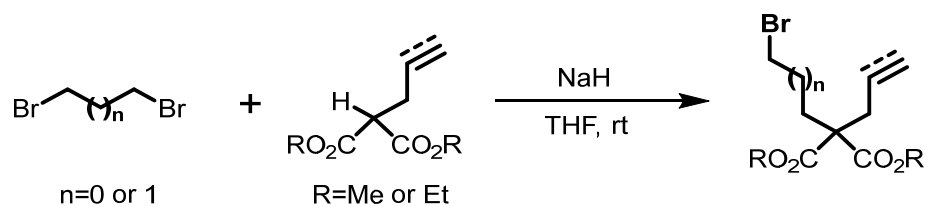

To a stirred suspension of sodium hydride (60 wt% with mineral oil, 10 mmol, 2 equiv.) in 15 mL of dry THF at 0 °C, a solution of diethyl 2-allylmalonate (5 mmol, 1 equiv.) in 15 mL of dry THF was added dropwise. The mixture was stirred at room temperature for 30 min. Then, a solution of the corresponding alkyl bromides (20 mmol, 4 equiv.) in 15 mL of dry THF was added dropwise to the reaction mixture. The resulting mixture was stirred at room temperature until the reaction was complete, as monitored by TLC. A saturated aqueous  $\text{NH}_4\text{Cl}$  solution was then added to the reaction mixture. The resulting mixture was extracted with diethyl ether three times. The organic layer was combined, dried over  $\text{MgSO}_4$ , filtered, and concentrated under reduced pressure. The crude product was purified by column chromatography on silica gel using EA and hexane as eluents, affording pure halogenated alkyl malonates in good isolated yields.

##### Diethyl 2-allyl-2-(2-bromoethyl)malonate (**9a**)<sup>8</sup>

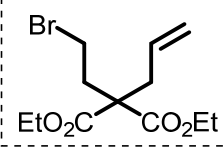

Synthesized from diethyl 2-allylmalonate and 1,2-dibromoethane following general procedure C. Yield: 70 %.

$^1\text{H NMR}$  (400 MHz,  $\text{CDCl}_3$ )  $\delta$  5.71 – 5.58 (m, 1H), 5.19 – 5.12 (m, 2H), 4.21 (q,  $J = 7.1$  Hz, 4H), 3.40 – 3.32 (m, 2H), 2.66 (dt,  $J = 7.5, 1.2$  Hz, 2H), 2.49 – 2.39 (m, 2H), 1.27 (t,  $J = 7.1$  Hz, 6H).  $^{13}\text{C NMR}$  (101 MHz,  $\text{CDCl}_3$ )  $\delta$  170.20, 131.76, 119.67, 61.61, 57.45, 37.73, 36.18, 27.06, 14.05.

##### Diethyl 2-allyl-2-(3-bromopropyl)malonate (**9b**)<sup>8</sup>

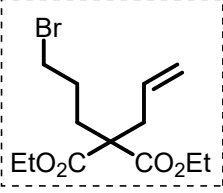

Synthesized from diethyl 2-allylmalonate and 1,3-dibromopropane following general procedure C. Yield: 65%.

$^1\text{H NMR}$  (400 MHz,  $\text{CDCl}_3$ )  $\delta$  5.69 – 5.53 (m, 1H), 5.13 – 5.03 (m, 2H), 4.16 (q,  $J = 7.1$  Hz, 4H), 3.35 (t,  $J = 6.5$  Hz, 2H), 2.61 (d,  $J = 7.4$  Hz, 2H), 2.01 – 1.93 (m, 2H), 1.80 – 1.70 (m, 2H), 1.22 (t,  $J = 7.1$  Hz, 7H).  $^{13}\text{C NMR}$  (101 MHz,  $\text{CDCl}_3$ )  $\delta$  170.86, 132.09, 119.20, 61.32, 56.82, 37.13, 33.18, 31.04, 27.52, 14.10.

##### Dimethyl 2-(2-bromoethyl)-2-(prop-2-yn-1-yl)malonate (**9c**)<sup>9</sup>

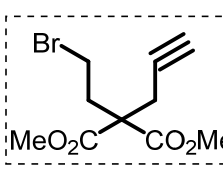

Synthesized from dimethyl 2-(prop-2-yn-1-yl)malonate and 1,2-dibromoethane following general procedure C. Yield: 40 %.

$^1\text{H NMR}$  (400 MHz,  $\text{CDCl}_3$ )  $\delta$  3.77 (s, 6H), 3.43 – 3.37 (m, 2H), 2.86 (d,  $J = 2.7$  Hz, 2H), 2.69 – 2.63 (m, 2H), 2.07 (t,  $J = 2.7$  Hz, 1H).  $^{13}\text{C NMR}$  (101 MHz,  $\text{CDCl}_3$ )  $\delta$  169.73, 78.04, 72.17, 56.74, 53.10, 35.84, 26.80, 23.46.

## 4.5 General procedure D for preparing halogenated alkyl *N*-tosylamides

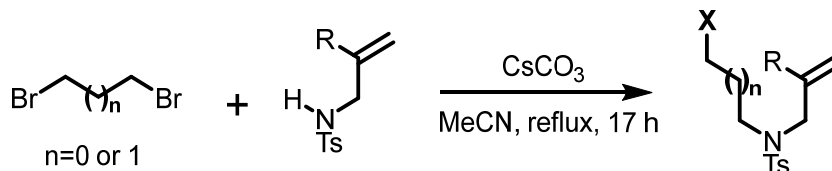

To a suspension of *N*-allyl-4-methylbenzenesulfonamide (106 mg, 0.5 mmol) and  $\text{Cs}_2\text{CO}_3$  (244 mg, 0.75 mmol) in 2 mL of MeCN at room temperature, 1,2-dibromoethane or 1,3-dibromopropane (5 mmol) was added. The mixture was stirred at 80 °C for 17 h. After the reaction, the mixture was filtered. The filtrate was collected and concentrated under reduced pressure. The crude product was purified by column chromatography on silica gel using EA and PE as eluents, affording pure halogenated alkyl *N*-tosylamides as colorless oil.

### *N*-allyl-*N*-(2-bromoethyl)-4-methylbenzenesulfonamide (**9d**)<sup>8</sup>

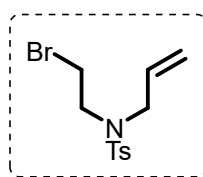

Synthesized from *N*-allyl-4-methylbenzenesulfonamide and 1,2-dibromoethane following general procedure D. Yield: 65 %.

$^1\text{H}$  NMR (600 MHz,  $\text{CDCl}_3$ )  $\delta$  7.73 (d,  $J = 7.9$  Hz, 2H), 7.34 (d,  $J = 7.9$  Hz, 2H), 5.75 – 5.64 (m, 1H), 5.25 – 5.19 (m, 2H), 3.84 (d,  $J = 6.5$  Hz, 2H), 3.52 – 3.39 (m, 4H), 2.46 (s, 3H).  $^{13}\text{C}$  NMR (151 MHz,  $\text{CDCl}_3$ )  $\delta$  143.71, 136.36, 132.89, 129.86, 127.19, 119.67, 52.02, 48.96, 29.25, 21.53.

### *N*-allyl-*N*-(3-bromopropyl)-4-methylbenzenesulfonamide (**9e**)

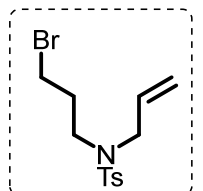

Synthesized from *N*-allyl-4-methylbenzenesulfonamide and 1,3-dibromopropane following general procedure D. Yield: 67 %.

$^1\text{H}$  NMR (400 MHz,  $\text{CDCl}_3$ )  $\delta$  7.71 (d,  $J = 8.3$  Hz, 2H), 7.32 (d,  $J = 8.0$  Hz, 2H), 5.71 – 5.57 (m, 1H), 5.26 – 5.12 (m, 2H), 3.80 (dt,  $J = 6.4, 1.3$  Hz, 2H), 3.42 (t,  $J = 6.5$  Hz, 2H), 3.24 (dd,  $J = 7.7, 6.3$  Hz, 2H), 2.44 (s, 3H), 2.13 (p,  $J = 6.5$  Hz, 2H).  $^{13}\text{C}$  NMR (126 MHz,  $\text{CDCl}_3$ )  $\delta$  143.46, 136.49, 132.90, 129.79, 127.22, 119.41, 51.60, 46.09, 31.83, 30.46, 21.55. HRMS (ESI) Calcd for  $[\text{C}_{13}\text{H}_{18}\text{NO}_2\text{SBr} + \text{Na}]^+$ : 354.0134, found: 354.0131.

### *N*-(2-bromoethyl)-4-methyl-*N*-(2-methylallyl)benzenesulfonamide (**9f**)<sup>10</sup>

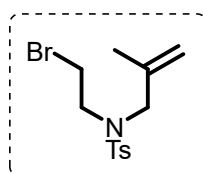

Synthesized from 4-methyl-*N*-(2-methylallyl)benzenesulfonamide and 1,2-dibromoethane following general procedure D. Yield: 62 %.

$^1\text{H}$  NMR (400 MHz,  $\text{CDCl}_3$ )  $\delta$  7.72 (d,  $J = 8.3$  Hz, 2H), 7.34 (d,  $J = 8.0$  Hz, 2H), 4.94 (d,  $J = 19.7$  Hz, 2H), 3.72 (s, 2H), 3.48 – 3.42 (m, 2H), 3.42 – 3.37 (m, 2H), 2.46 (s, 3H), 1.75 (s, 3H).  $^{13}\text{C}$  NMR (101 MHz,  $\text{CDCl}_3$ )  $\delta$  143.70, 140.48, 136.11, 129.84, 127.19, 115.40, 55.88, 49.55, 28.95, 21.56, 19.76.

**5 Activity and stability of UiO-68[Au1] for photo-induced [2+2] styrene(1a) cycloaddition.**

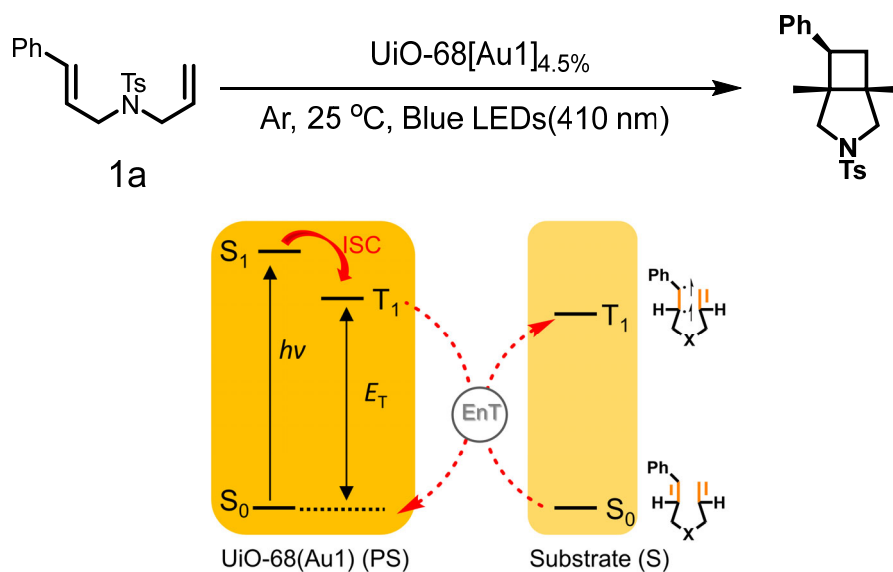

**Fig. S21.** Sensitization through triplet energy transfer from a sensitizer (left) to a substrate (right).<sup>11</sup>

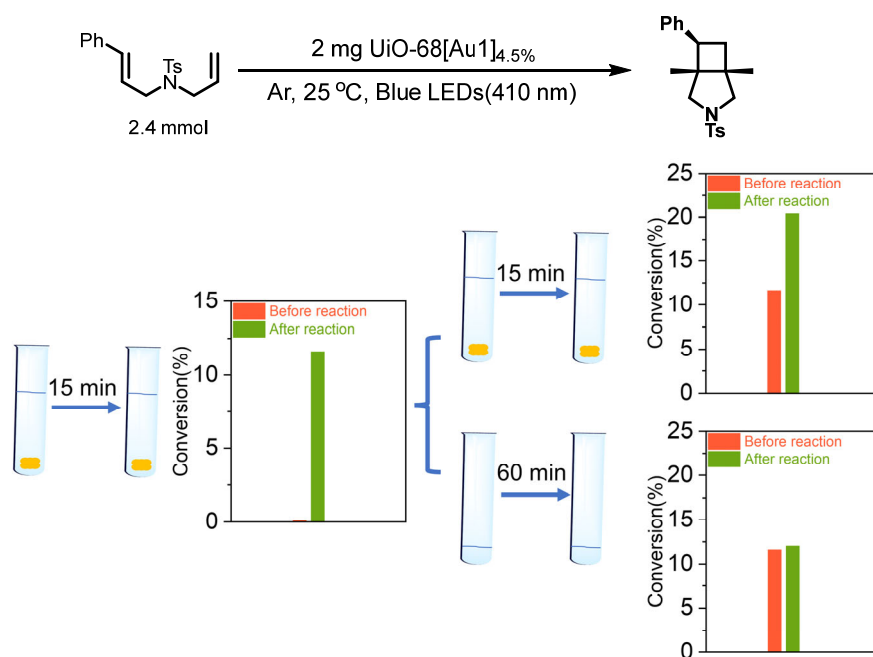

**Fig. S22.** Schematic representation of the leaching experiment.

**Table S4.** Evaluation of reaction conditions for visible-light-driven [2+2] cycloaddition reaction of **1a**.

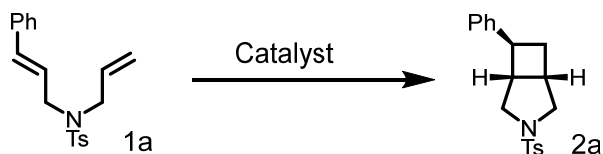

| Entry | Catalyst                                                  | Condition                  | Yield (%)          |
|-------|-----------------------------------------------------------|----------------------------|--------------------|
| 1     | UiO-68[Au1] <sub>4.5%</sub>                               | argon, MeCN                | 95 <sup>d</sup>    |
| 2     | UiO-68[Au1] <sub>4.5%</sub>                               | argon, THF                 | 95 <sup>d</sup>    |
| 3     | UiO-68[Au1] <sub>4.5%</sub>                               | air, MeCN                  | 88 <sup>d</sup>    |
| 4     | UiO-68[Au1] <sub>4.5%</sub>                               | argon, lack of light, MeCN | trace <sup>d</sup> |
| 5     | UiO-68[Au1] <sub>4.5%</sub>                               | argon, MeCN                | 85 <sup>c</sup>    |
| 6     | UiO-68[Au1] <sub>4.5%</sub>                               | argon, MeCN                | 96 <sup>c</sup>    |
| 7     | [Au(C <sup>^</sup> N <sup>^</sup> C)(NHC)]PF <sub>6</sub> | argon, MeCN                | 96                 |
| 8     | [Au(C <sup>^</sup> N <sup>^</sup> C)(NHC)]PF <sub>6</sub> | argon, THF                 | 95                 |
| 9     | UiO-68-Me                                                 | argon, MeCN                | trace              |
| 10    | No Catalyst                                               | argon, MeCN                | trace              |
| 11    | UiO-68[Au2] <sub>2.6%</sub>                               | argon, MeCN                | 92 <sup>b</sup>    |
| 12    | Ir[(dFppy) <sub>2</sub> dtbbpy]PF <sub>6</sub>            | argon, MeCN                | 96 <sup>a</sup>    |
| 13    | Thioxanthone                                              | argon, MeCN                | 95 <sup>a</sup>    |

Reaction conditions: **1a** (0.1 mmol), UiO-68[Au1]<sub>4.5%</sub> (0.5–2 mol%)/UiO-68[Au2]<sub>2.6%</sub> (1.8 mol%)/UiO-68-Me (5 mg)/[Au(C<sup>^</sup>N<sup>^</sup>C)(NHC)]PF<sub>6</sub> (1.5 mol%)/Ir[(dFppy)<sub>2</sub>dtbbpy]PF<sub>6</sub> (1 mol%)/thioxanthone (1 mol%), MeCN/THF (2 mL), 25°C, 410 nm LED irradiation, 15 min/2 h<sup>a</sup>/30 h<sup>b</sup>; 0.5 mol%<sup>c</sup>, 1 mol%<sup>d</sup> or 2 mol%<sup>c</sup> of UiO-68[Au1]<sub>4.5%</sub> was used. Yields were determined by <sup>1</sup>H NMR analysis of the unpurified reaction mixture using chlorodiphenylmethane as an internal standard.

**Table S5.** ICP-MS results of UiO-68[Au1]<sub>4.5%</sub> before and after [2+2] styrene (**1a**) cycloaddition reaction.

| MOF                                                               | Zr(wt%) | Au(wt%) | Zr (mol %):Au(mol %) |
|-------------------------------------------------------------------|---------|---------|----------------------|
| UiO-68[Au1] <sub>4.5%</sub>                                       | 13.1%   | 4.5%    | 6.3:1                |
| recycled UiO-68[Au1] <sub>4.5%</sub><br>(after ten reaction runs) | 14.6%   | 4.3%    | 7.3:1                |

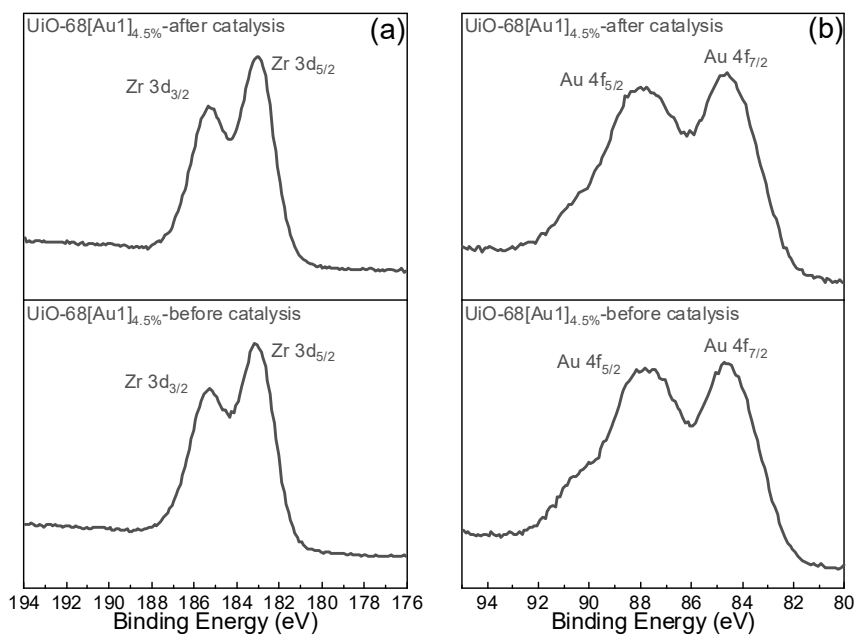

**Fig. S23.** XPS spectra of the Zr 3d (a) and the Au 4f (b) photoelectron peaks in the freshly prepared UiO-68[Au1]<sub>4.5%</sub> and the recycled UiO-68[Au1]<sub>4.5%</sub> (used in the [2+2] styrene (**1a**) cycloaddition reaction for ten runs). Referenced to C(1s) at 284.7 eV.

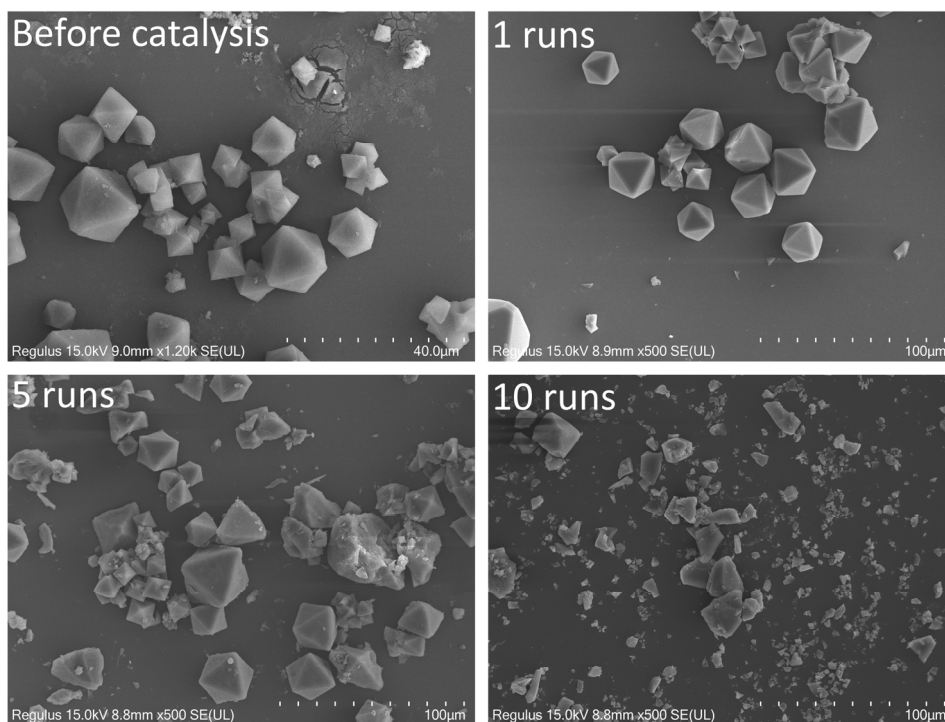

**Fig. S24.** SEM images of UiO-68[Au1]<sub>4.5%</sub> before and after the [2+2] styrene (**1a**) cycloaddition reaction.



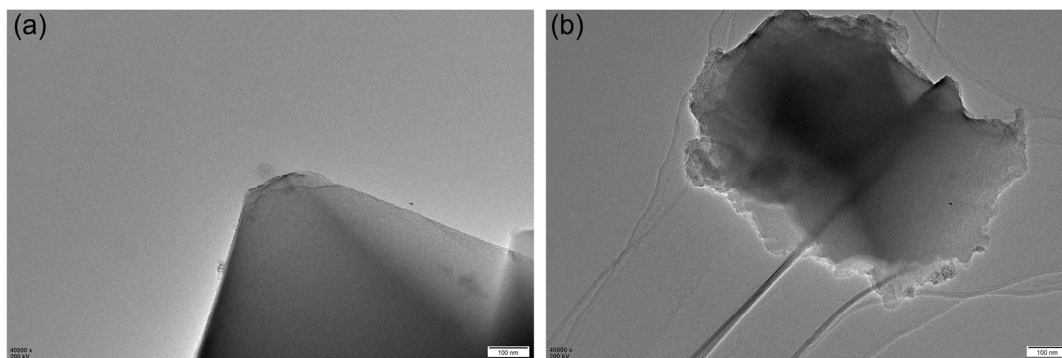

**Fig. S25.** TEM images of UiO-68[Au1]<sub>4.5%</sub> before (a) and after (b) the [2+2] styrene (**1a**) cycloaddition reaction (10 reaction runs).

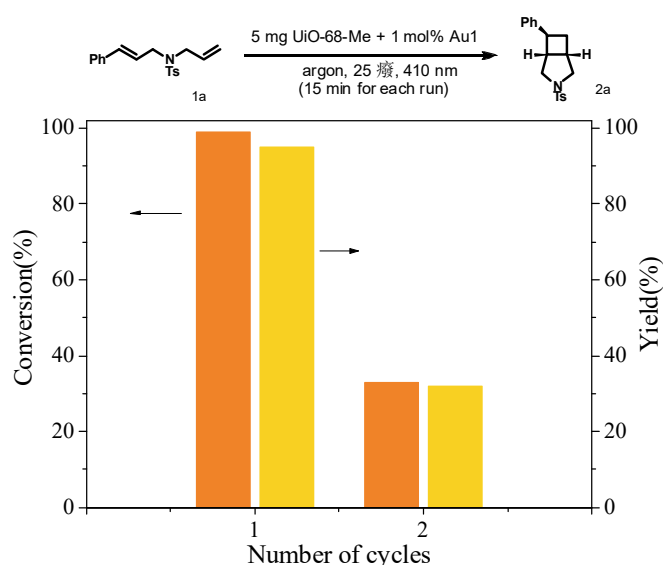

**Fig. S26.** Substrate conversion and product yields in recycling experiments with two reaction runs using the physically mixed system (UiO-68-Me and Au1) as the photocatalyst in the given reaction.

## 6 General procedure E for visible-light-driven [2+2] styrene cycloaddition

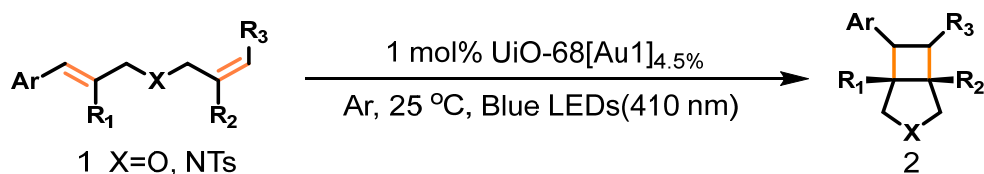

Diallyl ethers or *N*-tosylamides (**1**, 0.1 mmol) and UiO-68[Au1]<sub>4.5%</sub> (1 mol%) were weighed and transferred into a 10 mL reaction tube equipped with a stir bar. 2 mL of

dry MeCN was added to the tube. The reaction mixture was degassed by bubbling argon and then stirred at room temperature under irradiation from a 410 nm LED with cooling by running water. After the indicated reaction time, the tube was opened and chlorodiphenylmethane (0.1 mmol) was added as an internal standard. Diastereomer ratios and yields were determined using  $^1\text{H}$  NMR spectroscopy. The mixture was purified by column chromatography on silica gel (eluent: EA/PE) to afford the pure product **2**. **UiO-68[Au1]<sub>4.5%</sub>** was recovered by washing with MeCN several times. The recovered MOF catalyst was then used in subsequent reactions for cycle tests, with fresh substrates added.

#### 6-Phenyl-3-tosyl-3-azabicyclo[3.2.0]heptane (**2a**)<sup>5</sup>

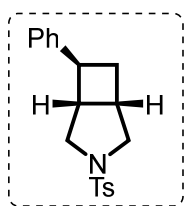

The synthesis followed the general procedure E with the use of **1a** as the starting material. The reaction time was 15 min, with d.r. of 6:1 and a yield of 95%.

Diastereomer (major product):  $^1\text{H}$  NMR (600 MHz,  $\text{CDCl}_3$ )  $\delta$  7.73 (d,  $J = 8.2$  Hz, 2H), 7.34 (d,  $J = 8.0$  Hz, 2H), 7.31 (t,  $J = 7.7$  Hz, 2H), 7.22 – 7.16 (m, 3H), 3.60 (d,  $J = 9.8$  Hz, 1H), 3.54 (d,  $J = 9.7$  Hz, 1H), 3.42 – 3.36 (m, 1H), 2.91 – 2.81 (m, 2H), 2.75 (dd,  $J = 9.8, 6.5$  Hz, 1H), 2.67 (dd,  $J = 9.8, 5.4$  Hz, 1H), 2.44 (s, 3H), 2.38 – 2.24 (m, 2H).  $^{13}\text{C}$  NMR (151 MHz,  $\text{CDCl}_3$ )  $\delta$  145.34, 143.60, 132.04, 129.55, 128.51, 128.11, 126.36, 126.15, 54.50, 54.37, 45.68, 41.94, 34.09, 31.77, 21.54.

#### 6-Phenyl-3-oxabicyclo[3.2.0]heptane (**2b**)<sup>5</sup>

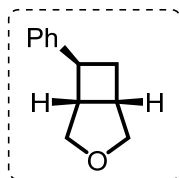

The synthesis followed the general procedure E with the use of **1b** as the starting material. The reaction time was 1 h, with d.r. of 5:1 and a yield of 95%.

Diastereomer (major product):  $^1\text{H}$  NMR (600 MHz,  $\text{CDCl}_3$ )  $\delta$  7.32 (t,  $J = 7.7$  Hz, 2H), 7.26 (d,  $J = 8.2$  Hz, 2H), 7.19 (td,  $J = 7.2, 1.4$  Hz, 1H), 3.99 (t,  $J = 10.0$  Hz, 2H), 3.62 (dd,  $J = 9.2, 5.8$  Hz, 1H), 3.52 (dd,  $J = 9.3, 4.8$  Hz, 1H), 3.29 – 3.20 (m, 1H), 3.05 – 2.99 (m, 1H), 2.99 – 2.93 (m, 1H), 2.34 – 2.27 (m, 1H), 2.17 (ddd,  $J = 12.9, 9.5, 4.0$  Hz, 1H).  $^{13}\text{C}$  NMR (151 MHz,  $\text{CDCl}_3$ )  $\delta$  146.09, 128.43, 126.41, 125.94, 74.48, 74.02, 47.24, 41.96, 35.33, 31.83.

#### 6,7-Diphenyl-3-oxabicyclo[3.2.0]heptane (**2c**)<sup>5</sup>

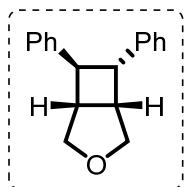

The synthesis followed the general procedure E with the use of **1c** as the starting material. The reaction time was 1 h, with d.r. of 3:1 and a yield of 96%.

Diastereomer (major product):  $^1\text{H}$  NMR (500 MHz,  $\text{CDCl}_3$ )  $\delta$  7.36 – 7.28 (m, 4H), 7.28 – 7.24 (m, 4H), 7.24 – 7.18 (m, 2H), 4.04 (d,  $J = 9.1$  Hz, 1H), 3.87 – 3.78 (m, 2H), 3.67 (dd,  $J = 9.7, 6.7$  Hz, 1H), 3.54 (dd,  $J = 9.1, 4.1$  Hz, 1H), 3.49 (dd,  $J = 10.0, 6.9$  Hz, 1H), 3.26 (q,  $J = 7.7$  Hz, 1H), 3.13 (td,  $J = 7.0, 4.1$  Hz, 1H).  $^{13}\text{C}$  NMR (126 MHz,  $\text{CDCl}_3$ )  $\delta$  144.45, 140.33, 128.49, 128.46, 127.78, 126.47, 126.32, 126.26, 72.98, 68.44, 45.91, 45.57, 44.16, 40.74.

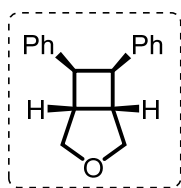

Diastereomer (minor product):  $^1\text{H}$  NMR (500 MHz,  $\text{CDCl}_3$ )  $\delta$  7.11 – 7.04 (m, 4H), 7.03 – 6.96 (m, 2H), 6.96 – 6.90 (m, 4H), 4.10 (d,  $J = 9.5$  Hz, 2H), 3.75 (d,  $J = 4.2$  Hz, 2H), 3.72 (dd,  $J = 3.4, 1.7$  Hz, 1H), 3.70 (dd,  $J = 3.4, 1.8$  Hz, 1H), 3.37 – 3.25 (m, 2H).  $^{13}\text{C}$  NMR (126 MHz,  $\text{CDCl}_3$ )  $\delta$  140.80, 128.12, 127.72, 125.63, 74.03, 47.19, 42.13.

#### 1-Methyl-6,7-diphenyl-3-oxabicyclo[3.2.0]heptane (**2d**)

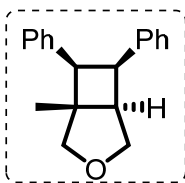

The synthesis followed the general procedure E with the use of **1d** as the starting material. The reaction time was 1 h, with d.r. of 1.1:1 and a yield of 84%.

Diastereomer (major product):  $^1\text{H}$  NMR (600 MHz,  $\text{CDCl}_3$ )  $\delta$  7.35 – 7.30 (m, 2H), 7.30 – 7.28 (m, 2H), 7.27 – 7.24 (m, 4H), 7.24 – 7.17 (m, 2H), 4.00 (d,  $J = 9.2$  Hz, 1H), 3.76 (d,  $J = 9.7$  Hz, 1H), 3.68 (dd,  $J = 9.2, 4.1$  Hz, 1H), 3.61 (dd,  $J = 9.7, 6.6$  Hz, 1H), 3.50 (d,  $J = 9.7$  Hz, 1H), 3.12 (d,  $J = 9.7$  Hz, 1H), 2.66 (dd,  $J = 6.6, 4.0$  Hz, 1H), 1.45 (s, 3H).  $^{13}\text{C}$  NMR (151 MHz,  $\text{CDCl}_3$ )  $\delta$  144.59, 140.20, 128.49, 128.49, 127.56, 126.55, 126.46, 126.19, 74.46, 72.73, 53.79, 50.99, 47.68, 42.76, 24.67. HRMS (ESI) Calcd for  $[\text{C}_{19}\text{H}_{20}\text{O} + \text{Na}]^+$ : 287.1406, found: 287.1405.

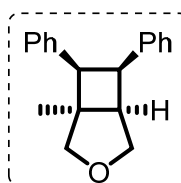

Diastereomer (minor product):  $^1\text{H}$  NMR (600 MHz,  $\text{CDCl}_3$ )  $\delta$  7.17 (t,  $J = 7.6$  Hz, 2H), 7.12 – 7.07 (m, 1H), 7.06 – 7.02 (m, 3H), 6.95 (d,  $J = 8.3$  Hz, 2H), 6.80 – 6.76 (m, 2H), 4.14 (d,  $J = 9.1$  Hz, 1H), 4.04 (d,  $J = 9.1$  Hz, 1H), 3.93 (dd,  $J = 10.2, 6.8$  Hz, 1H), 3.86 (dd,  $J = 9.4, 4.5$  Hz, 2H), 3.51 (d,  $J = 9.0$  Hz, 1H), 3.13 – 3.05 (m, 1H), 0.94 (s, 3H).  $^{13}\text{C}$  NMR (151 MHz,  $\text{CDCl}_3$ )  $\delta$  140.49, 138.95, 130.52, 127.89, 127.60, 127.24, 125.77, 125.48, 82.00, 51.92, 48.25, 47.29, 43.06, 18.97. HRMS (ESI) Calcd for  $[\text{C}_{19}\text{H}_{20}\text{O} + \text{Na}]^+$ : 287.1406, found: 287.1403.

#### 6,6-Dimethyl-7-phenyl-3-oxabicyclo[3.2.0]heptane (**2e**)<sup>5</sup>

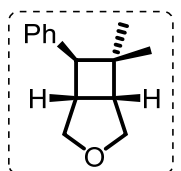

The synthesis followed the general procedure E with the use of **1e** as the starting material. The reaction time was 1 h, with d.r. > 10:1 and a yield of 87%.

Diastereomer (major product):  $^1\text{H}$  NMR (600 MHz,  $\text{CDCl}_3$ )  $\delta$  7.30 (t,  $J = 7.6$  Hz, 2H), 7.20 (t,  $J = 7.5$  Hz, 1H), 7.14 (d,  $J = 7.5$  Hz, 2H), 4.17 (d,  $J = 10.0$  Hz, 1H), 3.79 (d,  $J = 9.0$  Hz, 1H), 3.51 (dd,  $J = 10.1, 6.7$  Hz, 1H), 3.44 (dd,  $J = 9.0, 4.5$  Hz, 1H), 3.27 (td,  $J = 7.7, 4.5$  Hz, 1H), 2.99 (d,  $J = 7.3$  Hz, 1H), 2.40 (t,  $J = 7.4$  Hz, 1H), 1.11 (s, 3H), 0.74 (s, 3H).  $^{13}\text{C}$  NMR (151 MHz,  $\text{CDCl}_3$ )  $\delta$  140.63, 128.00, 127.65, 125.92, 72.09, 69.13, 51.93, 46.62, 38.01, 37.28, 26.22, 24.24.

#### 3-Phenyl-8-hydroxy-2H-cyclobuta[cd]benzofuran (**2f**)<sup>6</sup>

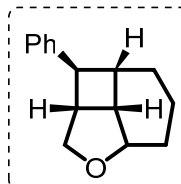

The synthesis followed the general procedure E with the use of **1f** as the starting material. The reaction time was 1 h, with d.r. > 10:1 and a yield of 96%.

Diastereomer (major product):  $^1\text{H}$  NMR (600 MHz,  $\text{CDCl}_3$ )  $\delta$  7.30 (t,  $J = 7.5$  Hz, 2H), 7.22 (d,  $J = 7.6$  Hz, 2H), 7.19 (t,  $J = 7.3$  Hz, 1H), 4.03 (dd,  $J = 6.9, 3.2$  Hz, 1H), 3.95 (d,  $J = 9.1$  Hz, 1H), 3.58 (dd,  $J = 9.1, 3.8$  Hz, 1H), 3.25 (t,  $J = 7.9$  Hz, 1H), 2.96 – 2.89 (m, 1H), 2.67 (q,  $J = 7.7$  Hz, 1H), 2.51 (q,  $J = 8.3$

Hz, 1H), 2.09 (dd,  $J = 14.6, 3.3$  Hz, 1H), 1.98 (qt,  $J = 15.9, 4.7$  Hz, 1H), 1.59 (d,  $J = 14.4$  Hz, 1H), 1.54 – 1.33 (m, 3H).  $^{13}\text{C}$  NMR (151 MHz,  $\text{CDCl}_3$ )  $\delta$  145.31, 128.37, 126.65, 125.94, 75.57, 72.81, 45.22, 43.57, 35.25, 35.03, 27.44, 25.82, 14.74.

#### 6,6-dimethyl-7-(4-nitrophenyl)-3-oxabicyclo[3.2.0]heptane (**2g**)<sup>5</sup>

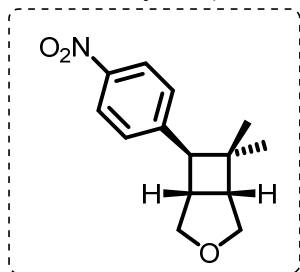

The synthesis followed the general procedure E with the use of **1g** as the starting material. The reaction time was 1 h, with d.r. > 10:1 and a yield of 85%.

Diastereomer (major product):  $^1\text{H}$  NMR (600 MHz, Chloroform-*d*)  $\delta$  8.17 (d,  $J = 8.7$  Hz, 2H), 7.28 (d,  $J = 8.4$  Hz, 2H), 4.19 (d,  $J = 10.2$  Hz, 1H), 3.81 (d,  $J = 9.2$  Hz, 1H), 3.53 (dd,  $J = 10.2, 6.6$  Hz, 1H), 3.47 (dd,  $J = 9.2, 4.4$  Hz, 1H), 3.31 (td,  $J = 7.7, 4.4$  Hz, 1H), 3.10 (d,  $J = 7.3$  Hz, 1H), 2.46 (t,  $J = 7.4$  Hz, 1H), 1.15 (s, 3H), 0.74 (s, 3H).  $^{13}\text{C}$  NMR (151 MHz, Chloroform-*d*)  $\delta$  148.64, 146.36, 128.23, 123.37, 71.87, 69.06, 51.86, 46.62, 37.99, 26.24, 24.24.

#### (*Z*)-(2-methyl-3-((2-methylallyl)oxy)prop-1-en-1-yl)benzene (**Z**)-1h

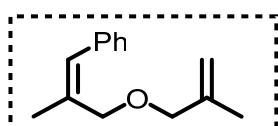

The synthesis followed the general procedure E with the use of **1h** as the starting material. The reaction time was 1 h, with a yield of 50%.  $^1\text{H}$  NMR (400 MHz, Chloroform-*d*)  $\delta$  7.31 (m, 2H), 7.25 – 7.16 (m, 2H), 6.52 (s, 1H), 4.92 (s, 1H), 4.86 (s, 1H), 4.06 (s, 2H), 3.84 (s, 2H), 1.98 (s, 3H), 1.74 (s, 3H).

## 7 General procedure F for visible-light-driven [2+2] cycloaddition

### reaction between imines and alkenes

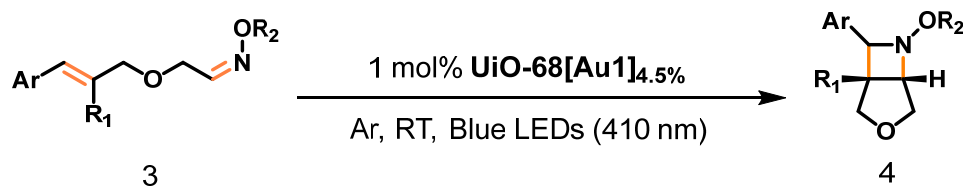

Substrate (**3**, 0.1 mmol) and **UiO-68[Au1]<sub>4.5%</sub>** (1 mol%) were weighed and added to a 10 mL reaction tube equipped with a stir bar. 2 mL of MeCN was added to the tube. The reaction mixture was degassed by bubbling argon and then stirred at room temperature under irradiation from a 410 nm LED with cooling by running water. After the indicated reaction time, the tube was opened and chlorodiphenylmethane (0.1 mmol) was added as an internal standard. Diastereomer ratios and yields were determined using  $^1\text{H}$  NMR spectroscopy. The mixture was purified by column chromatography on silica gel (eluent: EA/PE) to afford the pure product **4**.

#### 6-Methoxy-7-phenyl-3-oxa-6-azabicyclo[3.2.0]heptane (**4a**)<sup>7</sup>

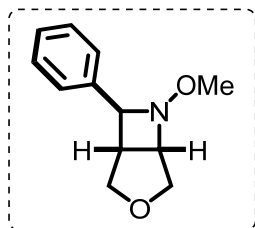

The synthesis followed the general procedure F with the use of **3a** as the starting material. The reaction time was 0.5 h, with d.r. > 20:1 and a yield of 98%.

<sup>1</sup>H NMR (400 MHz, CDCl<sub>3</sub>) δ 7.44 (d, *J* = 6.9 Hz, 2H), 7.38 (t, *J* = 7.5 Hz, 2H), 7.34 – 7.27 (m, 1H), 4.77 (d, *J* = 10.7 Hz, 1H), 4.55 (t, *J* = 5.6 Hz, 1H), 4.43 (d, *J* = 5.9 Hz, 1H), 3.98 (d, *J* = 9.4 Hz, 1H), 3.59 (dd, *J* = 10.6, 5.3 Hz, 1H), 3.55 – 3.51 (m, 1H), 3.46 (s, 3H), 2.73 (td, *J* = 5.9, 3.6 Hz, 1H). <sup>13</sup>C NMR (101 MHz, CDCl<sub>3</sub>) δ 141.82, 128.46, 127.45, 126.29, 73.74, 70.67, 67.34, 67.04, 60.49, 42.03.

#### 6-(Benzyloxy)-7-phenyl-3-oxa-6-azabicyclo[3.2.0]heptane (**4b**)<sup>7</sup>

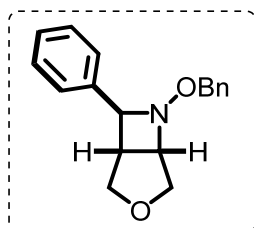

The synthesis followed the general procedure F with the use of **3b** as the starting material. The reaction time was 0.5 h, with d.r. > 20:1 and a yield of 97%.

<sup>1</sup>H NMR (400 MHz, CDCl<sub>3</sub>) δ 7.42 – 7.38 (m, 2H), 7.38 – 7.33 (m, 2H), 7.33 – 7.25 (m, 6H), 4.79 (d, *J* = 10.6 Hz, 1H), 4.65 (s, 2H), 4.51 (d, *J* = 5.8 Hz, 1H), 4.33 (t, *J* = 5.6 Hz, 1H), 3.98 (d, *J* = 9.4 Hz, 1H), 3.55 – 3.45 (m, 2H), 2.68 (td, *J* = 5.9, 3.5 Hz, 1H). <sup>13</sup>C NMR (101 MHz, CDCl<sub>3</sub>) δ 141.73, 138.24, 128.51, 128.38, 128.18, 127.60, 127.37, 126.38, 75.47, 73.98, 70.69, 68.38, 67.43, 42.49.

#### 7-Phenyl-3-oxa-6-azabicyclo[3.2.0]heptan-6-ol (**4c**)<sup>7</sup>

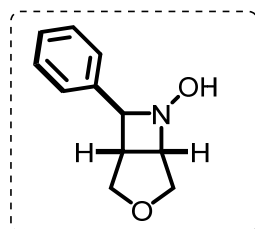

The synthesis followed the general procedure F with the use of **3c** as the starting material. The reaction time was 2 h, with d.r. > 20:1 and a yield of 91%.

<sup>1</sup>H NMR (400 MHz, CDCl<sub>3</sub>) δ 7.37 – 7.31 (m, 4H), 7.30 – 7.26 (m, 1H), 4.81 (d, *J* = 10.8 Hz, 1H), 4.36 (d, *J* = 4.7 Hz, 1H), 4.34 (t, *J* = 5.6 Hz, 1H), 3.93 (d, *J* = 9.4 Hz, 1H), 3.52 – 3.45 (m, 2H), 2.75 (td, *J* = 5.9, 3.5 Hz, 1H). <sup>13</sup>C NMR (151 MHz, CDCl<sub>3</sub>) δ 140.85, 128.51, 127.75, 126.76, 75.35, 70.63, 69.03, 66.68, 41.73.

#### 6-Methoxy-1-methyl-7-phenyl-3-oxa-6-azabicyclo[3.2.0]heptane (**4d**)<sup>7</sup>

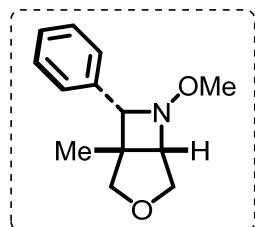

The synthesis followed the general procedure F with the use of **3d** as the starting material. The reaction time was 0.5 h, with d.r. of 1.3:1 and a yield of 98%.

<sup>1</sup>H NMR (600 MHz, CDCl<sub>3</sub>) δ 7.41 (d, *J* = 7.5 Hz, 2H), 7.36 (t, *J* = 7.5 Hz, 2H), 7.28 (d, *J* = 7.2 Hz, 1H), 4.48 (s, 1H), 4.11 (d, *J* = 9.8 Hz, 1H), 3.83 (d, *J* = 2.6 Hz, 1H), 3.54 – 3.50 (m, 5H), 2.98 (d, *J* = 9.8 Hz, 1H), 1.44 (s, 3H). <sup>13</sup>C NMR (151 MHz, CDCl<sub>3</sub>) δ 138.59, 128.39, 127.36, 126.66, 77.50, 77.09, 72.82, 72.38, 61.62, 44.86, 22.53.

### 7-(4-Bromophenyl)-6-methoxy-3-oxa-6-azabicyclo[3.2.0]heptane (**4e**)<sup>7</sup>

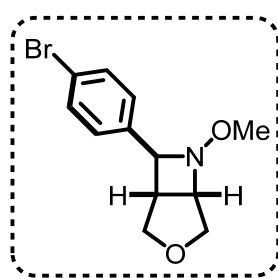

The synthesis followed the general procedure F with the use of **3e** as the starting material. The reaction time was 0.5 h, with d.r. >20:1 and a yield of 93%.

<sup>1</sup>H NMR (600 MHz, CDCl<sub>3</sub>) δ 7.48 (d, *J* = 8.2 Hz, 2H), 7.29 (d, *J* = 8.2 Hz, 2H), 4.73 (d, *J* = 10.6 Hz, 1H), 4.51 (t, *J* = 5.5 Hz, 1H), 4.34 (d, *J* = 5.7 Hz, 1H), 3.94 (d, *J* = 9.5 Hz, 1H), 3.55 (dd, *J* = 10.6, 5.3 Hz, 1H), 3.49 (dd, *J* = 9.5, 3.5 Hz, 1H), 3.41 (s, 3H), 2.65 (td, *J* = 5.8, 3.6 Hz, 1H). <sup>13</sup>C NMR (151 MHz, CDCl<sub>3</sub>) δ 140.86, 131.55, 128.05, 121.29, 73.06, 70.54, 67.36, 66.98, 60.54, 42.09.

### *Tert*-butyl-7-phenyl-3-oxa-6-azabicyclo[3.2.0]heptan-6-yl)carbamate (**4f**)<sup>7</sup>

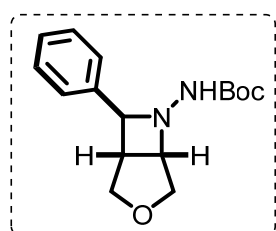

The synthesis followed the general procedure F with the use of **3f** as the starting material. The reaction time was 1 h, with d.r. of 5.6:1 and a yield of 83%.

<sup>1</sup>H NMR (600 MHz, CDCl<sub>3</sub>) δ 7.53 (d, *J* = 7.5 Hz, 2H), 7.39 (t, *J* = 7.6 Hz, 2H), 7.30 (t, *J* = 8.4 Hz, 1H), 5.92 (s, 1H), 4.65 – 4.61 (m, 1H), 4.51 (d, *J* = 11.5 Hz, 1H), 4.25 (d, *J* = 4.8 Hz, 1H), 4.06 (d, *J* = 9.5 Hz, 1H), 3.53 (dd, *J* = 9.5, 4.0 Hz, 1H), 3.50 (dd, *J* = 11.5, 4.1 Hz, 1H), 2.78 (q, *J* = 4.9 Hz, 1H), 1.44 (s, 9H). <sup>13</sup>C NMR (151 MHz, CDCl<sub>3</sub>) δ 141.42, 128.46, 127.34, 125.83, 80.17, 71.74, 68.54, 67.40, 43.07, 28.29.

## 8 General procedure G for visible-light-driven [2+2] intermolecular cycloaddition reactions.

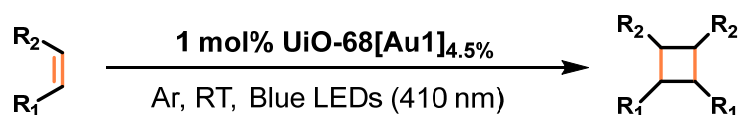

Substrate (0.2 mmol) and **UiO-68[Au1]<sub>4.5%</sub>** (1 mol%) were weighed and added to a 10 mL reaction tube equipped with a stir bar. 2 mL of MeCN was added to the tube. The reaction mixture was degassed by bubbling argon and then stirred at room temperature under irradiation from a 410 nm LED with cooling by running water. After the indicated reaction time, the tube was opened and chlorodiphenylmethane (0.1 mmol) was added as an internal standard. Diastereomer ratios and yields were determined using <sup>1</sup>H NMR spectroscopy. The mixture was purified by column chromatography on silica gel (eluent: EA/PE) to afford the pure product.

### Diethyl-3,4-diphenylcyclobutane-1,2-dicarboxylate (**7a**)<sup>12</sup>

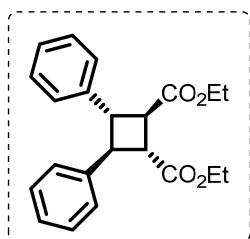

Synthesized from ethyl cinnamate. Reaction time: 30 h, d.r. 10 : 1, conversion: 87%, yield: 68%.

<sup>1</sup>H NMR (400 MHz, CDCl<sub>3</sub>) δ 7.39 – 7.19 (m, 10H), 4.20 (q, *J* = 7.1 Hz, 4H), 3.79 – 3.72 (m, 2H), 3.48 – 3.42 (m, 2H), 1.26 (t, *J* = 7.1 Hz, 6H). <sup>13</sup>C NMR (101 MHz, CDCl<sub>3</sub>) δ 172.60, 141.20, 128.62, 127.08, 126.86, 61.03, 47.00, 44.86, 14.26.

### 1,2-Di(naphthalen-2-yl)cyclobutene (**7b**)<sup>13</sup>

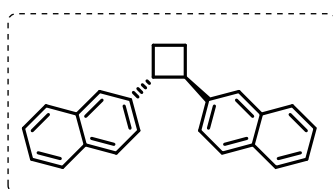

Synthesized from 2-vinylnaphthalene. Reaction time: 16 h, d.r. 5 : 1, conversion: 99%, yield: 43%.

<sup>1</sup>H NMR (400 MHz, CDCl<sub>3</sub>) δ 7.85 – 7.77 (m, 6H), 7.71 (s, 2H), 7.51 – 7.39 (m, 6H), 3.92 – 3.78 (m, 2H), 2.54 – 2.41 (m, 2H), 2.40 – 2.28 (m, 2H). <sup>13</sup>C NMR (101 MHz, CDCl<sub>3</sub>) δ 142.02, 133.53, 132.24, 127.98, 127.66, 127.62, 125.97, 125.53, 125.27, 124.71, 48.19, 25.94.

### Tetrahydrocyclobuta[1,2-a:3,4-a']diacenaphthylene (**7c**)<sup>14</sup>

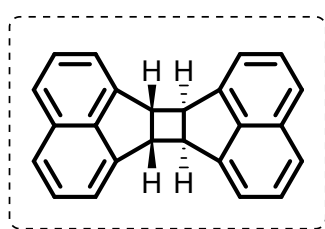

Synthesized from acenaphthylene. Reaction time: 1 h, d.r. 1.2 : 1, conversion: 99%, yield: 98%.

<sup>1</sup>H NMR (600 MHz, CDCl<sub>3</sub>) δ 7.74 (d, *J* = 8.1 Hz, 4H), 7.62 – 7.58 (m, 4H), 7.52 (d, *J* = 6.8 Hz, 4H), 4.09 (s, 4H). <sup>13</sup>C NMR (151 MHz, CDCl<sub>3</sub>) δ 147.66, 139.57, 132.12, 128.38, 123.18, 119.24, 52.51.

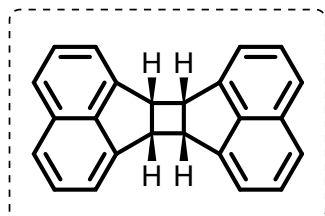

<sup>1</sup>H NMR (600 MHz, CDCl<sub>3</sub>) δ 7.18 (d, *J* = 8.1 Hz, 4H), 7.13 (t, *J* = 7.5 Hz, 4H), 7.01 (d, *J* = 6.7 Hz, 4H), 4.83 (s, 4H). <sup>13</sup>C NMR (151 MHz, CDCl<sub>3</sub>) δ 144.62, 141.73, 130.95, 126.94, 122.16, 120.27, 47.30.

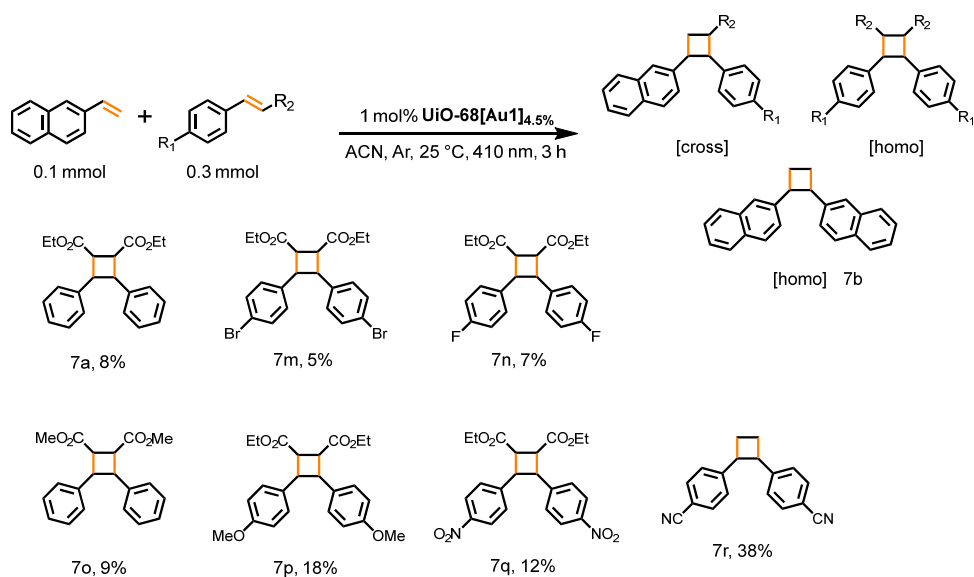

2-Vinylnaphthalene (0.1 mmol), cinnamate (or other substituted styrenes, 0.3 mmol) and **UiO-68[Au1]**<sub>4.5%</sub> (1 mol%) were weighted and added to a 10 mL reaction tube equipped with a stir bar. 2 mL of MeCN was added to the tube. The reaction mixture was degassed by bubbling argon and then stirred at room temperature under irradiation from a 410 nm LED with cooling by running water. After the indicated reaction time, the tube was opened and chlorodiphenylmethane (0.1 mmol) was added as an internal standard. Diastereomer ratios and yields were determined using <sup>1</sup>H NMR spectroscopy. The mixture was purified by column chromatography on silica gel (eluent: EA/PE) to afford the pure product.

#### Ethyl-3-(naphthalen-2-yl)-2-phenylcyclobutane-1-carboxylate (**7d**)<sup>15</sup>

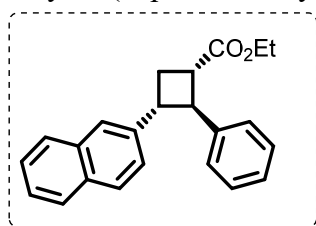

Synthesized from 2-vinylnaphthalene and ethyl cinnamate.

Reaction time: 3 h, d.r. 1.8:1, conversion: 99%, yield: 76%.

Diastereomer (major product): <sup>1</sup>H NMR (600 MHz, CDCl<sub>3</sub>) δ 7.79 (m, 3H), 7.71 (s, 1H), 7.48 – 7.40 (m, 3H), 7.33 – 7.26 (m, 4H), 7.24 – 7.20 (m, 1H), 4.20 (q, *J* = 7.1 Hz, 2H), 3.97 (t, *J* = 9.7 Hz, 1H), 3.69 (q, *J* = 9.6 Hz, 1H), 3.24 (q, *J* = 9.3

Hz, 1H), 2.70 (dt, *J* = 10.7, 8.3 Hz, 1H), 2.51 (q, *J* = 10.3 Hz, 1H), 1.29 (t, *J* = 7.1 Hz, 3H). <sup>13</sup>C NMR (151 MHz, CDCl<sub>3</sub>) δ 174.20, 142.24, 140.69, 133.46, 132.42, 128.50, 128.20, 127.69, 127.64, 126.69, 126.64, 126.10, 125.51, 125.41, 125.20, 60.67, 50.67, 43.67, 41.76, 29.68, 14.32. HRMS (ESI) Calcd for [C<sub>23</sub>H<sub>22</sub>O<sub>2</sub> + Na]<sup>+</sup>: 353.1512, found: 353.1516.

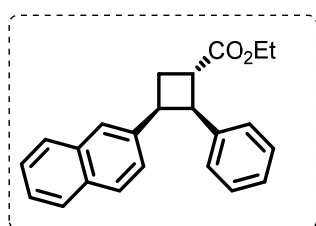

Diastereomer (minor product): <sup>1</sup>H NMR (600 MHz, CDCl<sub>3</sub>) δ 7.73 (dd, *J* = 17.5, 8.0 Hz, 2H), 7.58 (s, 1H), 7.55 (d, *J* = 8.5 Hz, 1H), 7.42 (m, 2H), 7.06 (t, *J* = 7.6 Hz, 2H), 7.03 – 6.94 (m, 4H), 4.39 (t, *J* = 9.2 Hz, 1H), 4.24 (t, *J* = 6.9 Hz, 2H), 4.28 – 4.16 (m, 1H), 3.78 (q, *J* = 8.9 Hz, 1H), 2.91 (dt, *J* = 12.0, 8.7 Hz, 1H), 2.79 – 2.71 (m, 1H), 1.32 (t, *J* = 7.1

Hz, 3H). <sup>13</sup>C NMR (151 MHz, CDCl<sub>3</sub>) δ 174.78, 139.26, 138.21, 133.23, 131.93, 127.83, 127.61, 127.59, 127.48, 127.34, 127.16, 126.07, 125.92, 125.73, 125.23, 60.71, 47.49, 42.38, 41.12, 27.29, 14.30. HRMS (ESI) Calcd for [C<sub>23</sub>H<sub>22</sub>O<sub>2</sub> + Na]<sup>+</sup>: 353.1512, found: 353.1516.

#### Ethyl-2-(4-bromophenyl)-3-(naphthalen-2-yl)cyclobutane-1-carboxylate (**7e**)

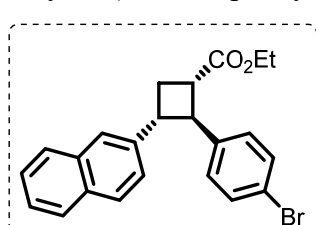

Synthesized from 2-vinylnaphthalene and ethyl (*E*)-3-(4-bromophenyl)acrylate. Reaction time: 3 h, d.r. 1.6:1, conversion: 99%, yield: 74%.

Diastereomer (major product): <sup>1</sup>H NMR (400 MHz, CDCl<sub>3</sub>) δ 7.80 (m, 3H), 7.68 (s, 1H), 7.51 – 7.35 (m, 5H), 7.15 (d, *J* = 8.4 Hz, 2H), 4.20 (q, *J* = 7.1 Hz, 2H), 3.89 (t, *J* = 9.8 Hz,

1H), 3.69 – 3.57 (m, 1H), 3.20 (q, *J* = 9.8, 8.2 Hz, 1H), 2.70 (dt, *J* = 10.8, 8.2 Hz, 1H), 2.51 (q, *J* = 10.4 Hz, 1H), 1.29 (t, *J* = 7.1 Hz, 3H). <sup>13</sup>C NMR (151 MHz, CDCl<sub>3</sub>) δ 173.91, 141.15, 140.21, 133.43, 132.46, 131.59, 128.42, 128.32, 127.68, 127.65, 126.20, 125.63, 125.23, 125.18, 120.55, 60.78, 50.24, 43.73, 41.65, 29.56, 14.30. HRMS (ESI) Calcd for [C<sub>23</sub>H<sub>21</sub>BrO<sub>2</sub> + Na]<sup>+</sup>: 431.0617, found: 431.0623.



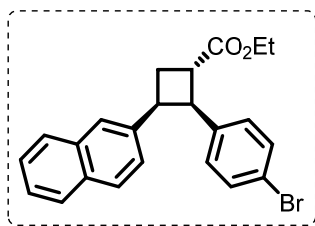

Diastereomer (minor product):  $^1\text{H}$  NMR (400 MHz,  $\text{CDCl}_3$ )  $\delta$  7.72 (t,  $J = 7.0$  Hz, 2H), 7.55 (m, 2H), 7.47 – 7.35 (m, 2H), 7.14 (d,  $J = 8.4$  Hz, 2H), 6.94 (dd,  $J = 8.4, 1.9$  Hz, 1H), 6.79 (d,  $J = 8.5$  Hz, 2H), 4.29 (t,  $J = 9.3$  Hz, 1H), 4.24 – 4.16 (m, 2H), 4.16 – 4.08 (m, 1H), 3.69 (q,  $J = 9.3$  Hz, 1H), 2.87 (dt,  $J = 12.1, 8.8$  Hz, 1H), 2.75 – 2.65 (m, 1H), 1.28 (t,  $J = 7.1$  Hz, 3H).  $^{13}\text{C}$  NMR (151 MHz,  $\text{CDCl}_3$ )  $\delta$  174.44, 138.36, 137.74, 133.23, 132.01, 130.93, 129.34, 127.67, 127.59, 127.55, 127.02, 125.93, 125.89, 125.45, 120.05, 60.81, 46.92, 42.23, 41.31, 27.14, 14.29. HRMS (ESI) Calcd for  $[\text{C}_{23}\text{H}_{21}\text{BrO}_2 + \text{Na}]^+$ : 431.0617, found: 431.0618.

#### Ethyl-2-(4-fluorophenyl)-3-(naphthalen-2-yl)cyclobutane-1-carboxylate (**7f**)

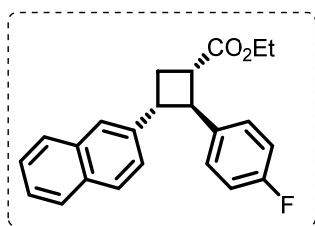

Synthesized from 2-vinylnaphthalene and ethyl (*E*)-3-(4-fluorophenyl)acrylate. Reaction time: 3 h, d.r. 1.8:1, conversion: 99%, yield: 84%.

Diastereomer (major product):  $^1\text{H}$  NMR (600 MHz,  $\text{CDCl}_3$ )  $\delta$  7.80 (m, 3H), 7.68 (s, 1H), 7.45 (m, 2H), 7.40 (d,  $J = 8.3$  Hz, 1H), 7.24 (dd,  $J = 8.3, 5.6$  Hz, 2H), 6.98 (t,  $J = 8.6$  Hz, 2H), 4.20 (q,  $J = 7.1$  Hz, 2H), 3.91 (t,  $J = 9.8$  Hz, 1H), 3.63 (q,  $J = 9.9$  Hz, 1H), 3.19 (q,  $J = 9.4$  Hz, 1H), 2.69 (dt,  $J = 10.9, 8.2$  Hz, 1H), 2.50 (q,  $J = 10.4$  Hz, 1H), 1.29 (t,  $J = 7.1$  Hz, 3H).  $^{13}\text{C}$  NMR (151 MHz,  $\text{CDCl}_3$ )  $\delta$  174.02, 161.72 (d,  $J = 244.8$  Hz), 140.36, 137.92 (d,  $J = 3.4$  Hz), 133.45, 132.45, 128.28, 128.16, 128.10, 127.66 (d,  $J = 3.9$  Hz), 126.17, 125.59, 125.29, 125.18, 115.30 (d,  $J = 21.3$  Hz), 60.73, 50.10, 43.92, 41.96, 29.57, 14.31. HRMS (ESI) Calcd for  $[\text{C}_{23}\text{H}_{21}\text{FO}_2 + \text{Na}]^+$ : 371.1418, found: 371.1419.

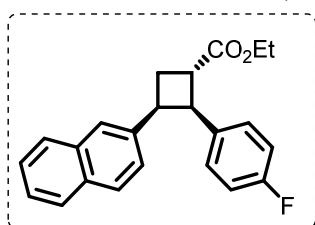

Diastereomer (minor product):  $^1\text{H}$  NMR (600 MHz,  $\text{CDCl}_3$ )  $\delta$  7.71 (dd,  $J = 12.3, 8.0$  Hz, 2H), 7.55 (s, 1H), 7.53 (d,  $J = 8.6$  Hz, 1H), 7.45 – 7.36 (m, 2H), 6.93 (d,  $J = 8.4$  Hz, 1H), 6.87 (dd,  $J = 8.4, 5.4$  Hz, 2H), 6.70 (t,  $J = 8.6$  Hz, 2H), 4.31 (t,  $J = 9.3$  Hz, 1H), 4.24 – 4.16 (m, 1H), 4.20 (t,  $J = 6.7$  Hz, 1H), 4.12 (td,  $J = 9.2, 3.9$  Hz, 1H), 3.68 (q,  $J = 9.0$  Hz, 1H), 2.86 (dt,  $J = 12.3, 8.8$  Hz, 1H), 2.71 (m, 1H), 1.28 (t,  $J = 7.1$  Hz, 3H).  $^{13}\text{C}$  NMR (151 MHz,  $\text{CDCl}_3$ )  $\delta$  174.55, 161.27 (d,  $J = 244.2$  Hz), 137.85, 134.99 (d,  $J = 3.2$  Hz), 133.23, 131.97, 129.06 (d,  $J = 7.8$  Hz), 127.57, 127.52, 127.11, 125.87, 125.39, 114.66 (d,  $J = 21.2$  Hz), 60.77, 46.82, 42.34, 41.48, 26.97, 14.29. HRMS (ESI) Calcd for  $[\text{C}_{23}\text{H}_{21}\text{FO}_2 + \text{Na}]^+$ : 371.1418, found: 371.1420.

#### Methyl 3-(naphthalen-2-yl)-2-phenylcyclobutane-1-carboxylate (**7g**)

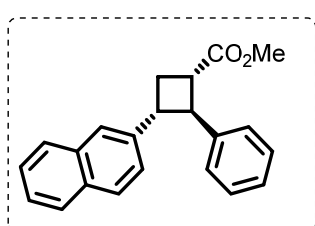

Synthesized from 2-vinylnaphthalene and methyl cinnamate. Reaction time: 3 h, d.r. 1.7 :1, conversion: 99%, yield: 73%. Diastereomer (major product):  $^1\text{H}$  NMR (600 MHz,  $\text{CDCl}_3$ )  $\delta$  7.79 (m, 3H), 7.70 (s, 1H), 7.47 – 7.39 (m, 3H), 7.33 – 7.25 (m, 4H), 7.22 (t,  $J = 7.0$  Hz, 1H), 3.97 (t,  $J = 9.7$  Hz, 1H), 3.74 (s, 3H), 3.68 (q,  $J = 9.6$  Hz, 1H), 3.27 (q,  $J = 9.3$  Hz, 1H), 2.70 (dt,  $J = 10.4, 8.3$  Hz, 1H), 2.52 (q,  $J = 10.4$  Hz, 1H).  $^{13}\text{C}$  NMR (151 MHz,  $\text{CDCl}_3$ )  $\delta$  174.63, 142.11, 140.58, 133.46, 132.43, 128.53, 128.22, 127.70, 127.64,

126.76, 126.62, 126.12, 125.53, 125.40, 125.22, 51.90, 50.79, 43.88, 41.45, 29.66.  
HRMS (ESI) Calcd for [C<sub>22</sub>H<sub>20</sub>O<sub>2</sub> + Na]<sup>+</sup>: 339.1356, found: 339.1360.

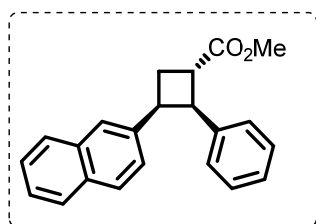

Diastereomer (minor product): <sup>1</sup>H NMR (600 MHz, CDCl<sub>3</sub>) δ 7.69 (dd, *J* = 18.2, 8.0 Hz, 2H), 7.55 (s, 1H), 7.51 (d, *J* = 8.5 Hz, 1H), 7.38 (dt, *J* = 22.5, 7.1 Hz, 2H), 7.02 (m, 2H), 6.99 – 6.96 (m, 1H), 6.95 – 6.90 (m, 3H), 4.36 (t, *J* = 9.3 Hz, 1H), 4.15 (td, *J* = 9.3, 4.1 Hz, 1H), 3.77 (q, *J* = 9.0 Hz, 1H), 3.74 (s, 3H), 2.89 (dt, *J* = 12.1, 8.8 Hz, 1H), 2.75 – 2.68 (m, 1H). <sup>13</sup>C NMR (151 MHz, CDCl<sub>3</sub>) δ 175.19, 139.11, 138.08, 133.22, 131.94, 127.86, 127.60, 127.59, 127.48, 127.36, 127.15, 126.14, 125.89, 125.75, 125.26, 51.95, 47.59, 42.41, 40.86, 27.16. HRMS (ESI) Calcd for [C<sub>22</sub>H<sub>20</sub>O<sub>2</sub> + Na]<sup>+</sup>: 339.1356, found: 339.1359.

#### Ethyl-2-(4-methoxyphenyl)-3-(naphthalen-2-yl)cyclobutane-1-carboxylate (**7h**)

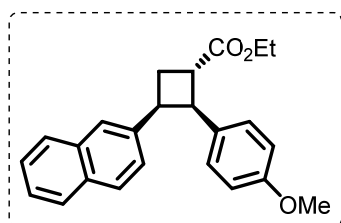

Synthesized from 2-vinylnaphthalene and ethyl (*E*)-3-(4-methoxyphenyl)acrylate. Reaction time: 3 h, d.r. 5:1, conversion: 99%, yield: 70%. <sup>1</sup>H NMR (400 MHz, CDCl<sub>3</sub>) δ 7.72 (dd, *J* = 11.8, 7.8 Hz, 2H), 7.57 (s, 1H), 7.53 (d, *J* = 8.5 Hz, 1H), 7.47 – 7.34 (m, 2H), 6.95 (dd, *J* = 8.5, 1.8 Hz, 1H), 6.87 – 6.80 (m, 2H), 6.59 – 6.53 (m, 2H), 4.29 (t, *J* = 9.2 Hz, 1H), 4.19 (qt, *J* = 7.1, 3.7 Hz, 2H), 4.11 (td, *J* = 9.1, 4.1 Hz, 1H), 3.68 (q, *J* = 9.2 Hz, 1H), 3.64 (s, 3H), 2.84 (dt, *J* = 12.0, 8.7 Hz, 1H), 2.76 – 2.66 (m, 1H), 1.28 (t, *J* = 7.1 Hz, 3H). <sup>13</sup>C NMR (151 MHz, CDCl<sub>3</sub>) δ 174.71, 157.76, 138.19, 133.17, 131.86, 131.37, 128.61, 127.53, 127.42, 127.29, 127.26, 125.70, 125.64, 125.13, 113.18, 60.57, 54.97, 46.90, 42.33, 41.56, 26.90, 14.21. HRMS (ESI) Calcd for [C<sub>24</sub>H<sub>24</sub>O<sub>3</sub> + Na]<sup>+</sup>: 383.1618, found: 383.1620.

#### Ethyl-3-(naphthalen-2-yl)-2-(4-nitrophenyl)cyclobutane-1-carboxylate (**7i**)

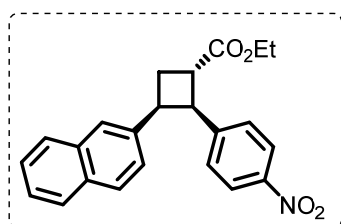

Synthesized from 2-vinylnaphthalene and ethyl (*E*)-3-(4-nitrophenyl)acrylate. Reaction time: 3 h, d.r. 2.3:1, conversion: 99%, yield: 71%. <sup>1</sup>H NMR (400 MHz, CDCl<sub>3</sub>) δ 7.94 – 7.88 (m, 2H), 7.77 – 7.69 (m, 2H), 7.60 (s, 1H), 7.56 (d, *J* = 8.5 Hz, 1H), 7.49 – 7.39 (m, 2H), 7.14 – 7.08 (m, 2H), 6.97 (dd, *J* = 8.5, 1.8 Hz, 1H), 4.47 (t, *J* = 9.4 Hz, 1H), 4.25 (dd, *J* = 7.1, 2.8 Hz, 2H), 4.29 – 4.17 (m, 1H), 3.83 (q, *J* = 9.1 Hz, 1H), 2.96 (dt, *J* = 12.2, 8.9 Hz, 1H), 2.82 – 2.69 (m, 1H), 1.32 (t, *J* = 7.1 Hz, 3H). <sup>13</sup>C NMR (151 MHz, CDCl<sub>3</sub>) δ 174.02, 147.16, 146.27, 137.14, 133.19, 132.07, 128.32, 127.96, 127.59, 127.53, 126.54, 126.19, 126.02, 125.72, 123.12, 61.02, 47.08, 42.51, 41.06, 27.29, 14.28. HRMS (ESI) Calcd for [C<sub>23</sub>H<sub>21</sub>NO<sub>4</sub> + Na]<sup>+</sup>: 398.1363, found: 398.1369.

### 2-(Naphthalen-2-yl)cyclobutyl)benzotrile (**7j**)

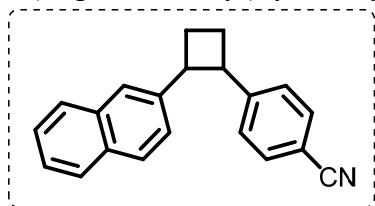

Synthesized from 2-vinylnaphthalene and 4-vinylbenzotrile. Reaction time: 3 h, d.r. > 20:1, conversion: 99%, yield: 44%. <sup>1</sup>H NMR (500 MHz, Chloroform-*d*) δ 7.80 (q, *J* = 6.9, 6.4 Hz, 3H), 7.64 (d, *J* = 1.6 Hz, 1H), 7.57 (d, *J* = 8.2 Hz, 2H), 7.51 – 7.41 (m, 2H), 7.35 (dd, *J* = 8.5, 1.8 Hz, 1H), 7.31 (d, *J* = 8.2 Hz, 2H), 3.79 – 3.65 (m, 2H), 2.47 – 2.38 (m, 2H), 2.35 – 2.25 (m, 1H), 2.25 – 2.14 (m, 1H). <sup>13</sup>C NMR (126 MHz, Chloroform-*d*) δ 149.95, 140.99, 133.46, 132.35, 132.25, 128.26, 127.67, 127.63, 127.37, 126.20, 125.55, 125.19, 124.84, 119.15, 109.89, 48.31, 47.72, 26.11, 25.43. HRMS (ESI) Calcd for [C<sub>21</sub>H<sub>17</sub>N + H]<sup>+</sup>: 284.1434, found: 284.1427.

### 2-(2-(4-Fluorophenyl)cyclobutyl)naphthalene (**7k**)

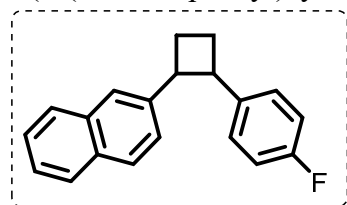

Synthesized from 2-vinylnaphthalene and 4-vinylbenzotrile. Reaction time: 3 h, d.r. > 20:1, conversion: 99%, yield: 17%. <sup>1</sup>H NMR (500 MHz, Chloroform-*d*) δ 7.86 – 7.79 (m, 3H), 7.67 (d, *J* = 1.7 Hz, 1H), 7.53 – 7.41 (m, 2H), 7.39 (dd, *J* = 8.5, 1.8 Hz, 1H), 7.23 (dd, *J* = 8.5, 5.5 Hz, 2H), 7.05 – 6.95 (m, 2H), 3.77 – 3.61 (m, 2H), 2.48 – 2.36 (m, 2H), 2.31 – 2.23 (m, 1H), 2.23 – 2.15 (m, 1H). <sup>13</sup>C NMR (126 MHz, Chloroform-*d*) δ 161.39 (d, *J* = 243.8 Hz), 141.70, 140.20 (d, *J* = 3.2 Hz), 133.48, 132.24, 128.04, 128.00 (d, *J* = 4.7 Hz), 127.63, 126.02, 125.41, 125.33, 124.70, 115.07 (d, *J* = 21.2 Hz), 48.58, 47.27, 26.03, 25.87. HRMS (ESI) Calcd for [C<sub>20</sub>H<sub>17</sub>F + H]<sup>+</sup>: 277.1387, found: 277.1448.

### 2-(2-(4-(Tert-butyl)phenyl)cyclobutyl)naphthalene (**7l**)

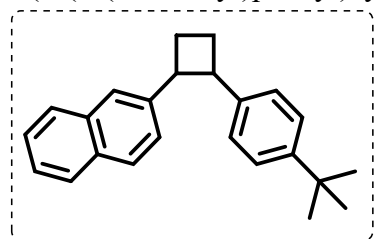

Synthesized from 2-vinylnaphthalene and 4-vinylbenzotrile. Reaction time: 3 h, d.r. 6:1, conversion: 90%, yield: 10%. <sup>1</sup>H NMR (500 MHz, Chloroform-*d*) δ 7.82 – 7.74 (m, 3H), 7.71 – 7.63 (m, 0.45H), 7.46 – 7.35 (m, 3H), 7.32 (d, *J* = 8.3 Hz, 2H), 7.20 (d, *J* = 8.0 Hz, 2H), 7.05 (d, *J* = 8.4 Hz, 0.3H), 6.99 – 6.92 (m, 0.3H), 6.89 (d, *J* = 8.3 Hz, 0.3H), 4.19 – 4.01 (m, 0.3H), 3.79 – 3.60 (m, 2H), 2.45 – 2.30 (m, 2H), 2.27 – 2.08 (m, 2H), 2.01 (q, *J* = 6.5 Hz, 0.3H), 1.31 (s, 9H), 1.16 (s, 1.35H). <sup>13</sup>C NMR (126 MHz, Chloroform-*d*) δ 148.90, 142.21, 141.58, 133.49, 132.18, 127.88, 127.63, 127.60, 126.29, 125.91, 125.58, 125.22, 125.19, 124.69, 48.11, 47.27, 34.41, 31.41, 26.13, 25.99. HRMS (ESI) Calcd for [C<sub>24</sub>H<sub>26</sub> + H]<sup>+</sup>: 315.2107, found: 315.2101.

Diethyl-3,4-diphenylcyclobutane-1,2-dicarboxylate (**7a**)<sup>12</sup>



Synthesized from ethyl cinnamate. Reaction time: 3 h, d.r. > 20:1, yield: 8%. <sup>1</sup>H NMR (400 MHz, CDCl<sub>3</sub>) δ 7.39 – 7.19 (m, 10H), 4.20 (q, *J* = 7.1 Hz, 4H), 3.79 – 3.72 (m, 2H), 3.48 – 3.42 (m, 2H), 1.26 (t, *J* = 7.1 Hz, 6H). <sup>13</sup>C NMR (101 MHz, CDCl<sub>3</sub>) δ 172.60, 141.20, 128.62, 127.08, 126.86, 61.03, 47.00, 44.86, 14.26.

Diethyl-3,4-bis(4-bromophenyl)cyclobutane-1,2-dicarboxylate (**7m**)<sup>12</sup>

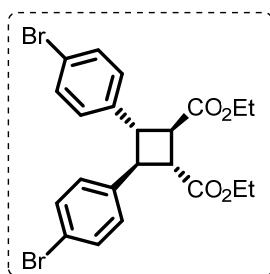

Synthesized from ethyl (*E*)-3-(4-bromophenyl)acrylate. Reaction time: 3 h, d.r. > 20:1, yield: 5%. <sup>1</sup>H NMR (600 MHz, Chloroform-*d*) δ 7.45 (d, *J* = 8.2 Hz, 4H), 7.14 (d, *J* = 8.1 Hz, 4H), 4.20 (qd, *J* = 7.1, 1.6 Hz, 4H), 3.64 – 3.58 (m, 2H), 3.41 – 3.35 (m, 2H), 1.26 (t, *J* = 7.1 Hz, 7H). <sup>13</sup>C NMR (151 MHz, Chloroform-*d*) δ 172.17, 139.71, 131.81, 128.52, 121.17, 61.21, 46.59, 44.62, 14.22.

Diethyl-3,4-bis(4-fluorophenyl)cyclobutane-1,2-dicarboxylate (**7n**)<sup>12</sup>

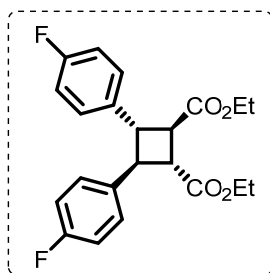

Synthesized from ethyl (*E*)-3-(4-fluorophenyl)acrylate. Reaction time: 3 h, d.r. > 20:1, yield: 17%. <sup>1</sup>H NMR (600 MHz, Chloroform-*d*) δ 7.27 – 7.21 (m, 4H), 7.01 (t, *J* = 8.6 Hz, 4H), 4.20 (qd, *J* = 7.1, 1.6 Hz, 4H), 3.68 – 3.62 (m, 2H), 3.42 – 3.35 (m, 2H), 1.27 (t, *J* = 7.1 Hz, 7H). <sup>13</sup>C NMR (151 MHz, Chloroform-*d*) δ 172.34, 161.98 (d, *J* = 245.6 Hz), 136.63 (d, *J* = 3.3 Hz), 128.34 (d, *J* = 8.1 Hz), 115.52 (d, *J* = 21.3 Hz), 61.13,

46.65, 44.94, 14.23.

Dimethyl-3,4-diphenylcyclobutane-1,2-dicarboxylate (**7o**)<sup>12</sup>

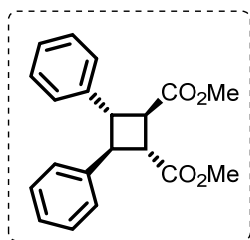

Synthesized from methyl cinnamate. Reaction time: 3 h, d.r. > 20:1, yield: 9%. <sup>1</sup>H NMR (500 MHz, Chloroform-*d*) δ 7.37 – 7.22 (m, 11H), 3.77 – 3.71 (m, 9H), 3.52 – 3.47 (m, 2H). <sup>13</sup>C NMR (126 MHz, Chloroform-*d*) δ 173.01, 140.96, 128.66, 127.17, 126.84, 52.24, 47.35, 44.43.

Diethyl-3,4-bis(4-methoxyphenyl)cyclobutane-1,2-dicarboxylate (**7p**)<sup>12</sup>

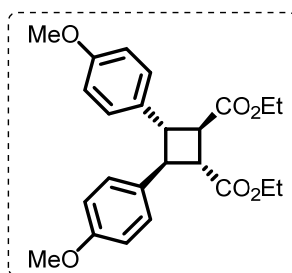

Synthesized from ethyl (*E*)-3-(4-methoxyphenyl)acrylate. Reaction time: 3 h, d.r. > 20:1, yield: 18%. <sup>1</sup>H NMR (600 MHz, Chloroform-*d*) δ 7.24 (d, *J* = 8.2 Hz, 4H), 6.88 (d, *J* = 8.2 Hz, 4H), 4.22 (q, *J* = 7.1 Hz, 4H), 3.82 (s, 6H), 3.68 – 3.62 (m, 2H), 3.42 – 3.37 (m, 2H), 1.29 (t, *J* = 7.1 Hz, 6H). <sup>13</sup>C NMR (151 MHz, Chloroform-*d*) δ 172.60, 158.57, 133.28, 127.85, 113.89, 60.84, 55.20, 46.85, 44.93, 14.18.

Diethyl -3,4-bis(4-nitrophenyl)cyclobutane-1,2-dicarboxylate (**7q**)<sup>12</sup>

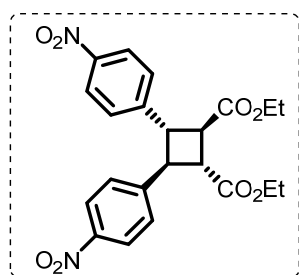

Synthesized from ethyl (*E*)-3-(4-nitrophenyl)acrylate..  
Reaction time: 3 h, d.r. > 20:1, yield: 12%.

<sup>1</sup>H NMR (400 MHz, Chloroform-*d*) δ 8.25 – 8.19 (m, 4H), 7.49 – 7.43 (m, 4H), 4.24 (qd, *J* = 7.1, 1.5 Hz, 4H), 3.88 – 3.83 (m, 2H), 3.54 – 3.47 (m, 2H), 1.29 (t, *J* = 7.1 Hz, 6H).

4,4'-(Cyclobutane-1,2-diyl)dibenzonitrile (**7r**)<sup>16</sup>

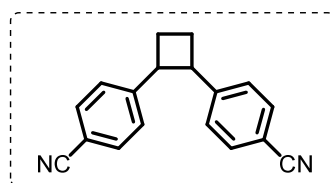

Synthesized from 4-vinylbenzonitrile. Reaction time: 3 h, d.r. 3:1, yield: 38%.

Diastereomer (major product): <sup>1</sup>H NMR (500 MHz, Chloroform-*d*) δ 7.60 (d, *J* = 8.2 Hz, 4H), 7.29 (d, *J* = 8.1 Hz, 4H), 3.61 (td, *J* = 10.5, 9.5, 5.3 Hz, 2H), 2.47 – 2.35

(m, 2H), 2.27 – 2.14 (m, 2H). <sup>13</sup>C NMR (126 MHz, Chloroform-*d*) δ 148.91, 132.41, 127.32, 118.90, 110.36, 47.70, 25.64. Diastereomer (minor product): <sup>1</sup>H NMR (500 MHz, Chloroform-*d*) δ 7.40 (d, *J* = 8.1 Hz, 4H), 7.01 (d, *J* = 8.1 Hz, 4H), 4.18 – 4.07 (m, 2H), 2.64 – 2.53 (m, 2H), 2.51 – 2.40 (m, 2H). <sup>13</sup>C NMR (126 MHz, Chloroform-*d*) δ 146.38, 131.82, 128.40, 118.82, 109.89, 45.21, 23.78.

**Table S6.** Intermolecular [2π+2σ]-photocycloaddition.

| Entry                                                                                                                                                                                                                                                                                                                                                               | PC                                                        | 7s yield (%) |
|---------------------------------------------------------------------------------------------------------------------------------------------------------------------------------------------------------------------------------------------------------------------------------------------------------------------------------------------------------------------|-----------------------------------------------------------|--------------|
| 1                                                                                                                                                                                                                                                                                                                                                                   | UiO-68[Au1] <sub>4.5%</sub>                               | 6%           |
| 2                                                                                                                                                                                                                                                                                                                                                                   | [Au(C <sup>^</sup> N <sup>^</sup> C)(NHC)]PF <sub>6</sub> | 21%          |
| Reaction conditions: 0.5 mmol 2 <i>H</i> -chromen-2-one, 0.1 mmol <i>N</i> -methoxy- <i>N</i> -methylbicyclo[1.1.0]butane-1-carboxamide (prepared according to the literature <sup>11</sup> ), 2 mol% photocatalyst, 2 mL MeCN, 25 °C, 20 h; Yield was determined by <sup>1</sup> H NMR spectroscopy using CH <sub>2</sub> Br <sub>2</sub> as an internal standard. |                                                           |              |

## 9 General procedure H for visible-light-driven oxidative organic transformations

### 9.1 Oxidation of sulfides (8a)<sup>17</sup>

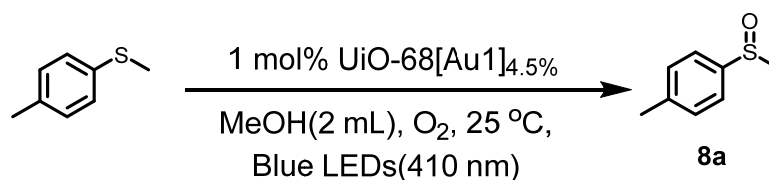

Methyl(*p*-tolyl)sulfane (0.1 mmol) and **UiO-68[Au1]<sub>4.5%</sub>** (1 mol%) were weighed and added to a 10 mL reaction tube equipped with a stir bar. 2 mL of methanol was added to the tube. The reaction mixture was degassed by bubbling O<sub>2</sub> and then stirred at room temperature under irradiation from a 410 nm LED with cooling by running water. After 30 min, the tube was opened and chlorodiphenylmethane (0.1 mmol) was added as an internal standard. Conversion and yields were determined using <sup>1</sup>H NMR spectroscopy. The crude product was purified by column chromatography on silica gel (eluent: EA/PE) to afford the pure product. <sup>1</sup>H NMR (400 MHz, CDCl<sub>3</sub>) δ 7.55 (d, *J* = 8.2 Hz, 2H), 7.34 (d, *J* = 8.2 Hz, 2H), 2.71 (s, 3H), 2.43 (s, 3H).

### 9.2 Oxidation of dibenzylamine (8b)<sup>18</sup>

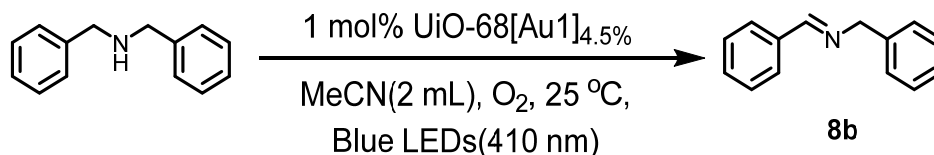

Dibenzylamine (0.1 mmol) and **UiO-68[Au1]<sub>4.5%</sub>** (1 mol%) were weighed and added to a 10 mL reaction tube equipped with a stir bar. 2 mL of MeCN was added to the tube. The reaction mixture was degassed by bubbling O<sub>2</sub> and then stirred at room temperature under irradiation from a 410 nm LED with cooling by running water. After 2 h, the tube was opened and chlorodiphenylmethane (0.1 mmol) was added as an internal standard. Conversion and yields were determined using <sup>1</sup>H NMR spectroscopy. The crude product was purified by column chromatography on silica gel (eluent: EA/PE) to afford the pure product. <sup>1</sup>H NMR (600 MHz, CDCl<sub>3</sub>) δ 8.43 (s, 1H), 7.84 – 7.78 (m, 2H), 7.47 – 7.42 (m, 3H), 7.39 – 7.34 (m, 4H), 7.32 – 7.29 (m, 1H), 4.86 (s, 2H).

### 9.3 Visible-light-driven cross-dehydrogenative coupling reactions.

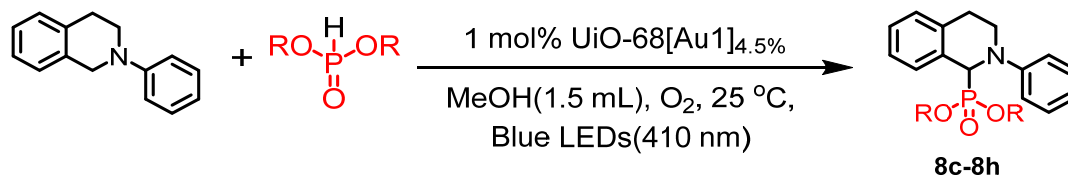

2-Phenyl-1,2,3,4-tetrahydroisoquinoline (0.1 mmol), phosphite (0.3 mmol) and **UiO-68[Au1]<sub>4.5%</sub>** (1 mol%) were weighed and added to a 10 mL reaction tube equipped with a stir bar. 1.5 mL of MeOH was added to the reaction tube. The reaction mixture was degassed by bubbling O<sub>2</sub> and then stirred at room temperature under irradiation from a 410 nm LED with cooling by running water. After the indicated reaction time, the tube was opened and chlorodiphenylmethane (0.1 mmol) was added as an internal standard. Conversion and yields were determined using <sup>1</sup>H NMR spectroscopy. The crude product was purified by column chromatography on silica gel (eluent: EA/PE) to afford the pure product **8c-8h**. (The catalyst **UiO-68[Au1]<sub>4.5%</sub>** was recovered by washing with MeOH several times. The recovered MOF catalyst was then used in subsequent reactions for cycle tests, with fresh substrates added.)

#### Dimethyl (2-phenyl-1,2,3,4-tetrahydroisoquinolin-1-yl)phosphonate (**8c**)<sup>19</sup>

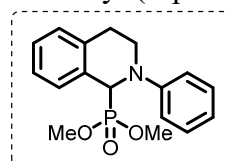

Synthesized from 2-phenyl-1,2,3,4-tetrahydroisoquinoline and dimethyl phosphonate, yield: 97%. <sup>1</sup>H NMR (400 MHz, CDCl<sub>3</sub>) δ 7.39 – 7.34 (m, 1H), 7.30 – 7.15 (m, 5H), 6.98 (d, *J* = 8.2 Hz, 2H), 6.82 (t, *J* = 7.3 Hz, 1H), 5.21 (d, *J* = 20.0 Hz, 1H), 4.07 – 3.98 (m, 1H), 3.71 – 3.62 (m, 7H), 3.15 – 2.95 (m, 2H). <sup>13</sup>C NMR (101 MHz, CDCl<sub>3</sub>) δ 149.25 (d, *J* = 6.1 Hz), 136.43 (d, *J* = 5.6 Hz), 130.39, 129.28, 128.87 (d, *J* = 2.6 Hz), 127.96 (d, *J* = 4.6 Hz), 127.58 (d, *J* = 3.6 Hz), 126.09 (d, *J* = 2.9 Hz), 118.70, 114.78, 58.76 (d, *J* = 159.7 Hz), 53.99 (d, *J* = 7.1 Hz), 52.98 (d, *J* = 7.7 Hz), 43.58, 26.69.

#### Diisobutyl (2-phenyl-1,2,3,4-tetrahydroisoquinolin-1-yl)phosphonate (**8d**)<sup>19</sup>

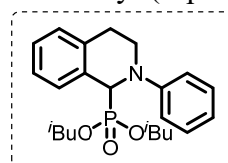

Synthesized from 2-phenyl-1,2,3,4-tetrahydroisoquinoline and diisobutyl phosphonate, yield: 89%. <sup>1</sup>H NMR (400 MHz, CDCl<sub>3</sub>) δ 7.40 – 7.36 (m, 1H), 7.28 – 7.13 (m, 5H), 6.98 (d, *J* = 8.2 Hz, 2H), 6.79 (t, *J* = 7.3 Hz, 1H), 5.22 (d, *J* = 19.8 Hz, 1H), 4.07 – 3.97 (m, 1H), 3.85 – 3.71 (m, 2H), 3.70 – 3.59 (m, 2H), 3.53 (dt, *J* = 9.7, 6.2 Hz, 1H), 3.13 – 2.95 (m, 2H), 1.92 – 1.68 (m, 2H), 0.88 (dd, *J* = 6.7, 3.8 Hz, 6H), 0.80 (dd, *J* = 6.7, 4.6 Hz, 6H). <sup>13</sup>C NMR (126 MHz, CDCl<sub>3</sub>) δ 149.30 (d, *J* = 5.4 Hz), 136.41 (d, *J* = 5.4 Hz), 130.80, 129.14, 128.74 (d, *J* = 2.7 Hz), 128.14 (d, *J* = 4.7 Hz), 127.43 (d, *J* = 3.4 Hz), 125.87 (d, *J* = 2.9 Hz), 118.38, 114.73, 72.99 (d, *J* = 7.8 Hz), 72.08 (d, *J* = 8.2 Hz), 58.73 (d, *J* = 159.0 Hz), 43.46, 29.24 (d, *J* = 5.9 Hz), 26.83, 18.73 (d, *J* = 5.8 Hz), 18.63 (d, *J* = 4.3 Hz).

Diethyl (2-phenyl-1,2,3,4-tetrahydroisoquinolin-1-yl)phosphonate (**8e**)<sup>20</sup>

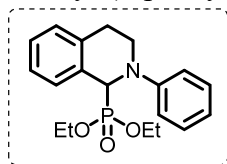

Synthesized from 2-phenyl-1,2,3,4-tetrahydroisoquinoline and diethyl phosphonate, yield: 85%. <sup>1</sup>H NMR (400 MHz, CDCl<sub>3</sub>) δ 7.40 – 7.36 (m, 1H), 7.30 – 7.12 (m, 5H), 6.98 (d, *J* = 7.9 Hz, 2H), 6.80 (t, *J* = 7.3 Hz, 1H), 5.19 (d, *J* = 20.0 Hz, 1H), 4.17 – 3.83 (m, 5H), 3.69 – 3.58 (m, 1H), 3.15 – 2.94 (m, 2H), 1.25 (t, *J* = 7.1 Hz, 3H), 1.15 (t, *J* = 7.1 Hz, 3H). <sup>13</sup>C NMR (126 MHz, CDCl<sub>3</sub>) δ 149.40 (d, *J* = 5.8 Hz), 136.46 (d, *J* = 5.5 Hz), 130.65, 129.15, 128.76 (d, *J* = 2.8 Hz), 128.13 (d, *J* = 4.6 Hz), 127.44 (d, *J* = 3.5 Hz), 125.88 (d, *J* = 2.8 Hz), 118.46, 114.78, 63.35 (d, *J* = 7.3 Hz), 62.35 (d, *J* = 7.7 Hz), 58.82 (d, *J* = 159.4 Hz), 43.49, 26.76, 16.48 (d, *J* = 5.4 Hz), 16.39 (d, *J* = 5.9 Hz).

Diisopropyl (2-phenyl-1,2,3,4-tetrahydroisoquinolin-1-yl)phosphonate (**8f**)<sup>20</sup>

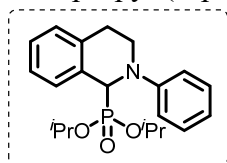

Synthesized from 2-phenyl-1,2,3,4-tetrahydroisoquinoline and diisopropyl phosphonate, yield: 92%. <sup>1</sup>H NMR (400 MHz, CDCl<sub>3</sub>) δ 7.43 – 7.37 (m, 1H), 7.26 – 7.09 (m, 5H), 6.96 (d, *J* = 8.2 Hz, 2H), 6.77 (t, *J* = 7.3 Hz, 1H), 5.14 (d, *J* = 21.2 Hz, 1H), 4.71 – 4.55 (m, 2H), 4.12 – 4.00 (m, 1H), 3.70 – 3.61 (m, 1H), 3.10 – 2.92 (m, 2H), 1.30 (dd, *J* = 7.4, 6.2 Hz, 6H), 1.17 (d, *J* = 6.2 Hz, 3H), 0.95 (d, *J* = 6.2 Hz, 3H). <sup>13</sup>C NMR (126 MHz, CDCl<sub>3</sub>) δ 149.56 (d, *J* = 6.5 Hz), 136.44 (d, *J* = 5.6 Hz), 130.90 (d, *J* = 1.3 Hz), 129.01, 128.73 (d, *J* = 2.6 Hz), 128.44 (d, *J* = 4.5 Hz), 127.29 (d, *J* = 3.5 Hz), 125.64 (d, *J* = 2.9 Hz), 118.28, 115.05, 72.28 (d, *J* = 7.7 Hz), 70.88 (d, *J* = 8.3 Hz), 58.77 (d, *J* = 161.2 Hz), 43.49, 26.57, 24.62 (d, *J* = 2.8 Hz), 24.16 (d, *J* = 3.2 Hz), 23.76 (d, *J* = 5.7 Hz), 23.33 (d, *J* = 5.5 Hz).

Dibutyl (2-phenyl-1,2,3,4-tetrahydroisoquinolin-1-yl)phosphonate (**8g**)<sup>20</sup>

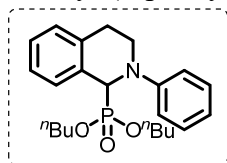

Synthesized from 2-phenyl-1,2,3,4-tetrahydroisoquinoline and dibutyl phosphonate, yield: 76%. <sup>1</sup>H NMR (400 MHz, CDCl<sub>3</sub>) δ 7.40 – 7.35 (m, 1H), 7.27 – 7.12 (m, 5H), 6.97 (d, *J* = 8.2 Hz, 2H), 6.79 (t, *J* = 7.3 Hz, 1H), 5.20 (d, *J* = 19.9 Hz, 1H), 4.07 – 3.93 (m, 3H), 3.93 – 3.84 (m, 1H), 3.84 – 3.75 (m, 1H), 3.69 – 3.59 (m, 1H), 3.13 – 2.93 (m, 2H), 1.61 – 1.52 (m, 2H), 1.50 – 1.41 (m, 2H), 1.39 – 1.19 (m, 4H), 0.89 (t, *J* = 7.4 Hz, 3H), 0.82 (t, *J* = 7.4 Hz, 3H). <sup>13</sup>C NMR (126 MHz, CDCl<sub>3</sub>) δ 149.34 (d, *J* = 5.6 Hz), 136.42 (d, *J* = 5.4 Hz), 130.75, 129.12, 128.74 (d, *J* = 2.7 Hz), 128.11 (d, *J* = 4.6 Hz), 127.42 (d, *J* = 3.5 Hz), 125.87 (d, *J* = 3.0 Hz), 118.40, 114.74, 66.94 (d, *J* = 7.5 Hz), 65.97 (d, *J* = 8.0 Hz), 58.74 (d, *J* = 158.9 Hz), 43.45, 32.61 (d, *J* = 5.7 Hz), 32.54 (d, *J* = 5.6 Hz), 26.82, 18.68 (d, *J* = 8.0 Hz), 13.59 (d, *J* = 5.4 Hz).

Dibenzyl (2-phenyl-1,2,3,4-tetrahydroisoquinolin-1-yl)phosphonate (**8h**)<sup>19</sup>

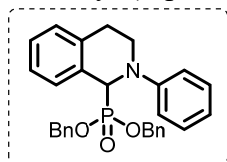

Synthesized from 2-phenyl-1,2,3,4-tetrahydroisoquinoline and dibenzyl phosphonate, yield: 81%. <sup>1</sup>H NMR (500 MHz, CDCl<sub>3</sub>) δ 7.38 – 7.09 (m, 16H), 6.99 (d, *J* = 8.3 Hz, 2H), 6.82 (t, *J* = 7.3 Hz, 1H), 5.31 (d, *J* = 19.6 Hz, 1H), 5.07 – 4.76 (m, 4H), 4.10 – 4.00 (m, 1H), 3.70 – 3.61 (m, 1H), 3.15 – 2.96 (m, 2H). <sup>13</sup>C NMR (126 MHz, CDCl<sub>3</sub>) δ 149.22 (d, *J* = 5.5 Hz), 136.53 (d, *J* = 5.5 Hz), 136.35 (d, *J* = 6.0 Hz), 136.22 (d, *J* = 6.0 Hz), 130.37, 129.22, 128.82 (d, *J* = 2.7 Hz), 128.42 (d, *J* = 10.8 Hz), 128.29, 128.21, 128.19, 128.17, 128.03 (d, *J* = 6.2 Hz), 127.58 (d, *J* = 3.5 Hz), 126.00 (d, *J* = 2.9 Hz), 118.63,



114.86, 68.66 (d,  $J = 7.3$  Hz), 67.74 (d,  $J = 7.8$  Hz), 59.02 (d,  $J = 158.2$  Hz), 43.57, 26.83.

### 9.3.1 Control experiment

**Table S7.** Control experiment for visible-light-driven cross-dehydrogenative coupling reactions.

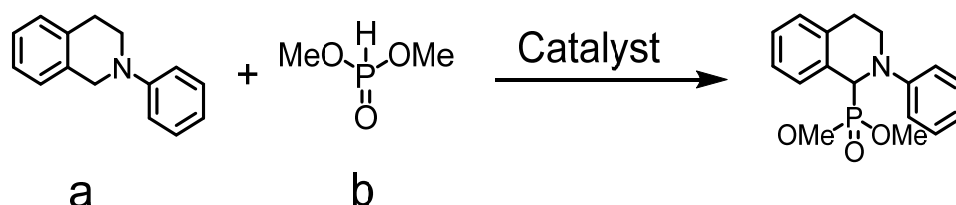

| Entry | Catalyst                                                  | Conditions                          | Yield(%)        |
|-------|-----------------------------------------------------------|-------------------------------------|-----------------|
| 1     | UiO-68[Au1] <sub>4.5%</sub>                               | O <sub>2</sub> , blue LEDs (410 nm) | 98              |
| 2     | UiO-68[Au1] <sub>4.5%</sub>                               | argon, blue LEDs (410 nm)           | 5.7             |
| 3     | UiO-68[Au1] <sub>4.5%</sub>                               | O <sub>2</sub> , lack of light      | 1.3             |
| 4     | [Au(C <sup>^</sup> N <sup>^</sup> C)(NHC)]PF <sub>6</sub> | O <sub>2</sub> , blue LEDs (410 nm) | 97              |
| 5     | UiO-68[Au1] <sub>4.5%</sub>                               | O <sub>2</sub> , blue LEDs (410 nm) | 84 <sup>a</sup> |
| 6     | No Catalyst                                               | O <sub>2</sub> , blue LEDs (410 nm) | 13 <sup>a</sup> |
| 7     | UiO-68[Au1] <sub>4.5%</sub>                               | Air, blue LEDs (410 nm)             | 93              |

Reaction conditions: 0.1 mmol **a**, 0.3 mmol **b**, 5 mg UiO-68[Au1]<sub>4.5%</sub> (or 1.5 mol% [Au(C<sup>^</sup>N<sup>^</sup>C)(NHC)]PF<sub>6</sub>), 1.5 mL MeOH, 25 °C, 30 min (or 5 min<sup>a</sup>); Yields were determined by <sup>1</sup>H NMR spectroscopy using chlorodiphenylmethane as an internal standard.

### 9.3.2 Cycle experiment

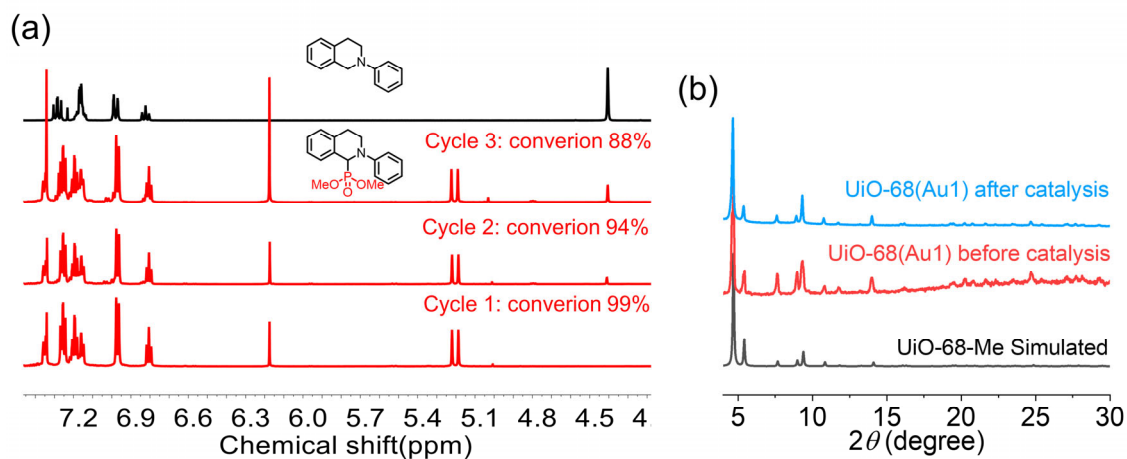

**Fig. S27.** (a)  $^1\text{H}$  NMR spectra of crude product obtained from cycle experiments. (b) PXRD patterns of  $\text{UiO-68}[\text{Au1}]_{4.5\%}$  before and after cross-dehydrogenative coupling reactions (three reaction runs).

## 10 General procedure I for visible-light-driven cyclization of alkyl halide

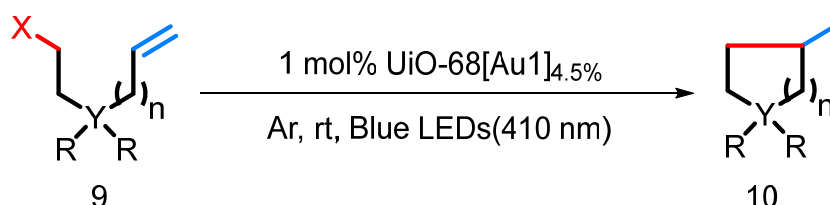

Alkyl halide (0.05 mmol, **9a–9f**), DIPEA (0.1 mmol), 1,4-CHD (0.1 mmol) and  $\text{UiO-68}[\text{Au1}]_{4.5\%}$  (1 mol%, 2.5 mg) were weighted and added to a 10 mL reaction tube equipped with a stir bar. 2 mL of solvent (MeCN/MeOH = 1:1 v/v) was added to the tube. The reaction mixture was degassed by bubbling argon and then stirred at room temperature under irradiation from a 410 nm LED with cooling by running water. After the indicated reaction time, the tube was opened and chlorodiphenylmethane (0.1 mmol) was added as an internal standard. Conversion and yields were determined using  $^1\text{H}$  NMR spectroscopy. The crude product was purified by column chromatography on silica gel (eluent: EA/PE) to afford the pure product **10a–10f**.

### Diethyl 3-methylcyclopentane-1,1-dicarboxylate (**10a**)<sup>8</sup>

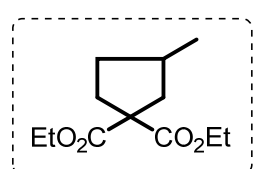

Synthesized from **9a**, yield: 97%.  $^1\text{H}$  NMR (400 MHz,  $\text{CDCl}_3$ )  $\delta$  4.17 (q,  $J = 7.1$  Hz, 4H), 2.44 (dd,  $J = 13.1, 7.1$  Hz, 1H), 2.32 (ddd,  $J = 13.7, 8.5, 3.8$  Hz, 1H), 2.14 (ddd,  $J = 13.6, 9.4, 7.5$  Hz, 1H), 2.09 – 1.99 (m, 1H), 1.90 – 1.79 (m, 1H), 1.66 (dd,  $J = 13.3, 10.1$  Hz, 1H), 1.25 (d,  $J = 7.1$  Hz, 6H), 1.22 (s, 1H), 1.01 (d,  $J = 6.6$  Hz, 2H).  $^{13}\text{C}$  NMR (126 MHz,  $\text{CDCl}_3$ )  $\delta$  172.89, 61.25, 60.34, 42.54, 34.47, 34.17, 34.04, 19.61, 14.06.

### Diethyl 3-methylcyclohexane-1,1-dicarboxylate (**10b**)<sup>8</sup>

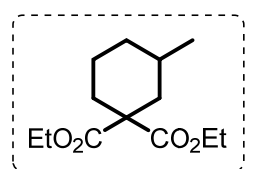

Synthesized from **9b**, yield: 85%.  $^1\text{H}$  NMR (400 MHz,  $\text{CDCl}_3$ )  $\delta$  4.20 (q,  $J = 7.1$  Hz, 2H), 4.14 (q,  $J = 7.1$  Hz, 2H), 2.37 – 2.24 (m, 2H), 1.75 – 1.66 (m, 1H), 1.65 – 1.46 (m, 3H), 1.41 (tt,  $J = 13.3, 3.4$  Hz, 1H), 1.30 – 1.23 (m, 6H), 1.21 (d,  $J = 7.1$  Hz, 2H), 0.90 (d,  $J = 6.6$  Hz, 3H), 0.88 – 0.80 (m, 1H).  $^{13}\text{C}$  NMR (101 MHz,  $\text{CDCl}_3$ )  $\delta$  172.68, 171.31, 61.23, 60.96, 55.40, 39.36, 33.97, 30.91, 28.88, 22.70, 22.56, 14.10, 14.03.

### Dimethyl 3-methylenecyclopentane-1,1-dicarboxylate (**10c**)<sup>21</sup>

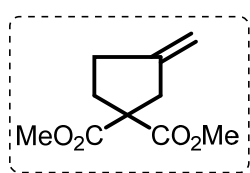

Synthesized from **9c**, yield: 96%. <sup>1</sup>H NMR (600 MHz, CDCl<sub>3</sub>) δ 4.93 – 4.87 (m, 2H), 3.73 (s, 6H), 2.92 (q, *J* = 2.0 Hz, 2H), 2.43 (td, *J* = 7.6, 2.0 Hz, 2H), 2.28 (t, *J* = 7.6 Hz, 2H). <sup>13</sup>C NMR (151 MHz, CDCl<sub>3</sub>) δ 172.16, 148.18, 107.00, 60.09, 52.74, 40.77, 33.86, 31.19.

### 3-Methyl-1-tosylpyrrolidine (**10d**)<sup>8</sup>

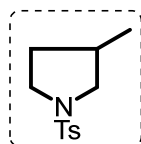

Synthesized from **9d**, yield: 97%. <sup>1</sup>H NMR (500 MHz, CDCl<sub>3</sub>) δ 7.71 (d, *J* = 8.3 Hz, 2H), 7.32 (d, *J* = 8.0 Hz, 2H), 3.42 (dd, *J* = 9.6, 7.2 Hz, 1H), 3.34 (ddd, *J* = 9.8, 8.1, 4.1 Hz, 1H), 3.26 – 3.18 (m, 1H), 2.75 (dd, *J* = 9.7, 7.8 Hz, 1H), 2.44 (s, 3H), 2.18 – 2.06 (m, 1H), 1.96 – 1.84 (m, 1H), 1.35 (dq, *J* = 12.3, 8.4 Hz, 1H), 0.92 (d, *J* = 6.7 Hz, 3H). <sup>13</sup>C NMR (126 MHz, CDCl<sub>3</sub>) δ 143.25, 133.97, 129.60, 127.51, 54.76, 47.62, 33.31, 33.25, 21.55, 17.65.

### 3-Methyl-1-tosylpiperidine (**10e**)<sup>22</sup>

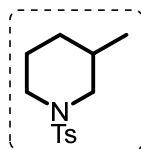

Synthesized from **9e**, yield: 90%. <sup>1</sup>H NMR (400 MHz, CDCl<sub>3</sub>) δ 7.64 (d, *J* = 8.3 Hz, 2H), 7.32 (d, *J* = 8.0 Hz, 2H), 3.71 – 3.56 (m, 2H), 2.44 (s, 3H), 2.20 (td, *J* = 11.3, 2.9 Hz, 1H), 1.87 (t, *J* = 10.7 Hz, 1H), 1.80 – 1.53 (m, 4H), 0.87 (d, *J* = 6.5 Hz, 3H), 0.85 – 0.76 (m, 1H). <sup>13</sup>C NMR (126 MHz, CDCl<sub>3</sub>) δ 143.28, 133.28, 129.56, 127.68, 53.22, 46.46, 32.09, 30.70, 24.70, 21.54, 19.02.

### 3,3-Dimethyl-1-tosylpyrrolidine (**10f**)<sup>23</sup>

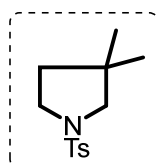

Synthesized from **9f**, yield: 95%. <sup>1</sup>H NMR (500 MHz, CDCl<sub>3</sub>) δ 7.72 (d, *J* = 8.3 Hz, 2H), 7.32 (d, *J* = 8.0 Hz, 2H), 3.33 (t, *J* = 7.1 Hz, 2H), 2.98 (s, 2H), 2.43 (s, 3H), 1.55 (t, *J* = 7.1 Hz, 2H), 0.92 (s, 6H). <sup>13</sup>C NMR (126 MHz, CDCl<sub>3</sub>) δ 143.23, 134.09, 129.57, 127.44, 60.20, 46.99, 39.13, 38.63, 26.06, 21.56.

## 10.1 Control experiments

**Table S8.** Control experiments for visible-light-driven cyclization of alkyl halide.

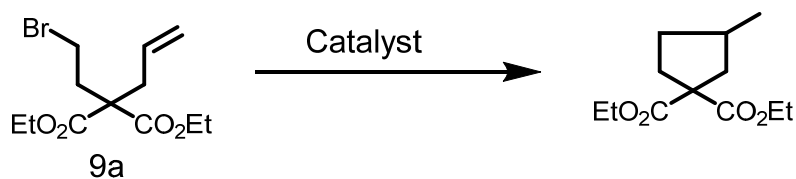

| Entry | Catalyst                                   | Conditions        | Yield(%) |
|-------|--------------------------------------------|-------------------|----------|
| 1     | UiO-68[Au1] <sub>4.5%</sub>                | Ar                | 82%      |
| 2     | UiO-68[Au1] <sub>4.5%</sub>                | Air               | trace    |
| 3     | UiO-68[Au1] <sub>4.5%</sub>                | Ar, lack of DIPEA | trace    |
| 4     | UiO-68[Au1] <sub>4.5%</sub>                | Ar, lack of light | trace    |
| 5     | [Au(C <sup>N</sup> C)(NHC)]PF <sub>6</sub> | Ar                | 84%      |
| 6     | UiO-68-Me                                  | Ar                | trace    |
| 7     | No Catalyst                                | Ar                | trace    |

Reaction conditions: 0.1 mmol **9a**, 0.2 mmol DIPEA, 5 mg UiO-68[Au1]<sub>4.5%</sub>/5 mg UiO-68-Me/1.5 mol% [Au(C<sup>N</sup>C)(NHC)]PF<sub>6</sub>, 2 mL MeCN, under argon (or air), 25 °C, 410 nm LED irradiation, 2 h; Yields were determined by <sup>1</sup>H NMR using chlorodiphenylmethane as an internal standard.

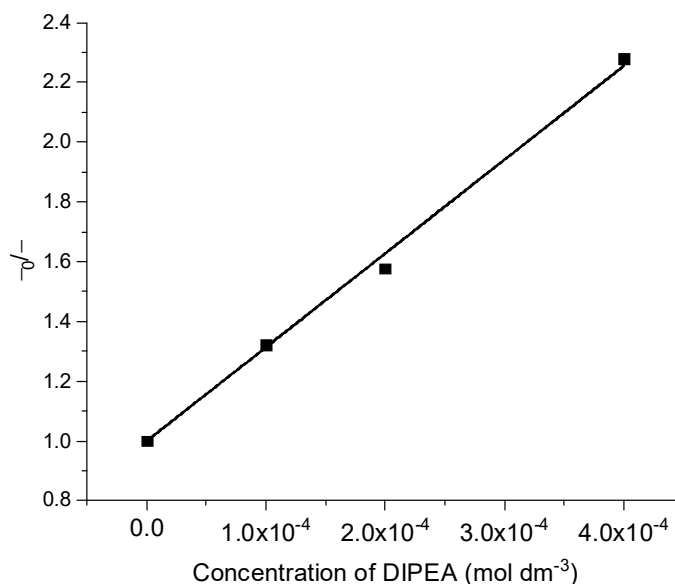

**Fig. S28.** Stern-Volmer plots of emission quenching of **Au1** ( $2 \times 10^{-5}$  mol dm<sup>-3</sup> in MeCN) by DIPEA. The  $k_q$  value was fitted to be  $7.7 \times 10^9$  dm<sup>3</sup> mol<sup>-1</sup> s<sup>-1</sup>.

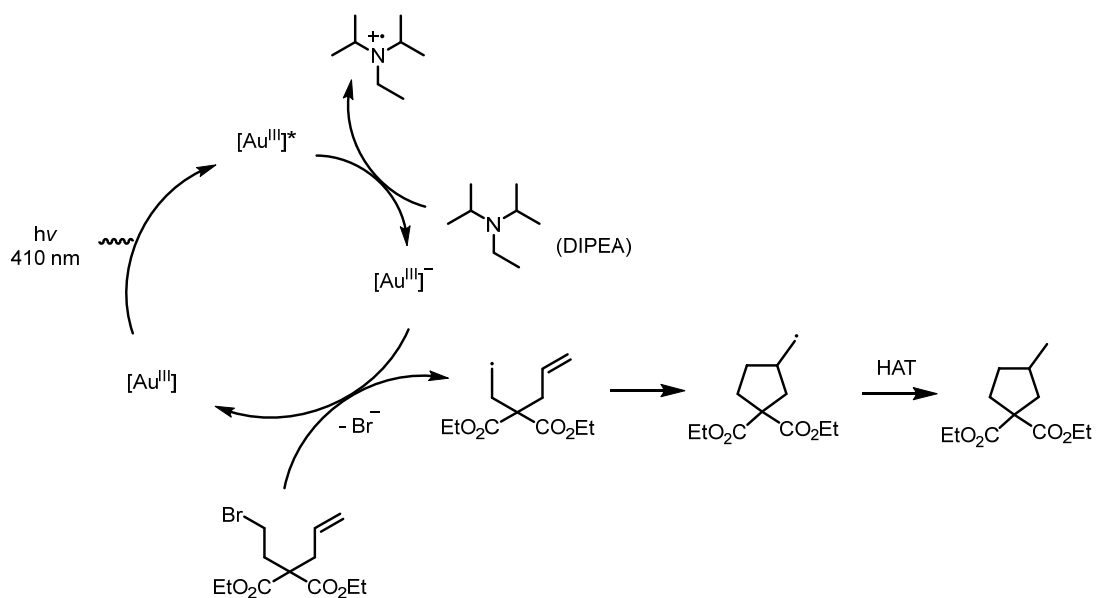

**Fig. S29.** Proposed mechanism of visible-light-driven cyclization of alkyl halide (path A).

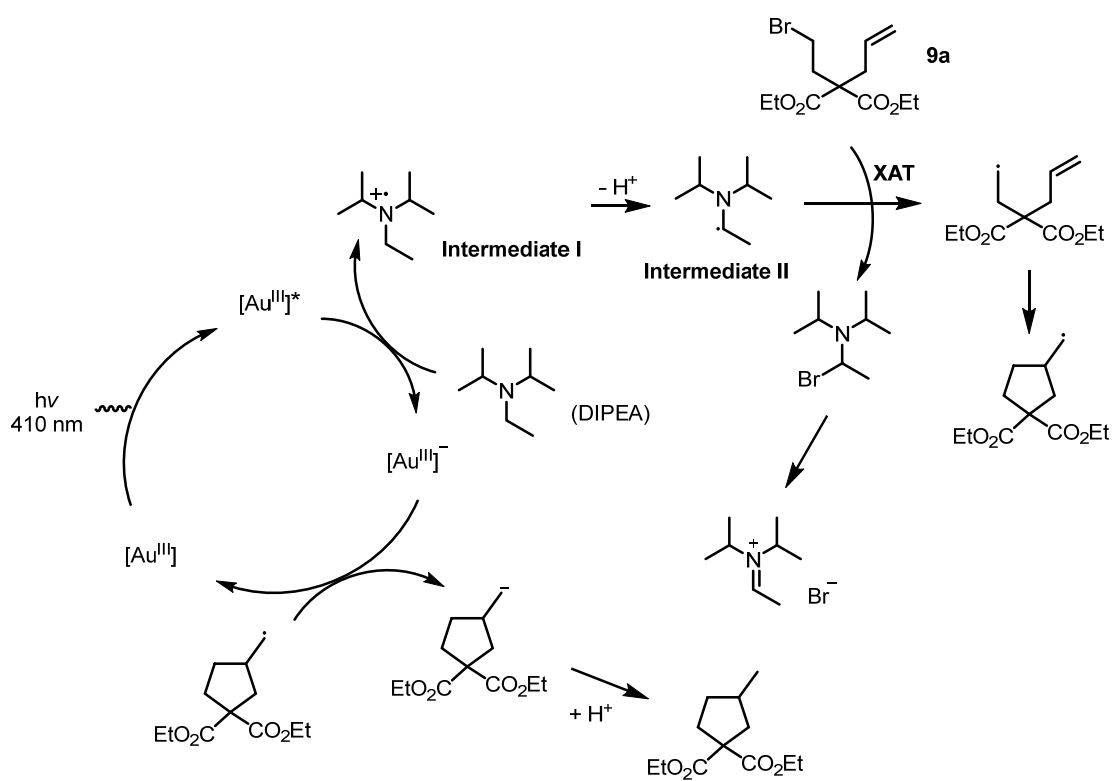

**Fig. S30.** Proposed mechanism of visible-light-driven cyclization of alkyl halide (path B).

Comparison of the anodic peak current originated from the oxidation of DIPEA before and after the addition of alkyl bromide **9a** (50 mM):

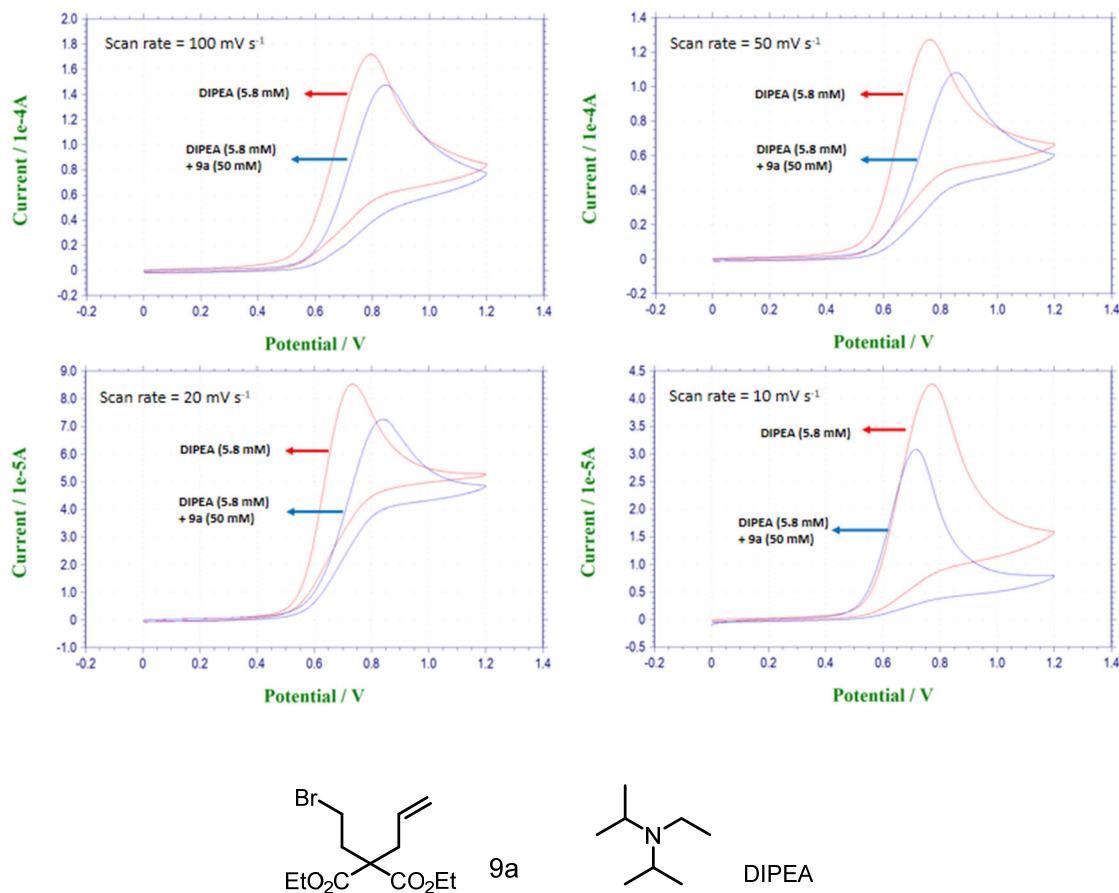

**Fig. S31.** CV experiments of DIPEA and **9a** performed under different conditions at different scan rates (20–100 mV s<sup>-1</sup>).

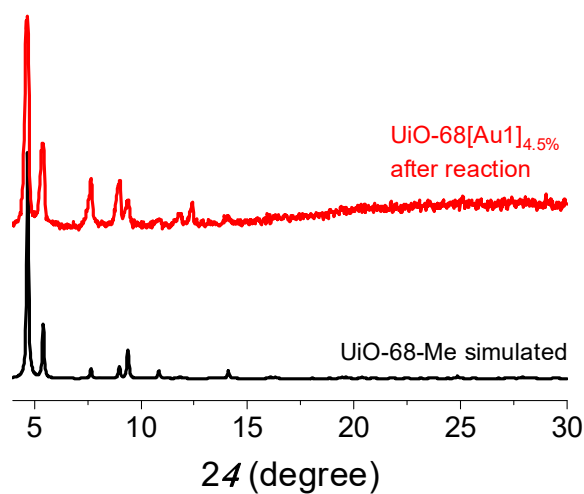

**Fig. S32.** PXRD patterns of UiO-68[Au]<sub>4.5%</sub> after the photo-induced cyclization reaction of alkyl halide.

**Table S9.** Optimization of reaction conditions for visible-light-driven cyclization of alkyl halide.

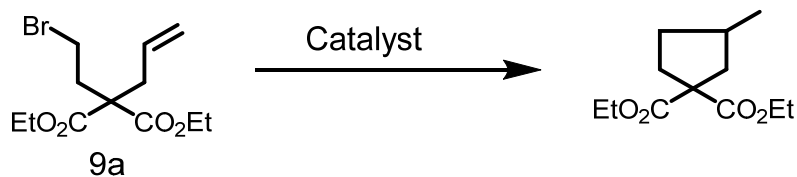

| Entry | <b>9a</b> (mmol) | Hydrogen donors | Solvent                | Yield            |
|-------|------------------|-----------------|------------------------|------------------|
| 1     | 0.1              | --              | MeCN                   | 62%              |
| 2     | 0.1              | --              | MeCN                   | 61% <sup>a</sup> |
| 3     | 0.1              | HCOOH           | MeCN                   | 45%              |
| 4     | 0.05             | CHD             | MeCN                   | Trace            |
| 5     | 0.05             | CHD             | MeCN/MeOH<br>(1:1 v/v) | 97%              |
| 6     | 0.05             | --              | MeCN/MeOH<br>(1:1 v/v) | 71%              |
| 7     | 0.05             | --              | MeOH                   | 76%              |

Reaction conditions: **9a** (1 equiv.), DIPEA (2 equiv.), 1,3-CHD (2 equiv.), 2.5 mg **UiO-68[Au1]<sub>4.5%</sub>**, 2 mL solvent, argon, 25 °C, 410 nm, 2 h (or 30 min<sup>a</sup>); Yields were determined by <sup>1</sup>H NMR using chlorodiphenylmethane as an internal standard.

## References

- 1 K.-H. Wong, K.-K. Cheung, M. C.-W. Chan, C.-M. Che, *Organometallics*, 1998, **17**(16), 3505-3511.
- 2 W.-P. To, G.-S. Tong, W. Lu, C. Ma, J. Liu, A.-L. Chow, C.-M. Che, *Angew. Chem. Int. Ed.*, 2012, **51**(11), 2654-2657.
- 3 V. K.-M. Au, K. M.-C. Wong, N. Zhu, V. W.-W. Yam, *J. Am. Chem. Soc.*, 2009, **131**(25), 9076-9085.
- 4 C. Tan, X. Han, Z. Li, Y. Liu, Y. Cui, *J. Am. Chem. Soc.*, 2018, **140**(47), 16229-16236.
- 5 E. A. Martynova, V. A. Voloshkin, S. G. Guillet, F. Bru, M. Belis, K. Van Hecke, C. S. J. Cazin, S. P. Nolan, *Chem. Sci.*, 2022, **13**(23), 6852-6857.
- 6 Z. Lu, T. P. Yoon, *Angew. Chem. Int. Ed.*, 2012, **51**(41), 10329-10332.
- 7 M. R. Becker, A. D. Richardson, C. S. Schindler, *Nat. Commun.*, 2019, **10**(1), 5095.
- 8 G. Revol, T. McCallum, M. Morin, F. Gagosz, L. Barriault, *Angew. Chem., Int. Ed.*, 2013, **52**(50), 13342-13345.
- 9 M. Chierchia, P. Xu, G. J. Lovinger, J. P. Morken, *Angew. Chem. Int. Ed.*, 2019, **58**(40), 14245-14249.
- 10 A. R. O. Venning, M. R. Kwiatkowski, J. E. Roque Peña, B. C. Lainhart, A. A. Guruparan, E. J. Alexanian, *J. Am. Chem. Soc.*, 2017, **139**(33), 11595-11600.
- 11 R. Kleinmans, T. Pinkert, S. Dutta, T. O. Paulisch, H. Keum, C. G. Daniliuc, F. Glorius, *Nature*, 2022, **605**(7910), 477-482.
- 12 S. K. Pagire, A. Hossain, L. Traub, S. Kerres, O. Reiser, *Chem. Commun.*, 2017, **53**(89), 12072-12075.
- 13 S. E. Denmark, W.-T. T. Chang, K. N. Houk, P. Liu, *J. Org. Chem.*, 2015, **80**(1), 313-366.
- 14 S. J. Rijpkema, S. Vissers, D. A. Wilson, *Chem. Commun.*, 2023, **59**(32), 4782-4785.
- 15 H. Qiu, L. Wen, J. Lv, *Synthesis*, 2022, **54**(17), 3739-3752.
- 16 Z. Liu, C. Zhou, T. Lei, X.-L. Nan, B. Chen, C.-H. Tung, L.-Z. Wu, *CCS Chem.*, 2020, **2**(1), 582-588.
- 17 C. Su, R. Tandiana, B. Tian, A. Sengupta, W. Tang, J. Su, K. P. Loh, *ACS Catal.*, 2016, **6**(6), 3594-3599.
- 18 A. Jozeliūnaitė, D. Valčekas, E. Orentas, *RSC Adv.*, 2021, **11**(7), 4104-4111.
- 19 X. Guo, B.-r. Shao, W.-f. Jiang, L. Shi, *J. Org. Chem.*, 2021, **86**(21), 15743-15752.
- 20 M. Rueping, S. Zhu, R. M. Koenigs, *Chem. Commun.*, 2011, **47**(30), 8679-8681.
- 21 C. González-Rodríguez, J. A. Varela, L. Castedo, C. Saá, *J. Am. Chem. Soc.*, 2007, **129**(43), 12916-12917.
- 22 R. T. Smith, X. Zhang, J. A. Rincón, J. Agejas, C. Mateos, M. Barberis, S. García-Cerrada, O. de Frutos, D. W. C. MacMillan, *J. Am. Chem. Soc.*, 2018, **140**(50), 17433-17438.
- 23 C. Martínez, K. Muñiz, *Angew. Chem. Int. Ed.*, 2015, **54**(28), 8287-8291.



## Single crystal data

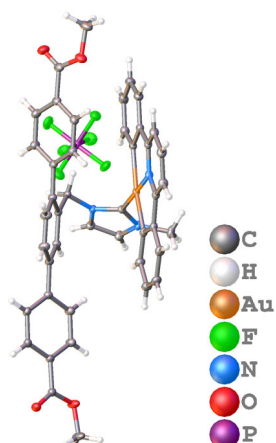

Fig. S33. Single crystal structure of Me-TPDC-[Au1].

Table S10. Crystallographic data and structure refinement details.

| Complex                                                            | Me-TPDC-[Au1]                                                                    |
|--------------------------------------------------------------------|----------------------------------------------------------------------------------|
| CCDC Number                                                        | 2376582                                                                          |
| Formula                                                            | C <sub>44</sub> H <sub>35</sub> O <sub>4</sub> N <sub>3</sub> PF <sub>6</sub> Au |
| Formula weight                                                     | 1011.68                                                                          |
| Temperature (K)                                                    | 100.0                                                                            |
| Crystal system                                                     | Monoclinic                                                                       |
| Space group                                                        | <i>P</i> 2 <sub>1</sub> / <i>c</i>                                               |
| <i>a</i> /Å                                                        | 14.4088(11)                                                                      |
| <i>b</i> /Å                                                        | 17.1693(13)                                                                      |
| <i>c</i> /Å                                                        | 16.0777(12)                                                                      |
| $\alpha$ /°                                                        | 90                                                                               |
| $\beta$ /°                                                         | 104.518(2)                                                                       |
| $\gamma$ /°                                                        | 90                                                                               |
| <i>V</i> /Å <sup>3</sup>                                           | 3850.4(5)                                                                        |
| <i>Z</i>                                                           | 4                                                                                |
| <i>D</i> <sub>c</sub> /g cm <sup>-3</sup>                          | 1.745                                                                            |
| reflns coll.                                                       | 99384                                                                            |
| unique reflns                                                      | 11497                                                                            |
| <i>R</i> <sub>int</sub>                                            | 0.0548                                                                           |
| <i>R</i> <sub>1</sub> [ <i>I</i> > 2σ( <i>I</i> )] <sup>[a]</sup>  | 0.0236                                                                           |
| <i>wR</i> <sub>2</sub> [ <i>I</i> > 2σ( <i>I</i> )] <sup>[b]</sup> | 0.0619                                                                           |
| <i>R</i> <sub>1</sub> (all data)                                   | 0.0242                                                                           |
| <i>wR</i> <sub>2</sub> (all data)                                  | 0.0623                                                                           |
| GOF                                                                | 1.067                                                                            |

<sup>[a]</sup>  $R_1 = \sum ||F_o| - F_c| / \sum |F_o|$ . <sup>[b]</sup>  $wR_2 = [\sum [w(F_o^2 - F_c^2)^2] / \sum [(F_o^2)^2]]^{1/2}$

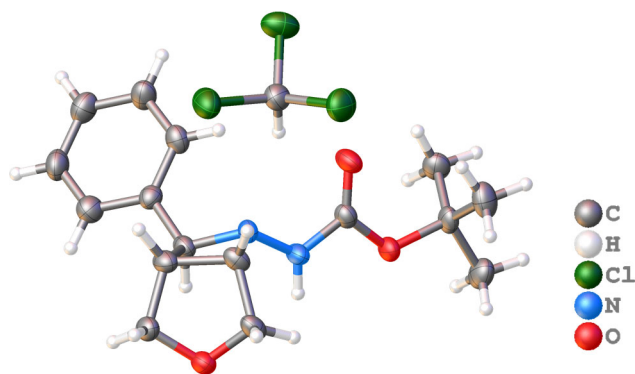

**Fig. S34.** Single crystal structure of **4f**.

**Table S11.** Crystallographic data and structure refinement details.

| Complex                                                            | <b>4f</b>                                                                     |
|--------------------------------------------------------------------|-------------------------------------------------------------------------------|
| CCDC Number                                                        | 2376581                                                                       |
| Formula                                                            | C <sub>17</sub> H <sub>23</sub> Cl <sub>3</sub> N <sub>2</sub> O <sub>3</sub> |
| Formula weight                                                     | 409.72                                                                        |
| Temperature (K)                                                    | 100.0                                                                         |
| Crystal system                                                     | Triclinic                                                                     |
| Space group                                                        | <i>P</i> -1                                                                   |
| <i>a</i> /Å                                                        | 10.7577(7)                                                                    |
| <i>b</i> /Å                                                        | 12.0667(8)                                                                    |
| <i>c</i> /Å                                                        | 16.1638(9)                                                                    |
| $\alpha$ /°                                                        | 92.851(3)                                                                     |
| $\beta$ /°                                                         | 97.765(3)                                                                     |
| $\gamma$ /°                                                        | 101.579(3)                                                                    |
| <i>V</i> /Å <sup>3</sup>                                           | 2030.3(2)                                                                     |
| <i>Z</i>                                                           | 4                                                                             |
| <i>D<sub>c</sub></i> /g cm <sup>-3</sup>                           | 1.340                                                                         |
| reflns coll.                                                       | 44831                                                                         |
| unique reflns                                                      | 6929                                                                          |
| <i>R</i> <sub>int</sub>                                            | 0.1421                                                                        |
| <i>R</i> <sub>1</sub> [ <i>I</i> > 2σ( <i>I</i> )] <sup>[a]</sup>  | 0.0637                                                                        |
| <i>wR</i> <sub>2</sub> [ <i>I</i> > 2σ( <i>I</i> )] <sup>[b]</sup> | 0.1551                                                                        |
| <i>R</i> <sub>1</sub> (all data)                                   | 0.1180                                                                        |
| <i>wR</i> <sub>2</sub> (all data)                                  | 0.1863                                                                        |
| GOF                                                                | 1.018                                                                         |

<sup>[a]</sup>  $R_1 = \sum ||F_o| - F_c| / \sum |F_o|$ . <sup>[b]</sup>  $wR_2 = [\sum [w(F_o^2 - F_c^2)^2] / \sum [(F_o^2)^2]]^{1/2}$

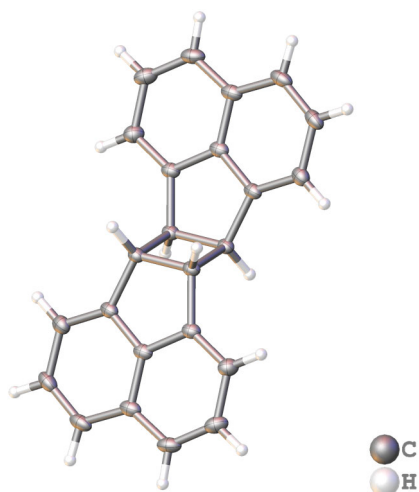

**Fig. S35.** Single crystal structure of **7c**.

**Table S12.** Crystallographic data and structure refinement details.

| Complex                                                            | <b>7c</b>                          |
|--------------------------------------------------------------------|------------------------------------|
| CCDC Number                                                        | 2376583                            |
| Formula                                                            | C <sub>24</sub> H <sub>16</sub>    |
| Formula weight                                                     | 304.37                             |
| Temperature (K)                                                    | 100.0(2)                           |
| Crystal system                                                     | Monoclinic                         |
| Space group                                                        | <i>P</i> 2 <sub>1</sub> / <i>n</i> |
| <i>a</i> /Å                                                        | 7.7763(7)                          |
| <i>b</i> /Å                                                        | 4.8289(4)                          |
| <i>c</i> /Å                                                        | 20.0609(18)                        |
| $\alpha$ /°                                                        | 90                                 |
| $\beta$ /°                                                         | 92.476(4)                          |
| $\gamma$ /°                                                        | 90                                 |
| <i>V</i> /Å <sup>3</sup>                                           | 752.60(11)                         |
| <i>Z</i>                                                           | 2                                  |
| <i>D<sub>c</sub></i> /g cm <sup>-3</sup>                           | 1.343                              |
| reflns coll.                                                       | 16840                              |
| unique reflns                                                      | 1871                               |
| <i>R</i> <sub>int</sub>                                            | 0.0666                             |
| <i>R</i> <sub>1</sub> [ <i>I</i> > 2σ( <i>I</i> )] <sup>[a]</sup>  | 0.0432                             |
| <i>wR</i> <sub>2</sub> [ <i>I</i> > 2σ( <i>I</i> )] <sup>[b]</sup> | 0.1175                             |
| <i>R</i> <sub>1</sub> (all data)                                   | 0.0483                             |
| <i>wR</i> <sub>2</sub> (all data)                                  | 0.1214                             |
| GOF                                                                | 1.060                              |

<sup>[a]</sup>  $R_1 = \sum ||F_o| - F_c| / \sum |F_o|$ . <sup>[b]</sup>  $wR_2 = [\sum [w(F_o^2 - F_c^2)^2] / \sum [(F_o^2)^2]]^{1/2}$

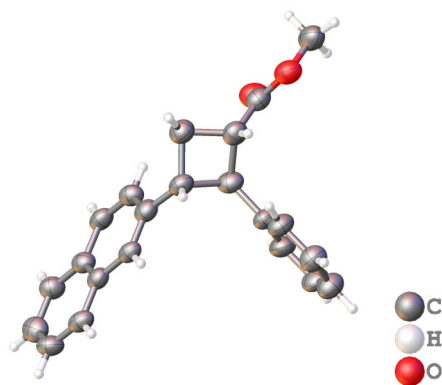

**Fig. S36.** Single crystal structure of **7g**.

**Table S13.** Crystallographic data and structure refinement details.

| Complex                                                            | <b>7g</b>                                      |
|--------------------------------------------------------------------|------------------------------------------------|
| CCDC Number                                                        | 2376584                                        |
| Formula                                                            | C <sub>22</sub> H <sub>20</sub> O <sub>2</sub> |
| Formula weight                                                     | 316.38                                         |
| Temperature (K)                                                    | 100.0(2)                                       |
| Crystal system                                                     | Monoclinic                                     |
| Space group                                                        | <i>P</i> 2 <sub>1</sub> / <i>c</i>             |
| <i>a</i> /Å                                                        | 8.8211(4)                                      |
| <i>b</i> /Å                                                        | 5.6037(2)                                      |
| <i>c</i> /Å                                                        | 34.2588(14)                                    |
| $\alpha$ /°                                                        | 90                                             |
| $\beta$ /°                                                         | 94.5040(10)                                    |
| $\gamma$ /°                                                        | 90                                             |
| <i>V</i> /Å <sup>3</sup>                                           | 1688.21(12)                                    |
| <i>Z</i>                                                           | 4                                              |
| <i>D<sub>c</sub></i> /g cm <sup>-3</sup>                           | 1.245                                          |
| reflns coll.                                                       | 50854                                          |
| unique reflns                                                      | 4900                                           |
| <i>R</i> <sub>int</sub>                                            | 0.0591                                         |
| <i>R</i> <sub>1</sub> [ <i>I</i> > 2σ( <i>I</i> )] <sup>[a]</sup>  | 0.0401                                         |
| <i>wR</i> <sub>2</sub> [ <i>I</i> > 2σ( <i>I</i> )] <sup>[b]</sup> | 0.1134                                         |
| <i>R</i> <sub>1</sub> (all data)                                   | 0.0420                                         |
| <i>wR</i> <sub>2</sub> (all data)                                  | 0.1155                                         |
| GOF                                                                | 1.058                                          |

<sup>[a]</sup>  $R_1 = \sum ||F_o| - F_c| / \sum |F_o|$ . <sup>[b]</sup>  $wR_2 = [\sum [w(F_o^2 - F_c^2)^2] / \sum [(F_o^2)^2]]^{1/2}$

# NMR spectra

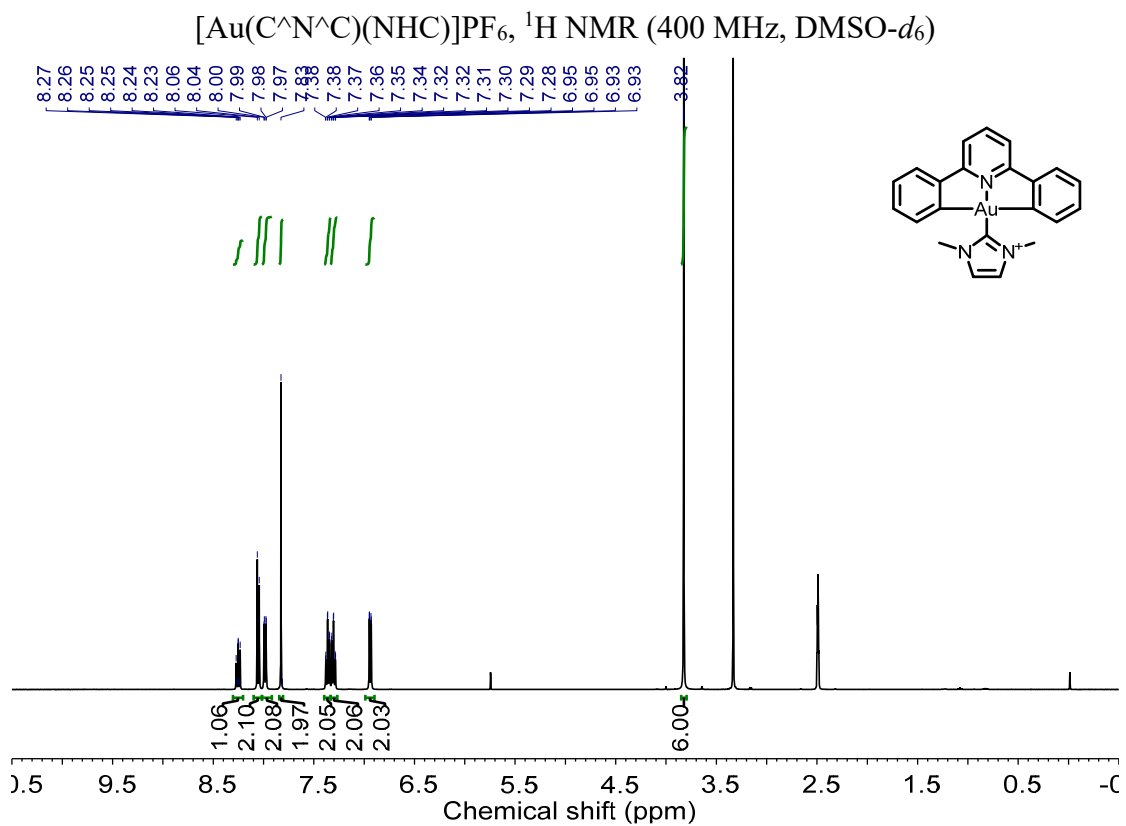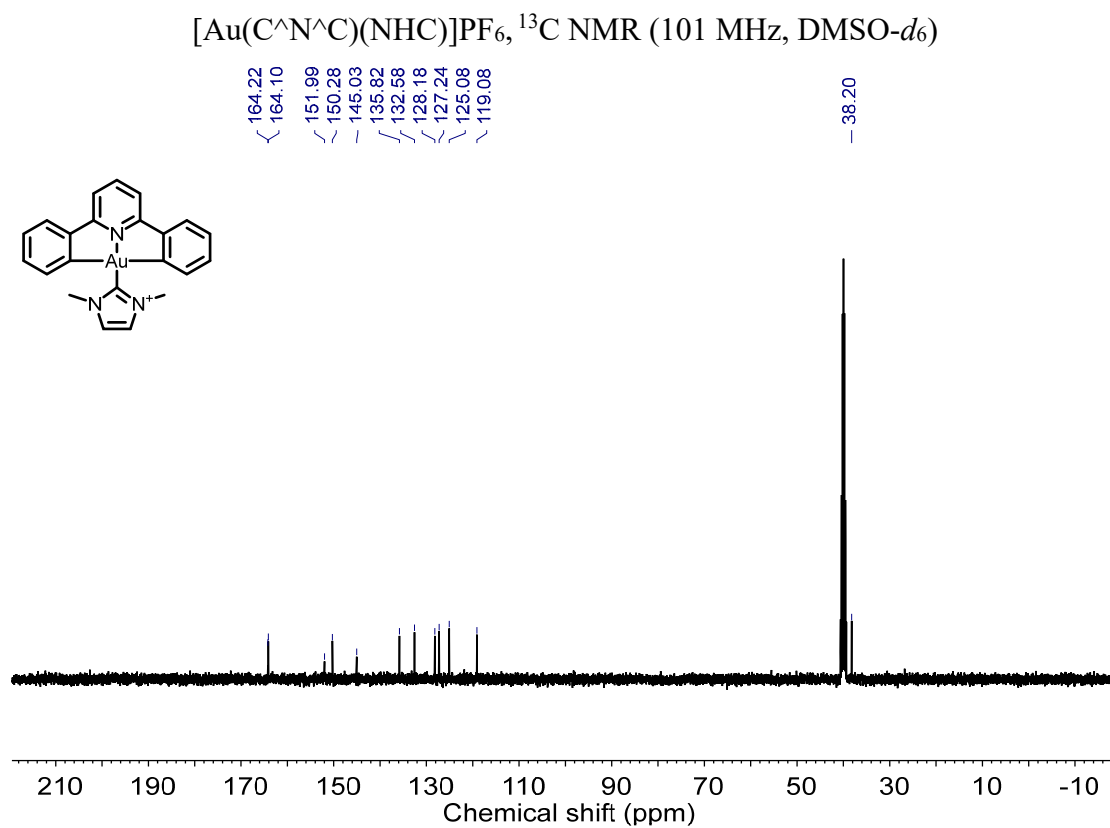

S1, <sup>1</sup>H NMR (500 MHz, CDCl<sub>3</sub>)

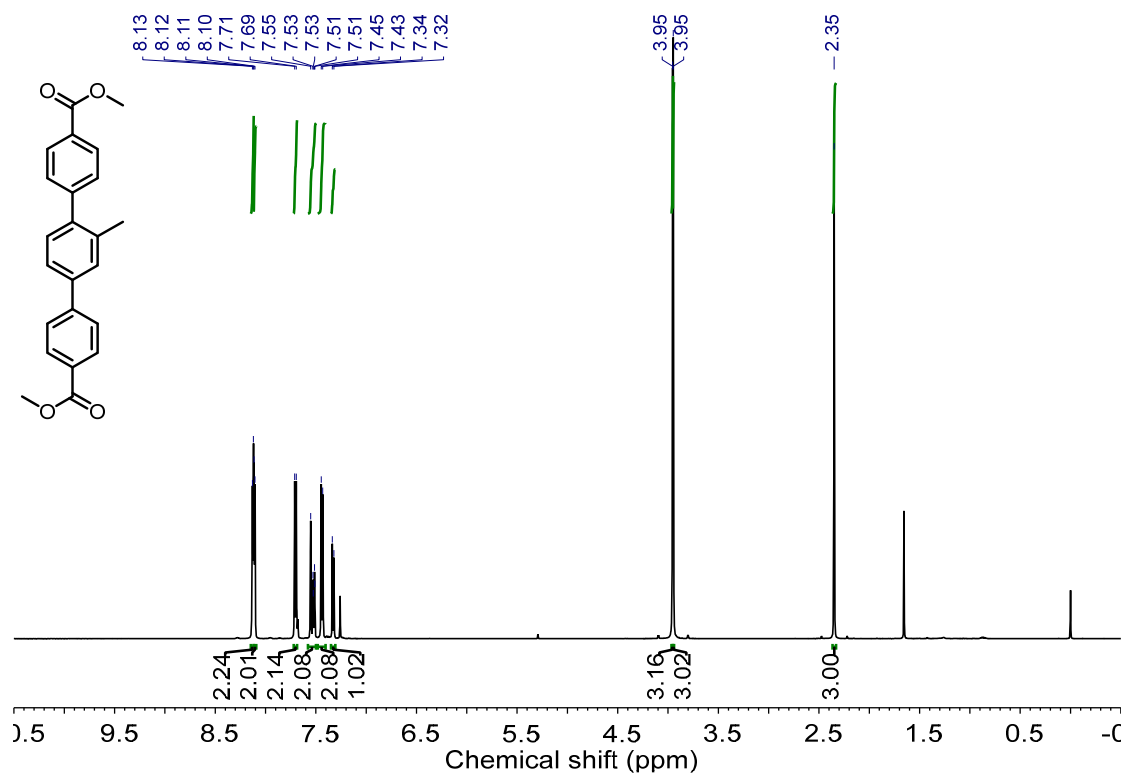

S1, <sup>13</sup>C NMR (126 MHz, CDCl<sub>3</sub>)

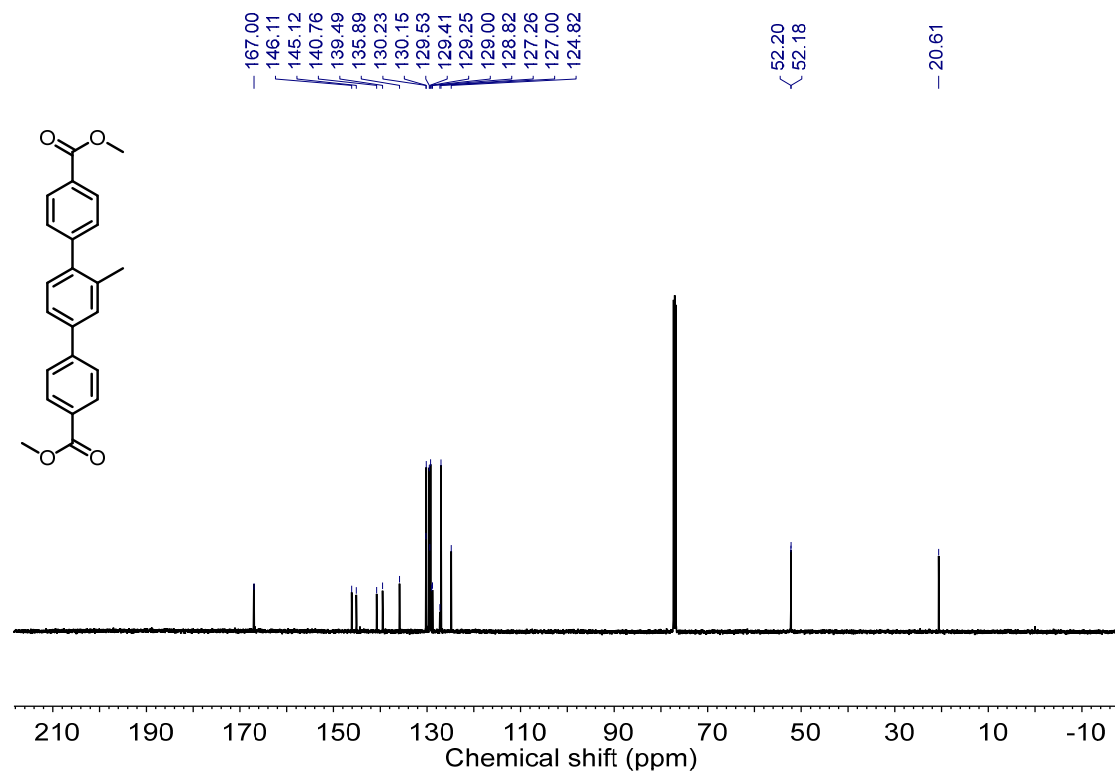

S2, <sup>1</sup>H NMR (600 MHz, DMSO-*d*<sub>6</sub>)

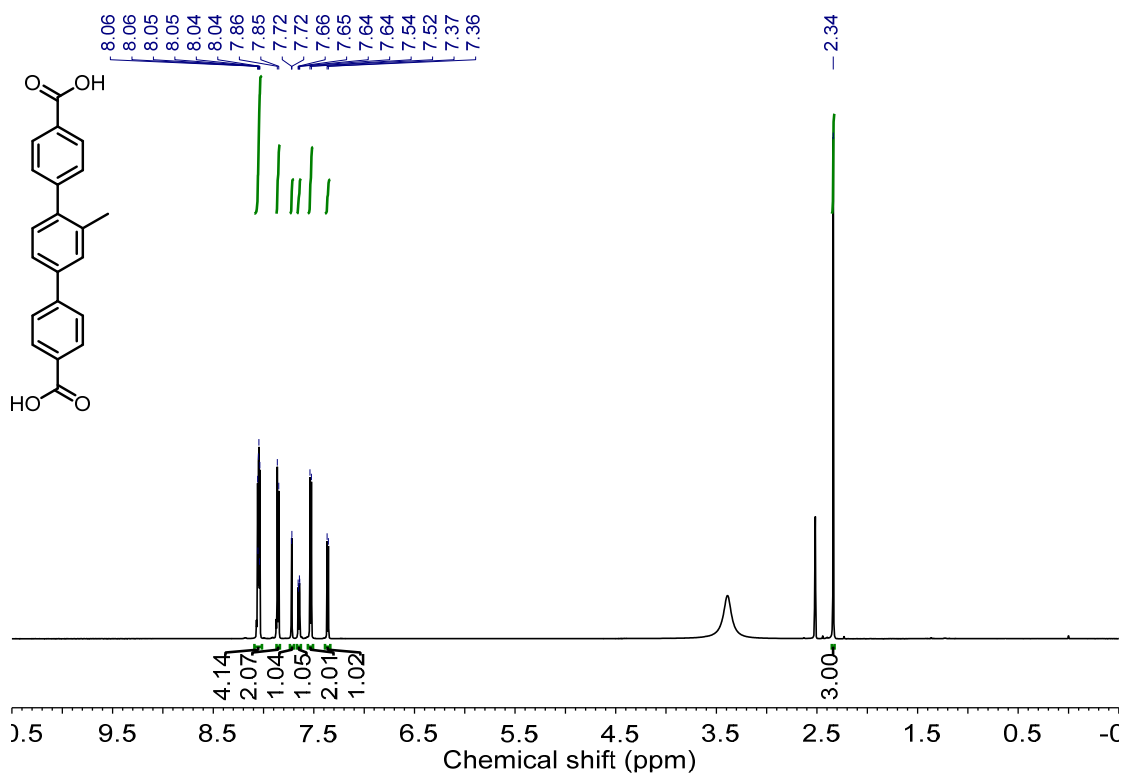

S2, <sup>13</sup>C NMR (151 MHz, DMSO-*d*<sub>6</sub>)

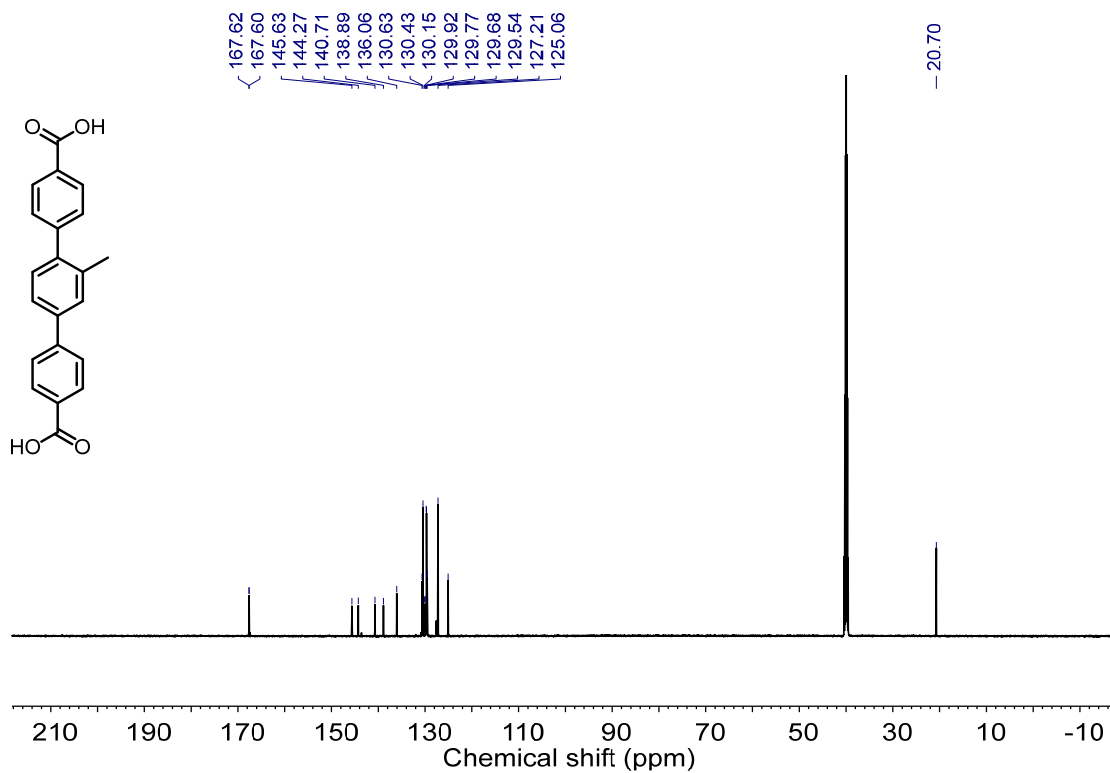

S3,  $^1\text{H}$  NMR (500 MHz,  $\text{CDCl}_3$ )

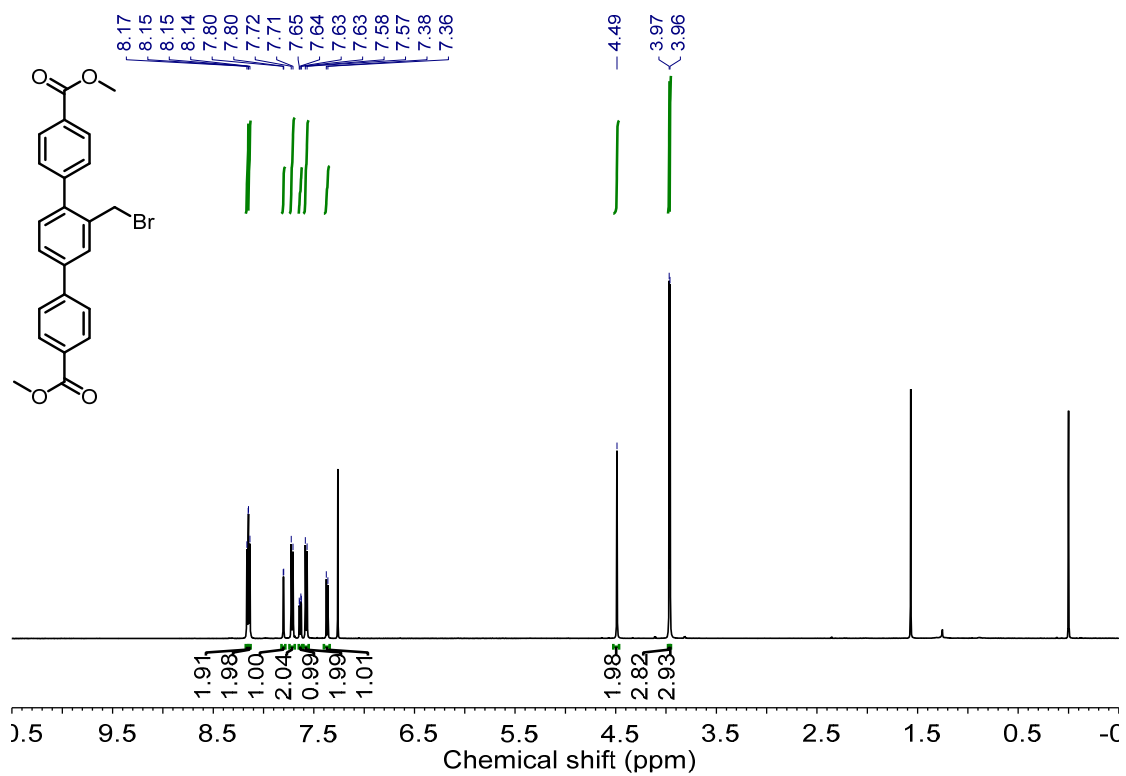

S3,  $^{13}\text{C}$  NMR (101 MHz,  $\text{CDCl}_3$ )

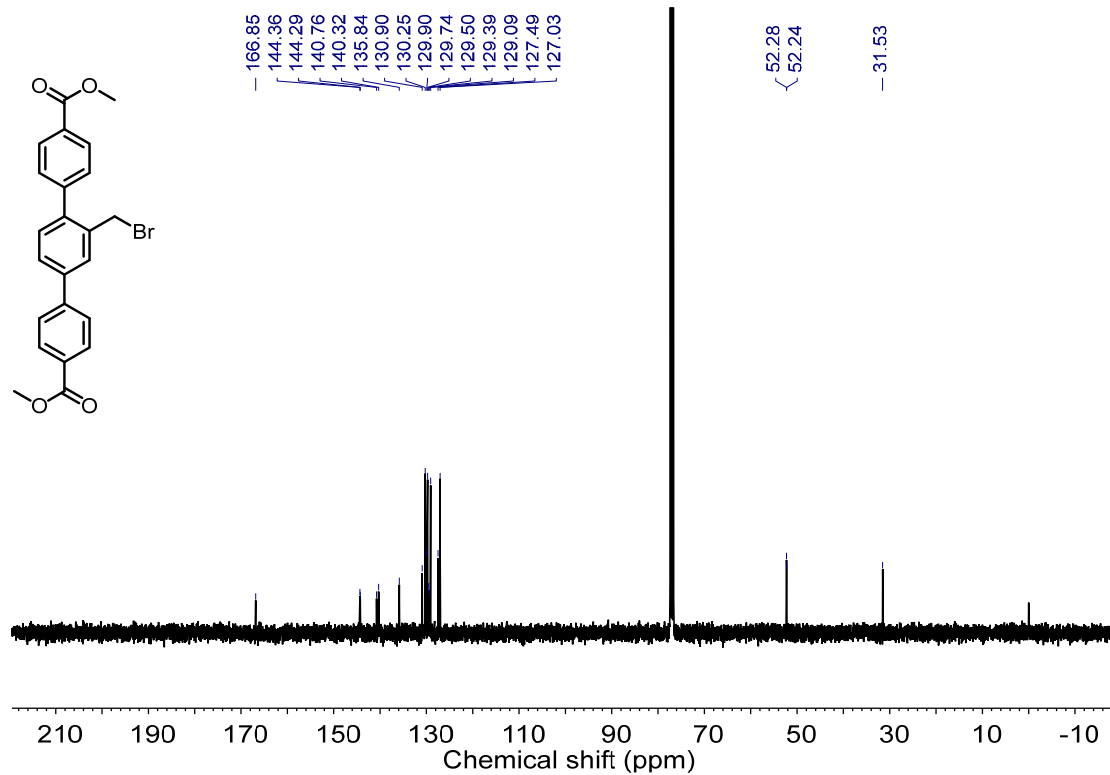



S4,  $^1\text{H}$  NMR (500 MHz,  $\text{CDCl}_3$ )

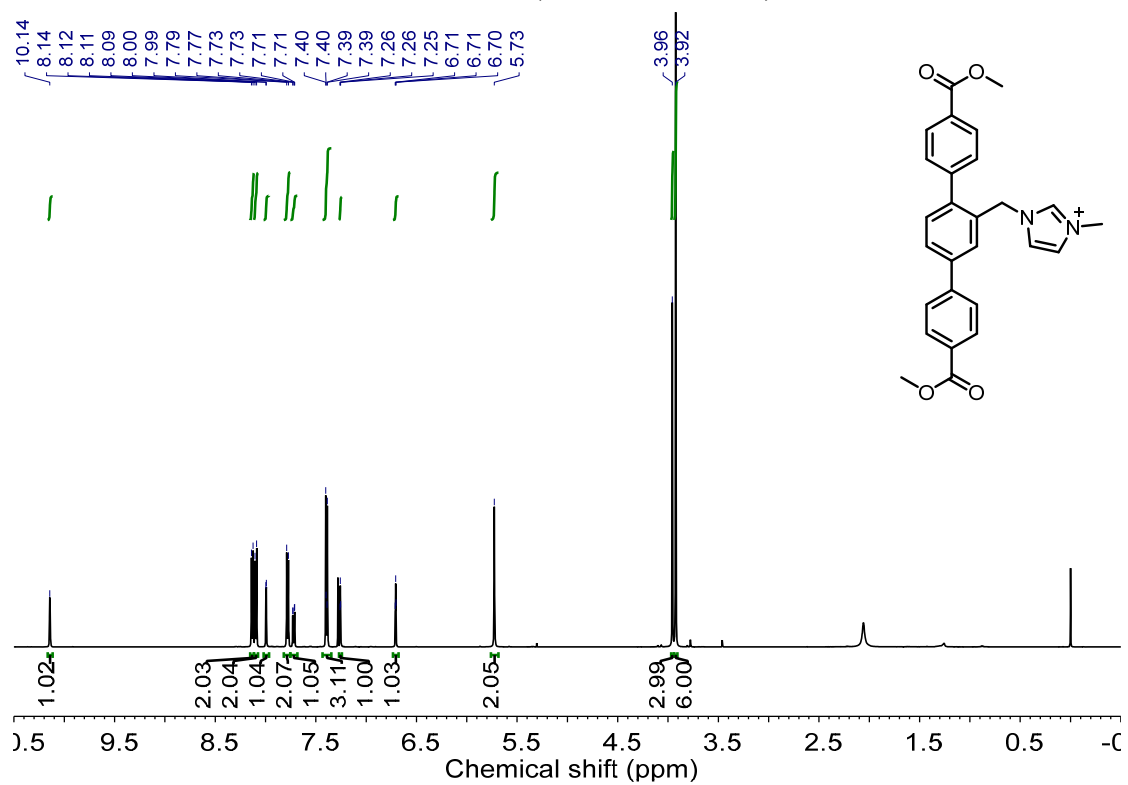

S4,  $^{13}\text{C}$  NMR (126 MHz,  $\text{CDCl}_3$ )

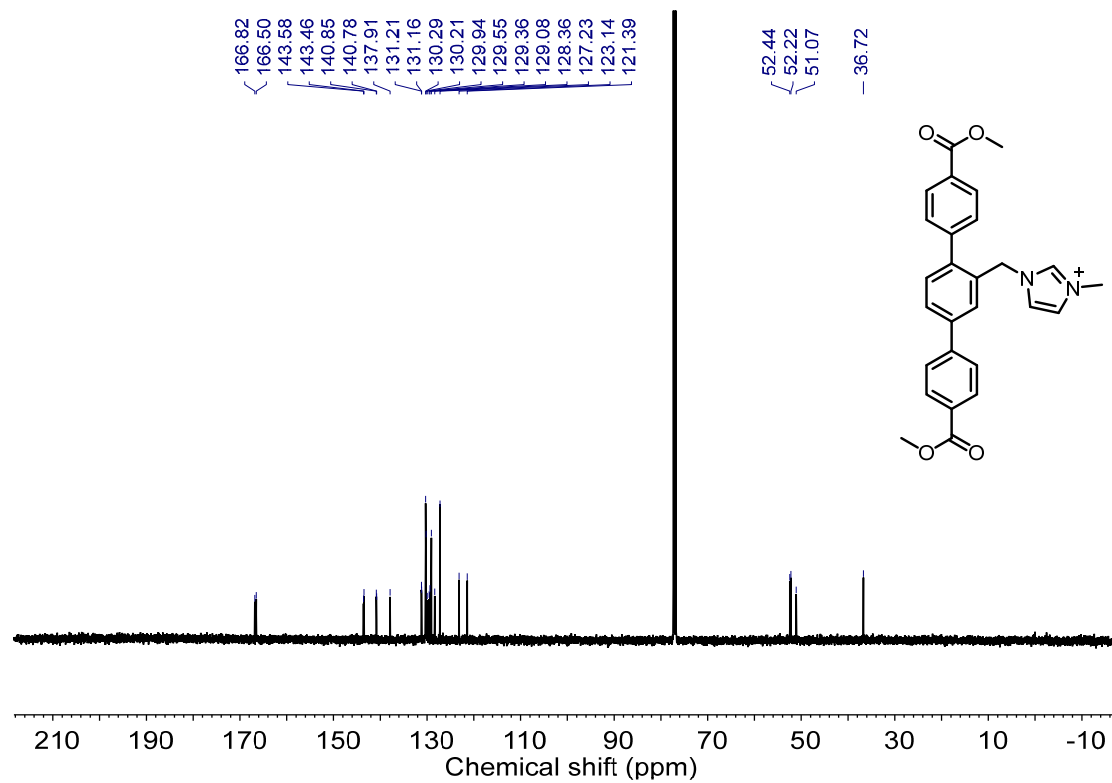

S5,  $^1\text{H}$  NMR (400 MHz,  $\text{CDCl}_3$ )

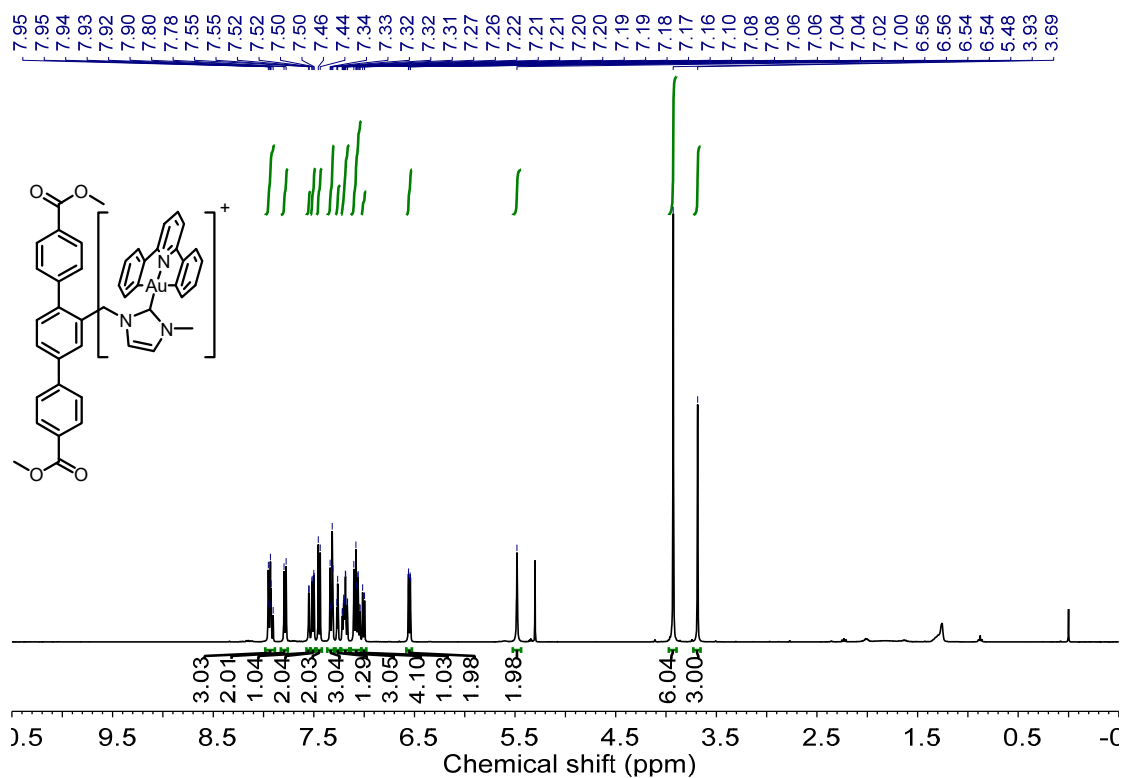

S5,  $^{13}\text{C}$  NMR (101 MHz,  $\text{CDCl}_3$ )

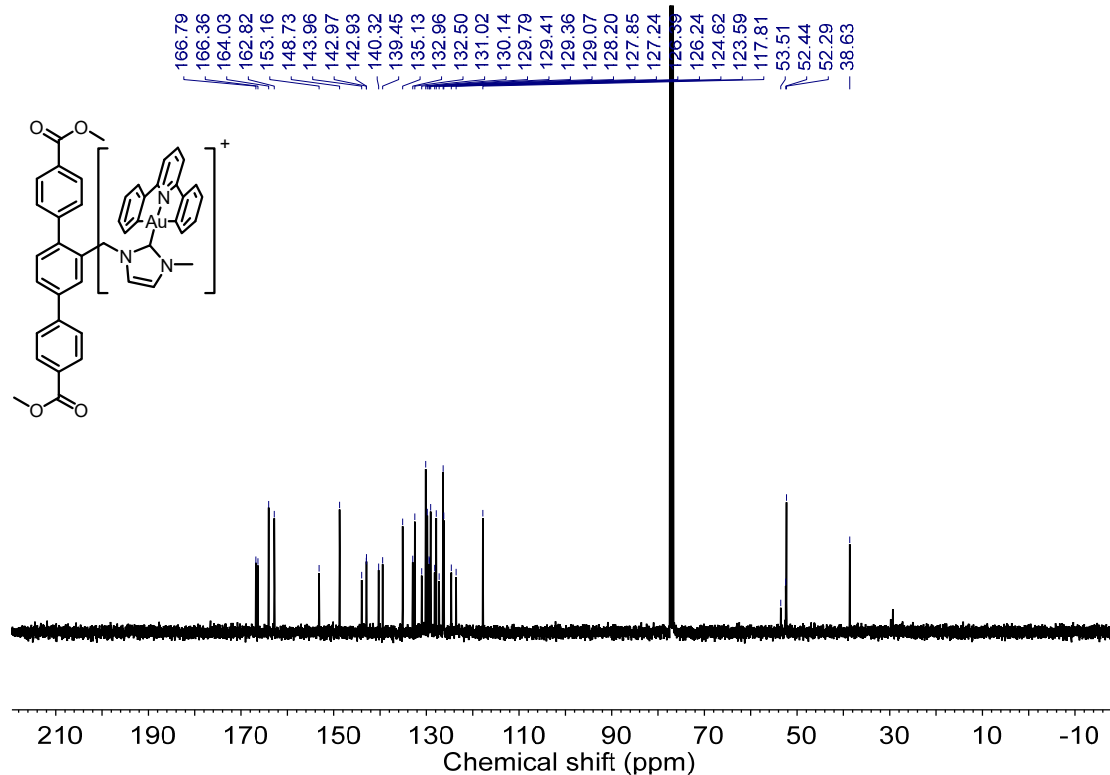

S6, <sup>1</sup>H NMR (600 MHz, K<sub>3</sub>PO<sub>4</sub>/D<sub>2</sub>O/DMSO-*d*<sub>6</sub>)

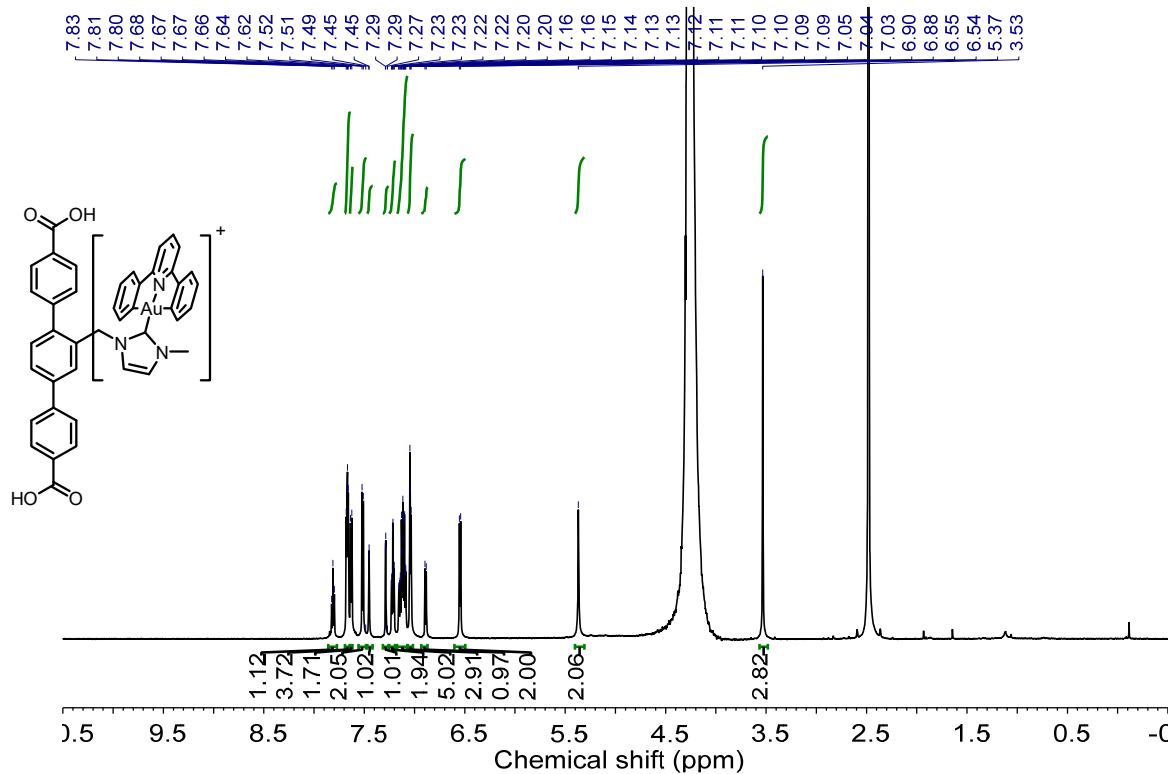

S6, <sup>13</sup>C NMR (151 MHz, K<sub>3</sub>PO<sub>4</sub>/D<sub>2</sub>O/DMSO-*d*<sub>6</sub>)

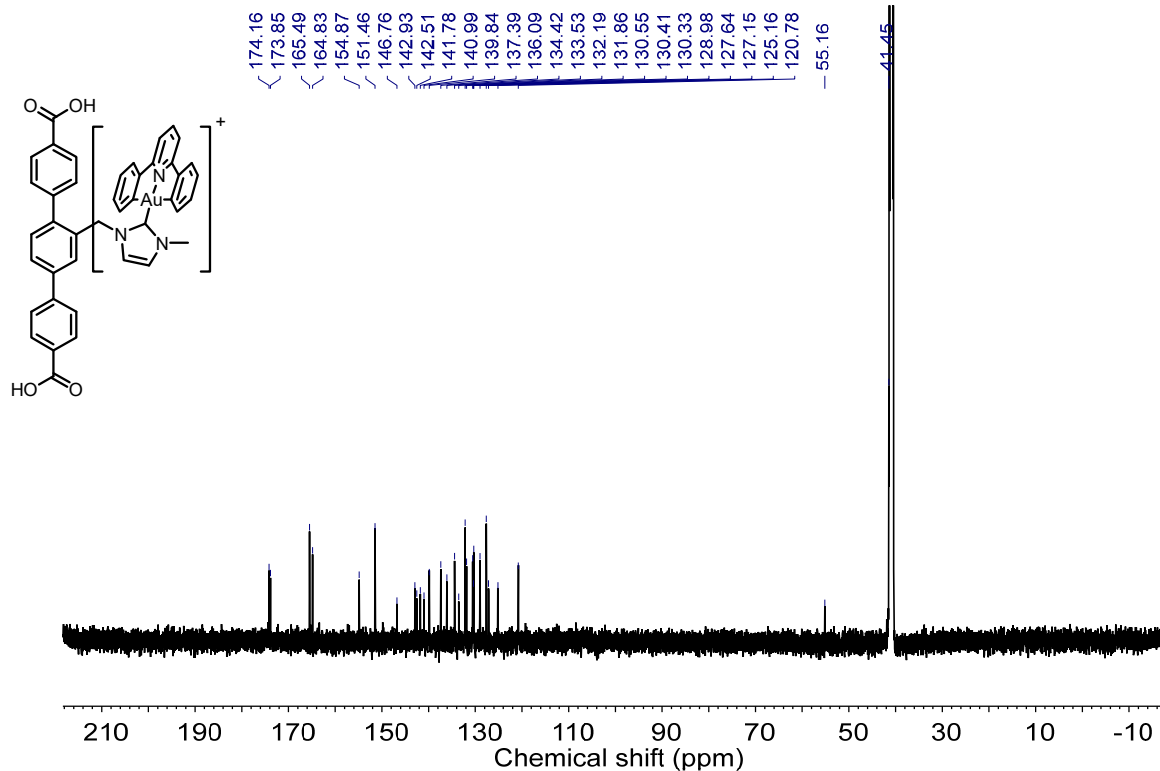

S7, <sup>1</sup>H NMR (400 MHz, MeCN-d<sub>3</sub>)

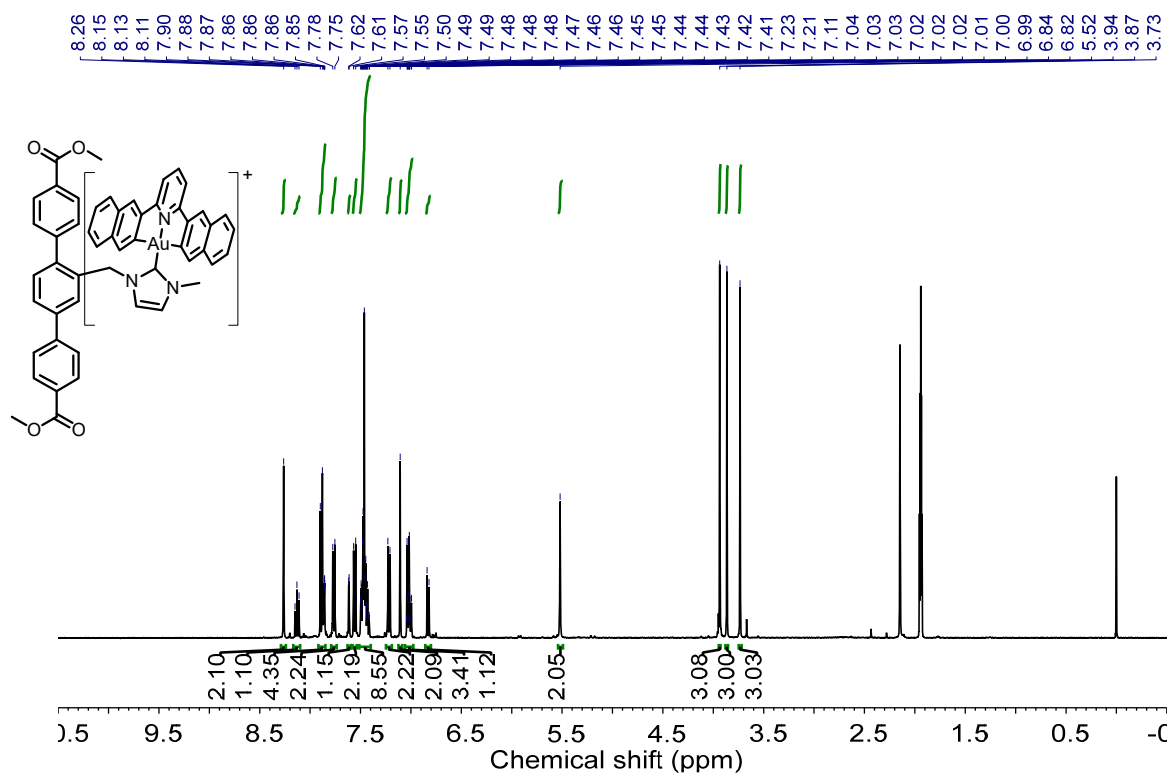

S7, <sup>13</sup>C NMR (101 MHz, MeCN-d<sub>3</sub>)

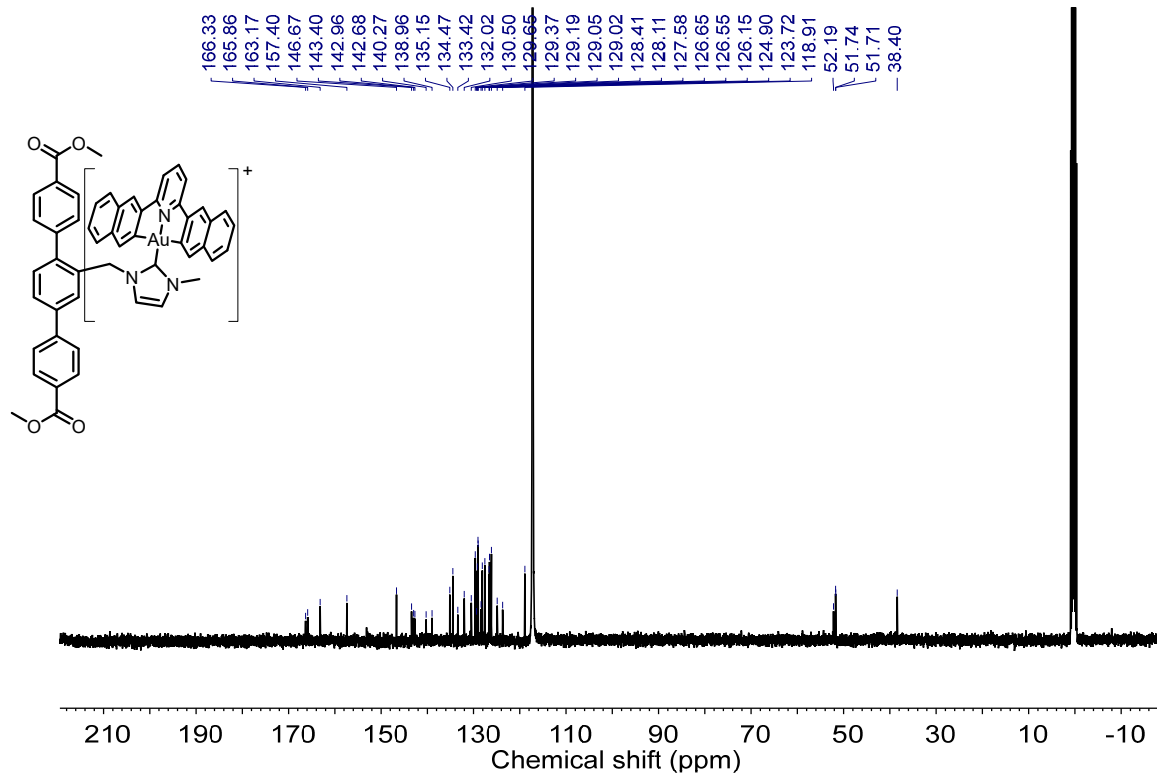

S8,  $^1\text{H}$  NMR (600 MHz,  $\text{K}_3\text{PO}_4/\text{D}_2\text{O}/\text{DMSO-}d_6$ )

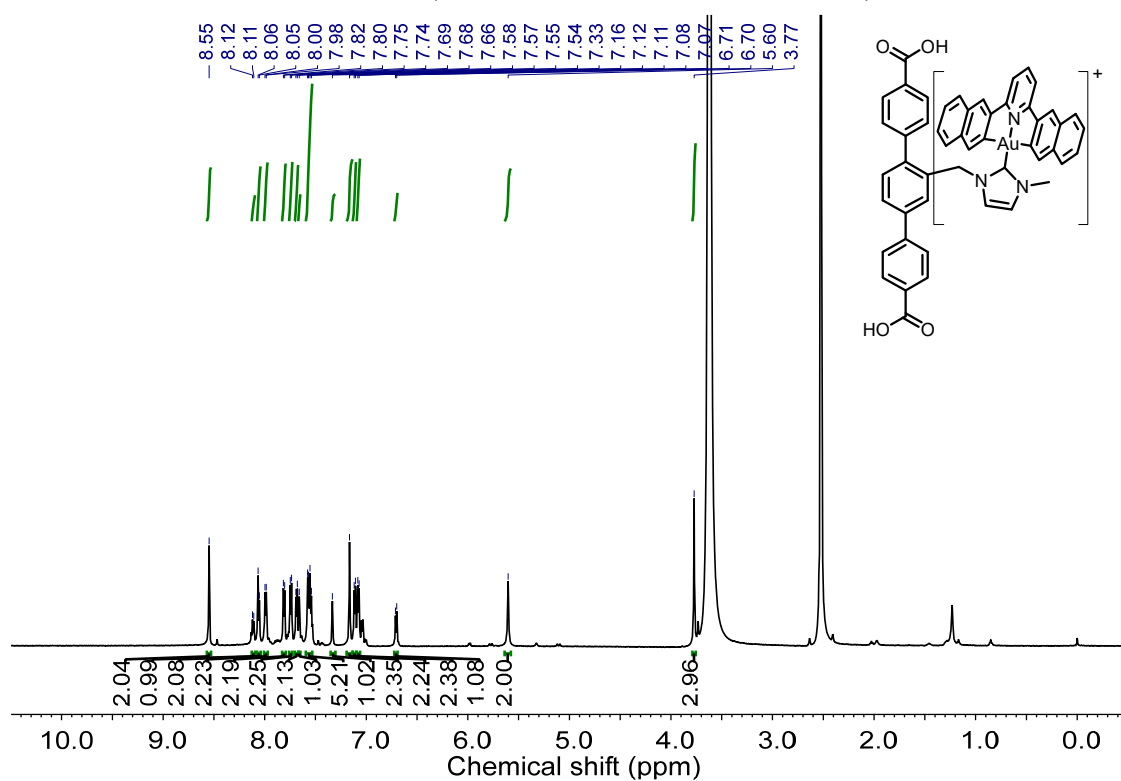

S8,  $^{13}\text{C}$  NMR (151 MHz,  $\text{K}_3\text{PO}_4/\text{D}_2\text{O}/\text{DMSO-}d_6$ )

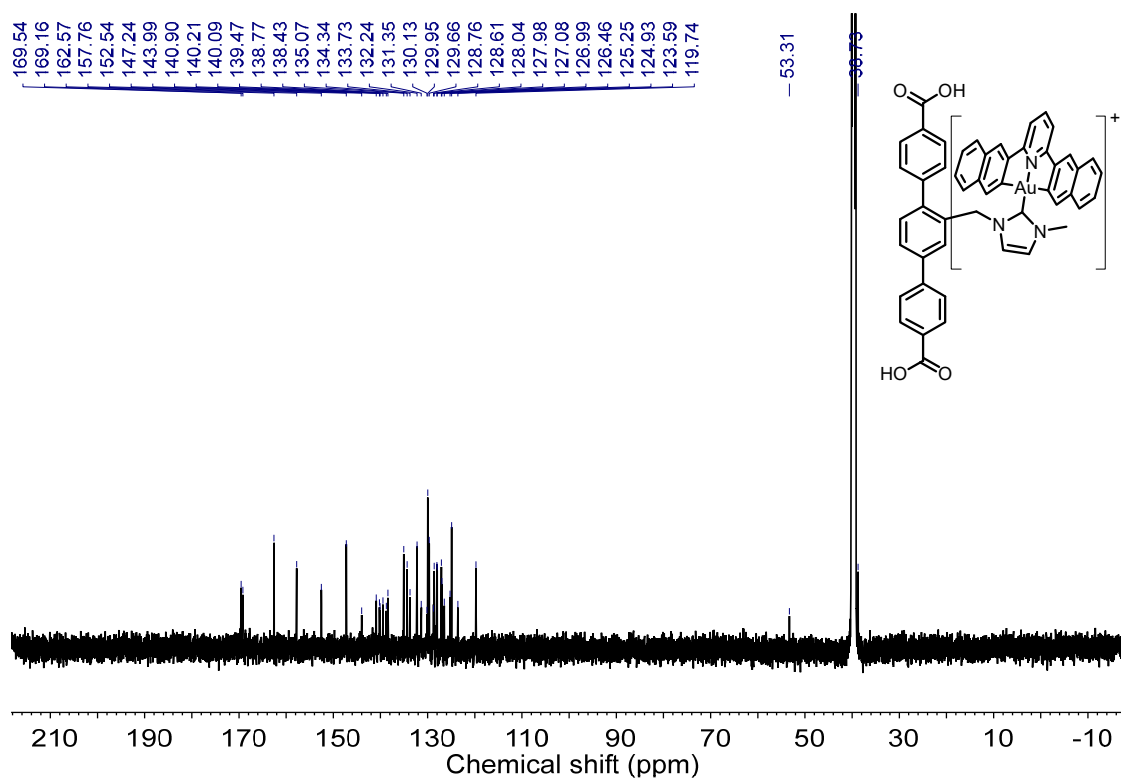

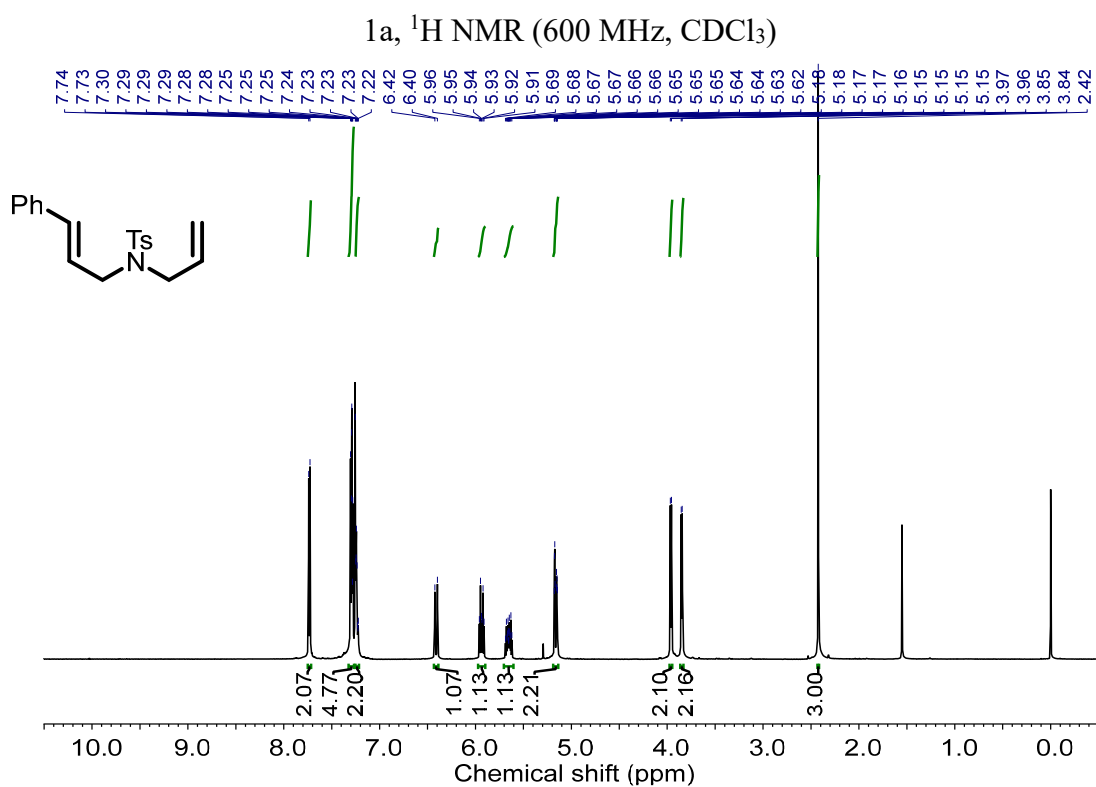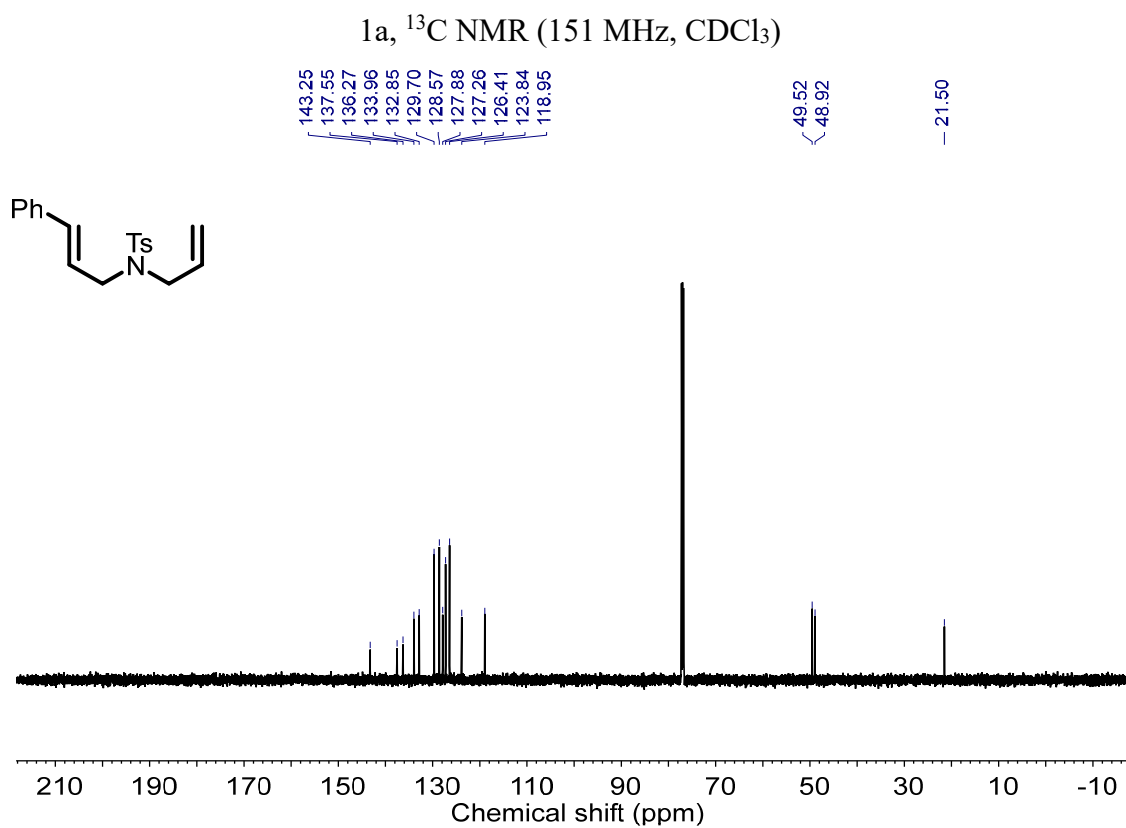

1b, <sup>1</sup>H NMR (600 MHz, CDCl<sub>3</sub>)

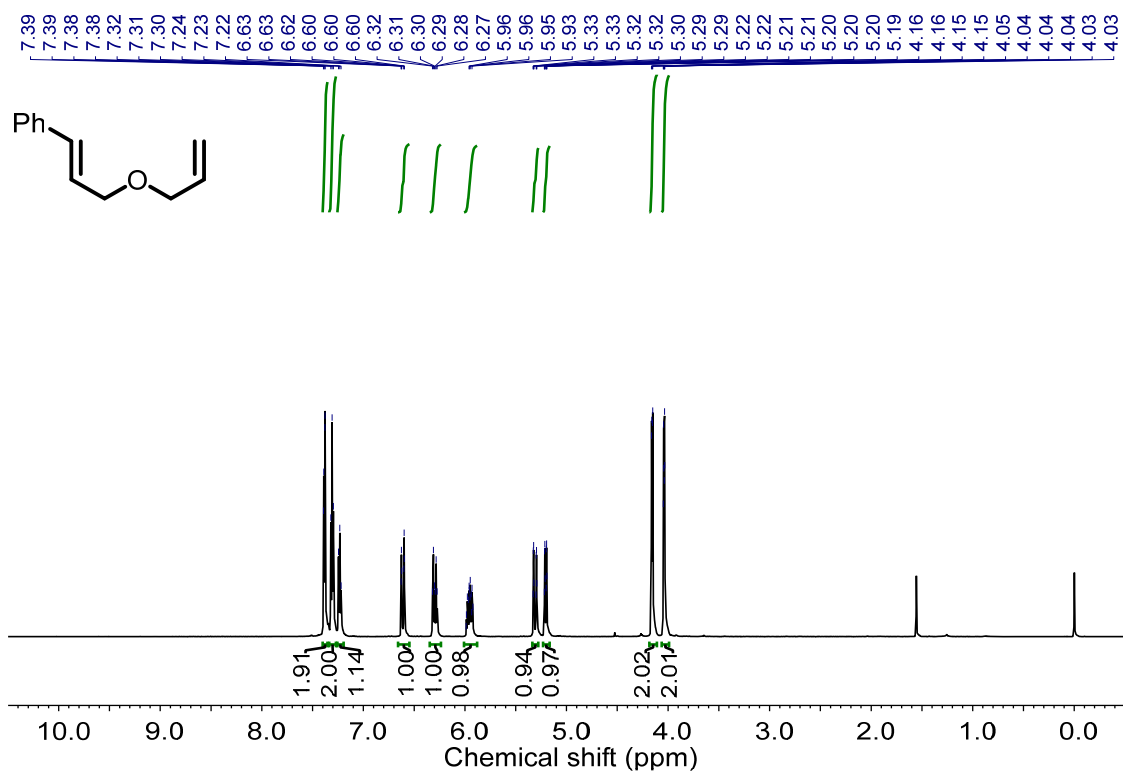

1b, <sup>13</sup>C NMR (151 MHz, CDCl<sub>3</sub>)

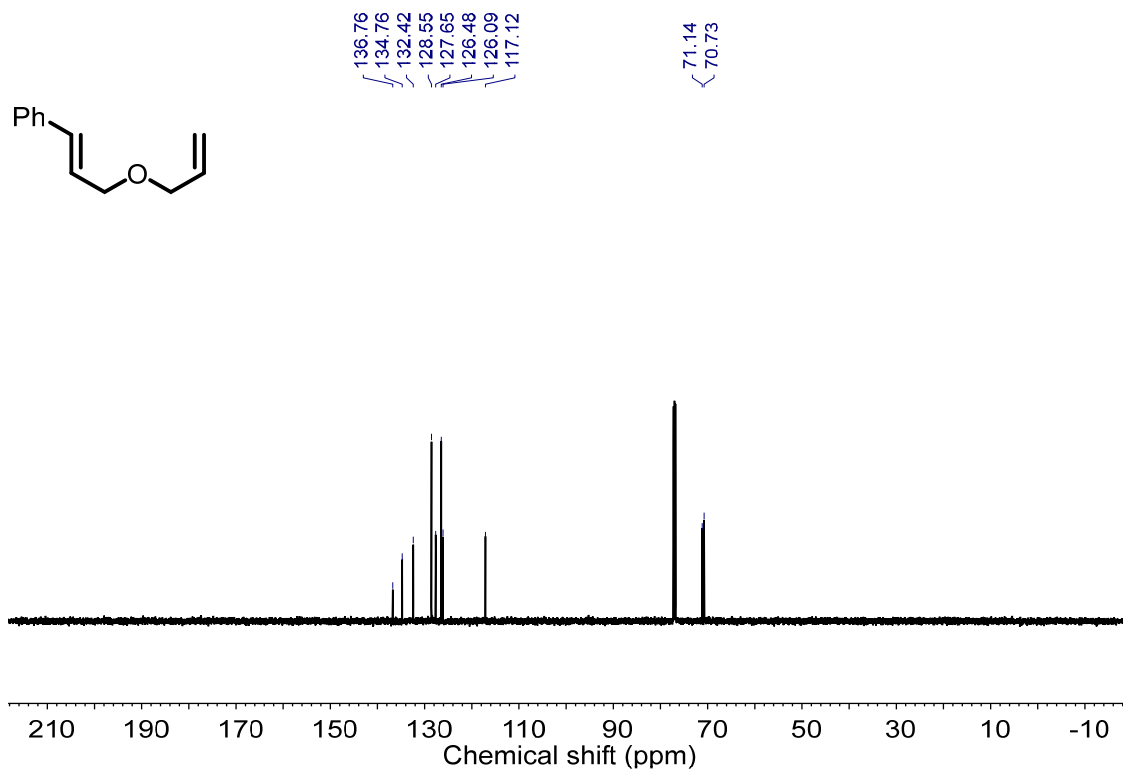

1c,  $^1\text{H}$  NMR (600 MHz,  $\text{CDCl}_3$ )

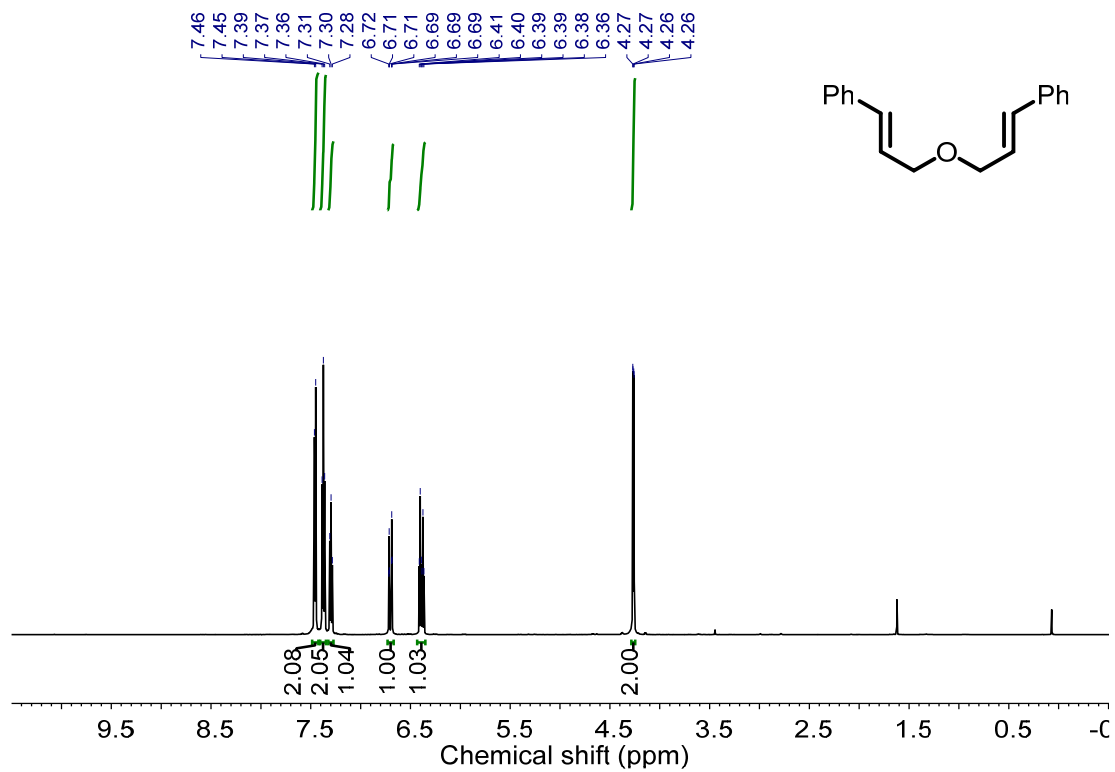

1c,  $^{13}\text{C}$  NMR (151 MHz,  $\text{CDCl}_3$ )

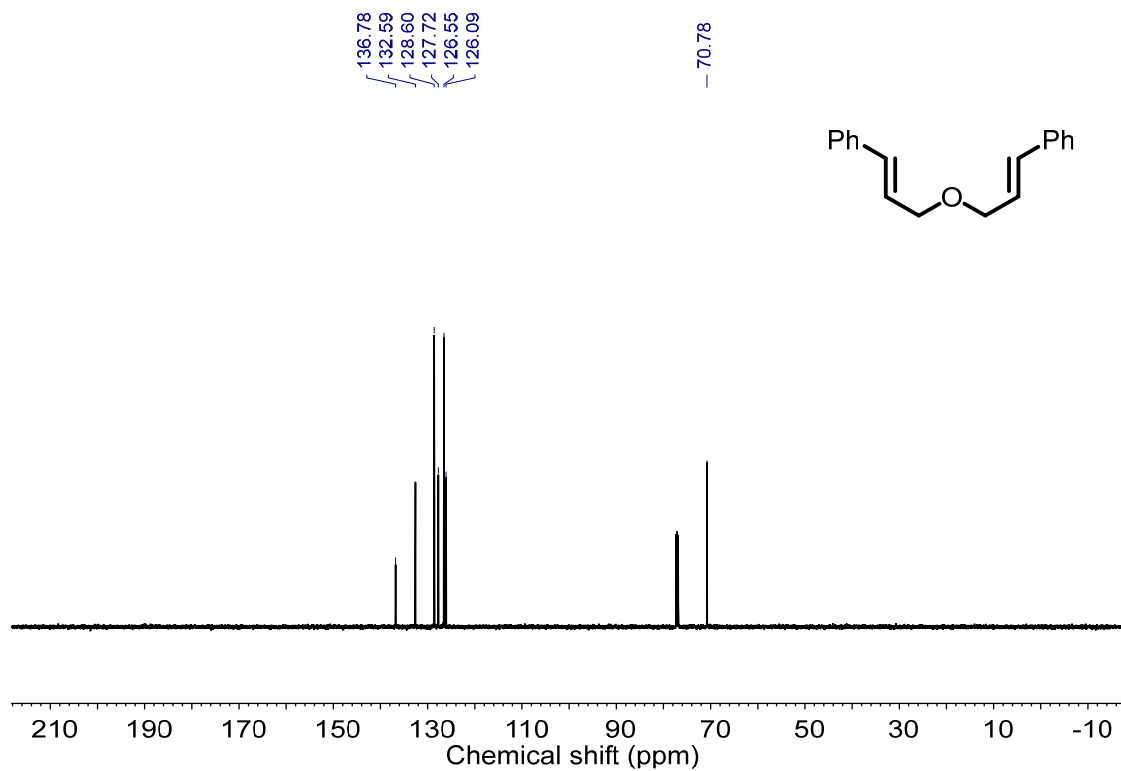



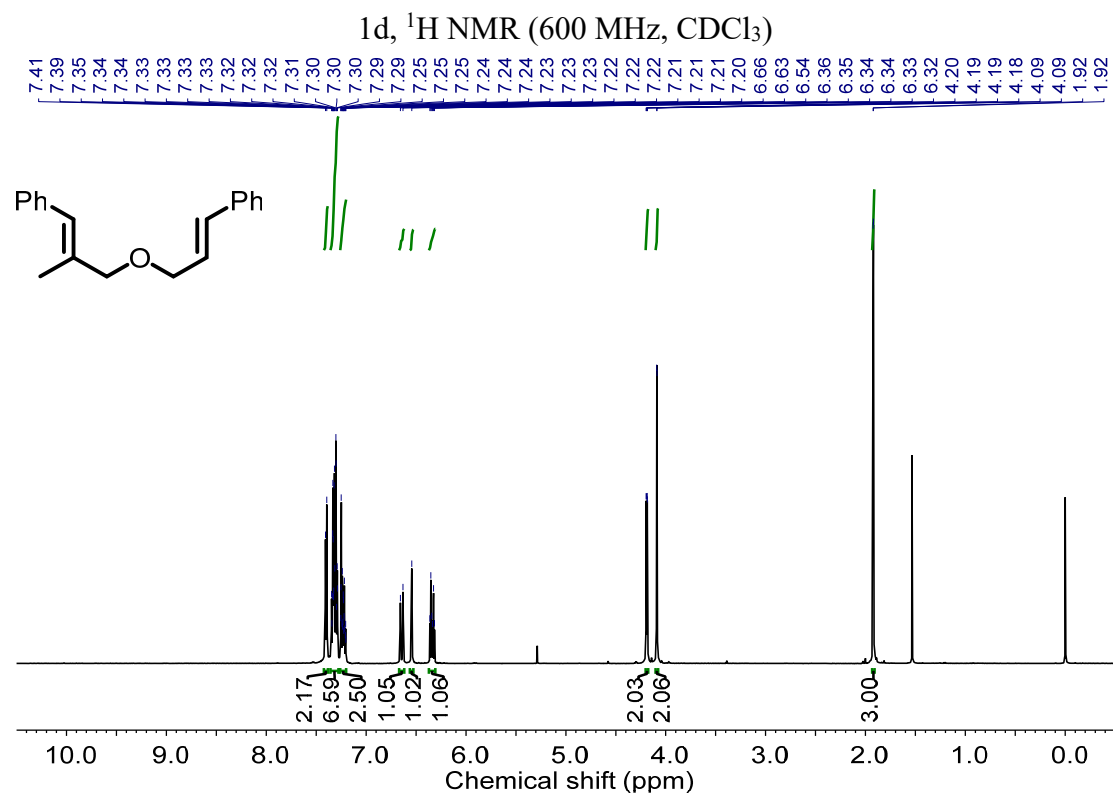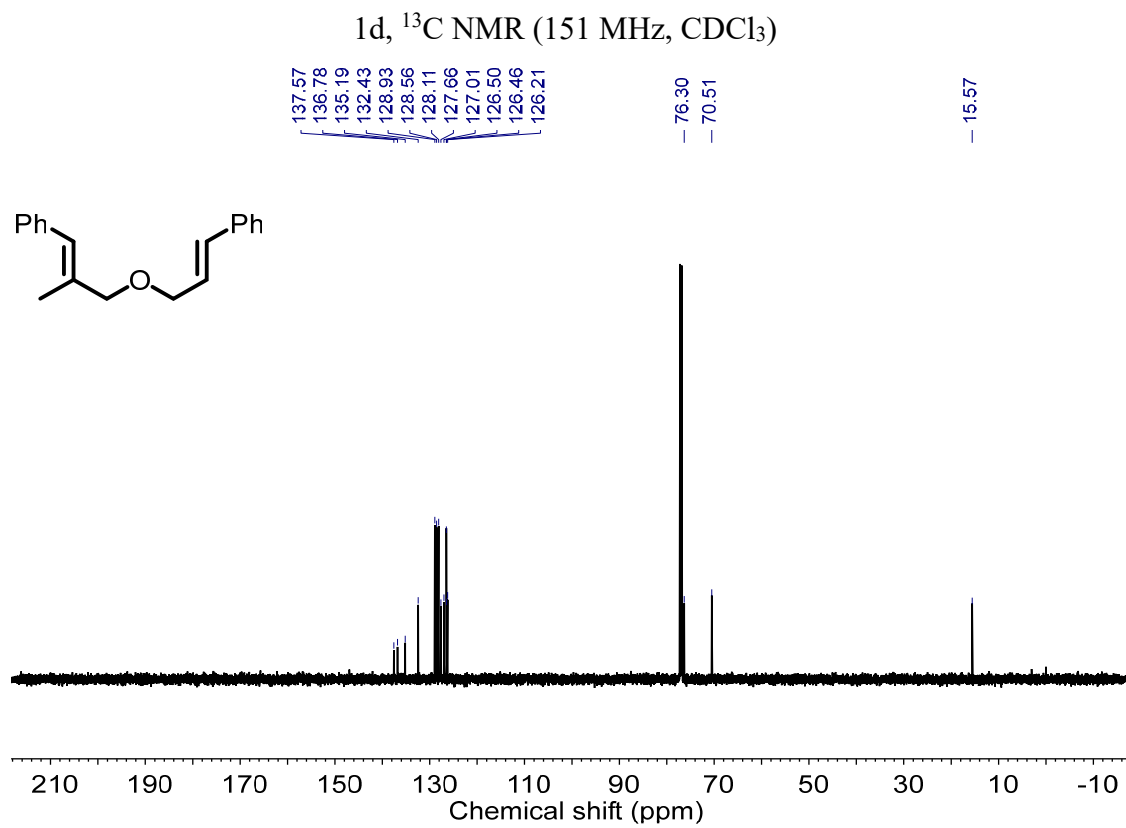

1e, <sup>1</sup>H NMR (600 MHz, CDCl<sub>3</sub>)

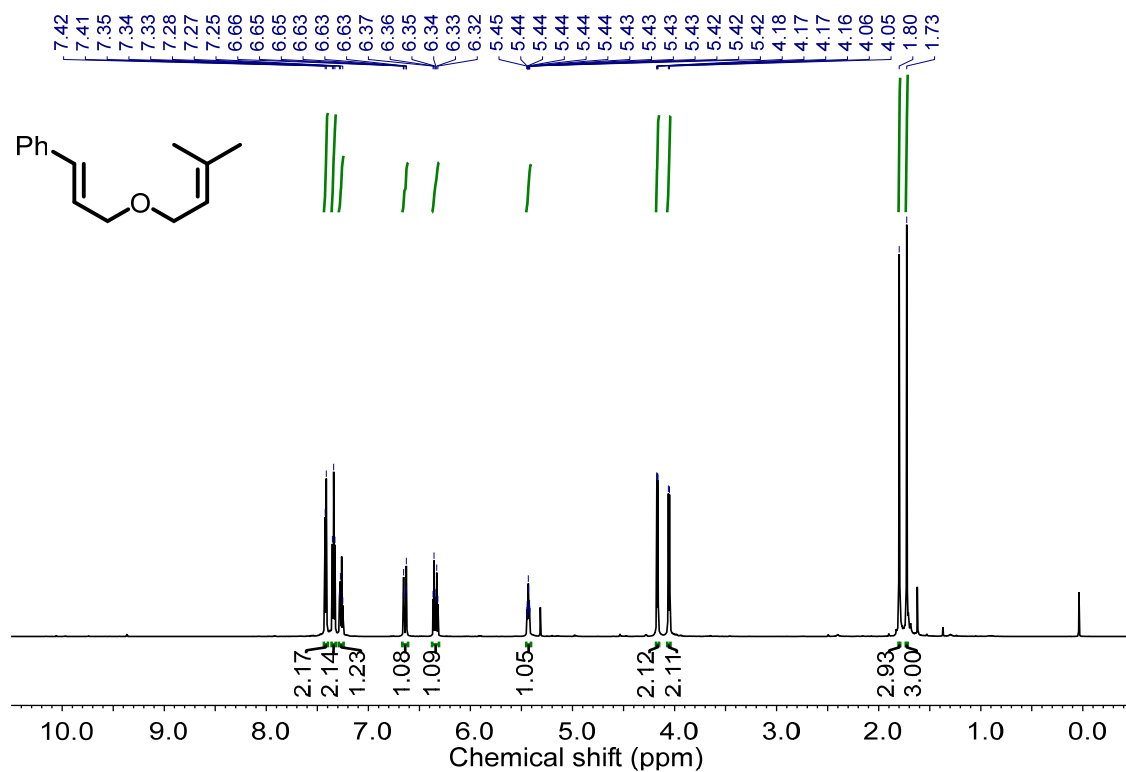

1e, <sup>13</sup>C NMR (151 MHz, CDCl<sub>3</sub>)

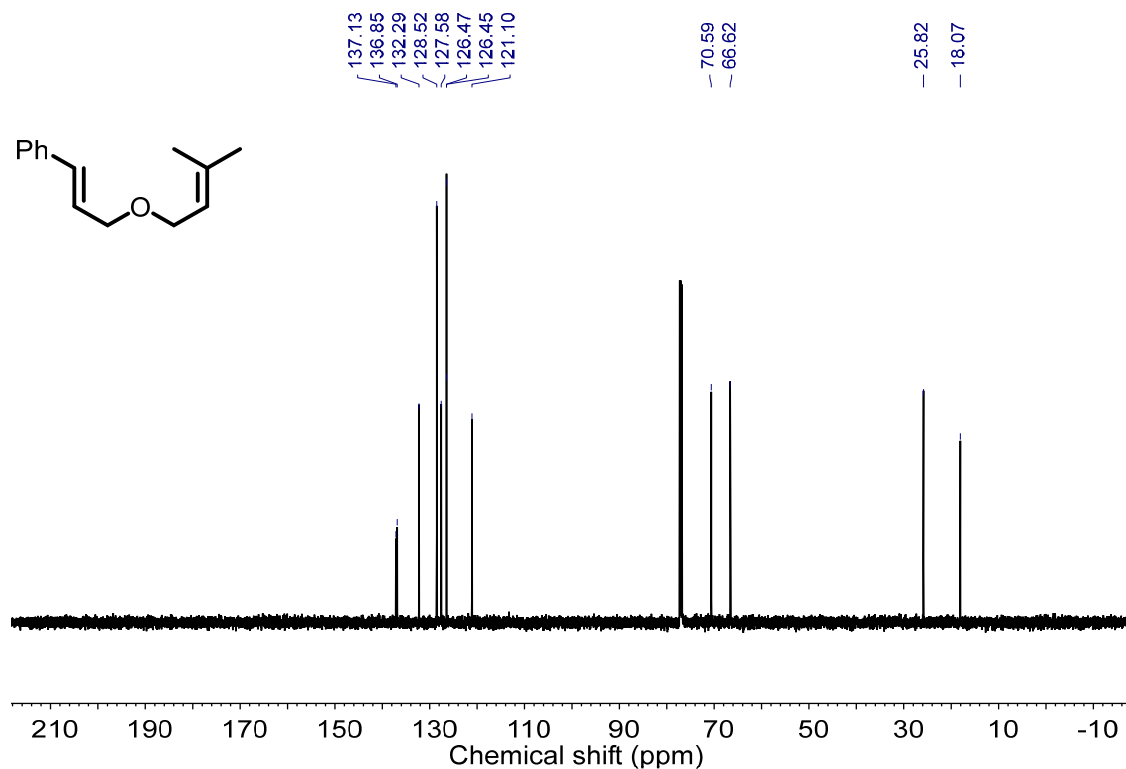

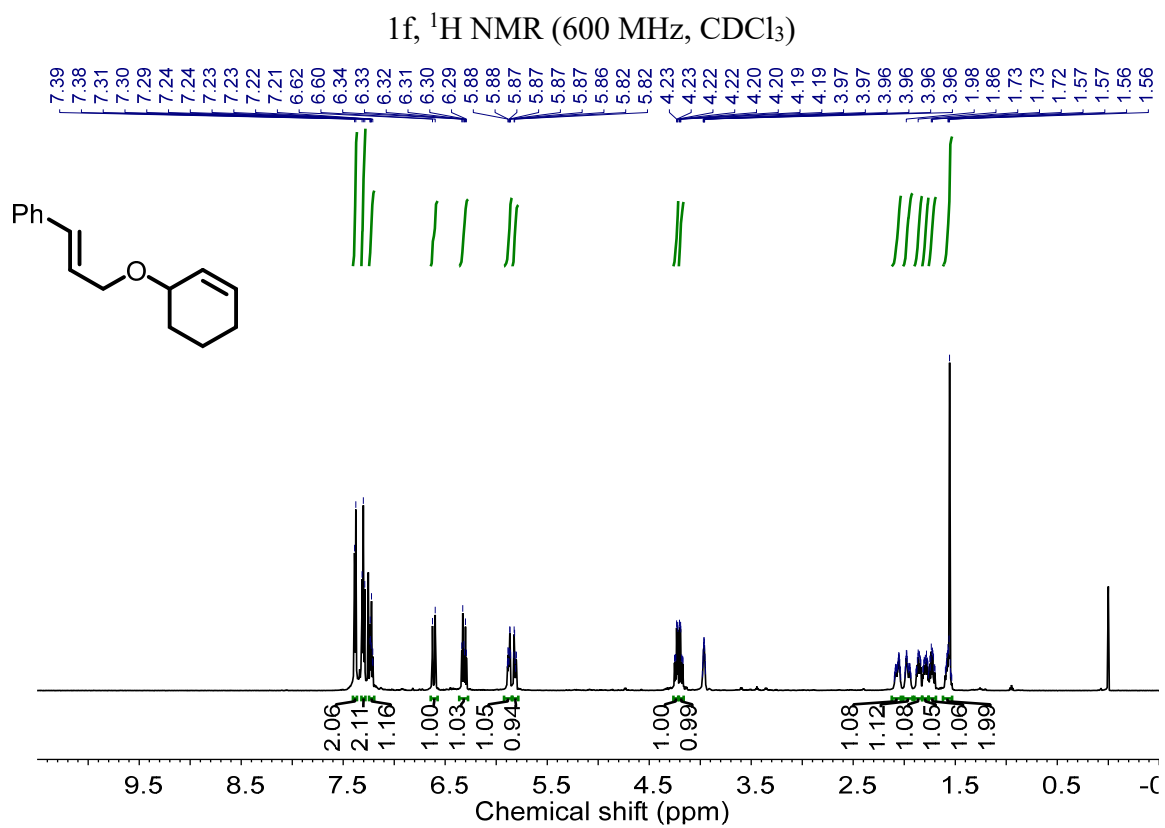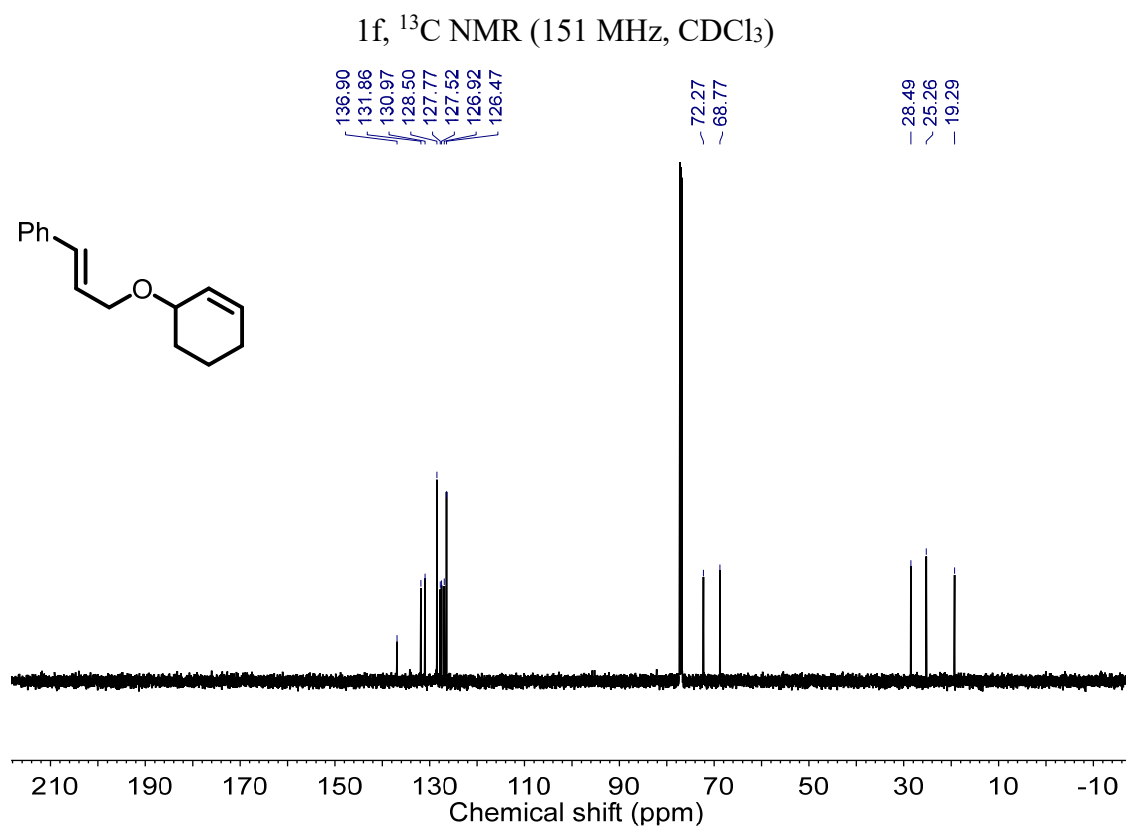

1g, <sup>1</sup>H NMR (600 MHz, Chloroform-*d*)

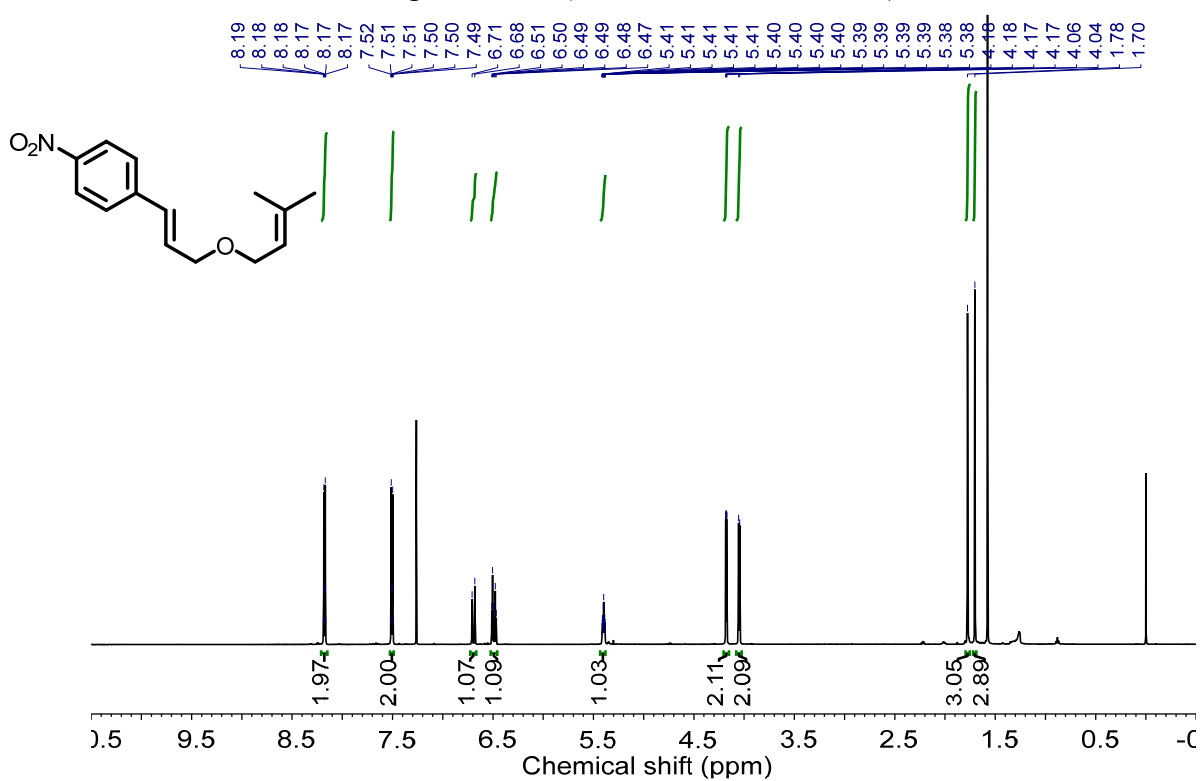

1g, <sup>13</sup>C NMR (151 MHz, Chloroform-*d*)

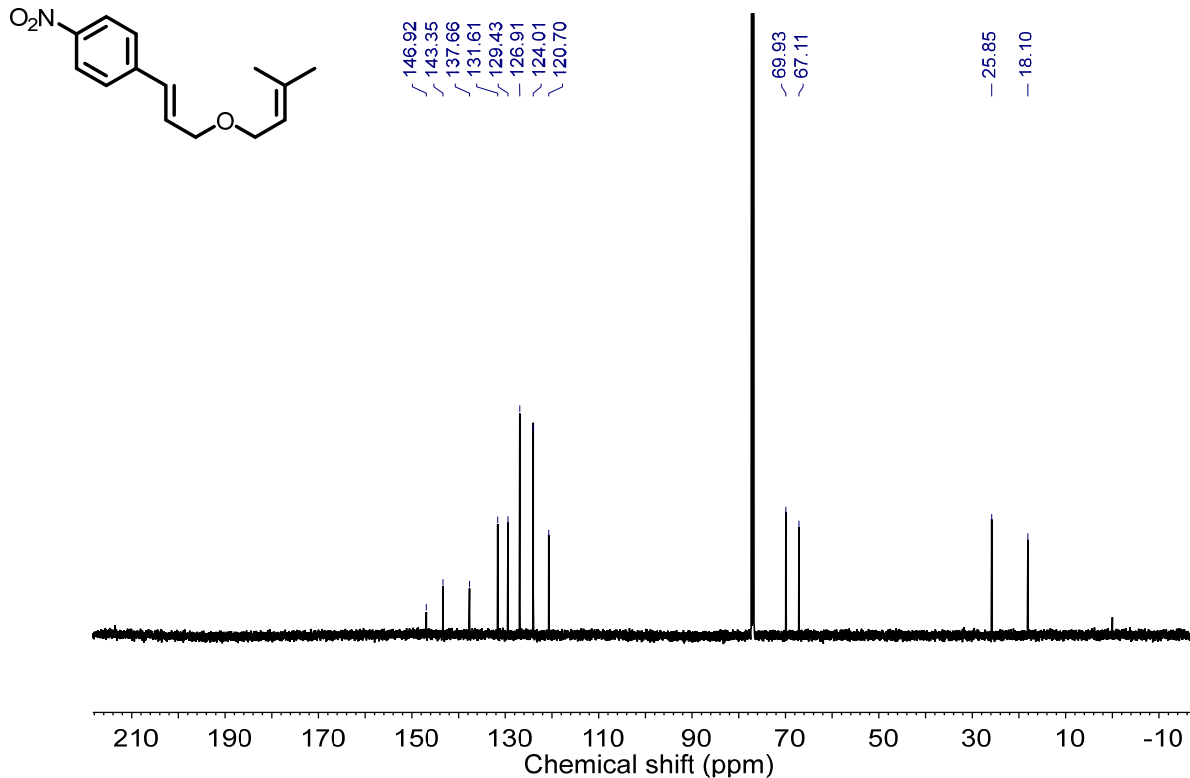

(E)-1h, <sup>1</sup>H NMR (600 MHz, Chloroform-*d*)

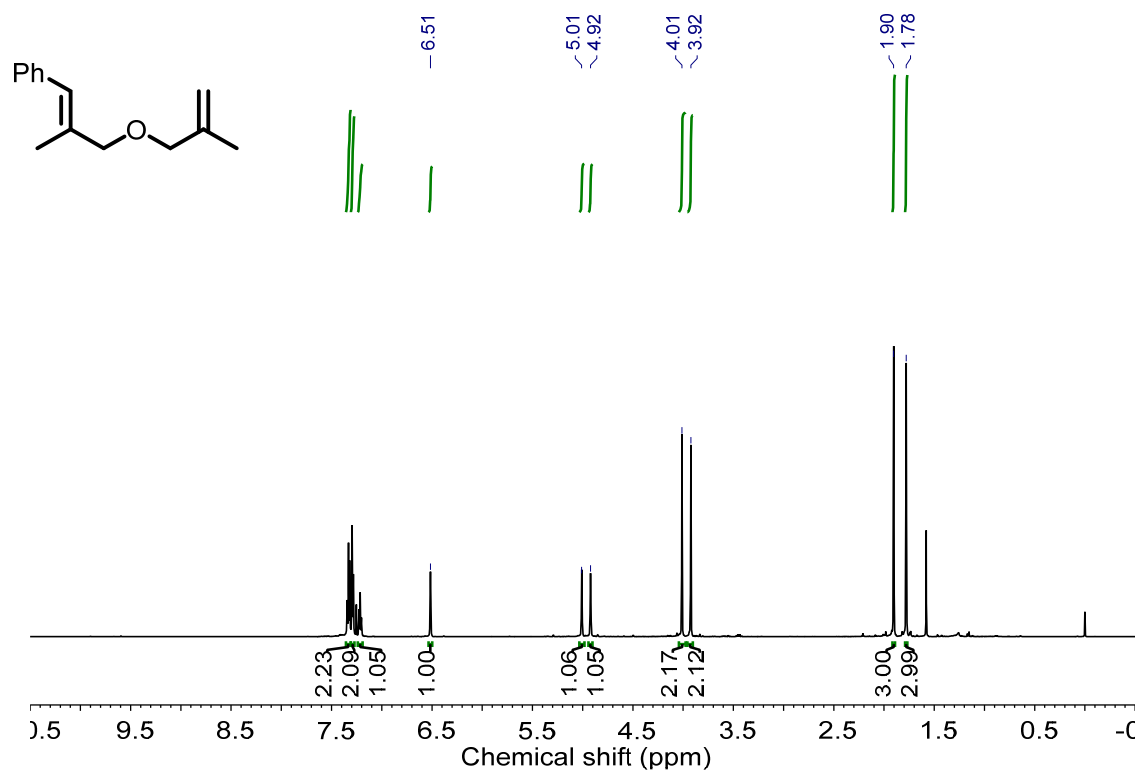

(E)-1h, <sup>13</sup>C NMR (151 MHz, Chloroform-*d*)

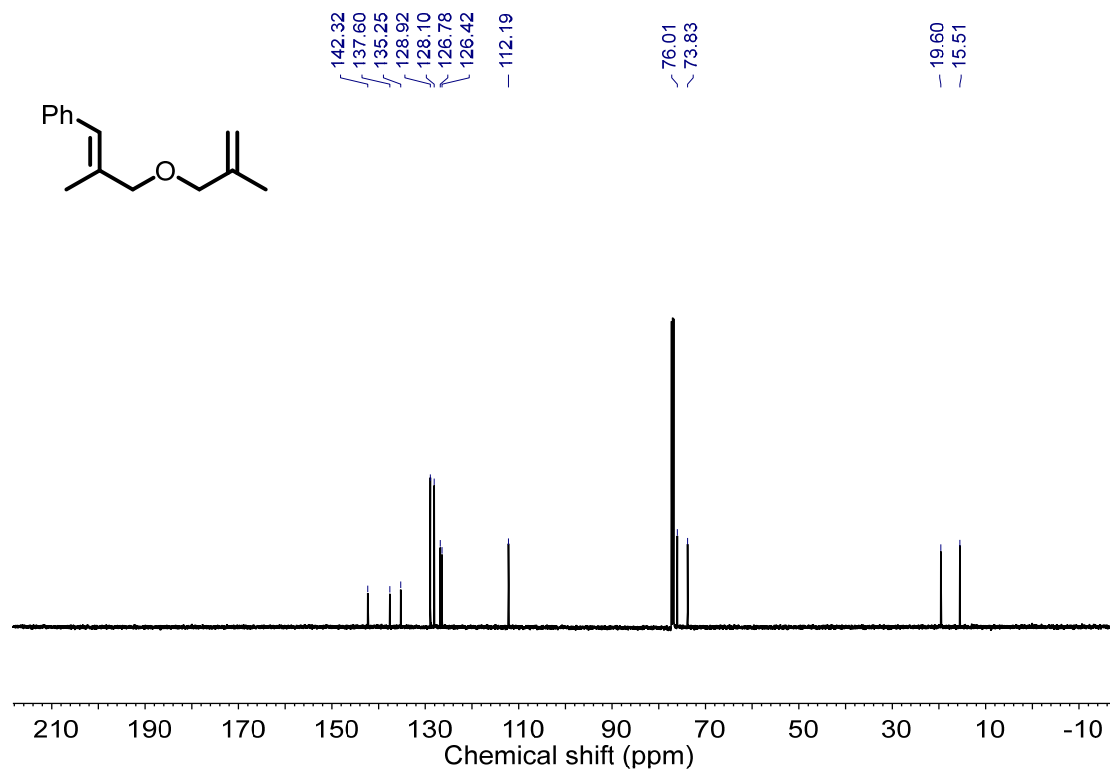

3a, <sup>1</sup>H NMR (600 MHz, CDCl<sub>3</sub>)

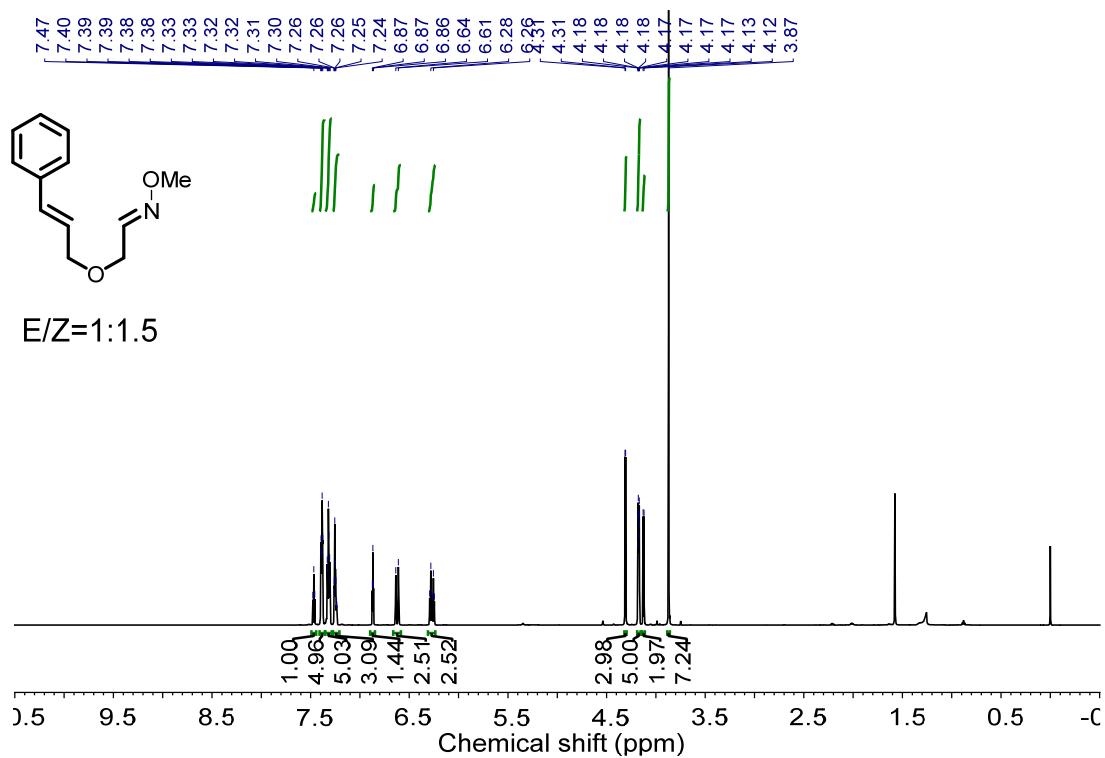

3a, <sup>13</sup>C NMR (151 MHz, CDCl<sub>3</sub>)

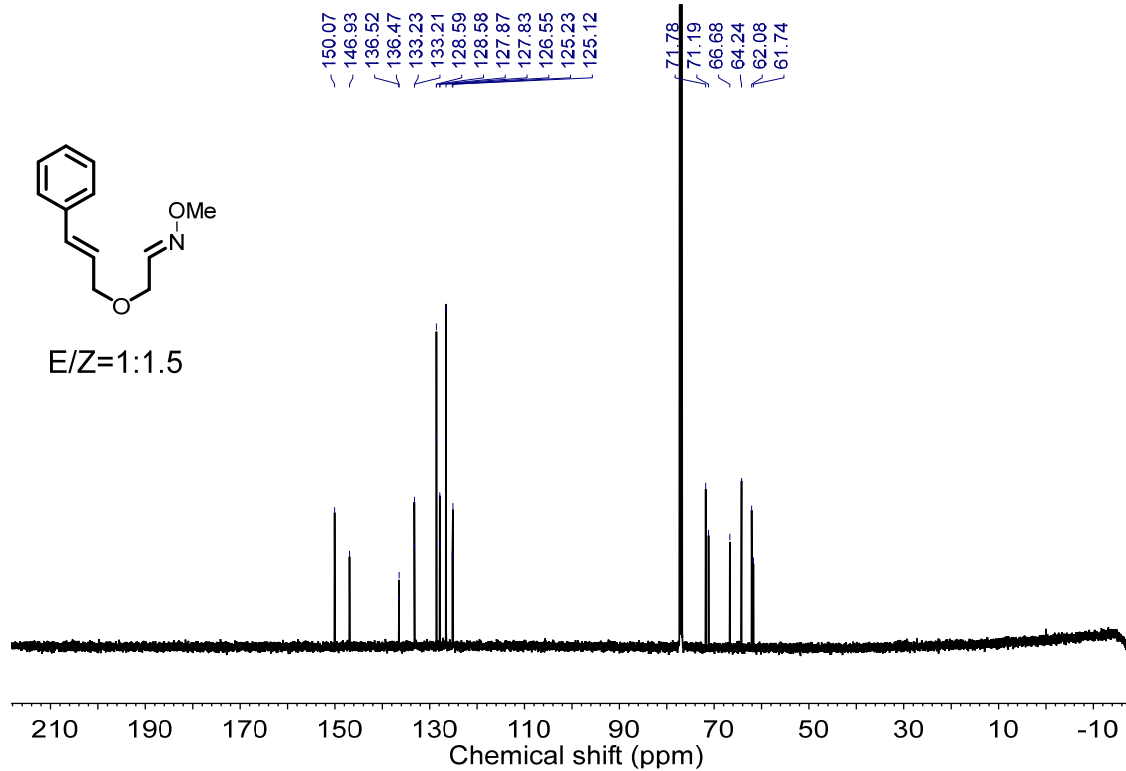

3b, <sup>1</sup>H NMR (400 MHz, CDCl<sub>3</sub>)

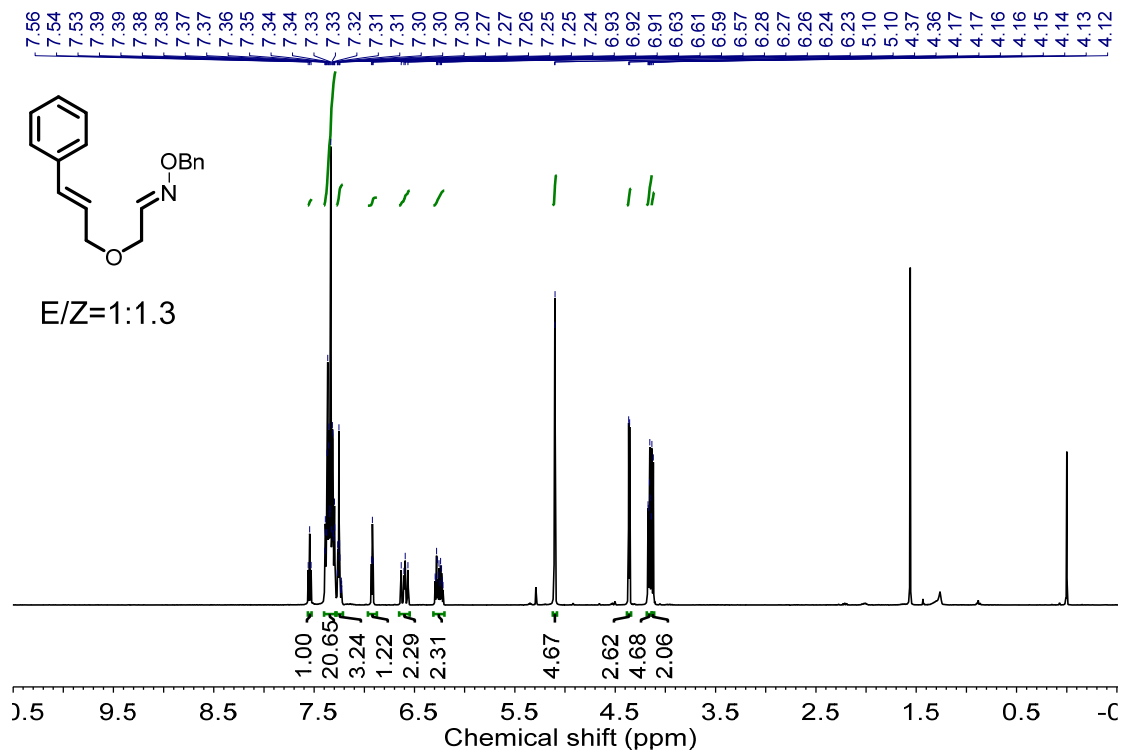

3b, <sup>13</sup>C NMR (101 MHz, CDCl<sub>3</sub>)

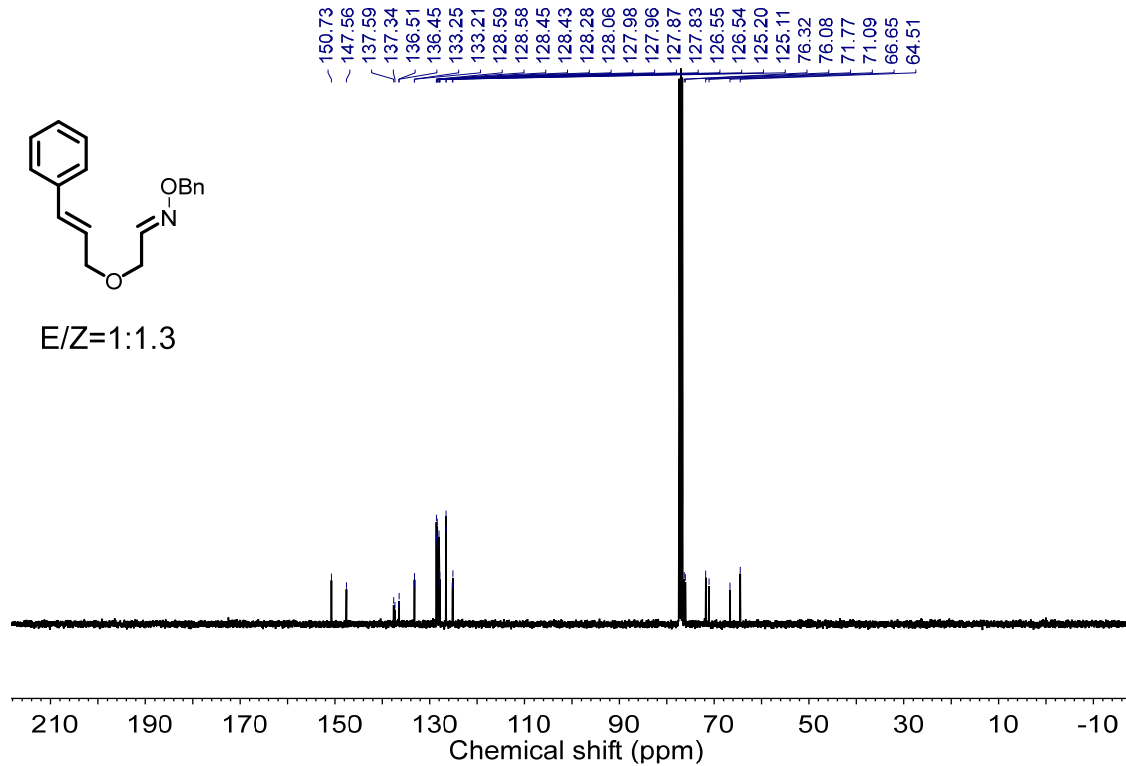

3c,  $^1\text{H}$  NMR (600 MHz,  $\text{CDCl}_3$ )

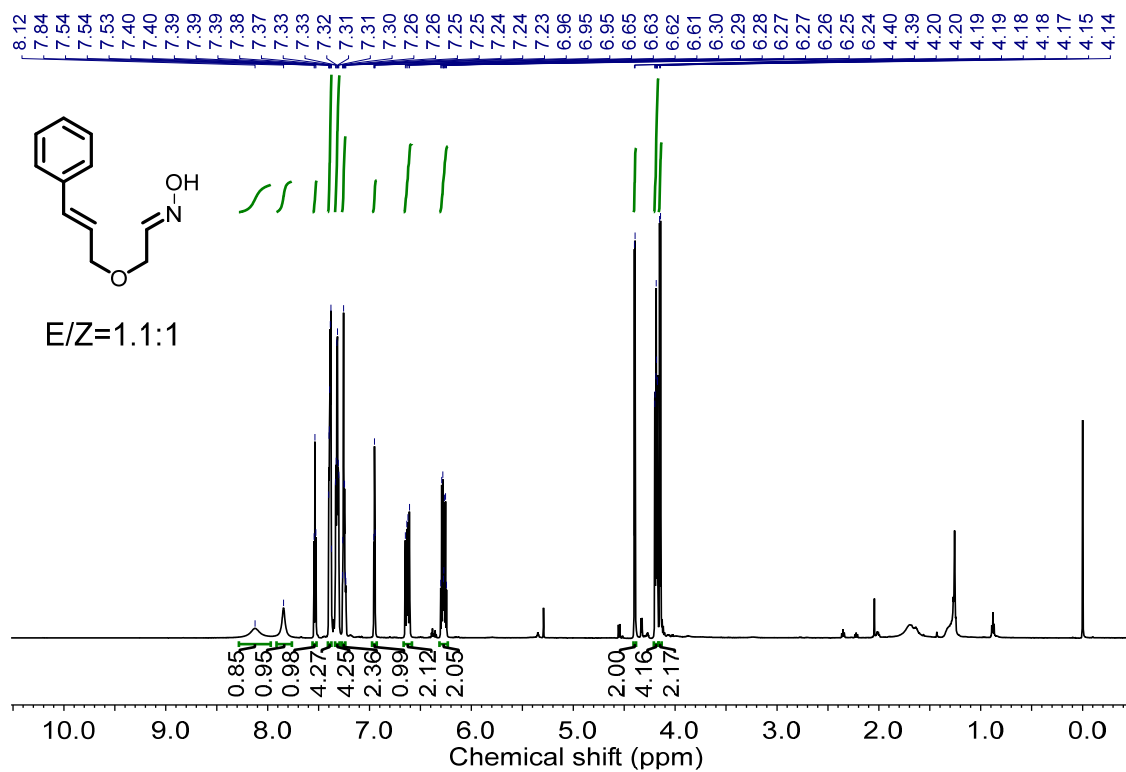

3c,  $^{13}\text{C}$  NMR (151 MHz,  $\text{CDCl}_3$ )

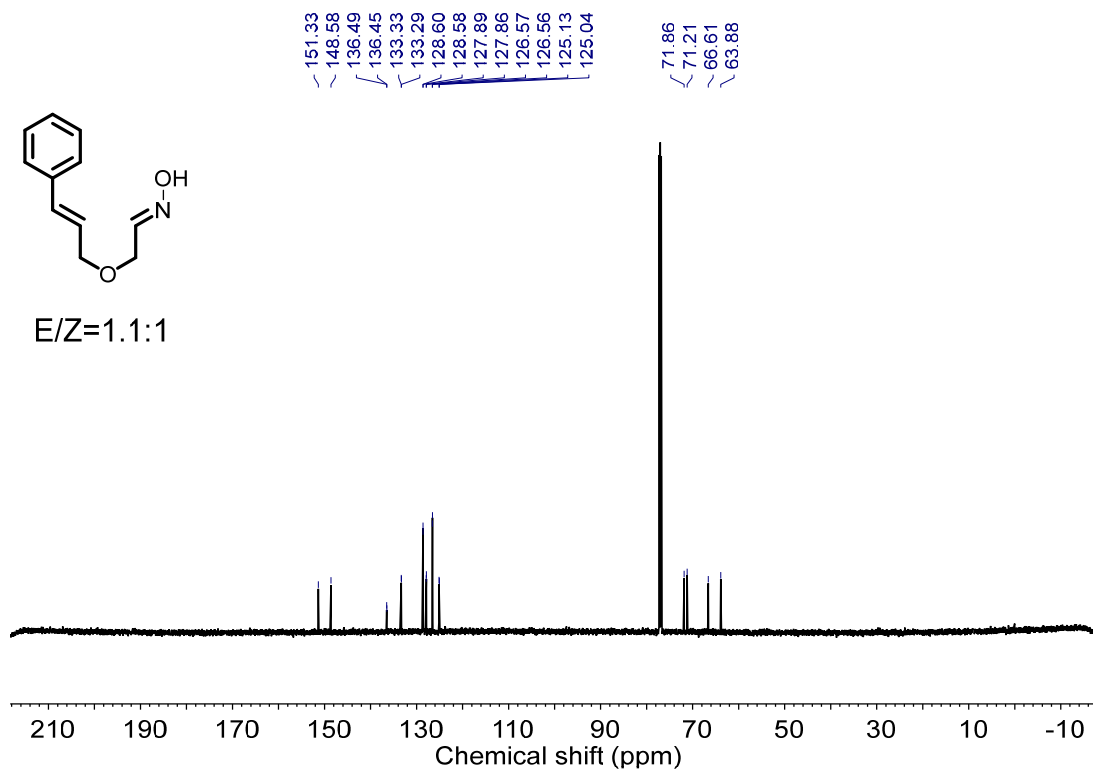



3d, <sup>1</sup>H NMR (600 MHz, CDCl<sub>3</sub>)

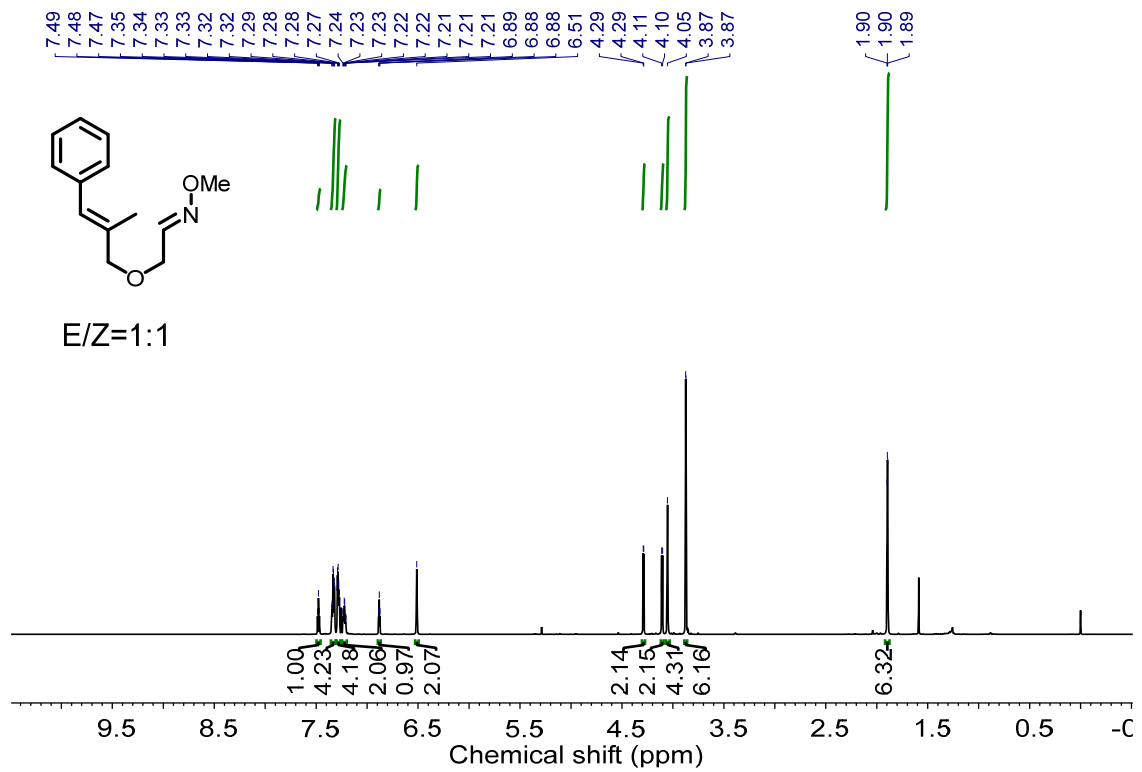

3d, <sup>13</sup>C NMR (151 MHz, CDCl<sub>3</sub>)

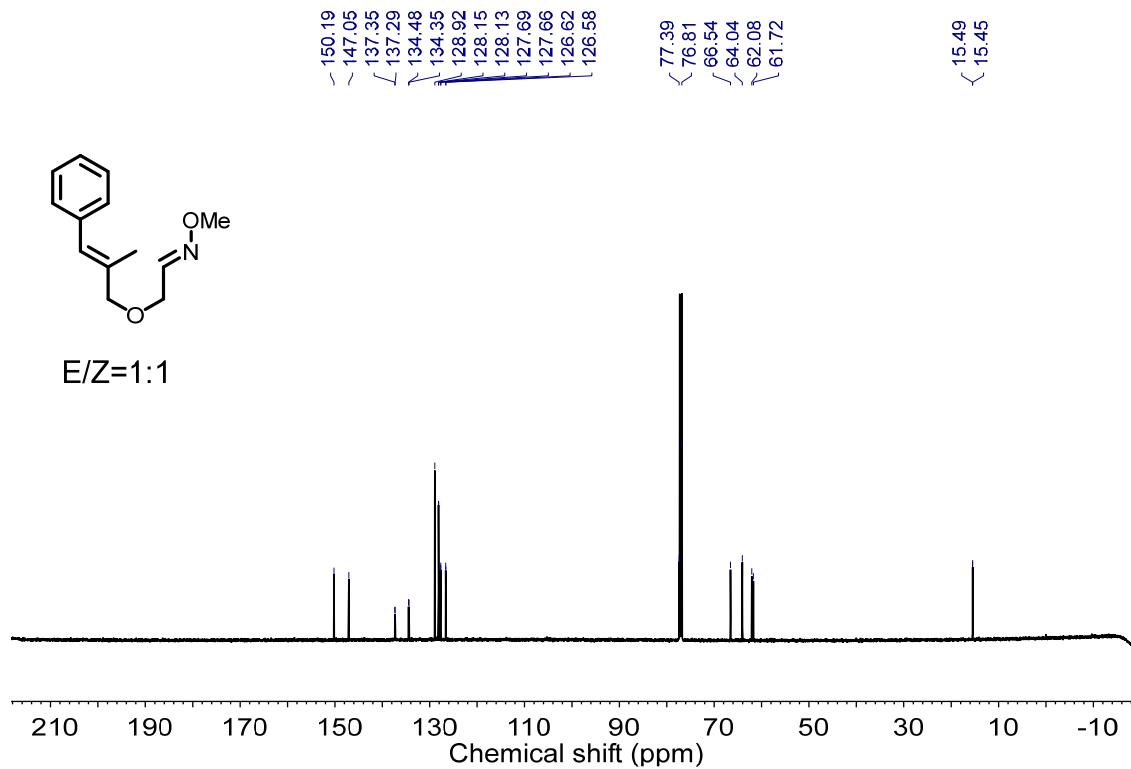

3e, <sup>1</sup>H NMR (600 MHz, CDCl<sub>3</sub>)

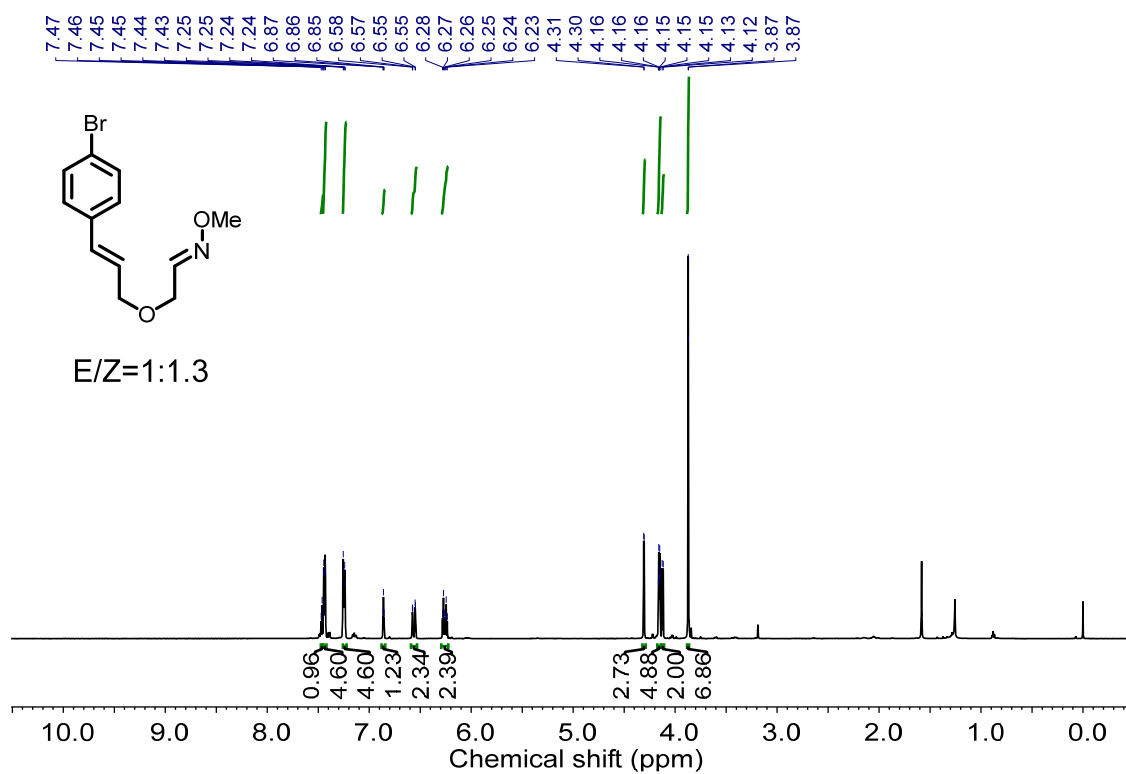

3e, <sup>13</sup>C NMR (151 MHz, CDCl<sub>3</sub>)

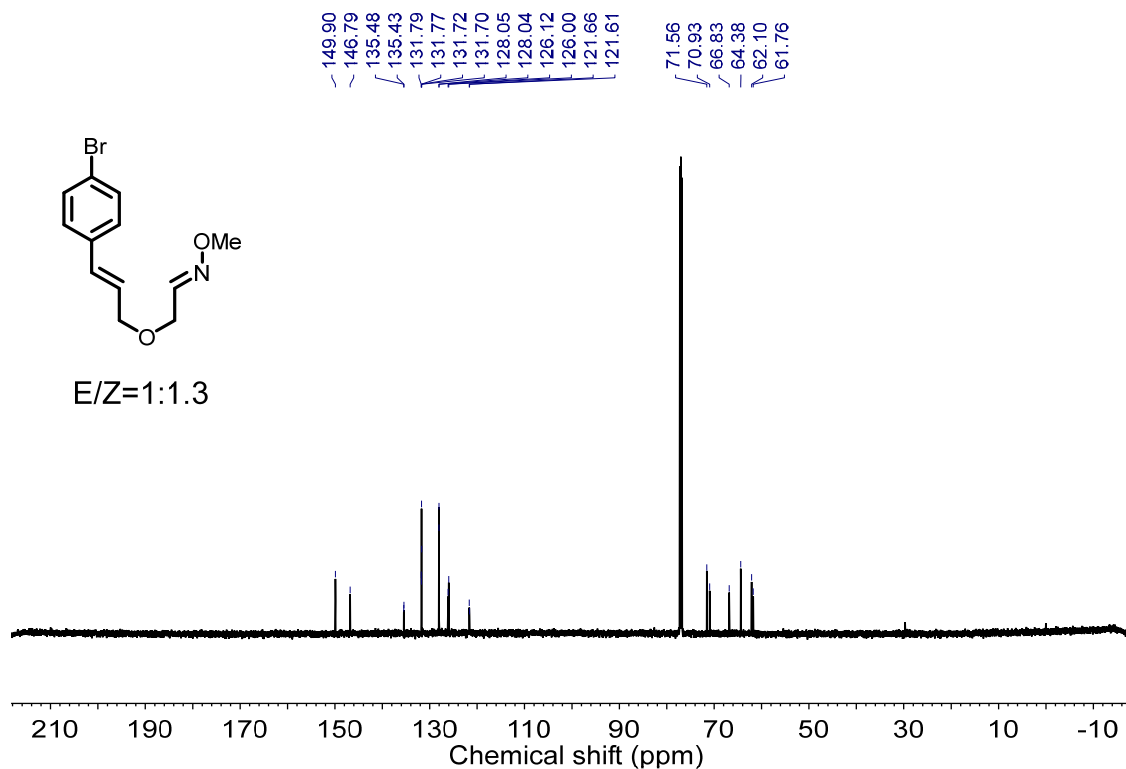

3f, <sup>1</sup>H NMR (600 MHz, CDCl<sub>3</sub>)

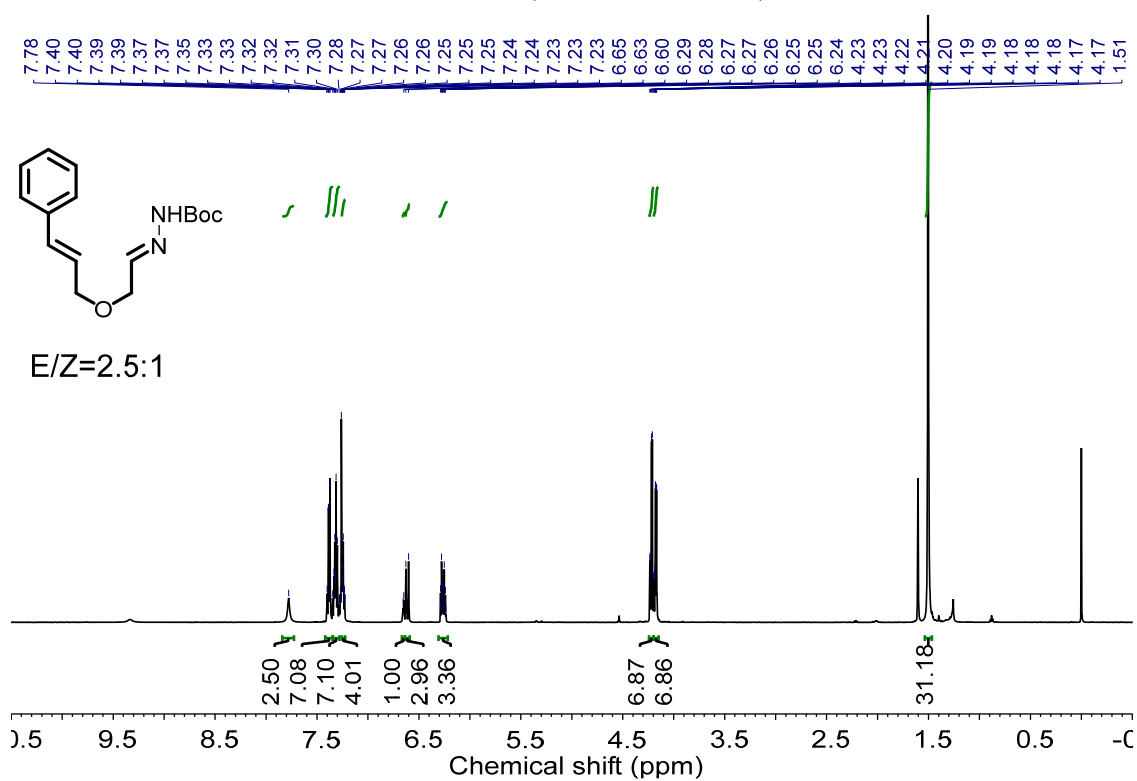

3f, <sup>13</sup>C NMR (151 MHz, CDCl<sub>3</sub>)

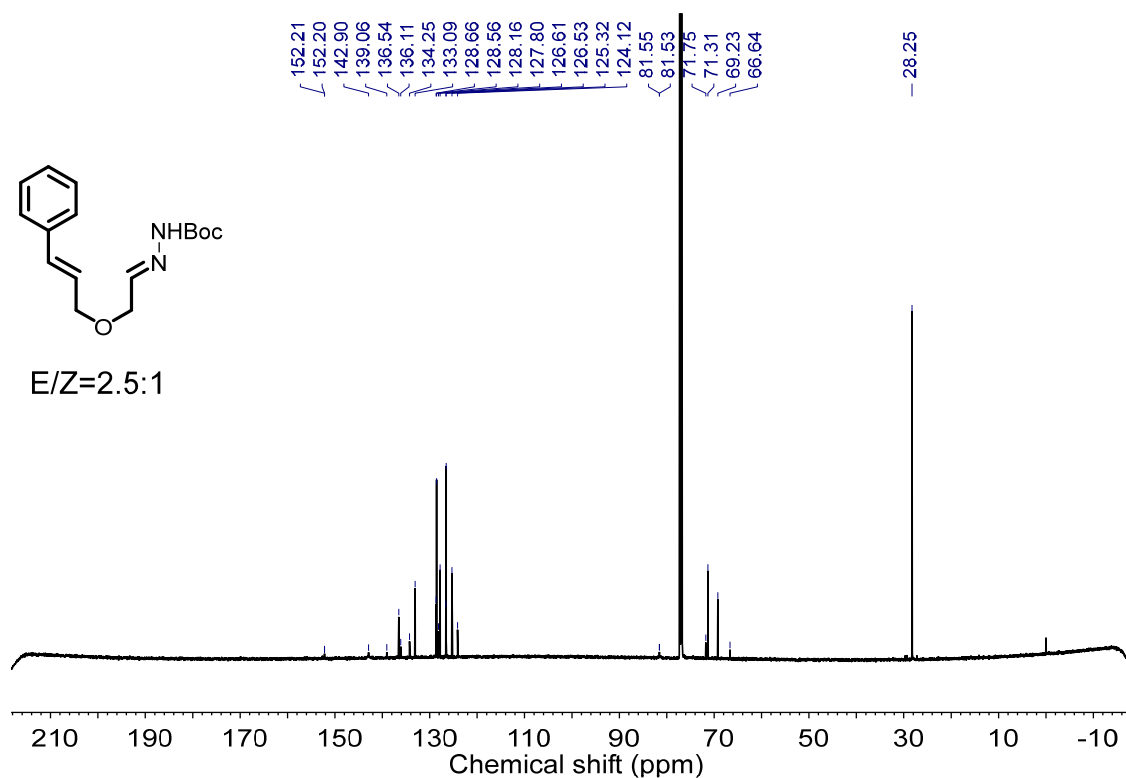

9a,  $^1\text{H}$  NMR (400 MHz,  $\text{CDCl}_3$ )

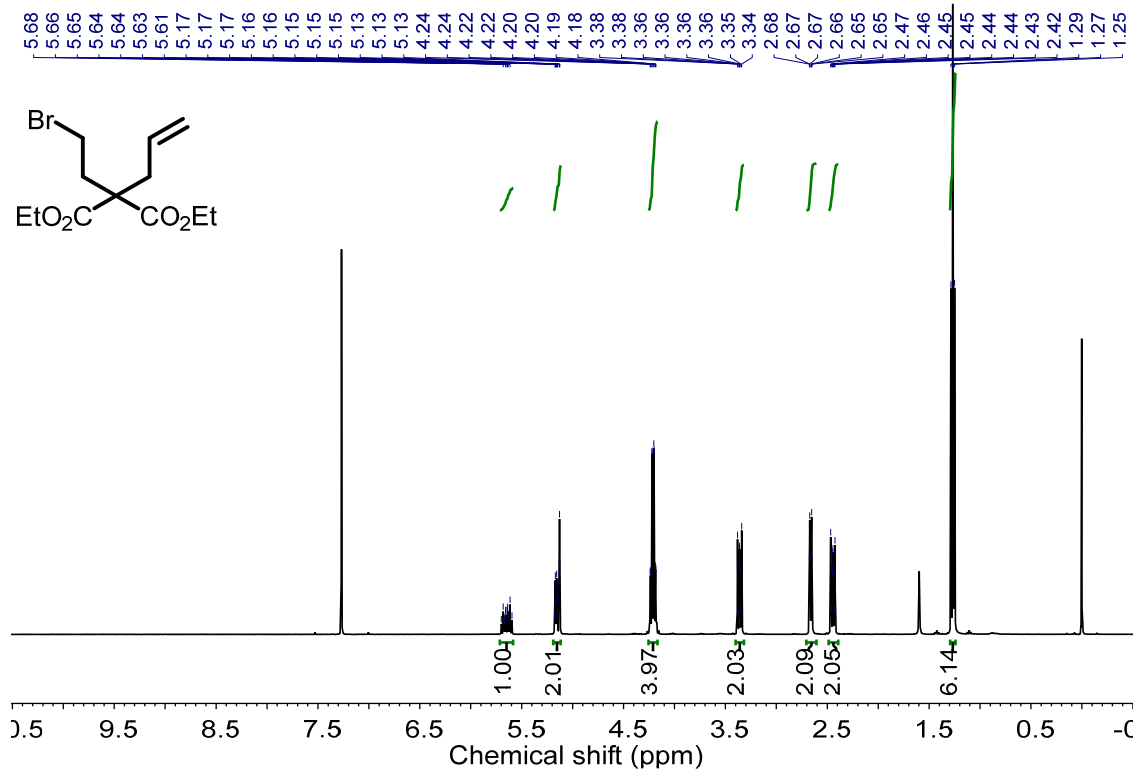

9a,  $^{13}\text{C}$  NMR (101 MHz,  $\text{CDCl}_3$ )

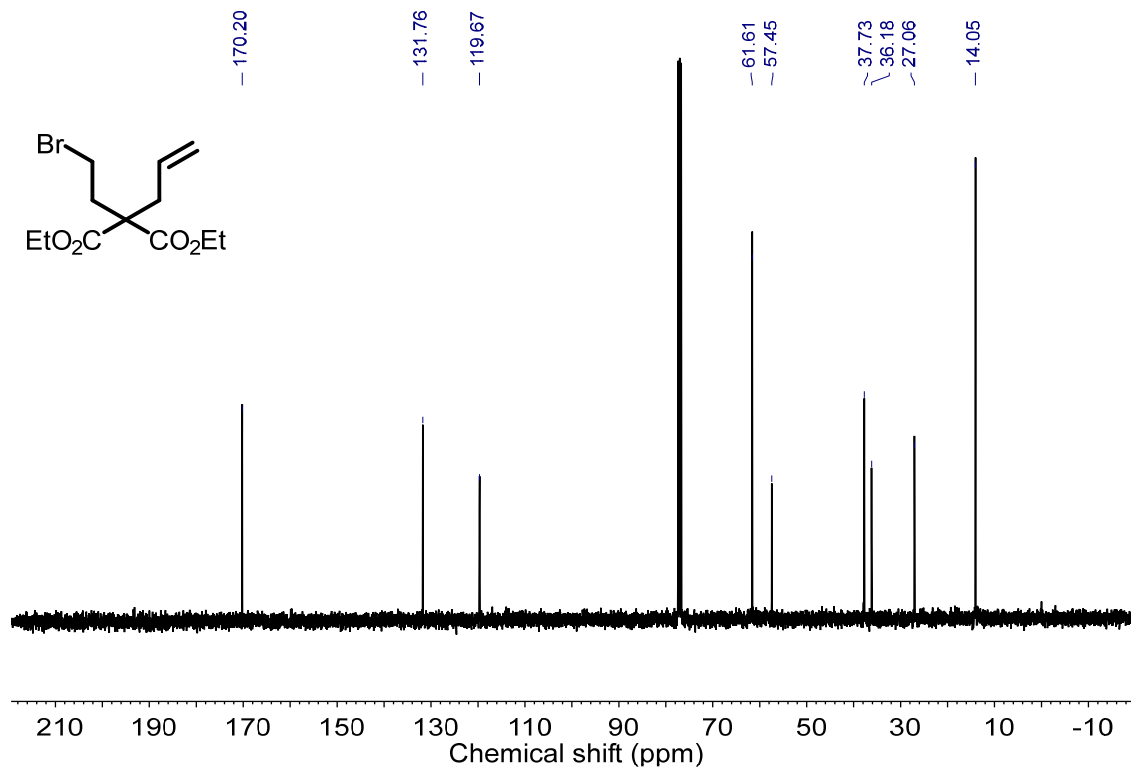

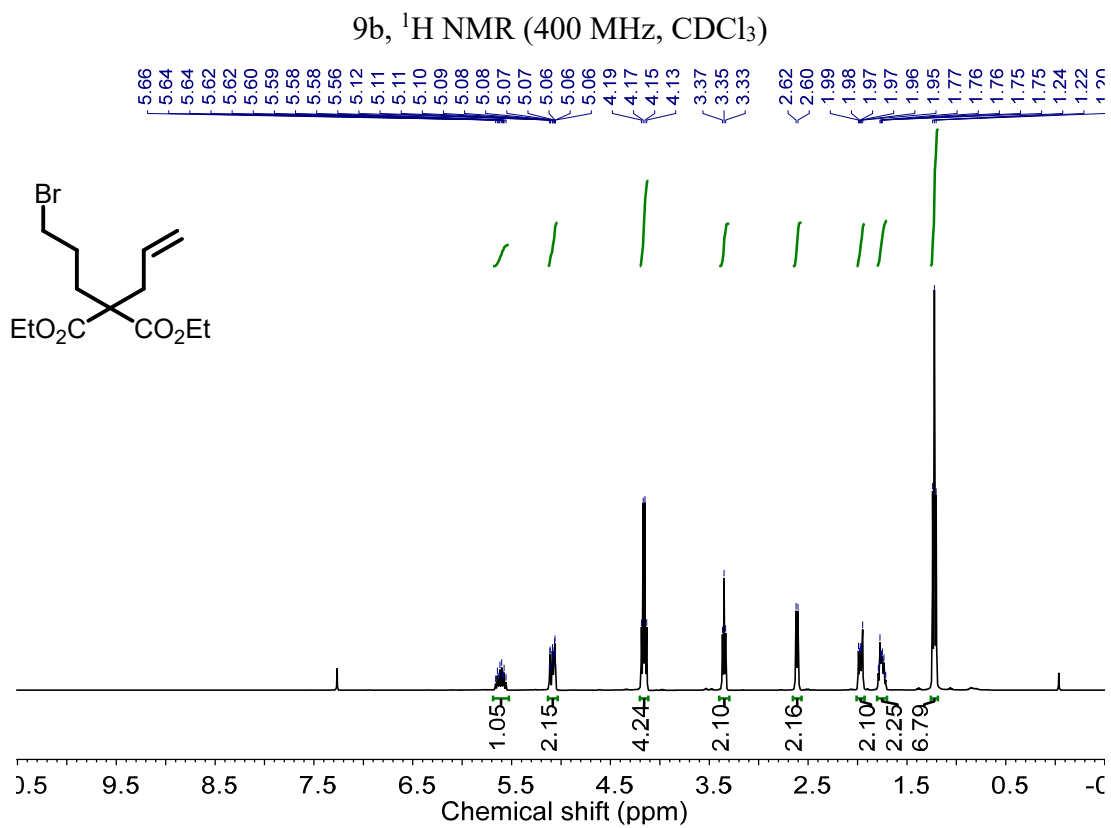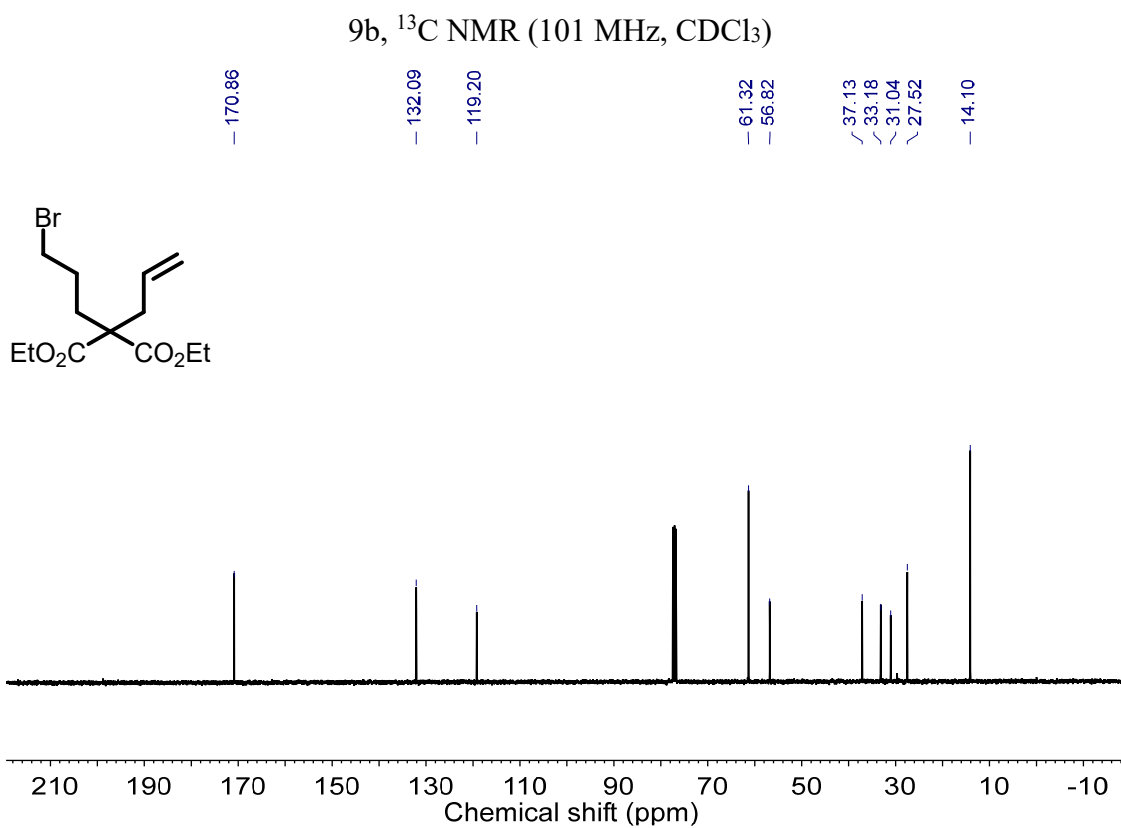

9c,  $^1\text{H}$  NMR (400 MHz,  $\text{CDCl}_3$ )

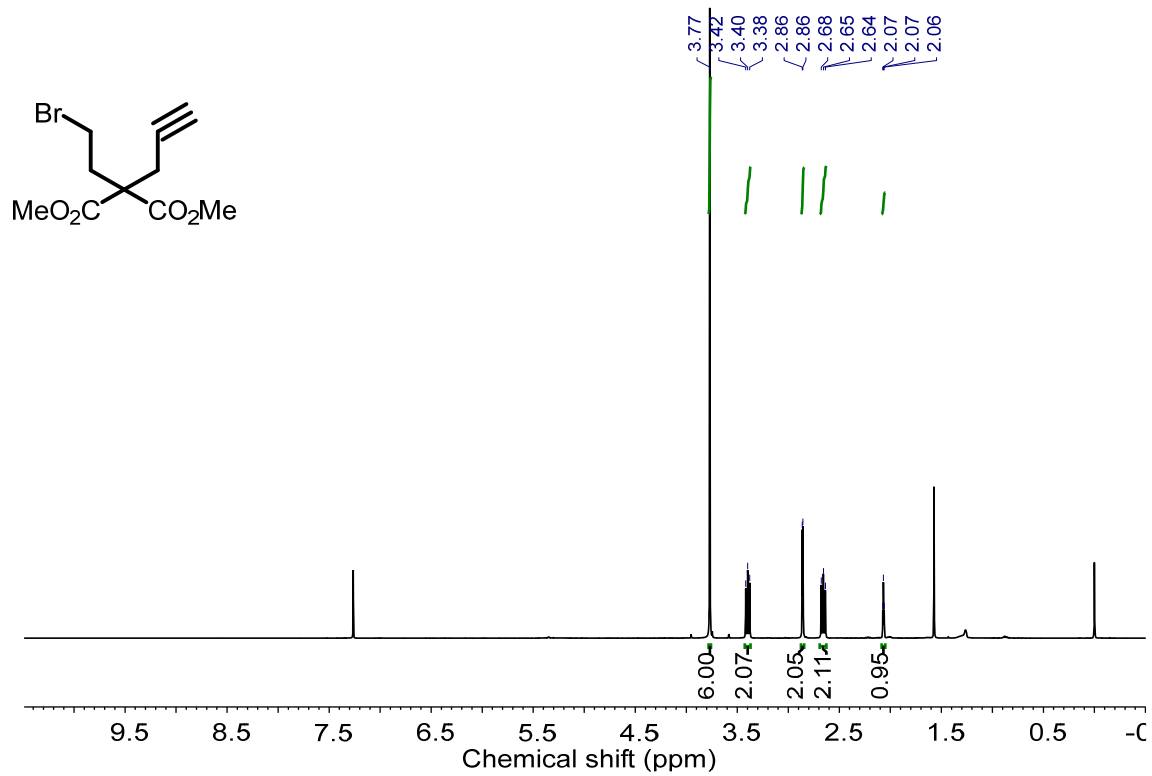

9c,  $^{13}\text{C}$  NMR (101 MHz,  $\text{CDCl}_3$ )

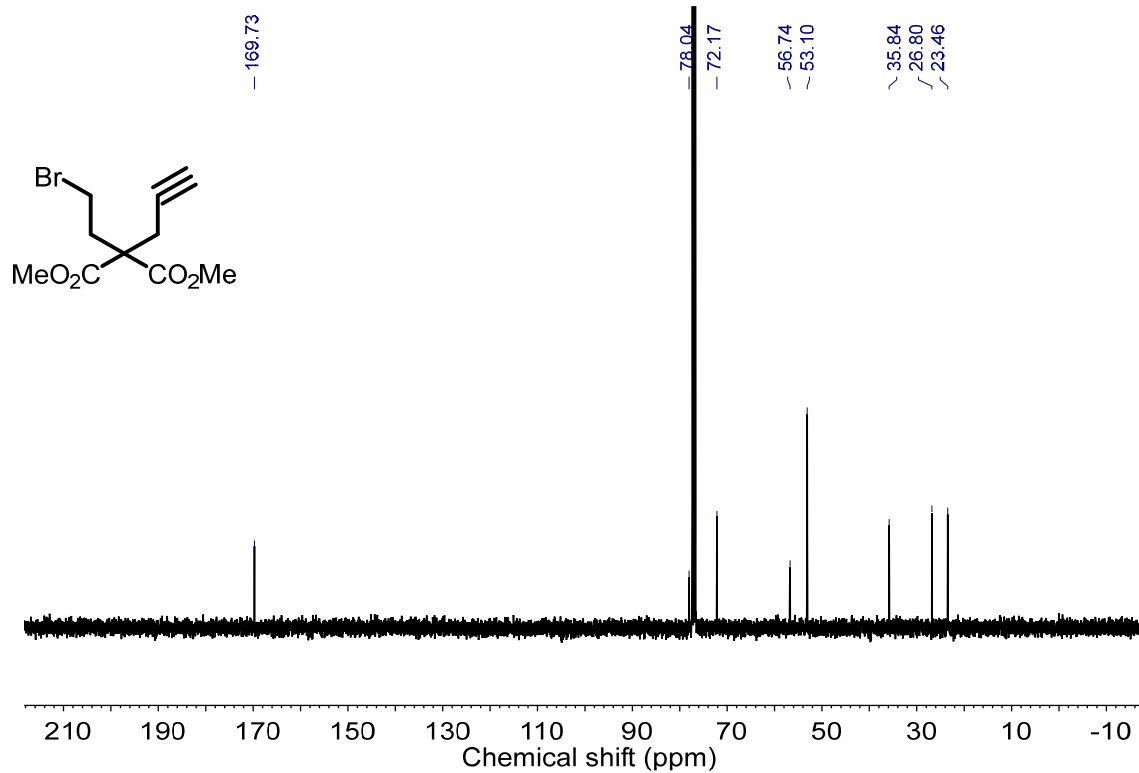

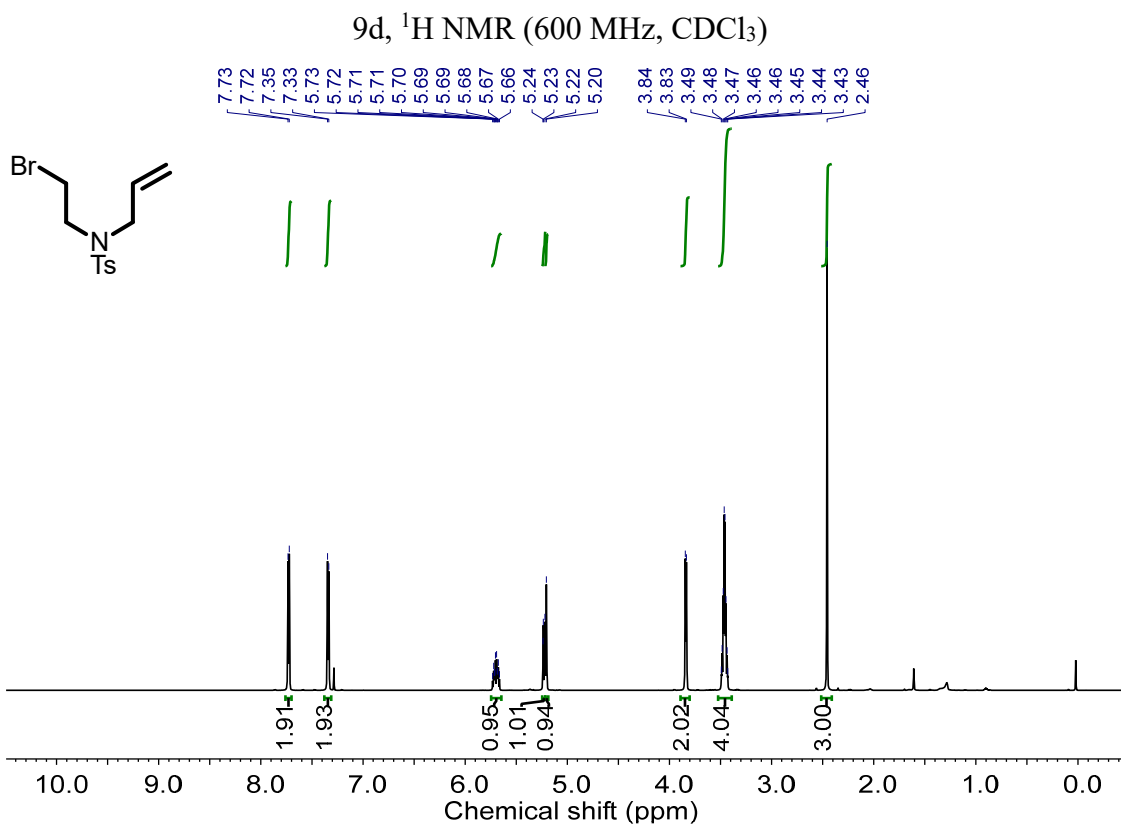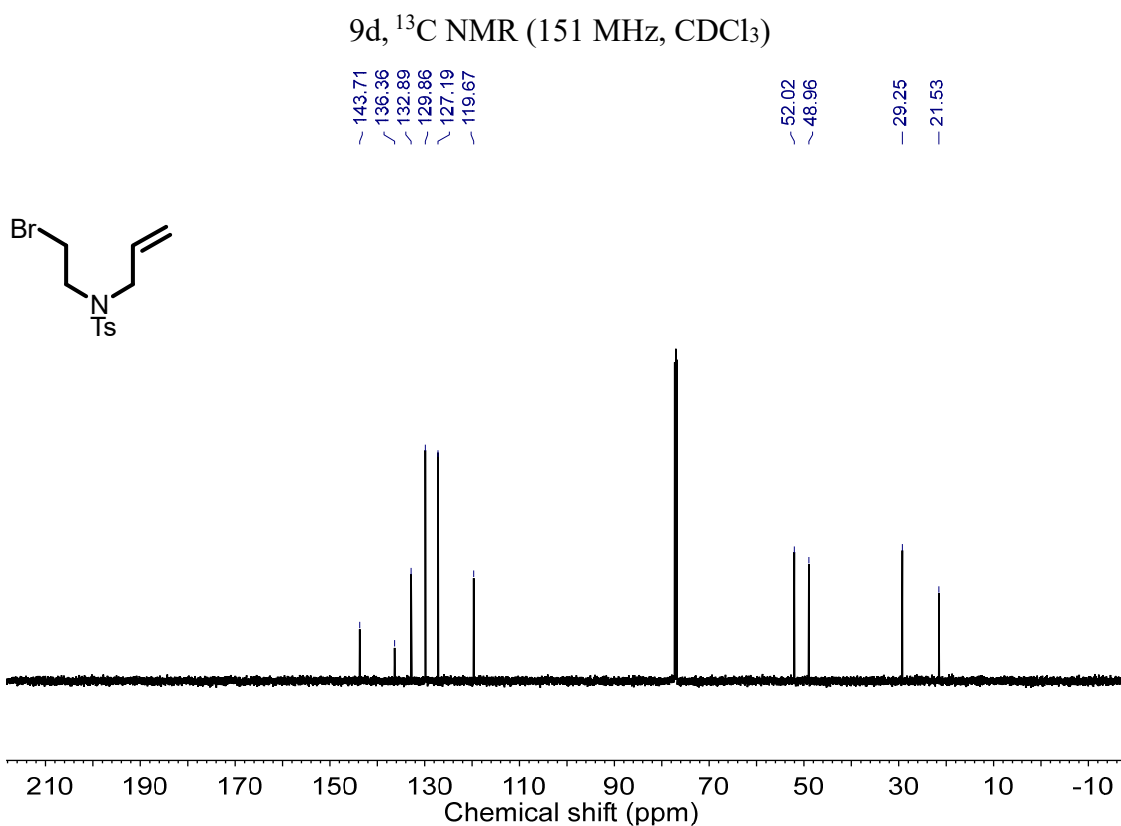

9e, <sup>1</sup>H NMR (400 MHz, CDCl<sub>3</sub>)

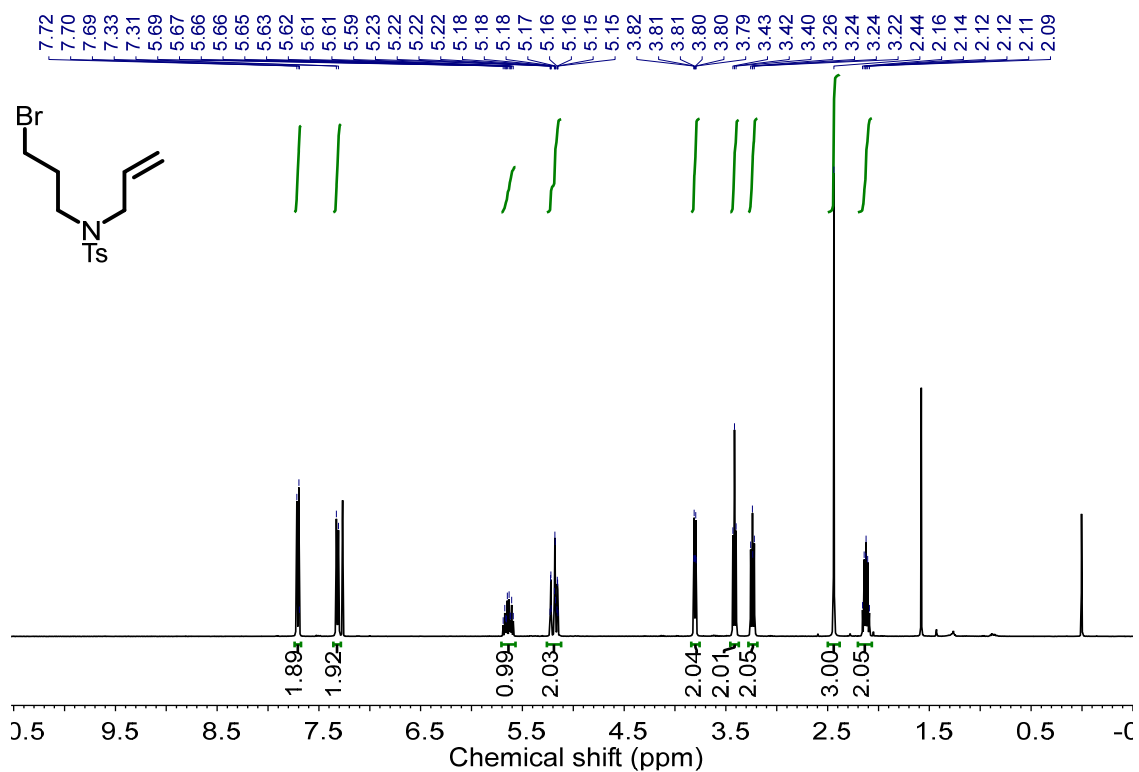

9e, <sup>13</sup>C NMR (126 MHz, CDCl<sub>3</sub>)

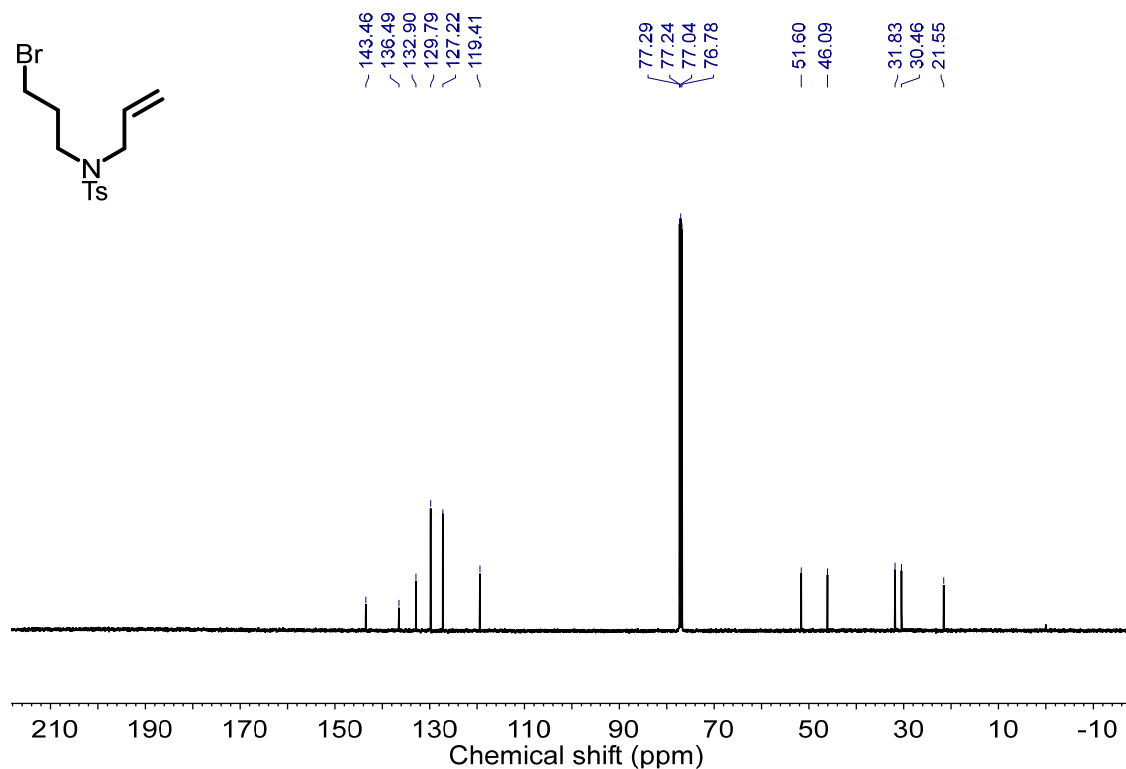



9f, <sup>1</sup>H NMR (400 MHz, CDCl<sub>3</sub>)

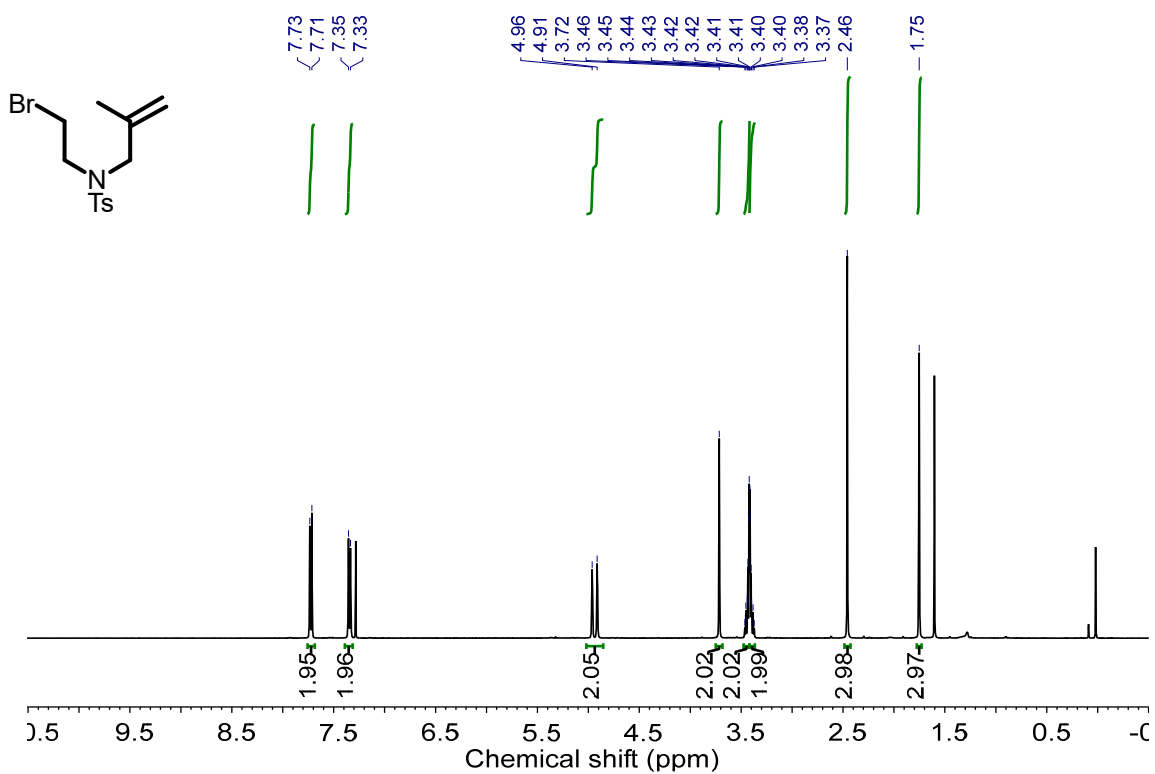

9f, <sup>13</sup>C NMR (101 MHz, CDCl<sub>3</sub>)

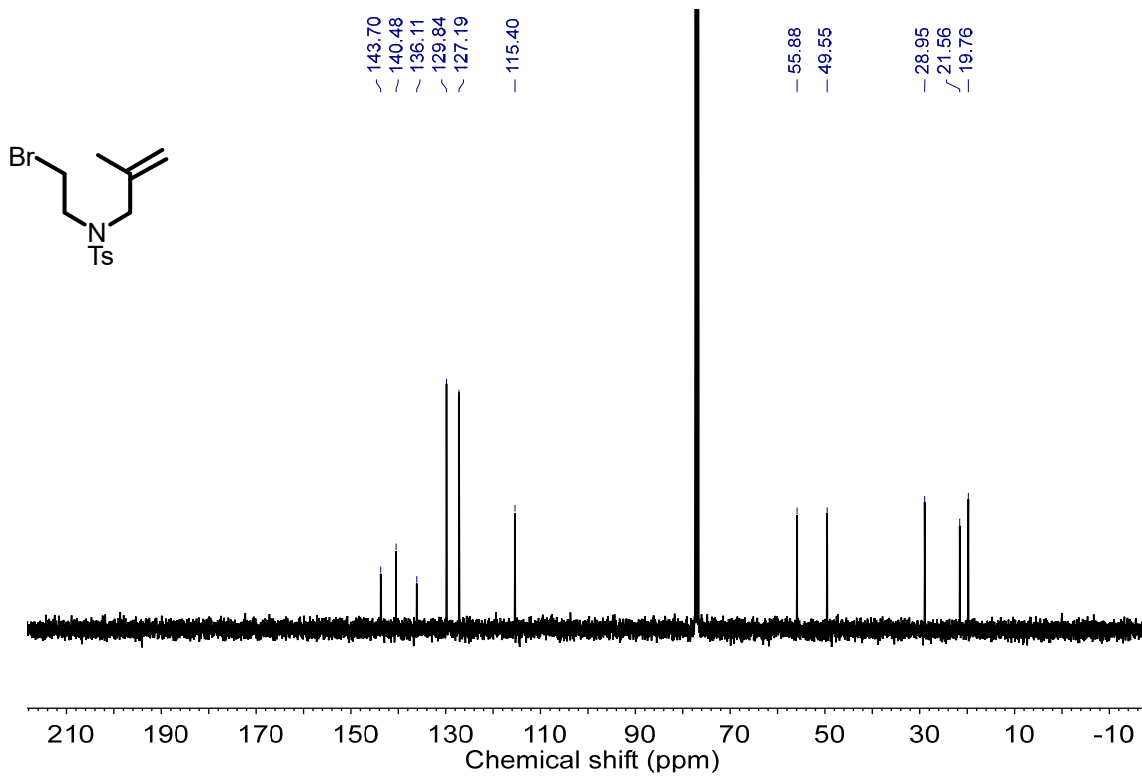

2a, <sup>1</sup>H NMR (600 MHz, CDCl<sub>3</sub>)

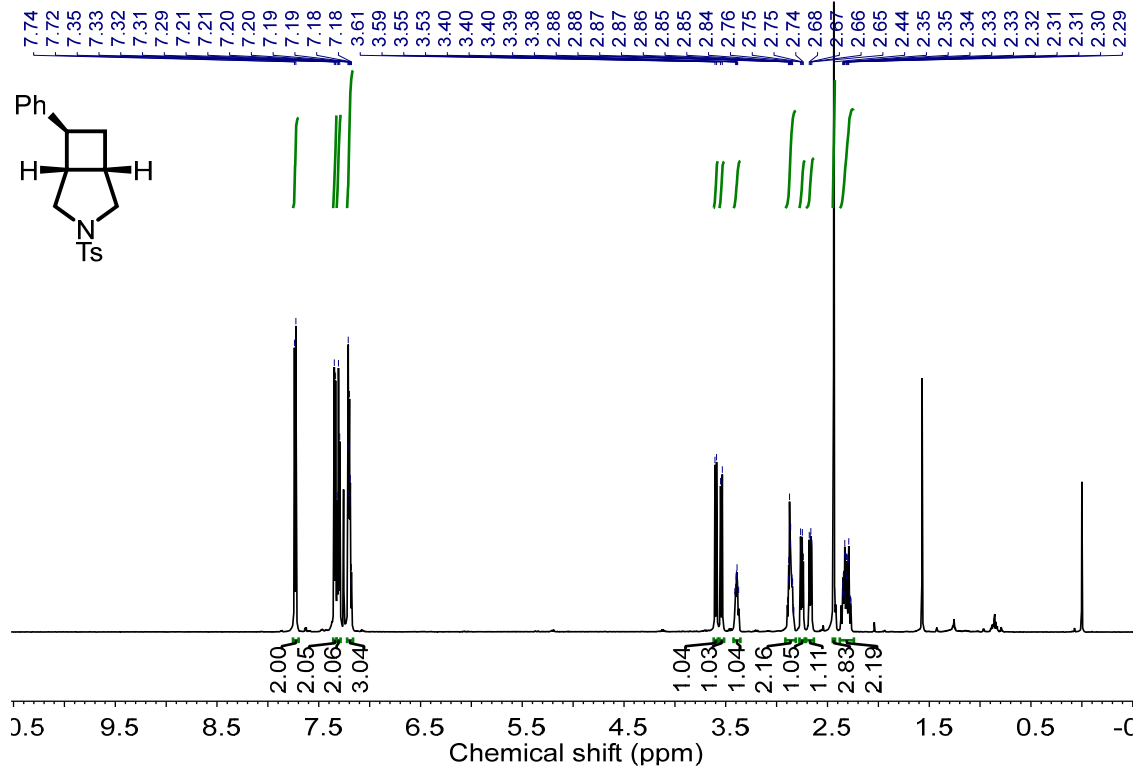

2a, <sup>13</sup>C NMR (151 MHz, CDCl<sub>3</sub>)

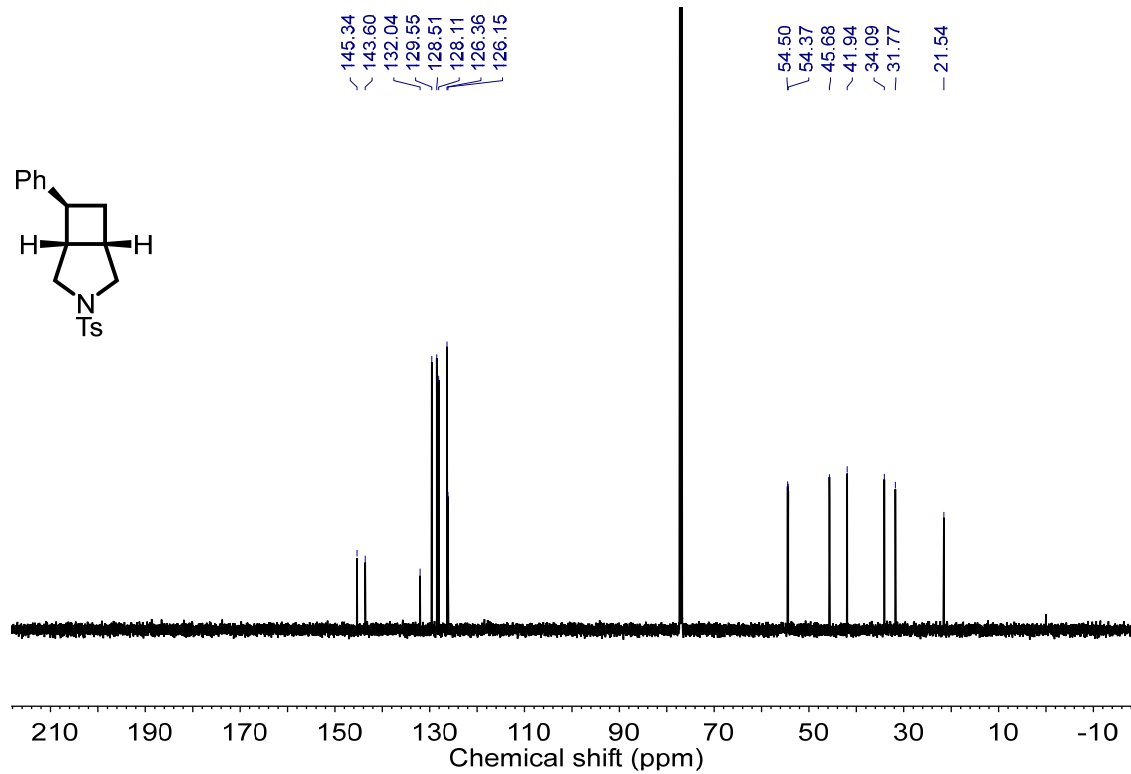

2b, <sup>1</sup>H NMR (600 MHz, CDCl<sub>3</sub>)

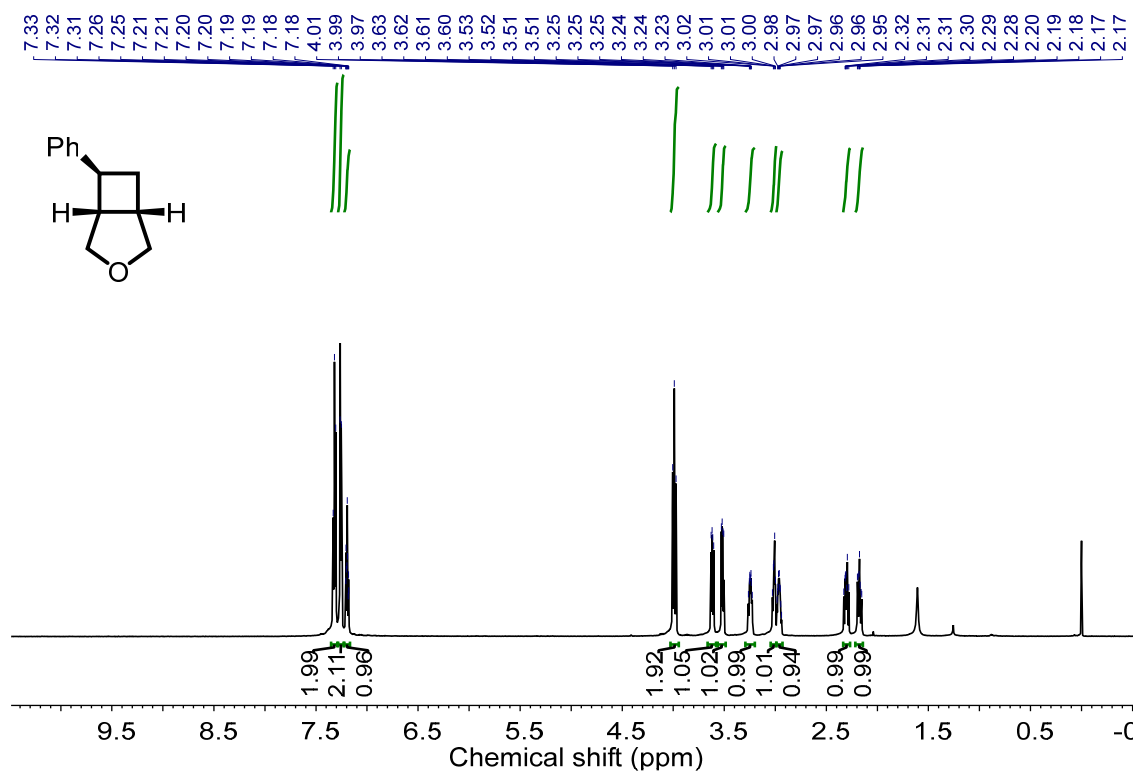

2b, <sup>13</sup>C NMR (151 MHz, CDCl<sub>3</sub>)

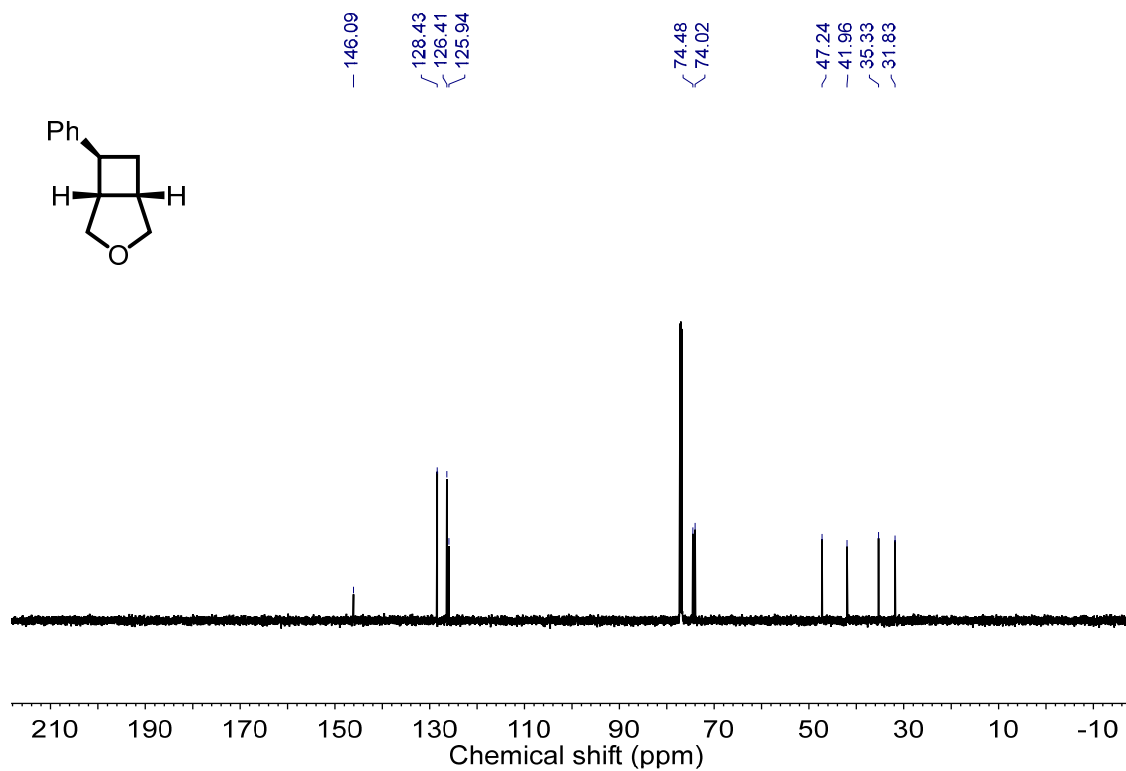

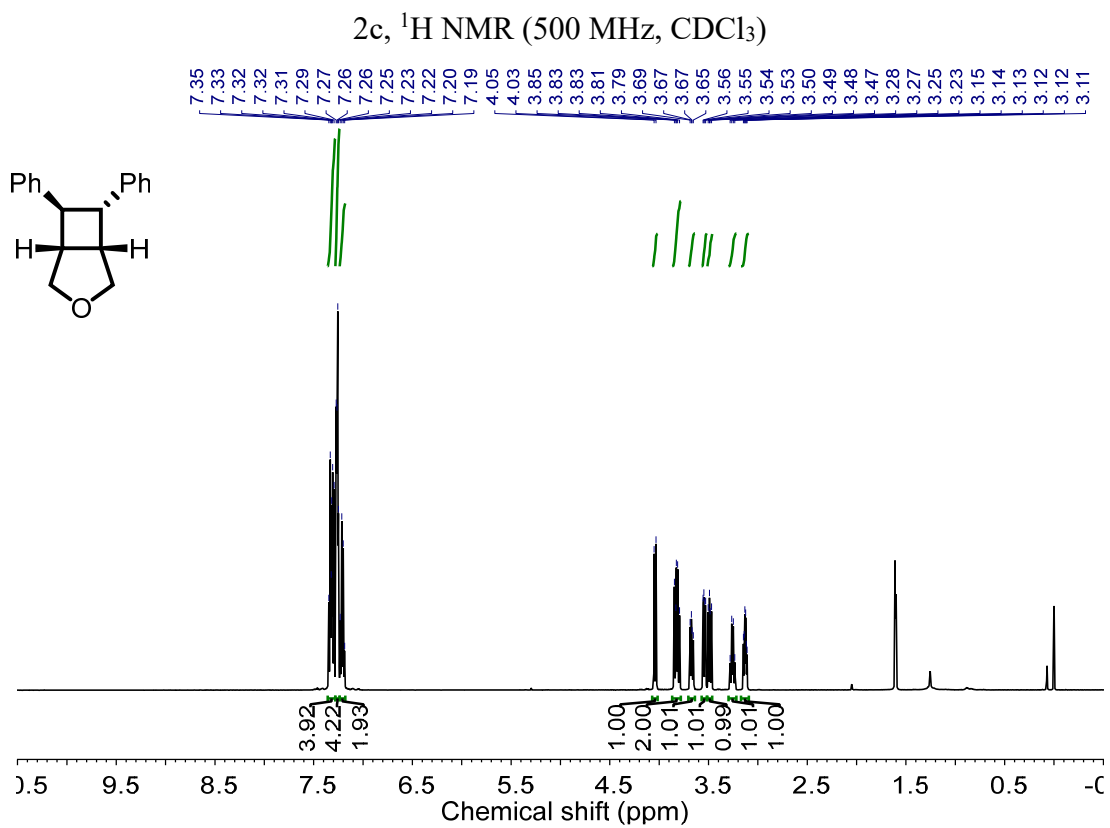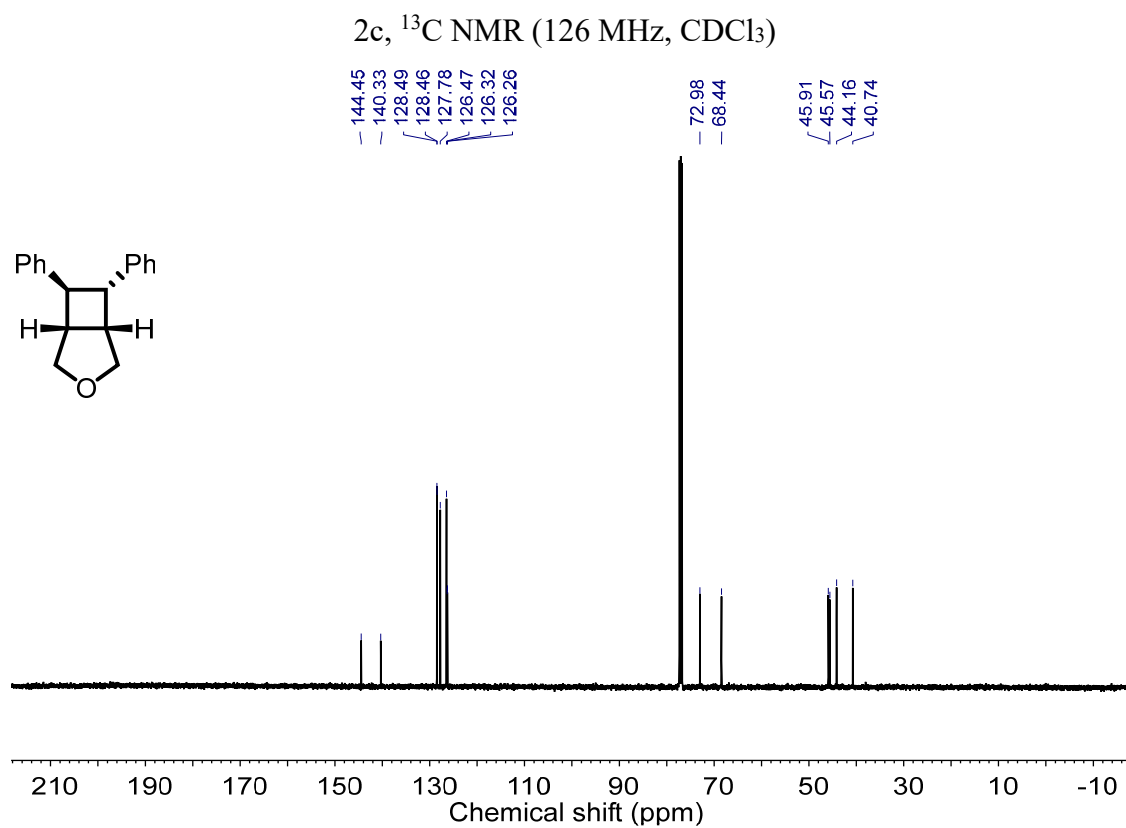

2c, <sup>1</sup>H NMR (500 MHz, CDCl<sub>3</sub>)

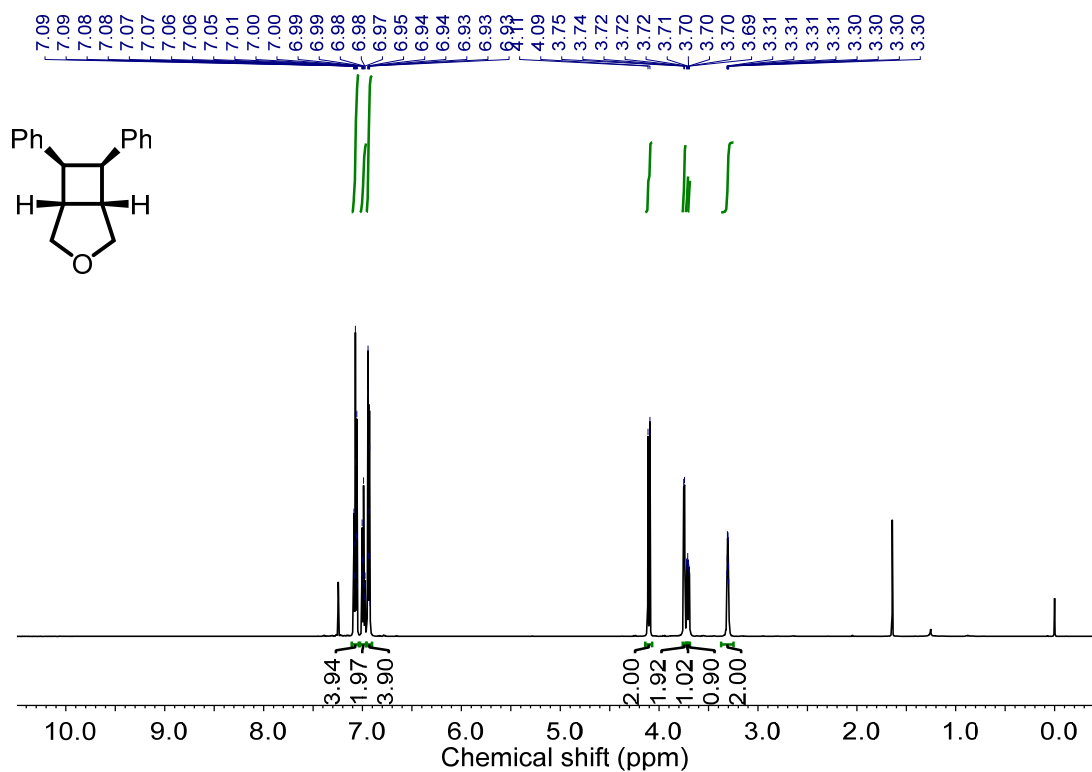

2c, <sup>13</sup>C NMR (126 MHz, CDCl<sub>3</sub>)

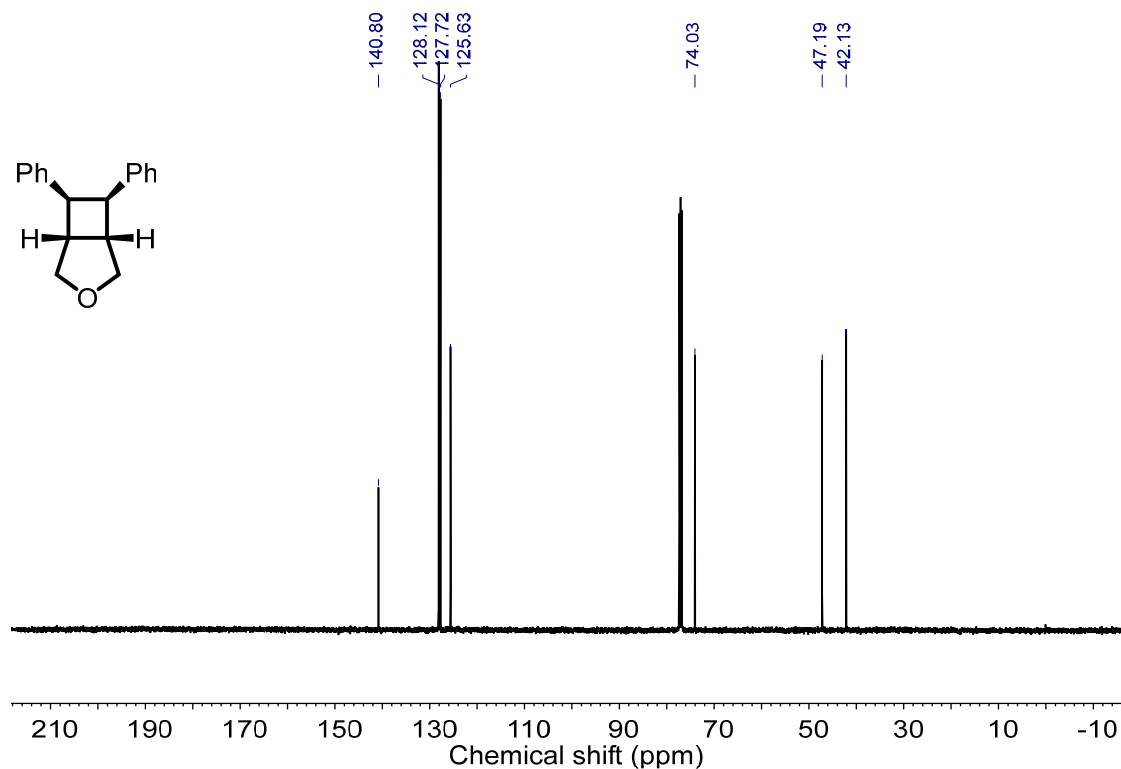

2d, <sup>1</sup>H NMR (600 MHz, CDCl<sub>3</sub>)

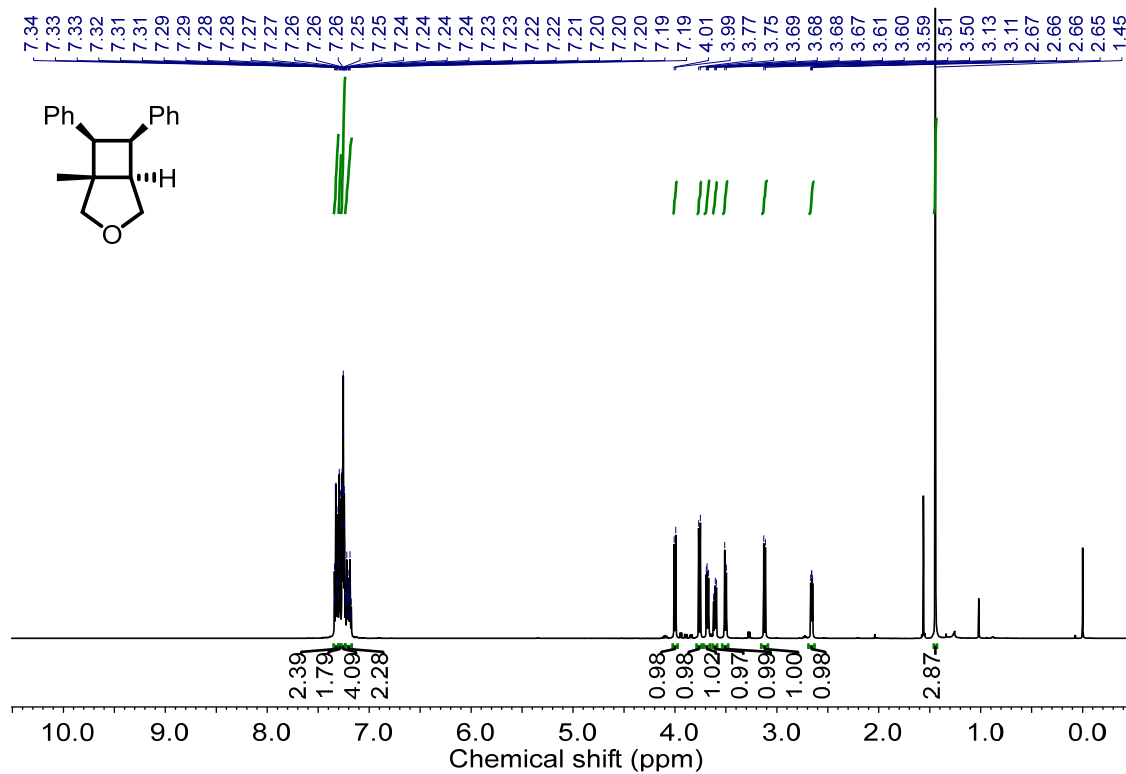

2d, <sup>13</sup>C NMR (151 MHz, CDCl<sub>3</sub>)

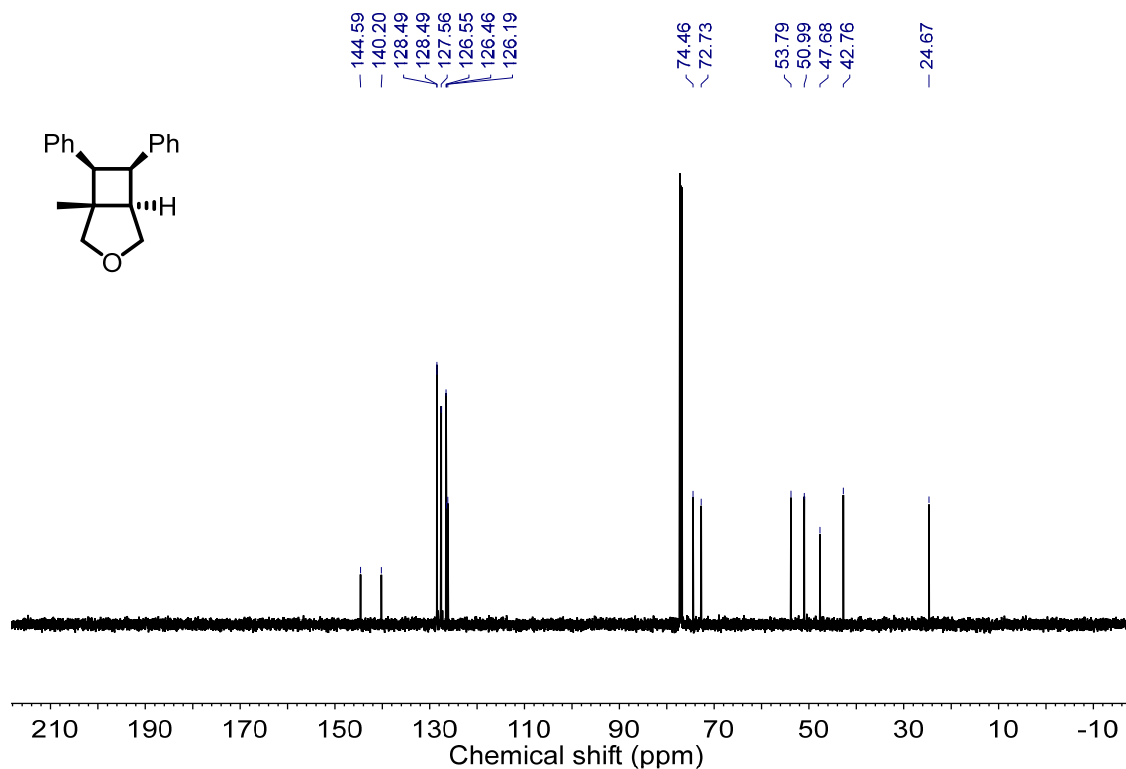

2d, <sup>1</sup>H NMR (600 MHz, CDCl<sub>3</sub>)

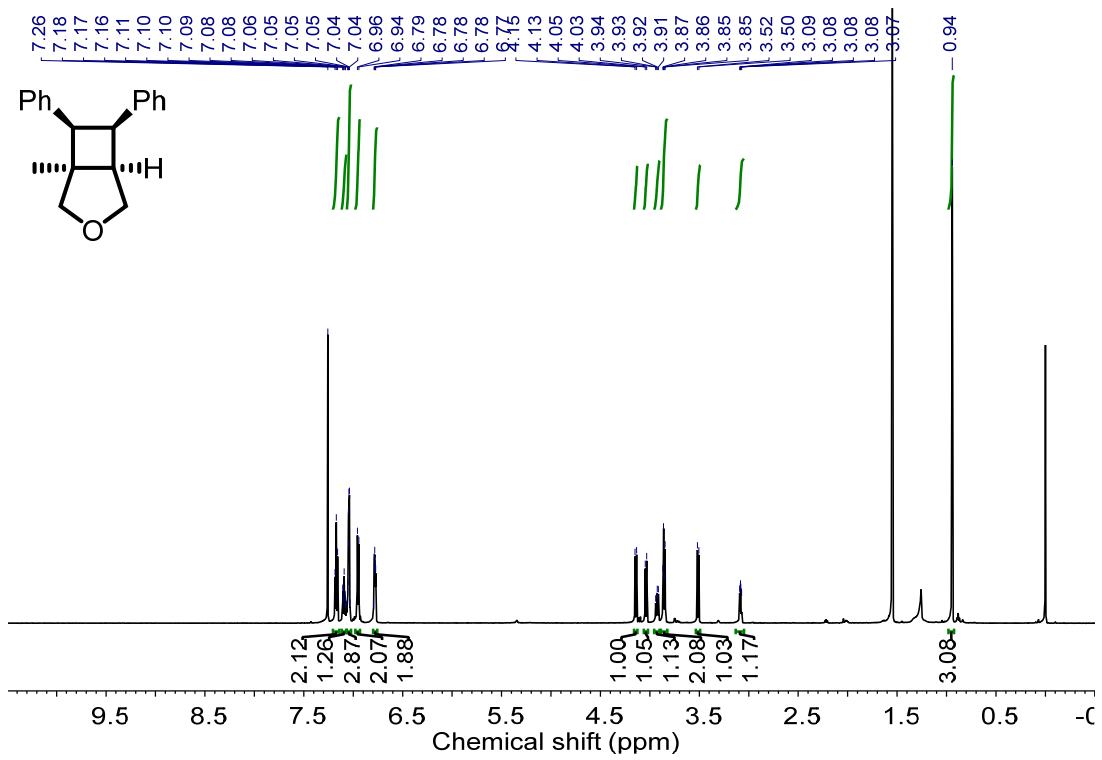

2d, <sup>13</sup>C NMR (151 MHz, CDCl<sub>3</sub>)

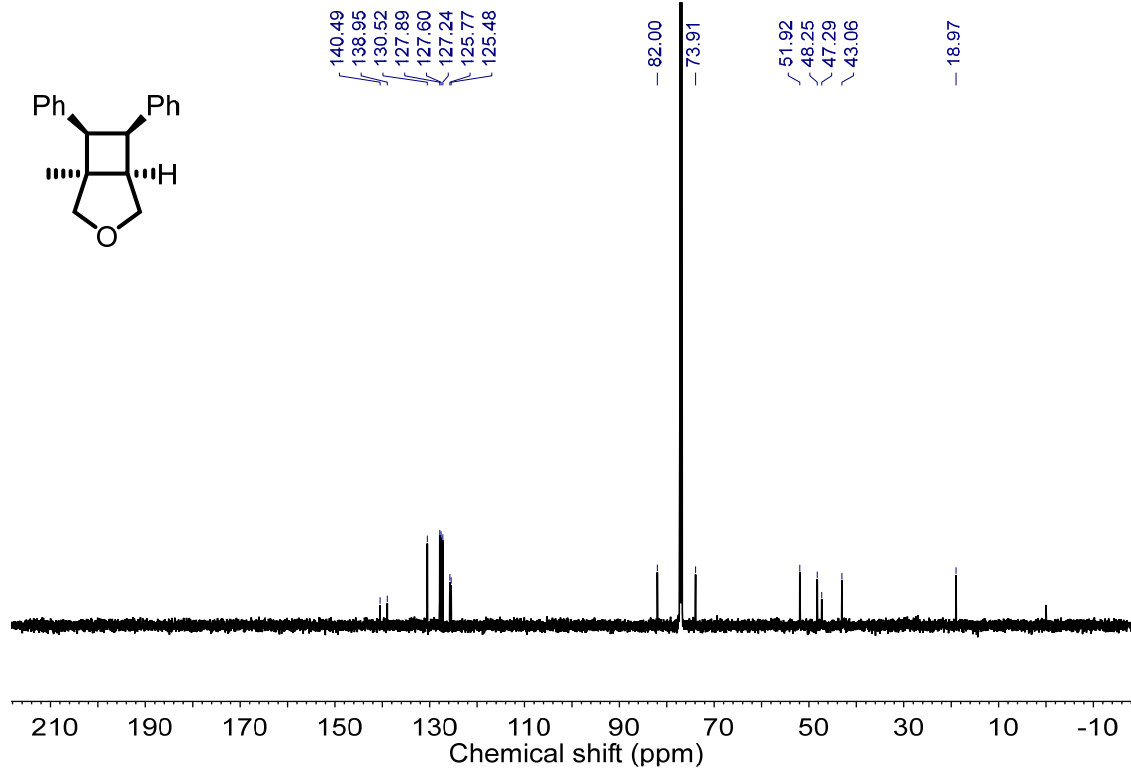

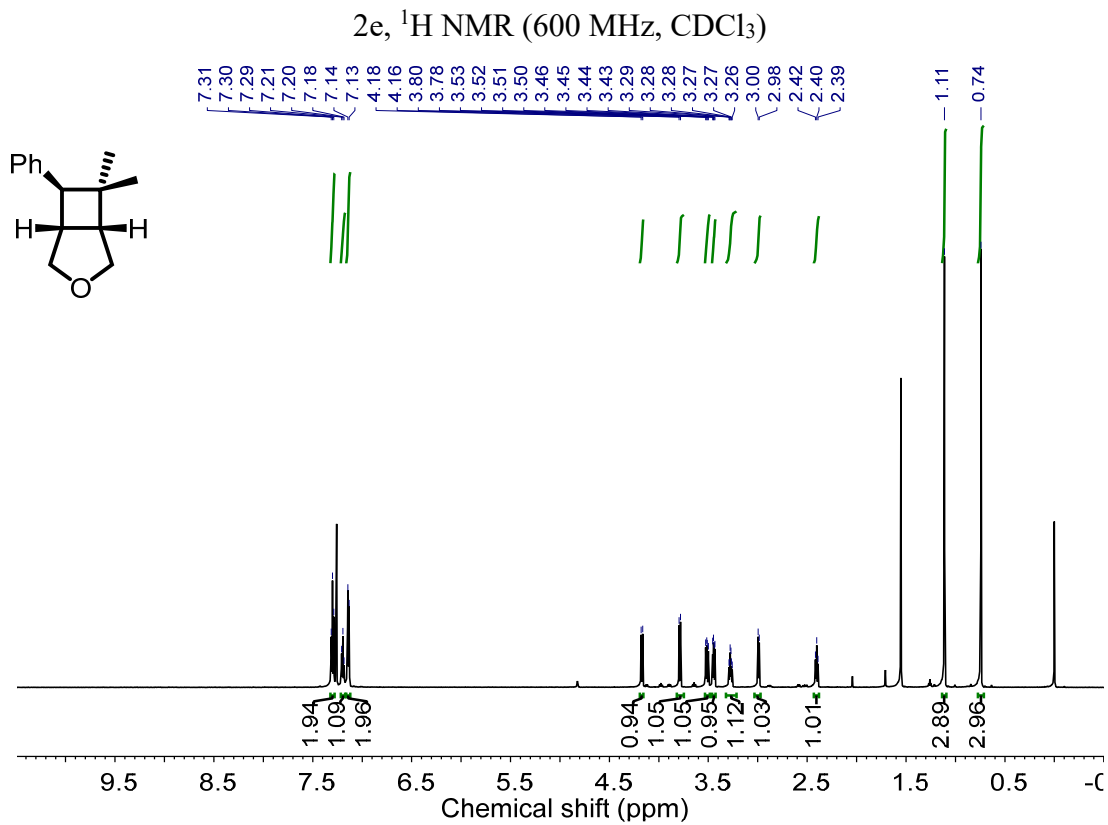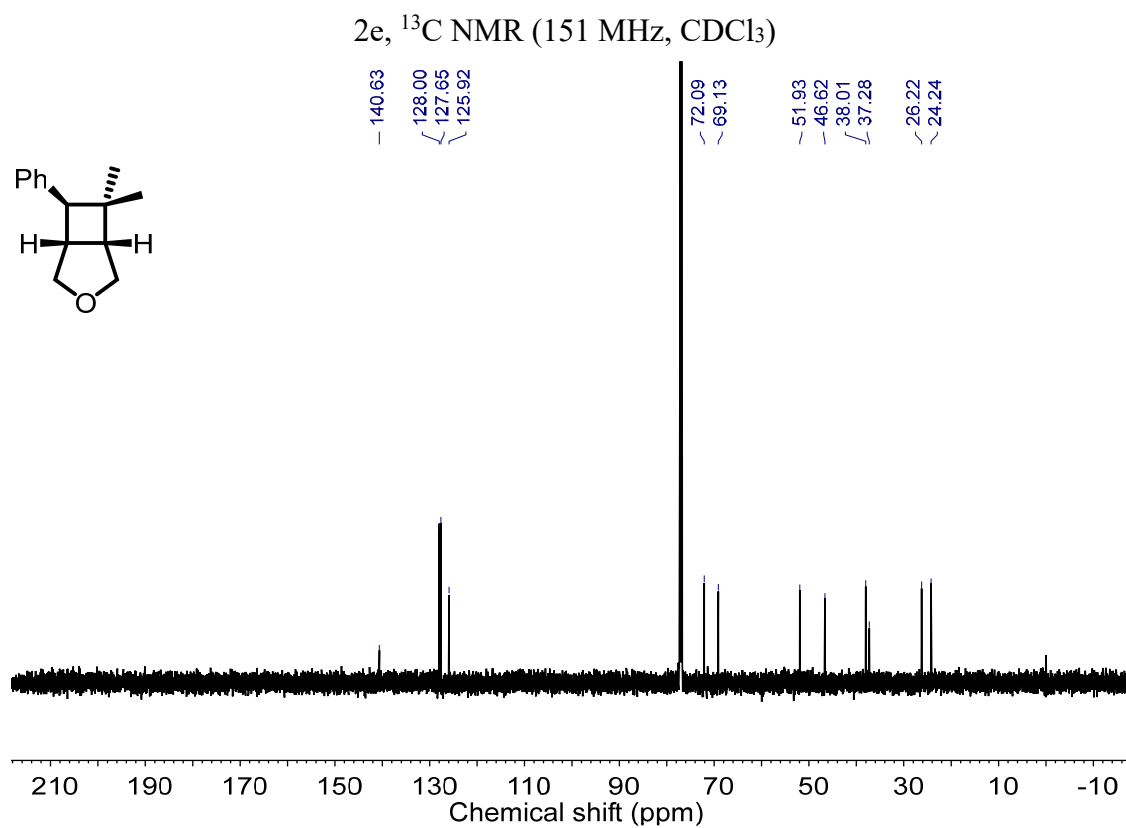



2f,  $^1\text{H}$  NMR (600 MHz,  $\text{CDCl}_3$ )

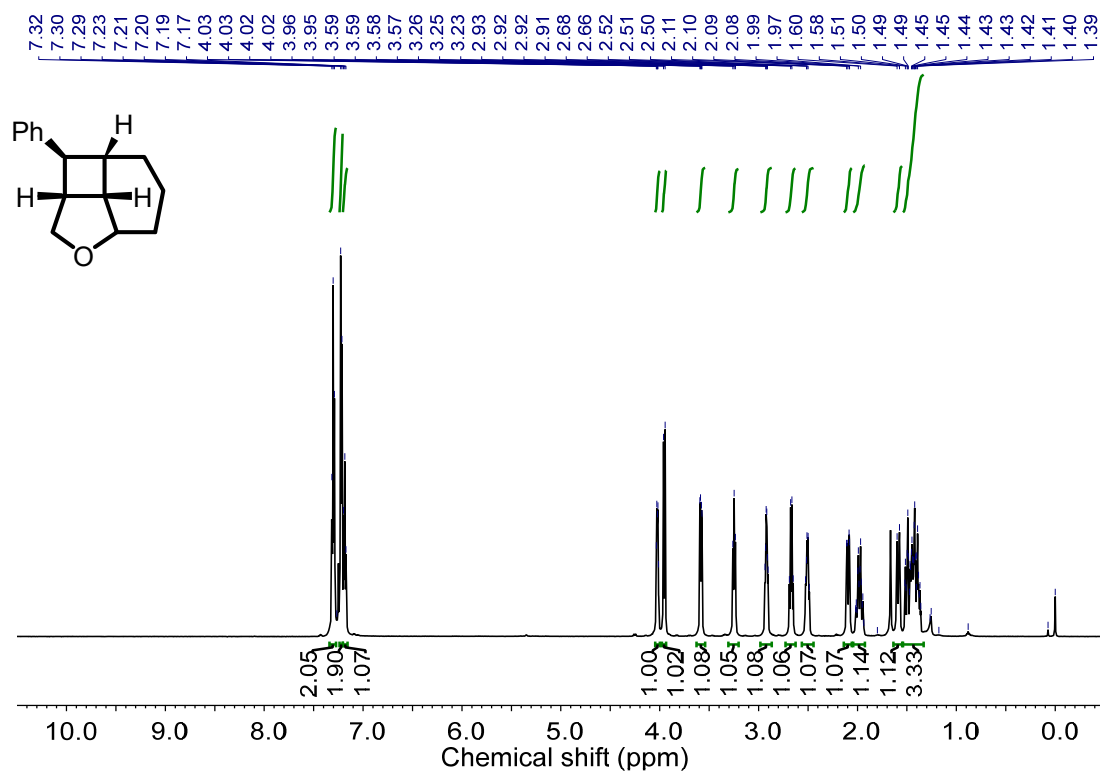

2f,  $^{13}\text{C}$  NMR (151 MHz,  $\text{CDCl}_3$ )

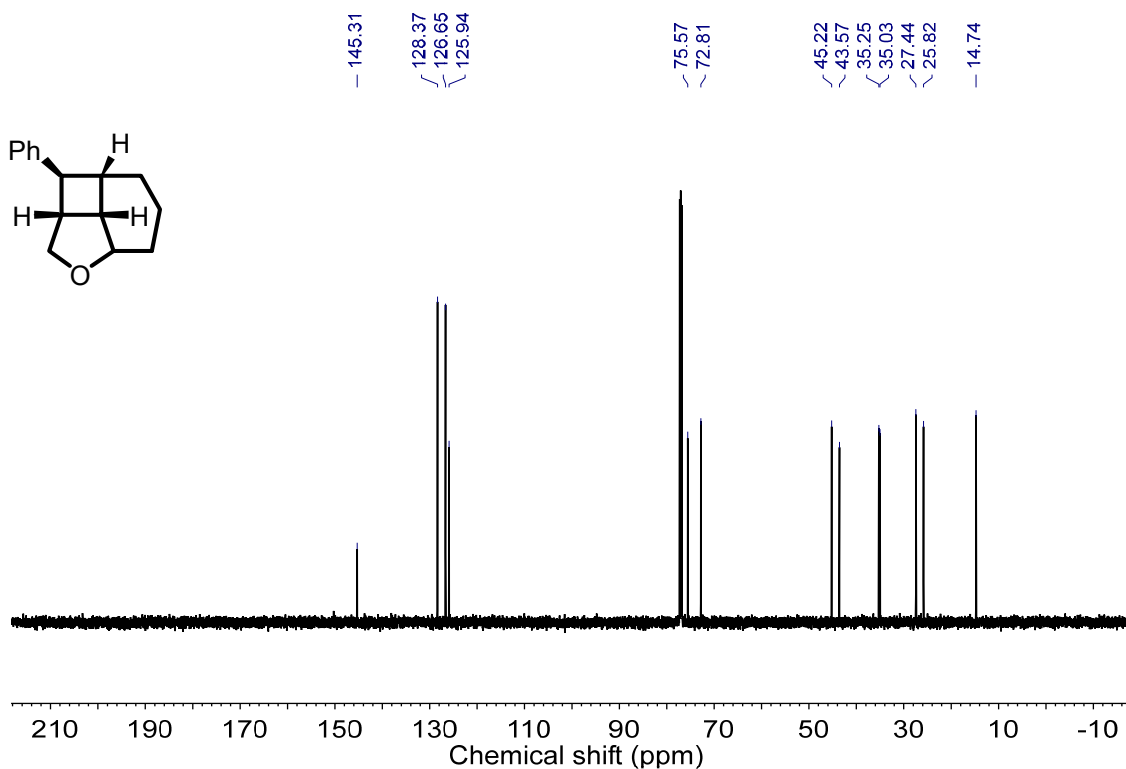

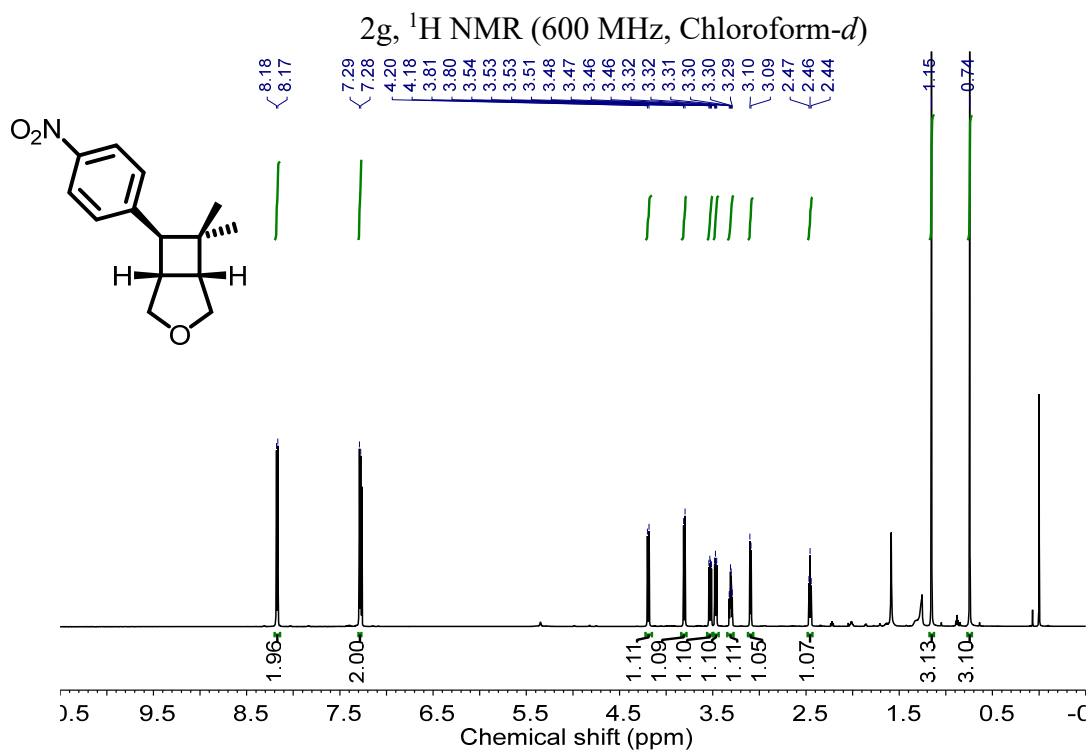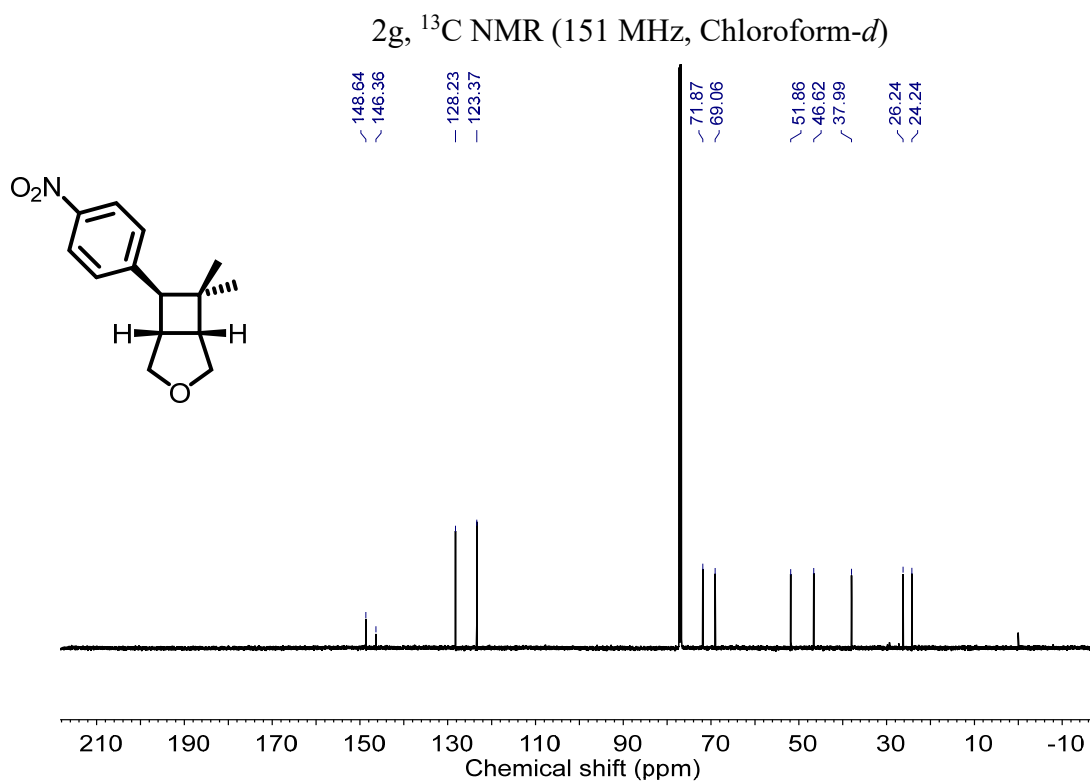

(E)-1h and (Z)-1h, <sup>1</sup>H NMR (400 MHz, Chloroform-d)

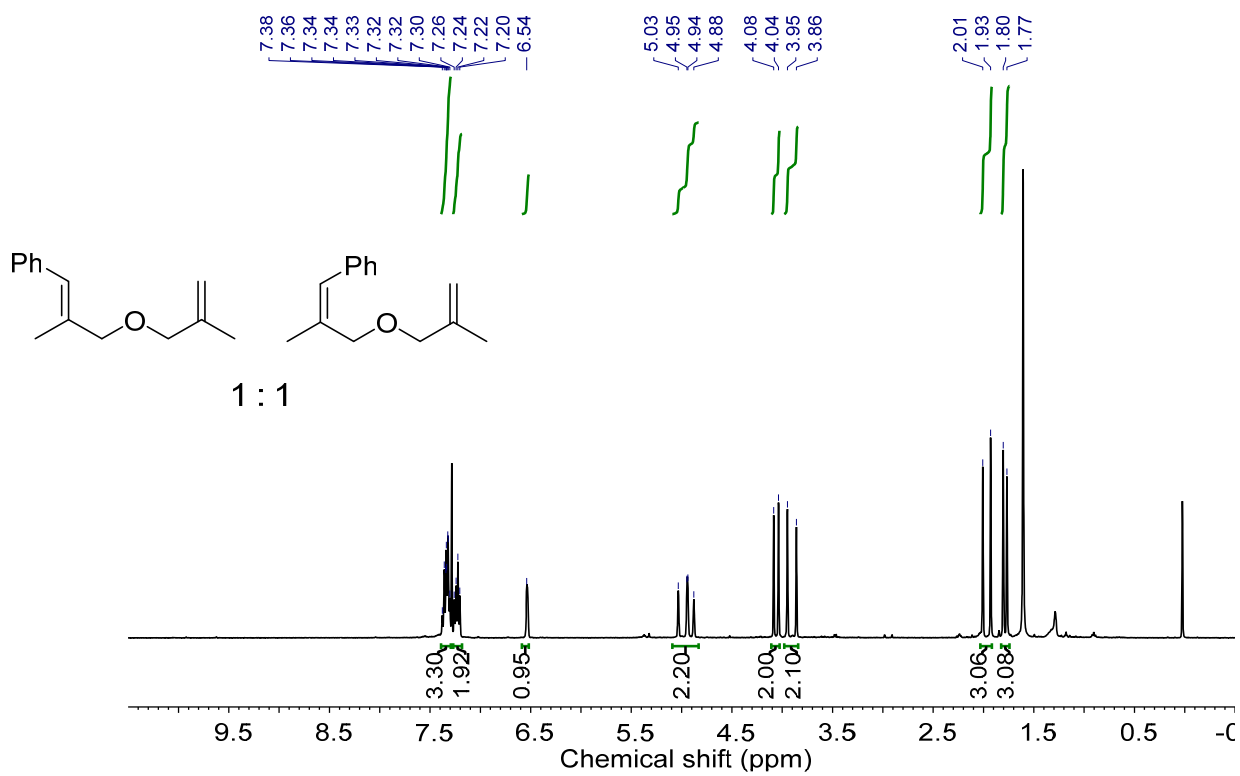

4a, <sup>1</sup>H NMR (400 MHz, CDCl<sub>3</sub>)

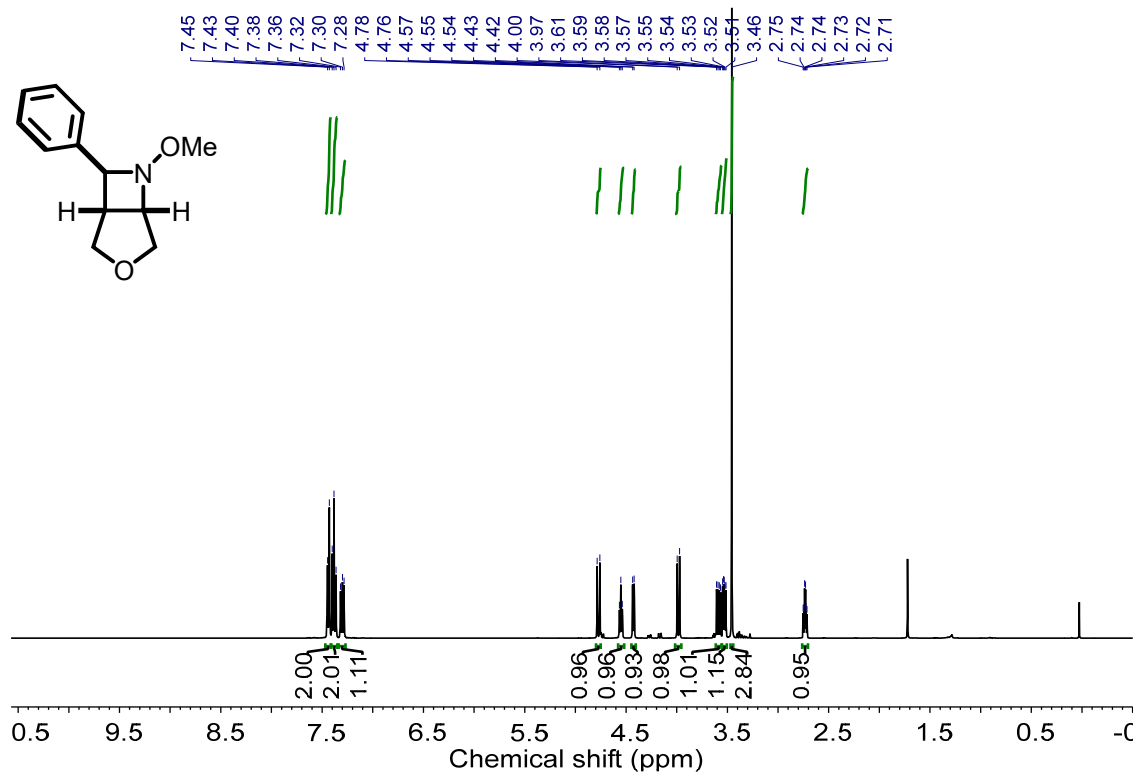

4a, <sup>13</sup>C NMR (101 MHz, CDCl<sub>3</sub>)

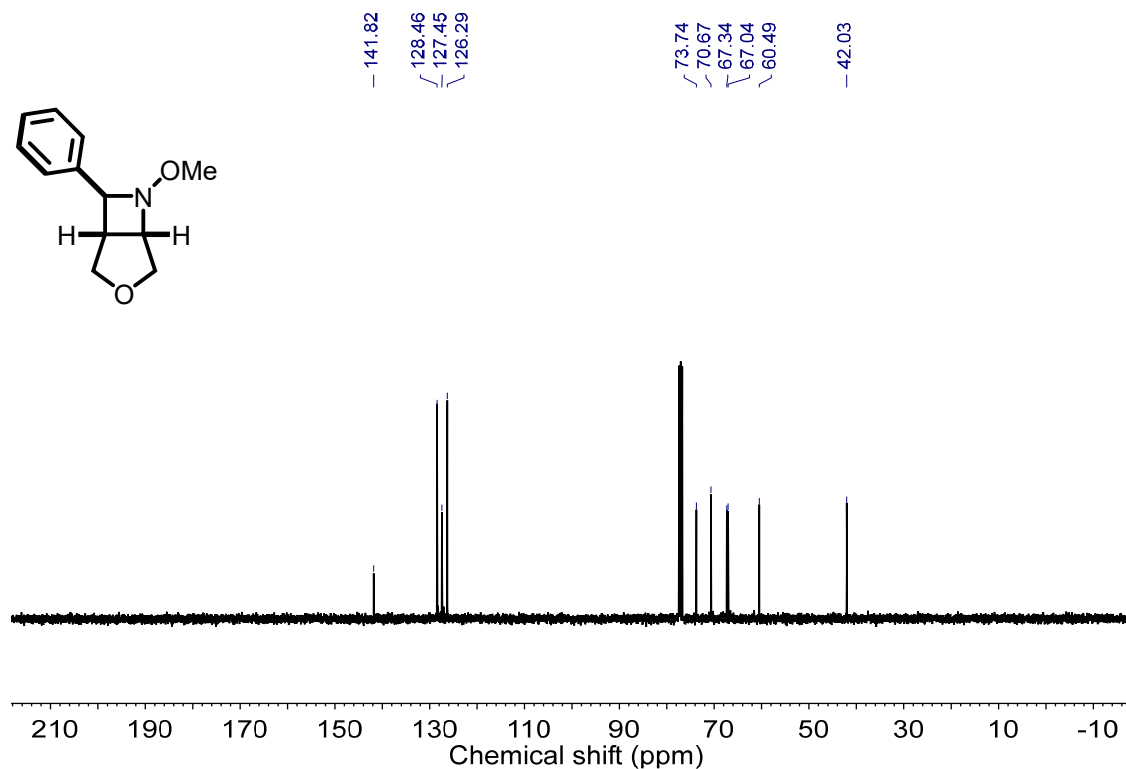

4b, <sup>1</sup>H NMR (400 MHz, CDCl<sub>3</sub>)

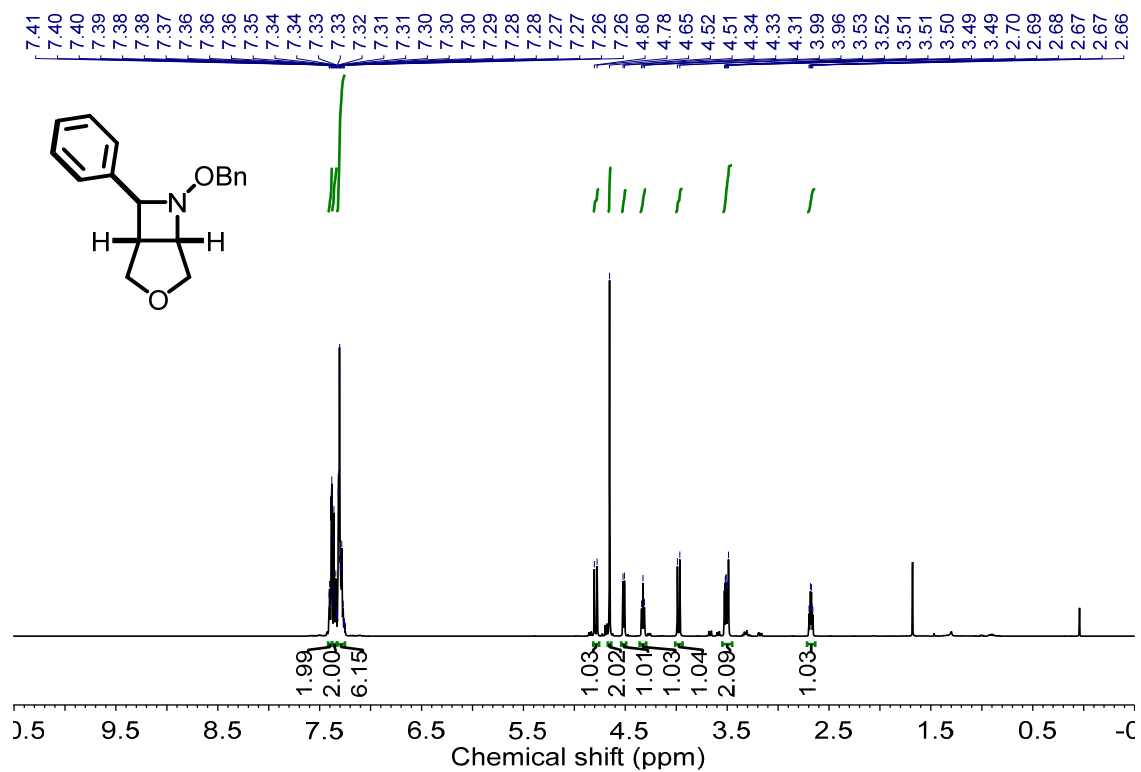

4b, <sup>13</sup>C NMR (101 MHz, CDCl<sub>3</sub>)

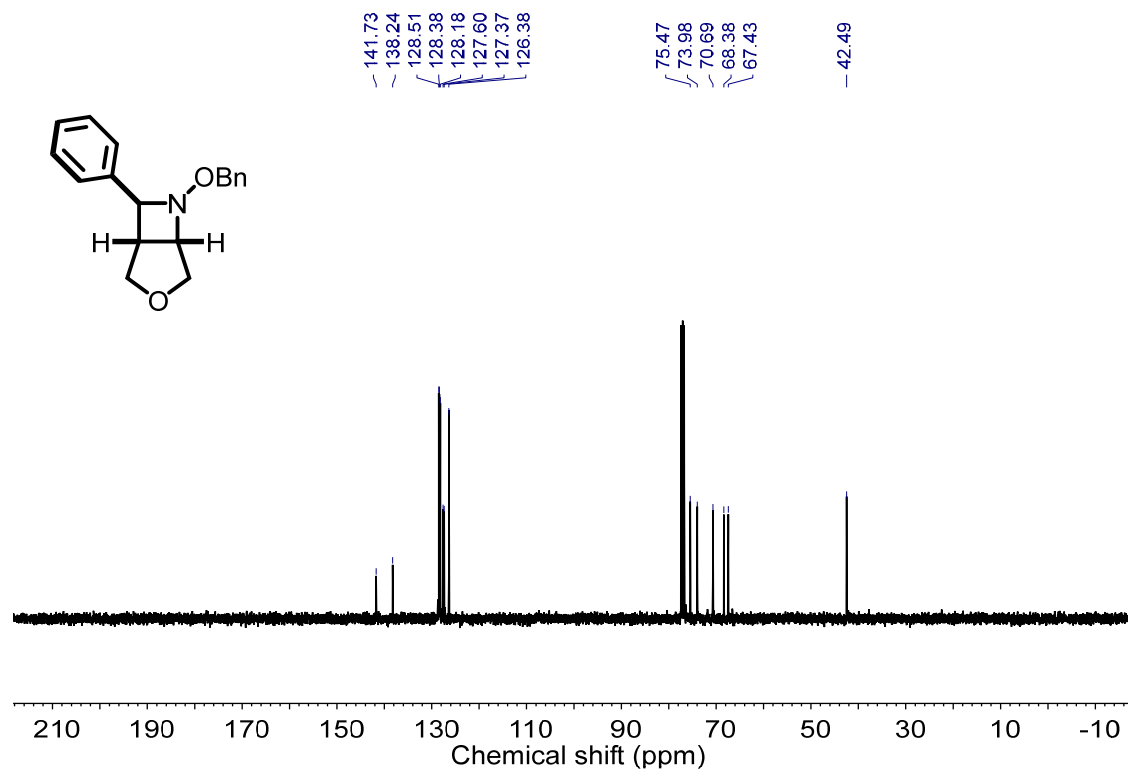

4c, <sup>1</sup>H NMR (400 MHz, CDCl<sub>3</sub>)

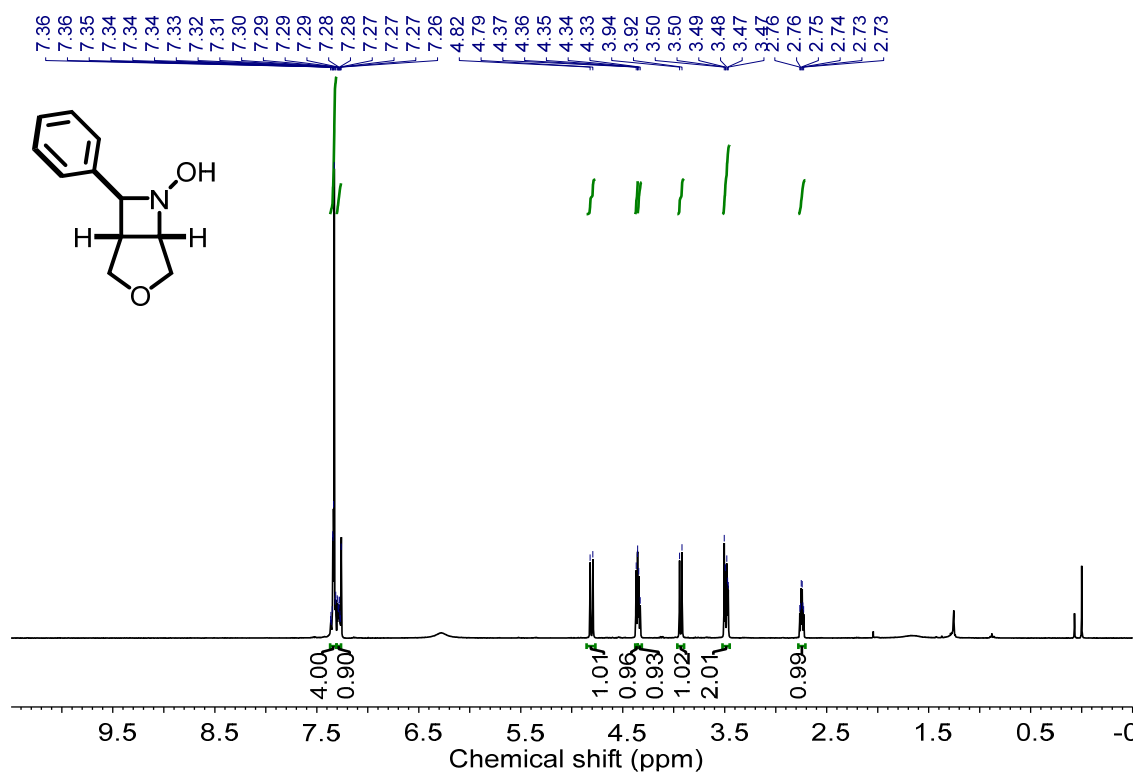

4c, <sup>13</sup>C NMR (151 MHz, CDCl<sub>3</sub>)

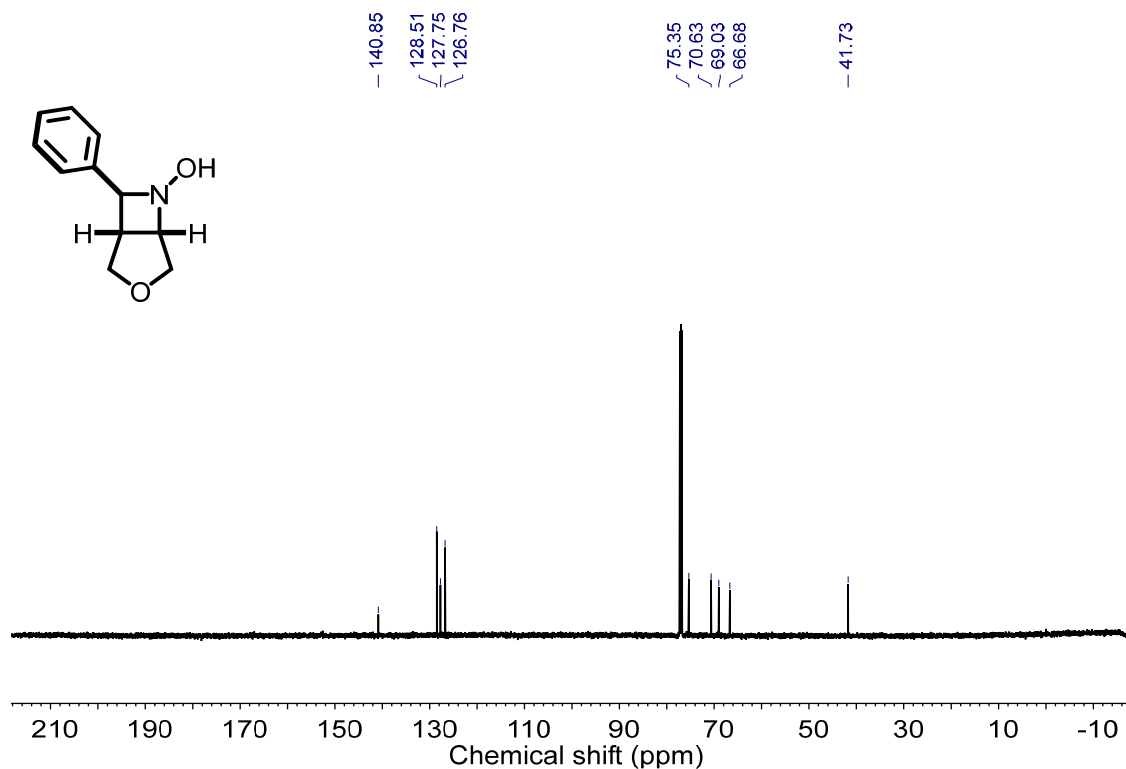

4d, <sup>1</sup>H NMR (600 MHz, CDCl<sub>3</sub>)

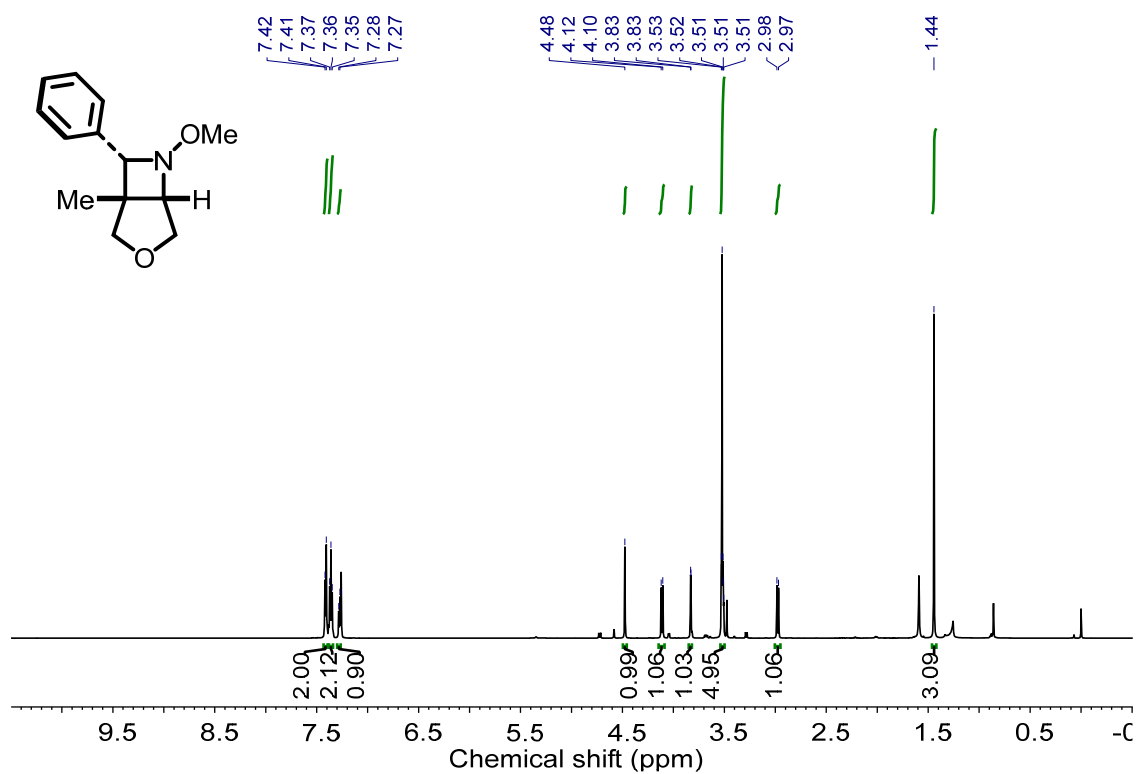

4d, <sup>13</sup>C NMR (151 MHz, CDCl<sub>3</sub>)

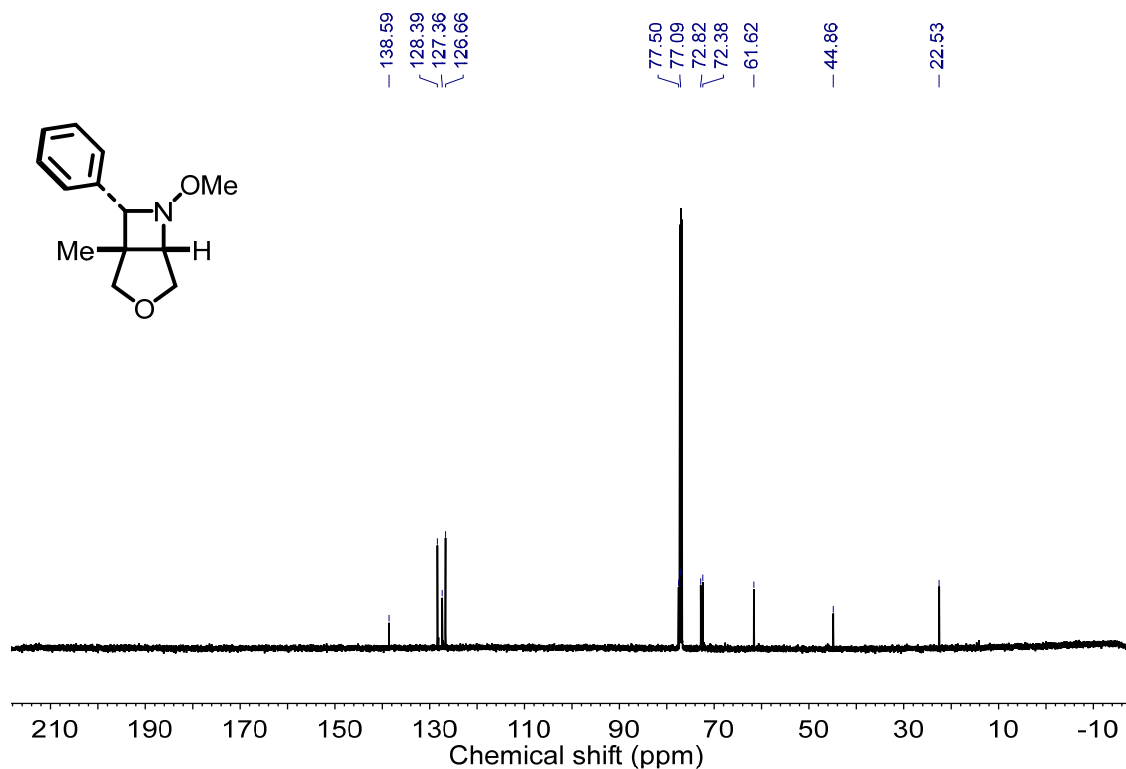

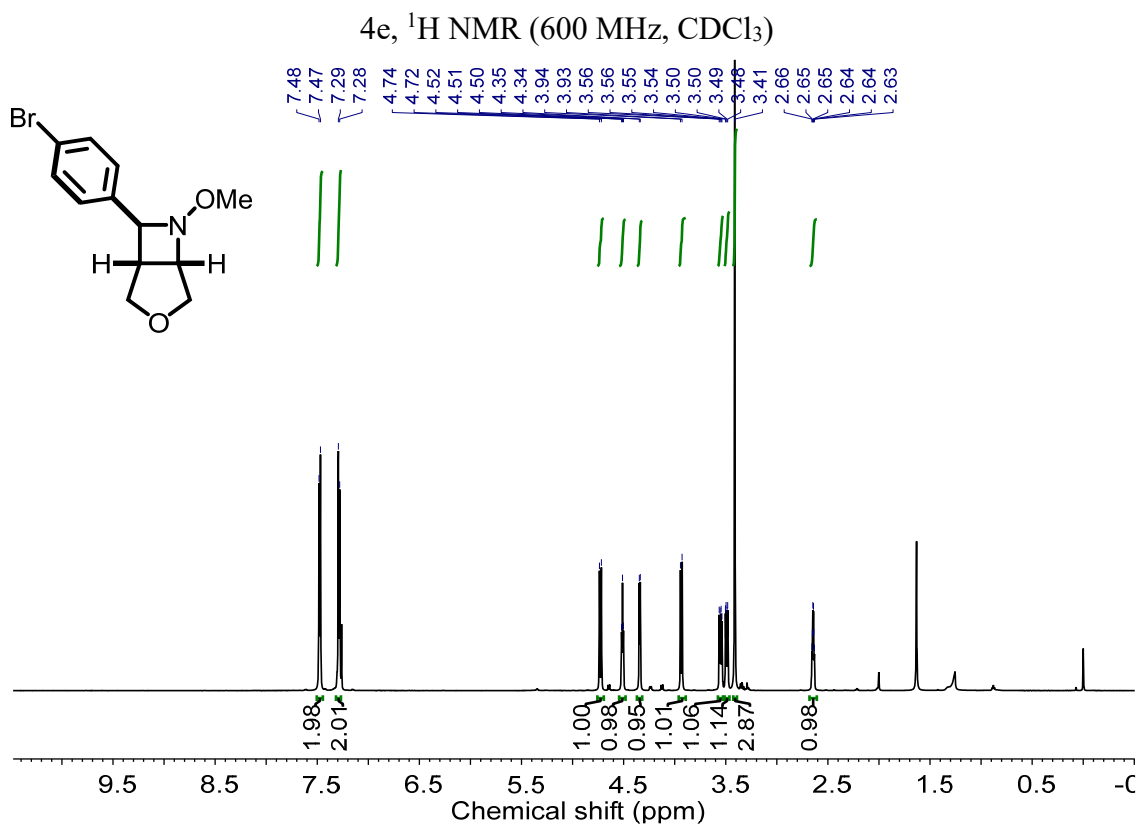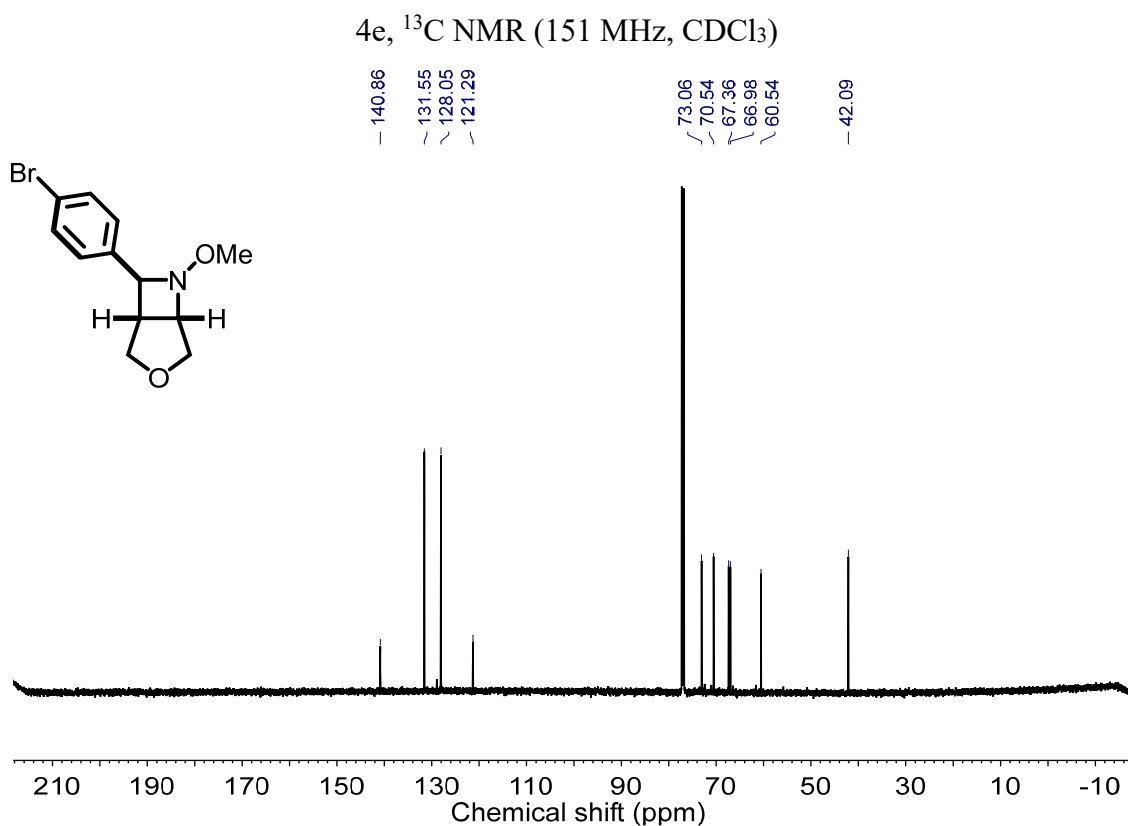



4f, <sup>1</sup>H NMR (600 MHz, CDCl<sub>3</sub>)

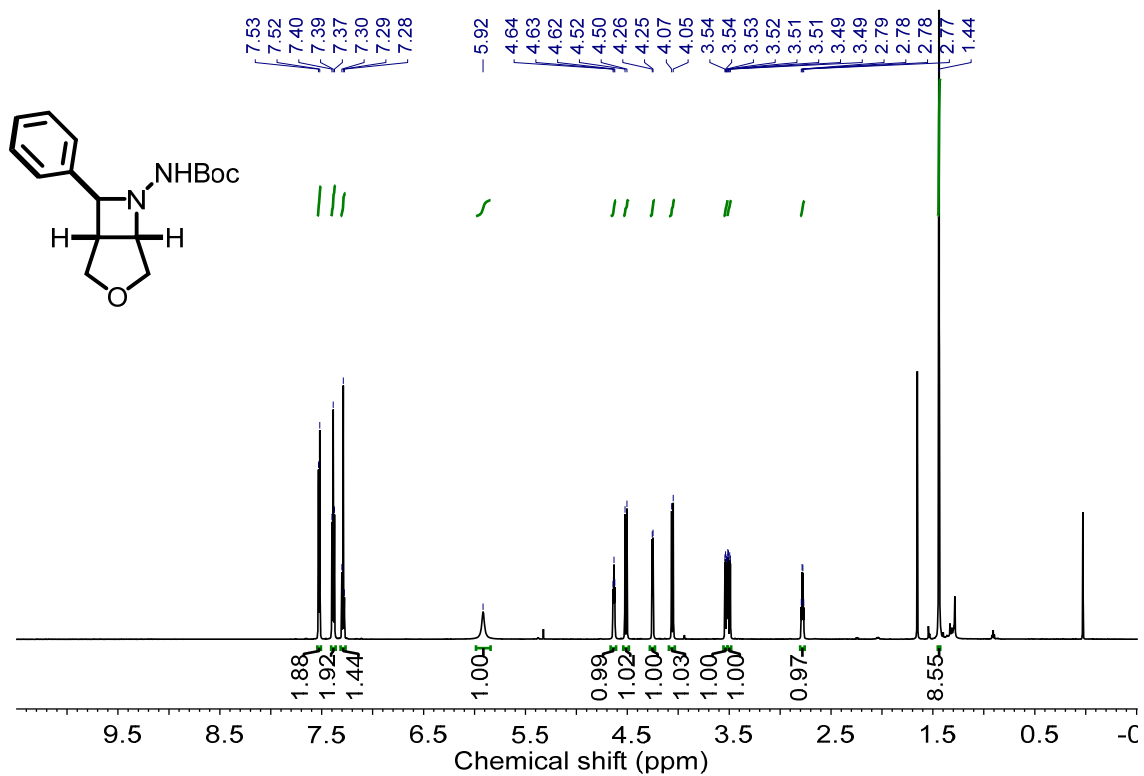

4f, <sup>13</sup>C NMR (151 MHz, CDCl<sub>3</sub>)

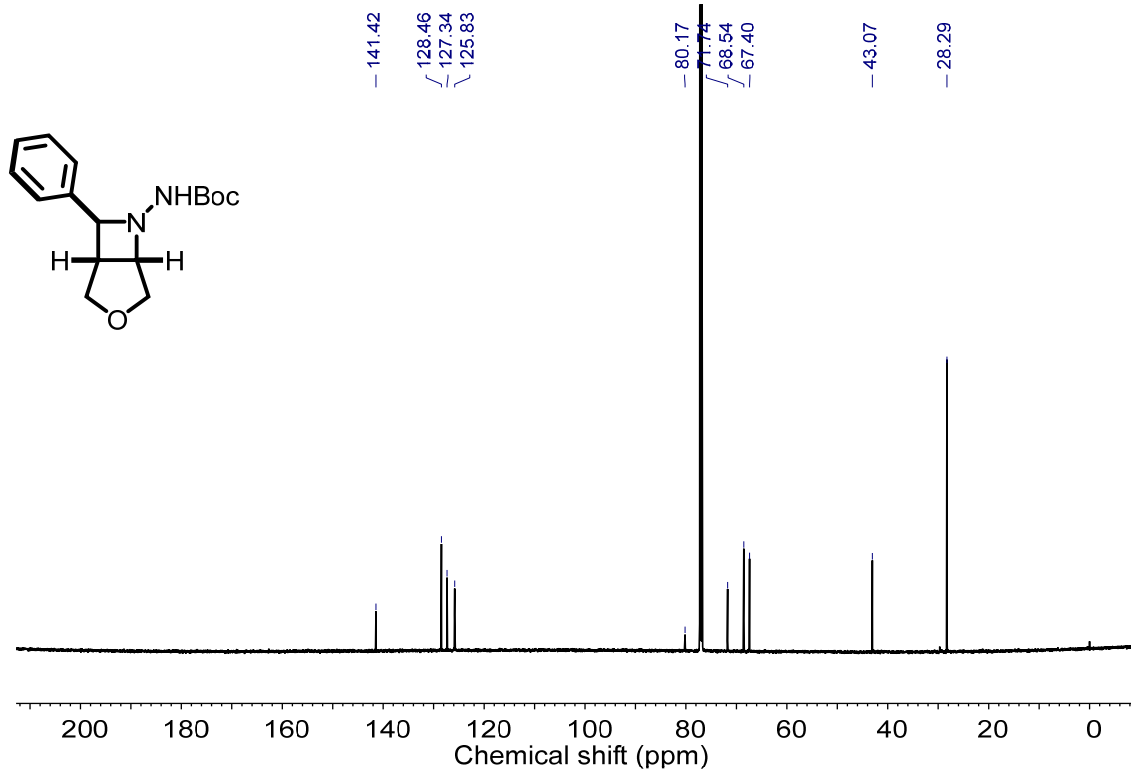

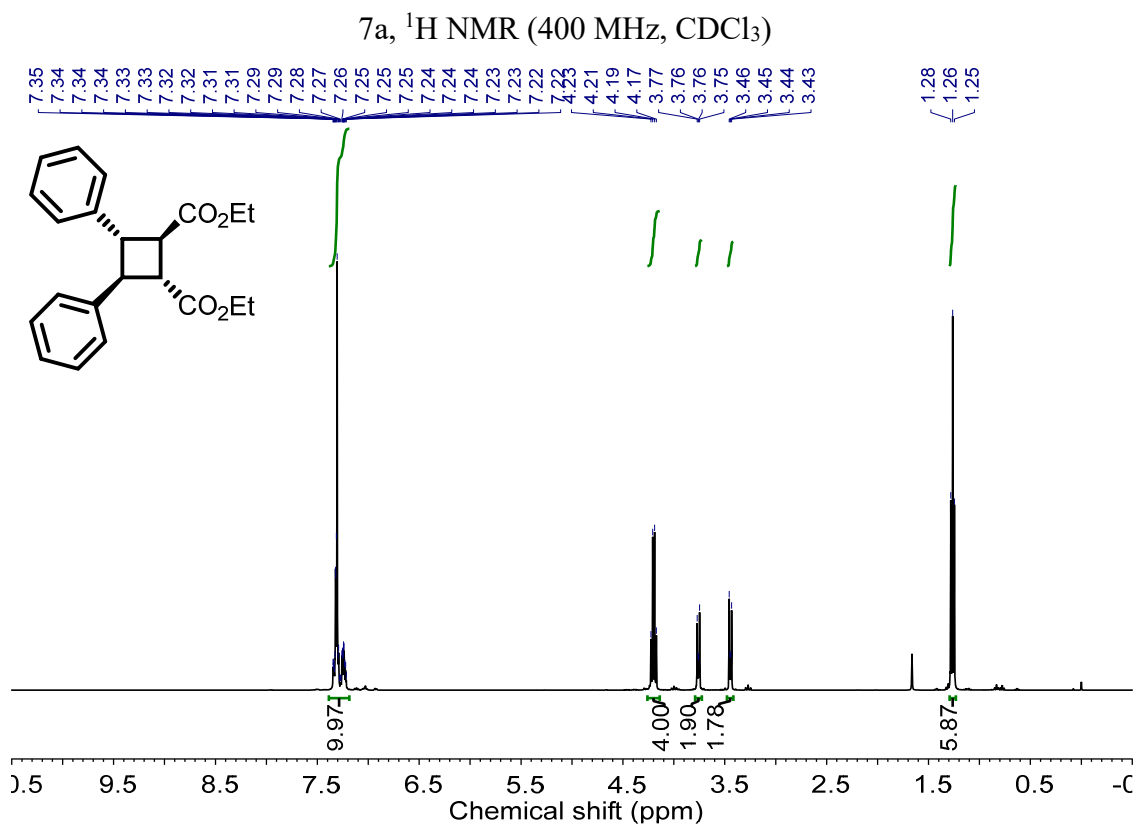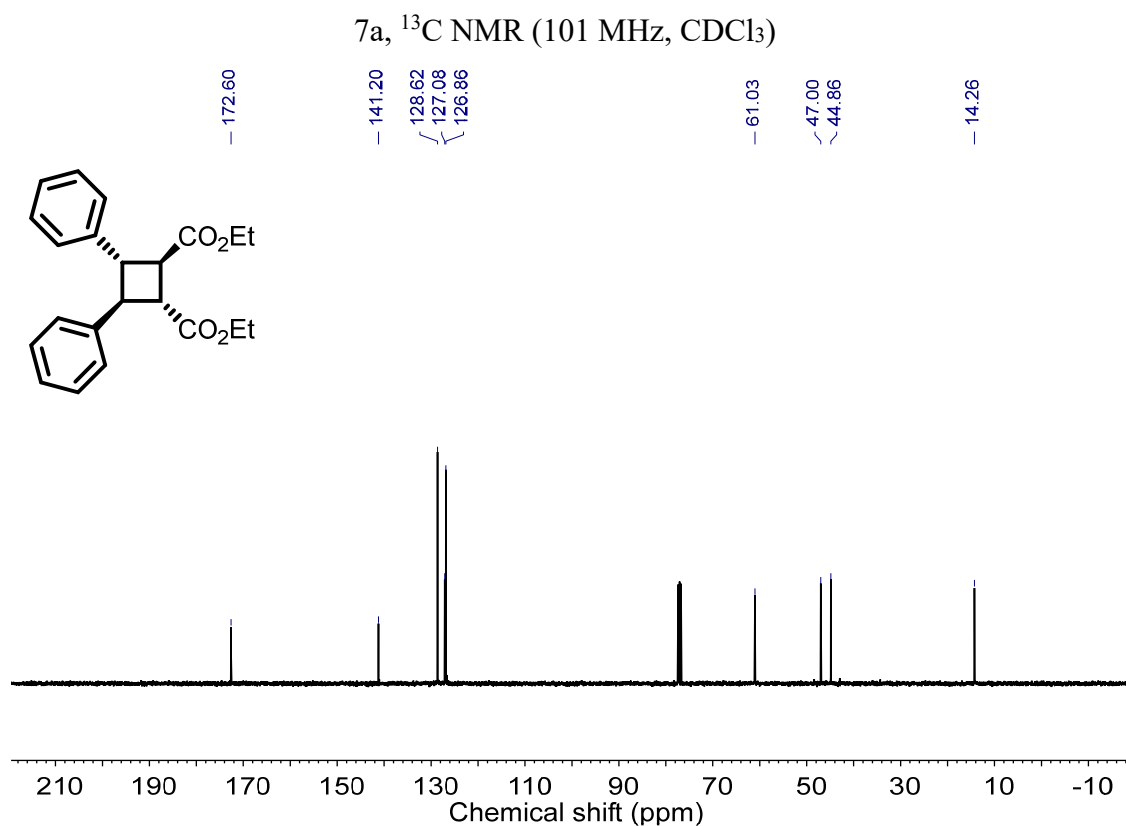

7b, <sup>1</sup>H NMR (400 MHz, CDCl<sub>3</sub>)

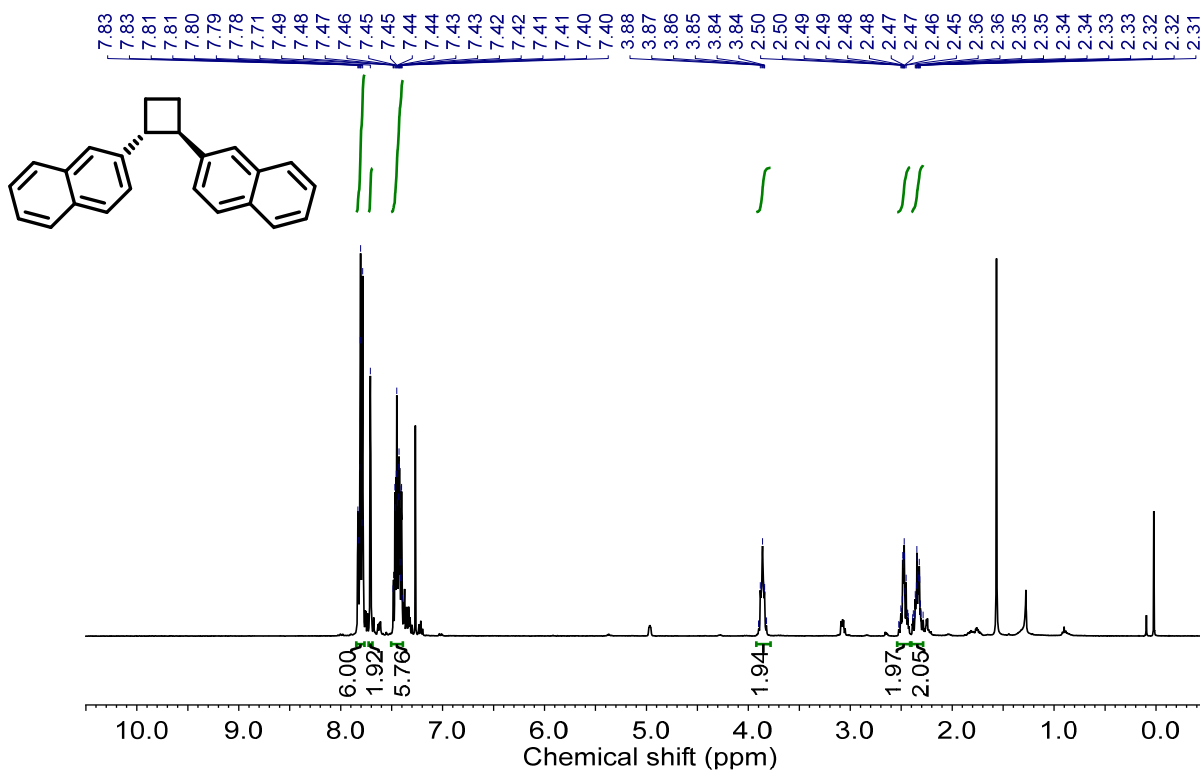

7b, <sup>13</sup>C NMR (101 MHz, CDCl<sub>3</sub>)

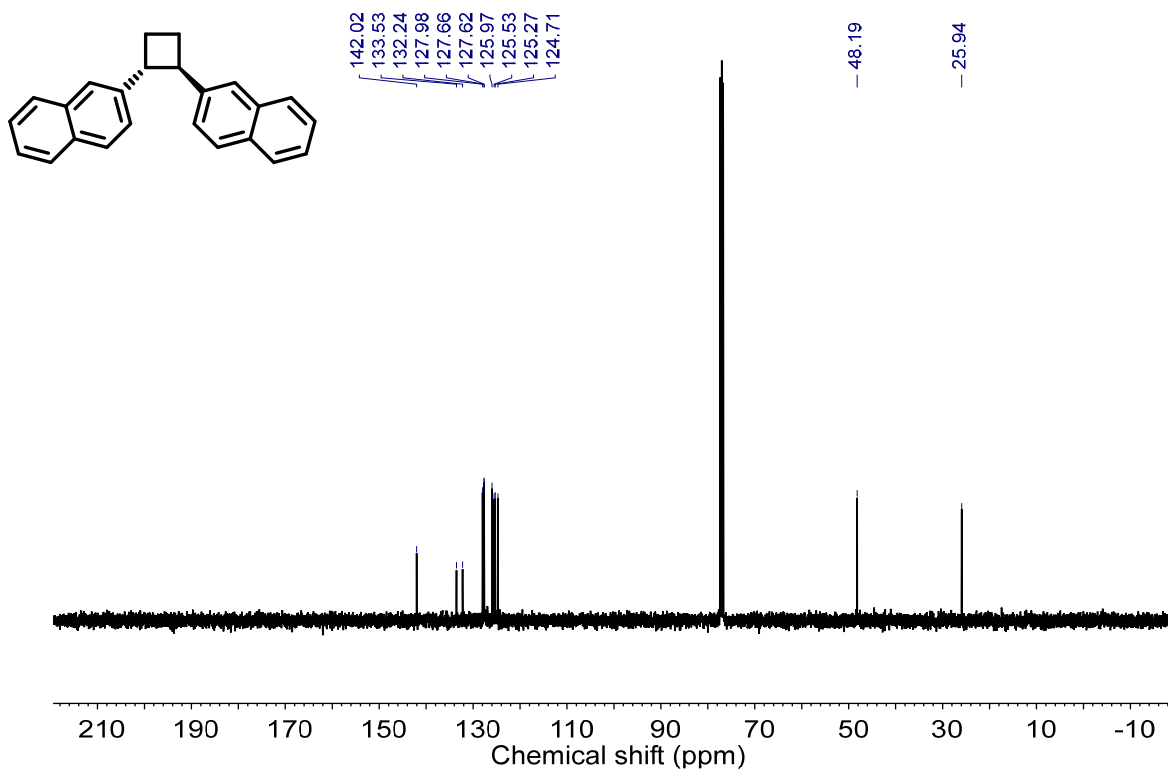

7c,  $^1\text{H}$  NMR (600 MHz,  $\text{CDCl}_3$ )

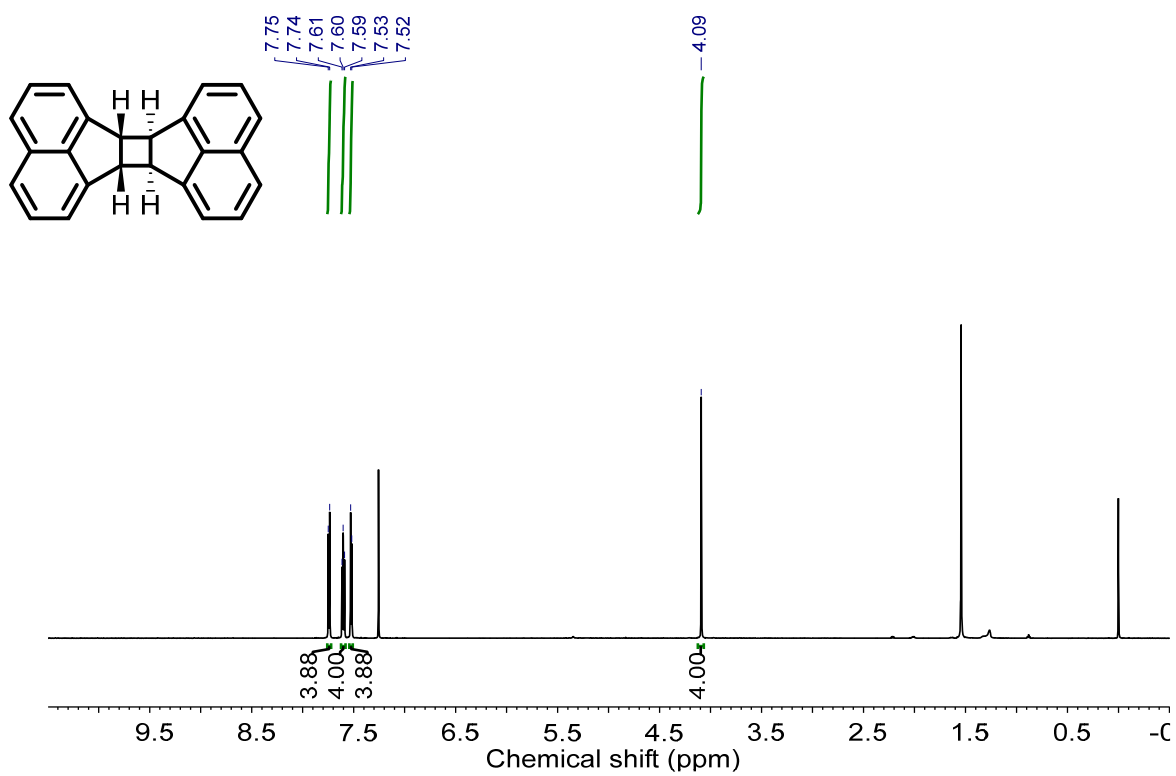

7c,  $^{13}\text{C}$  NMR (151 MHz,  $\text{CDCl}_3$ )

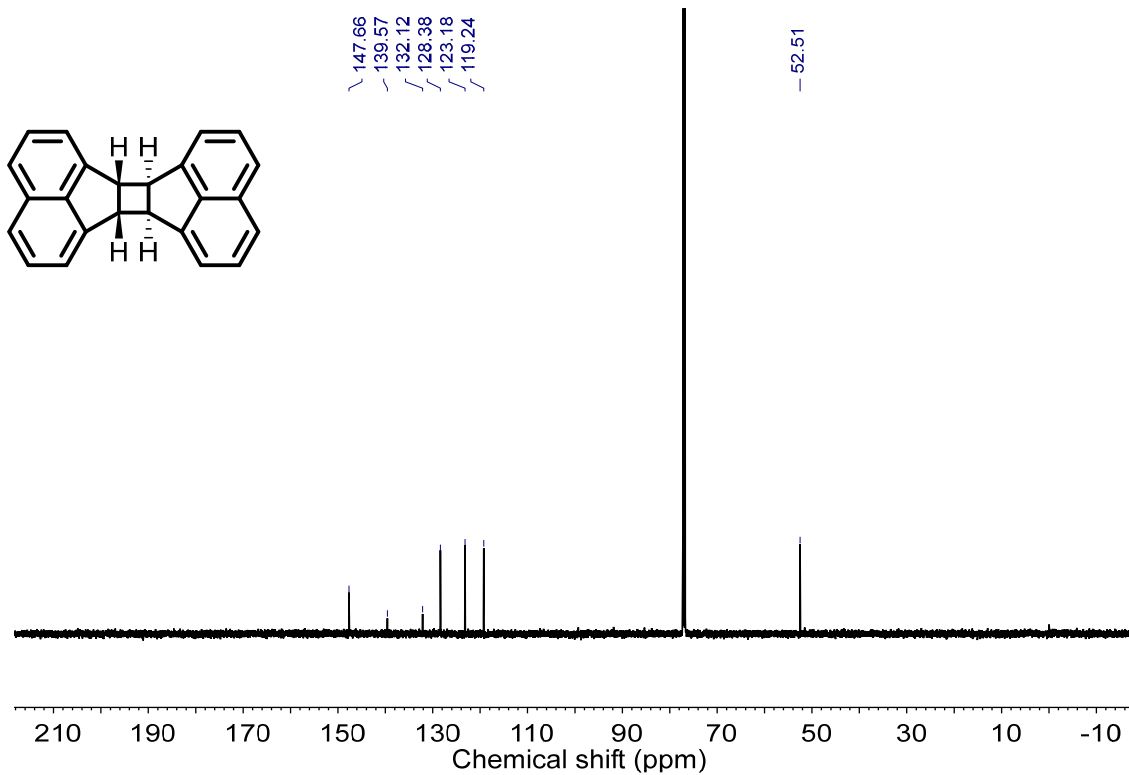

7c,  $^1\text{H}$  NMR (600 MHz,  $\text{CDCl}_3$ )

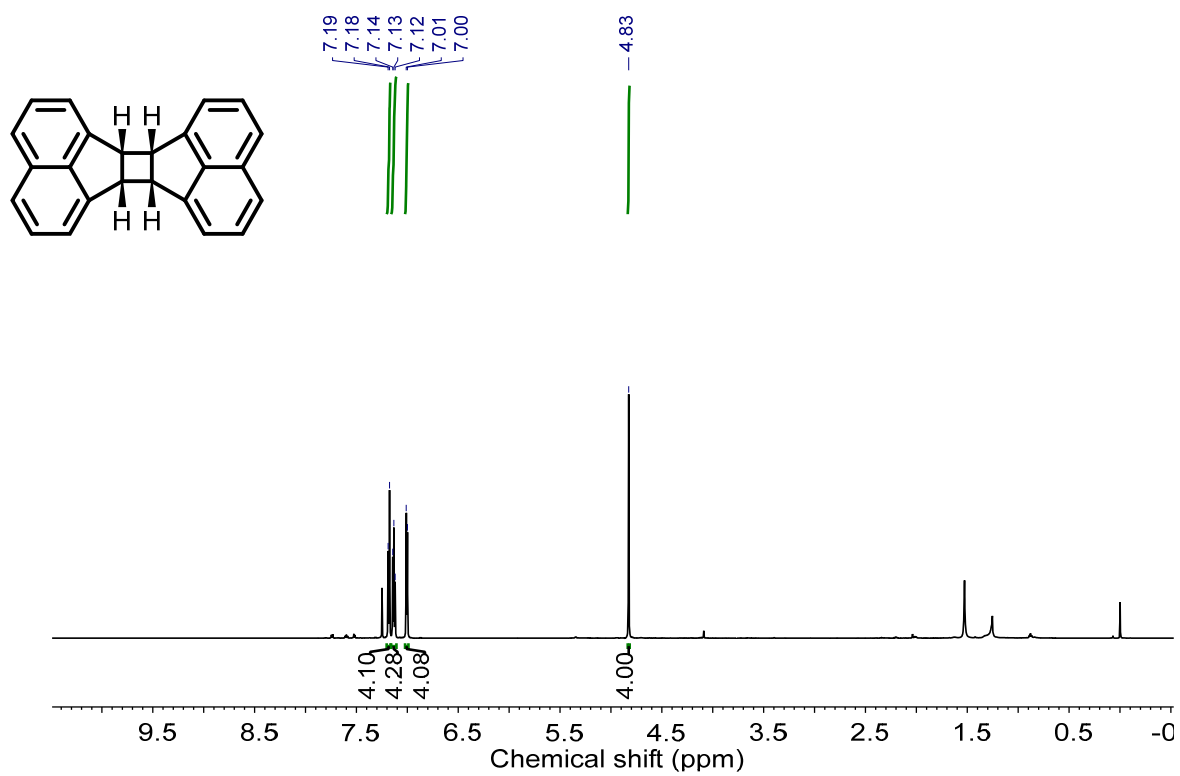

7c,  $^{13}\text{C}$  NMR (151 MHz,  $\text{CDCl}_3$ )

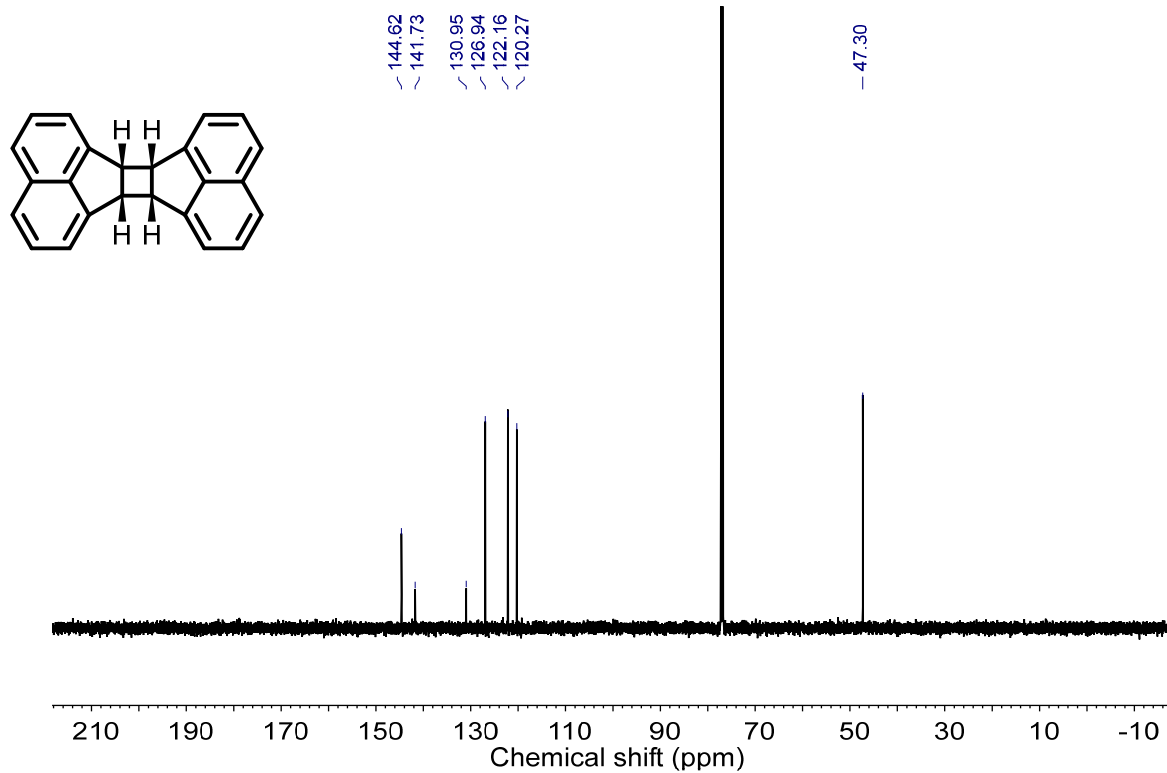

7d, <sup>1</sup>H NMR (600 MHz, CDCl<sub>3</sub>)

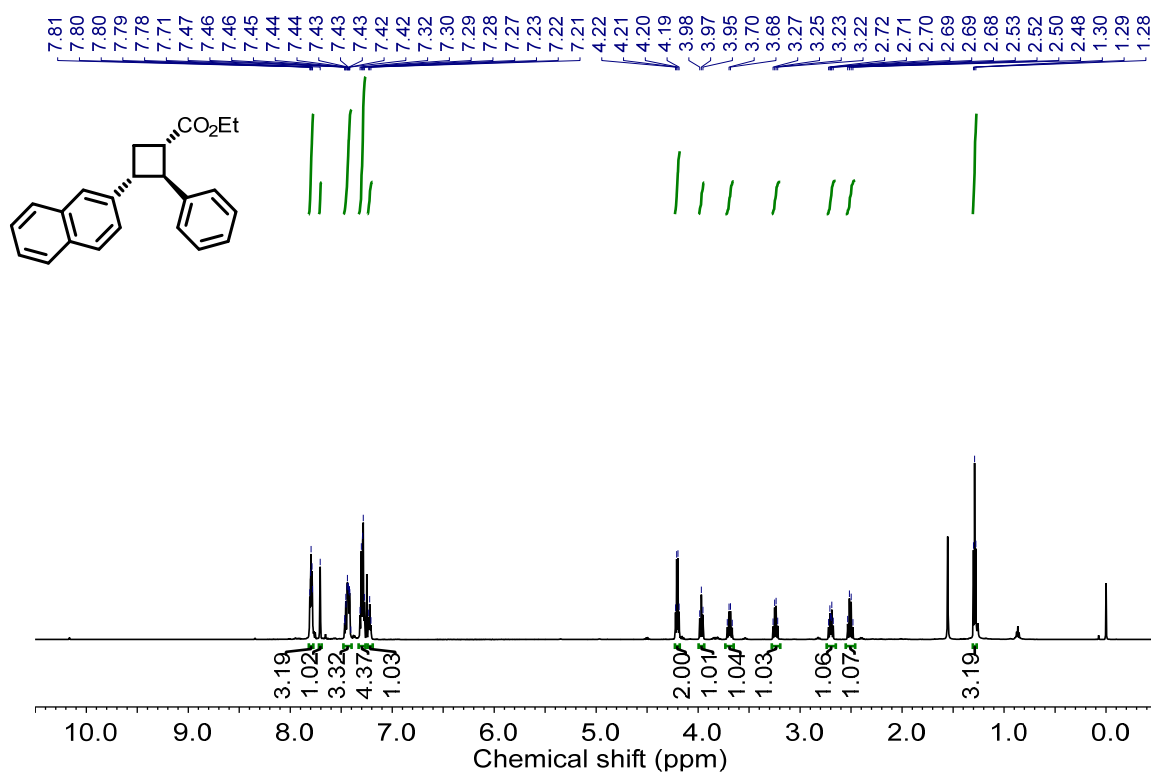

7d, <sup>13</sup>C NMR (151 MHz, CDCl<sub>3</sub>)

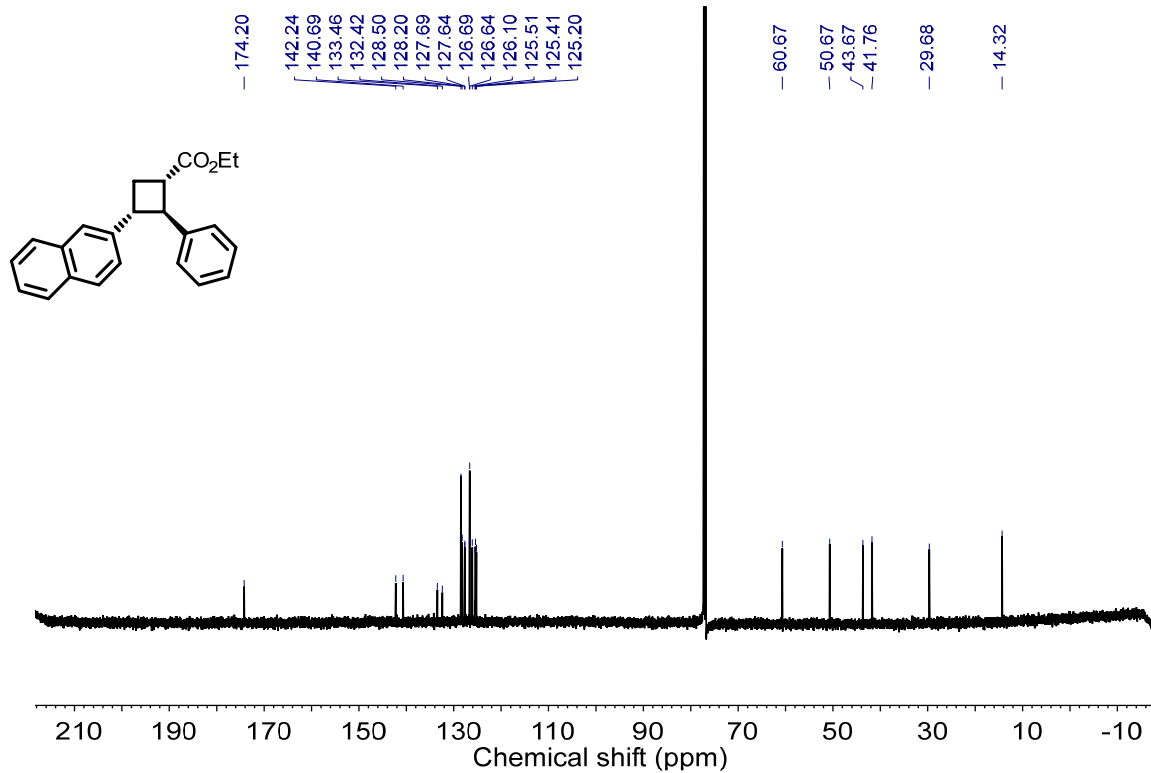

7d, <sup>1</sup>H NMR (600 MHz, CDCl<sub>3</sub>)

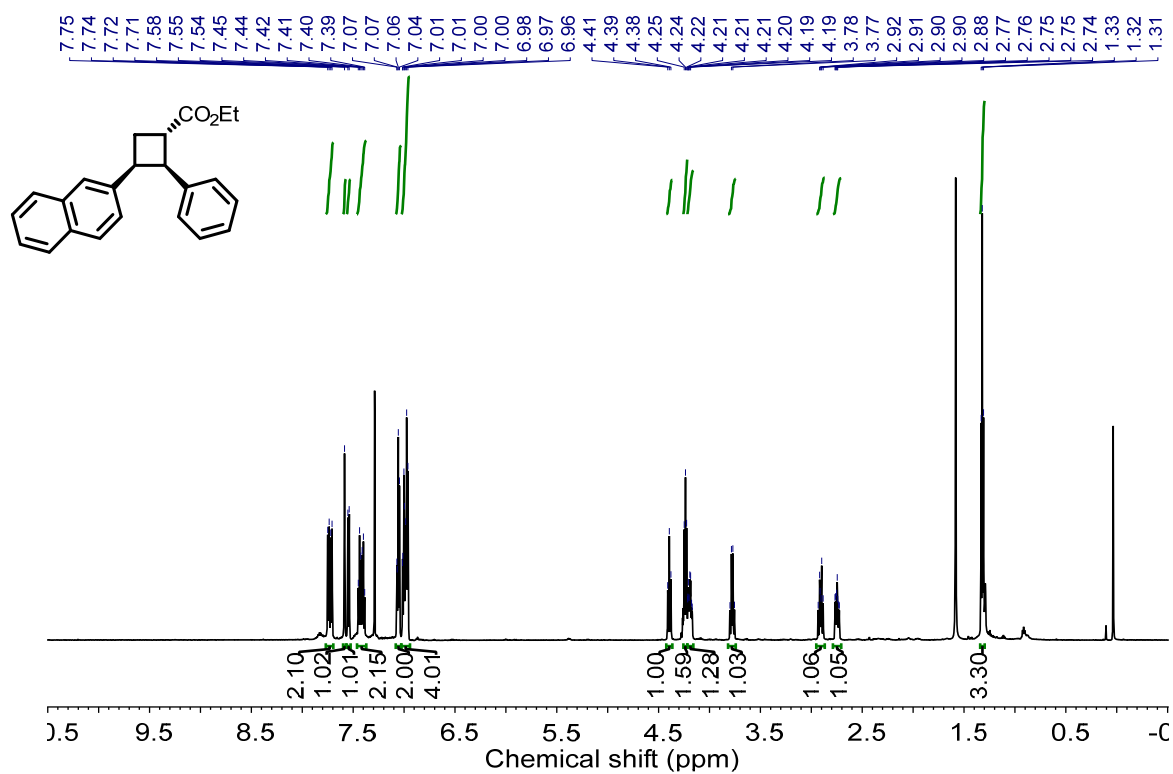

7d, <sup>13</sup>C NMR (151 MHz, CDCl<sub>3</sub>)

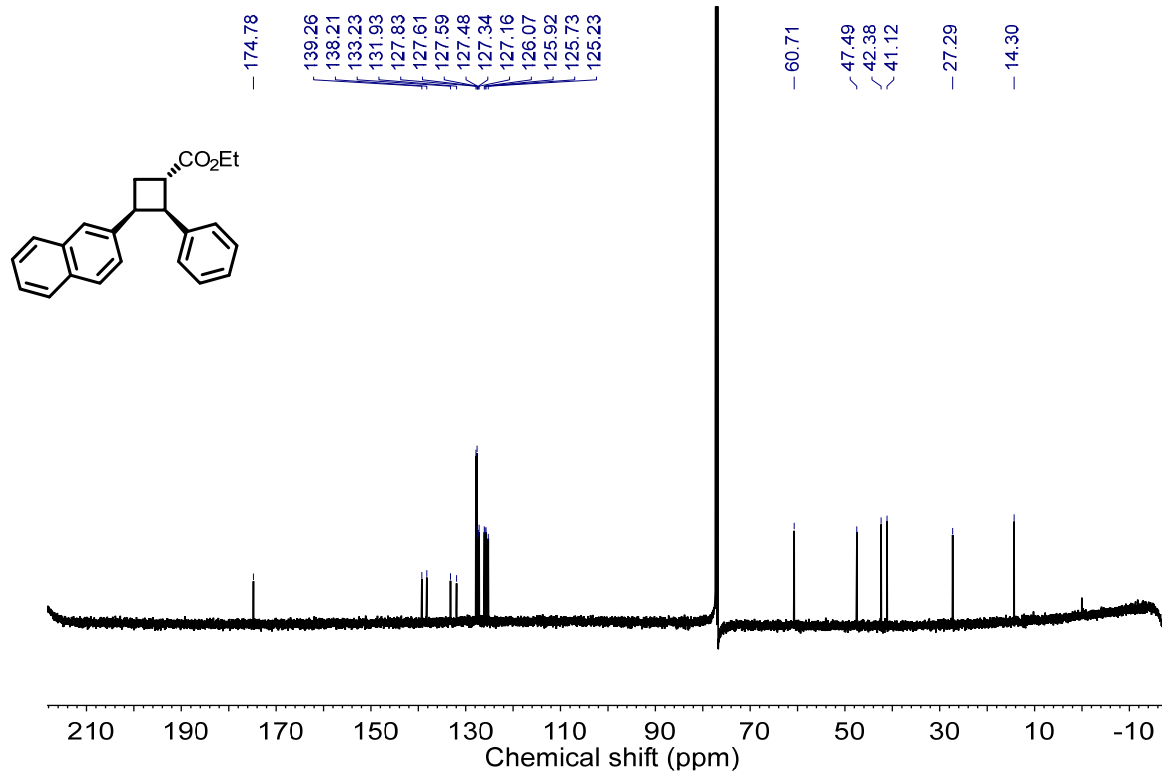

7e, <sup>1</sup>H NMR (400 MHz, CDCl<sub>3</sub>)

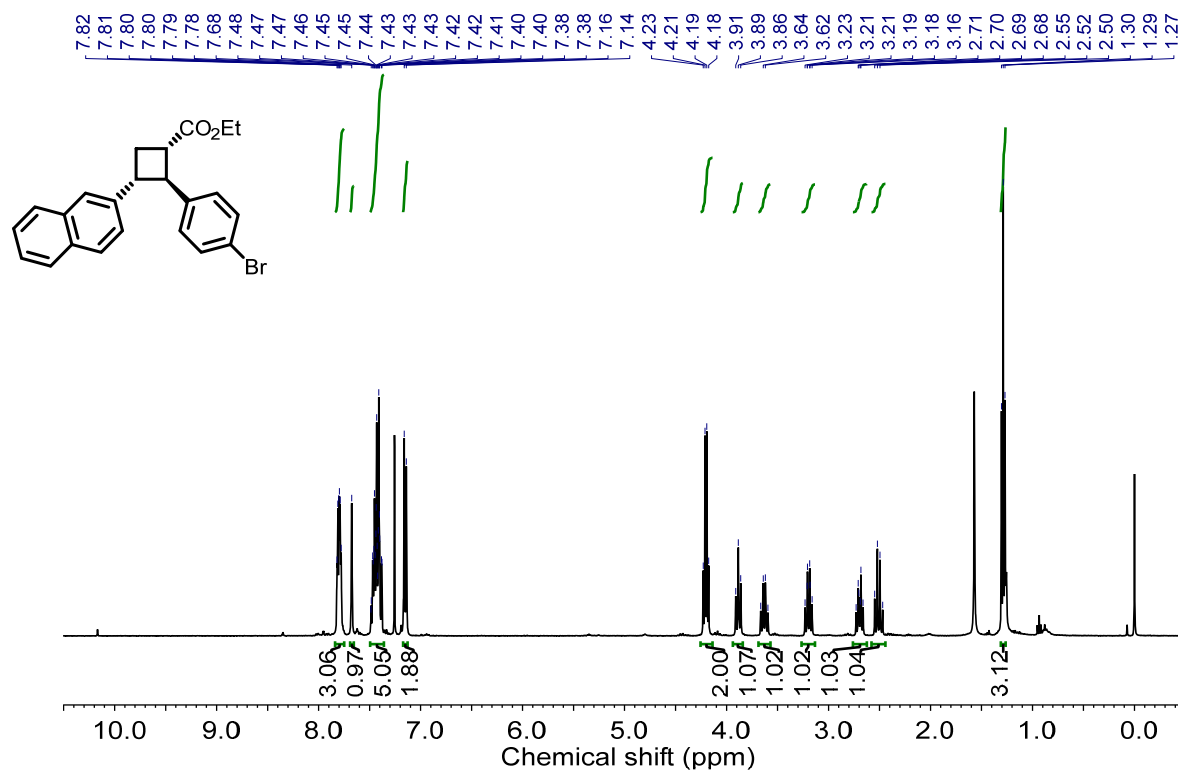

7e, <sup>13</sup>C NMR (151 MHz, CDCl<sub>3</sub>)

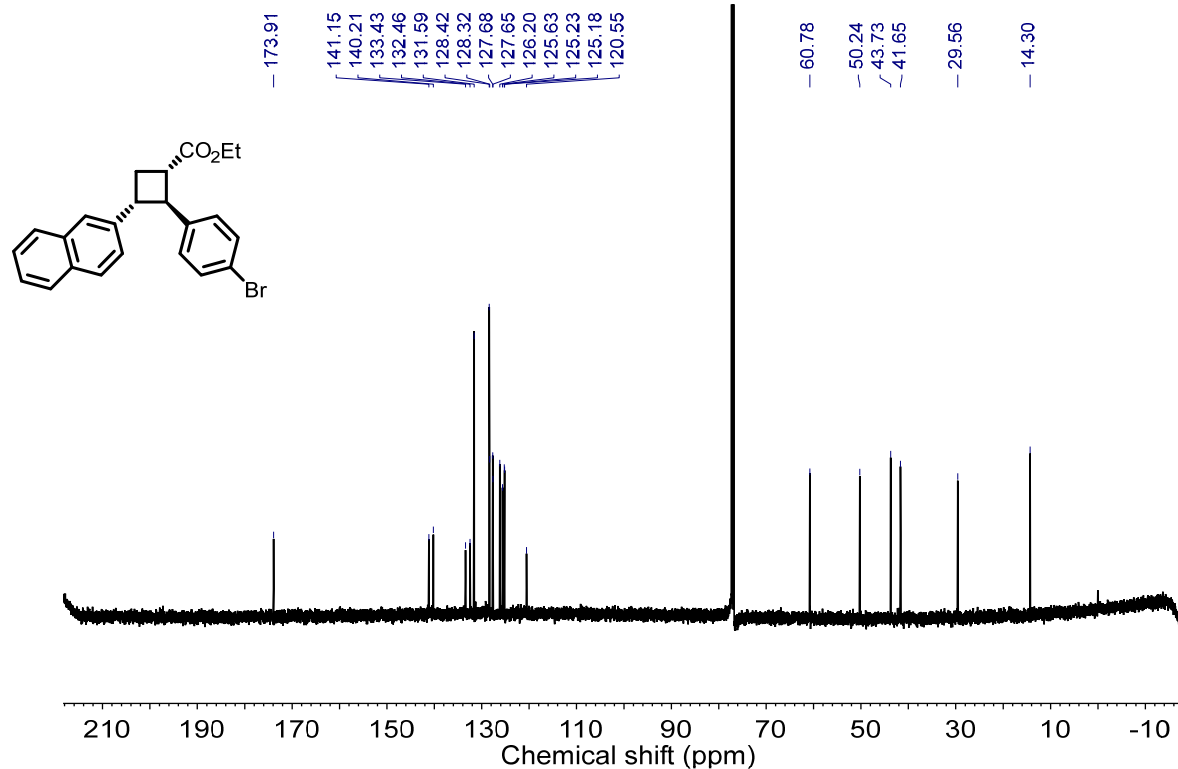



7e, <sup>1</sup>H NMR (400 MHz, CDCl<sub>3</sub>)

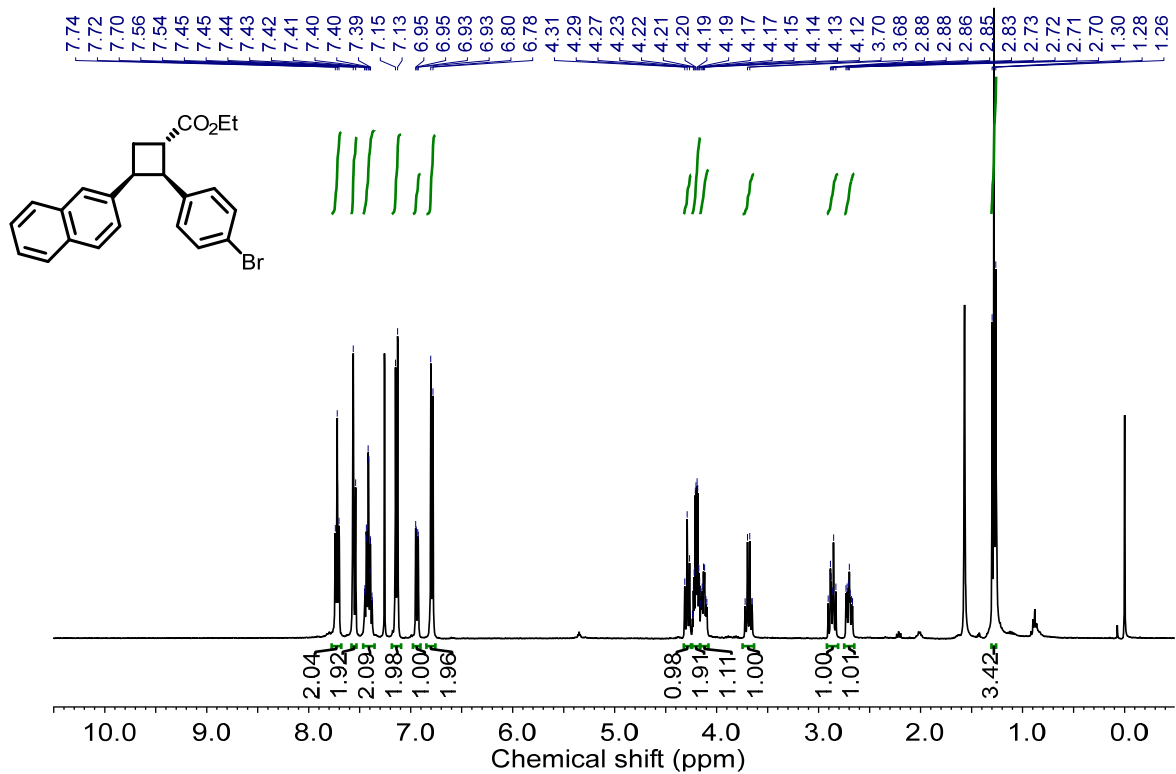

7e, <sup>13</sup>C NMR (151 MHz, CDCl<sub>3</sub>)

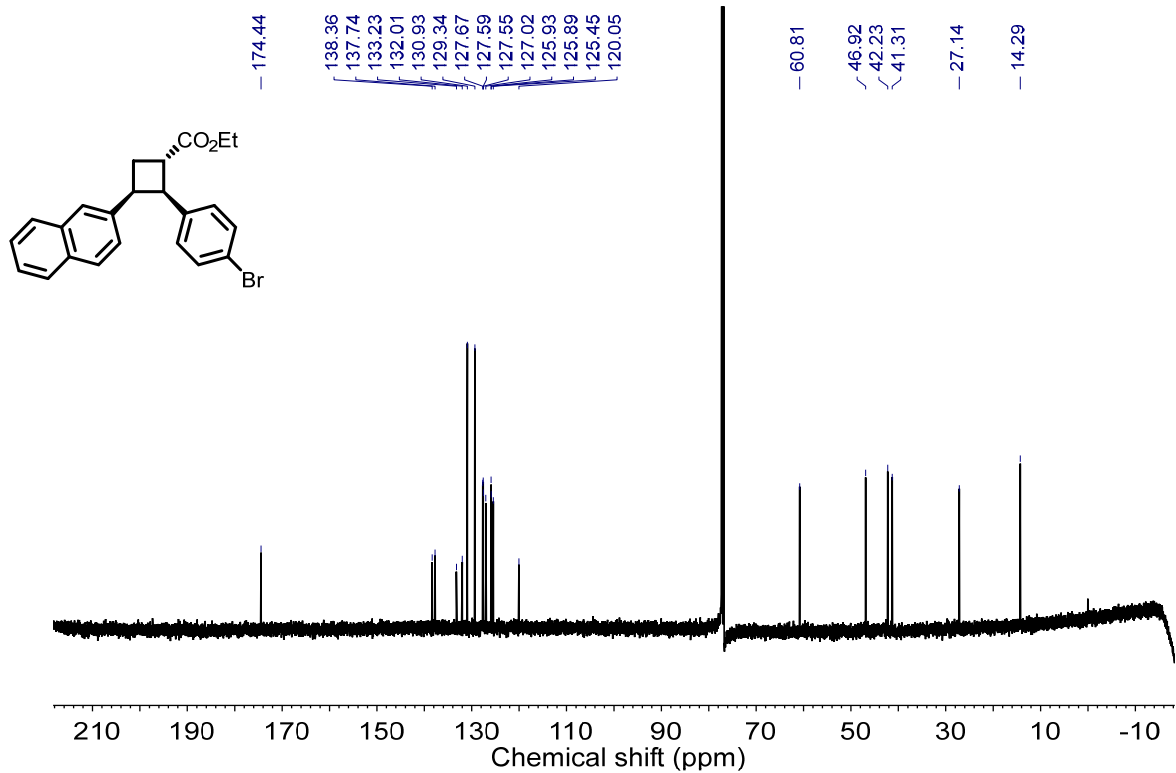

7f, <sup>1</sup>H NMR (600 MHz, CDCl<sub>3</sub>)

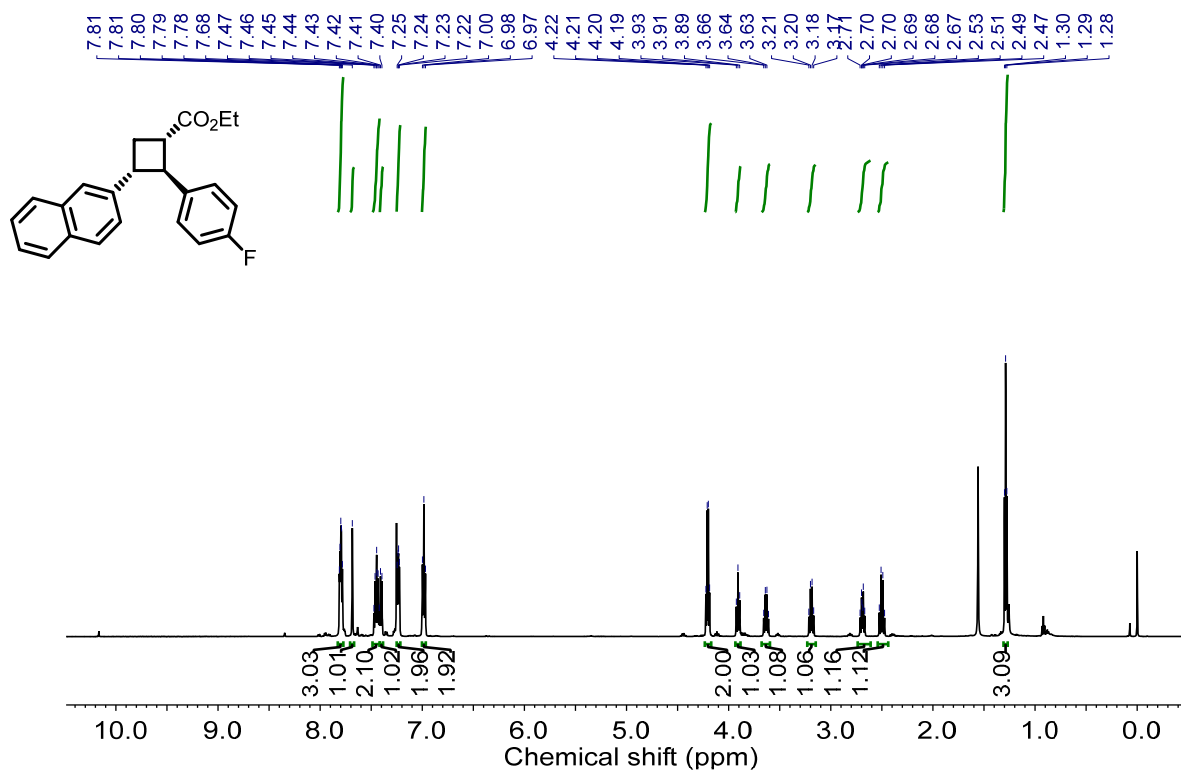

7f, <sup>13</sup>C NMR (151 MHz, CDCl<sub>3</sub>)

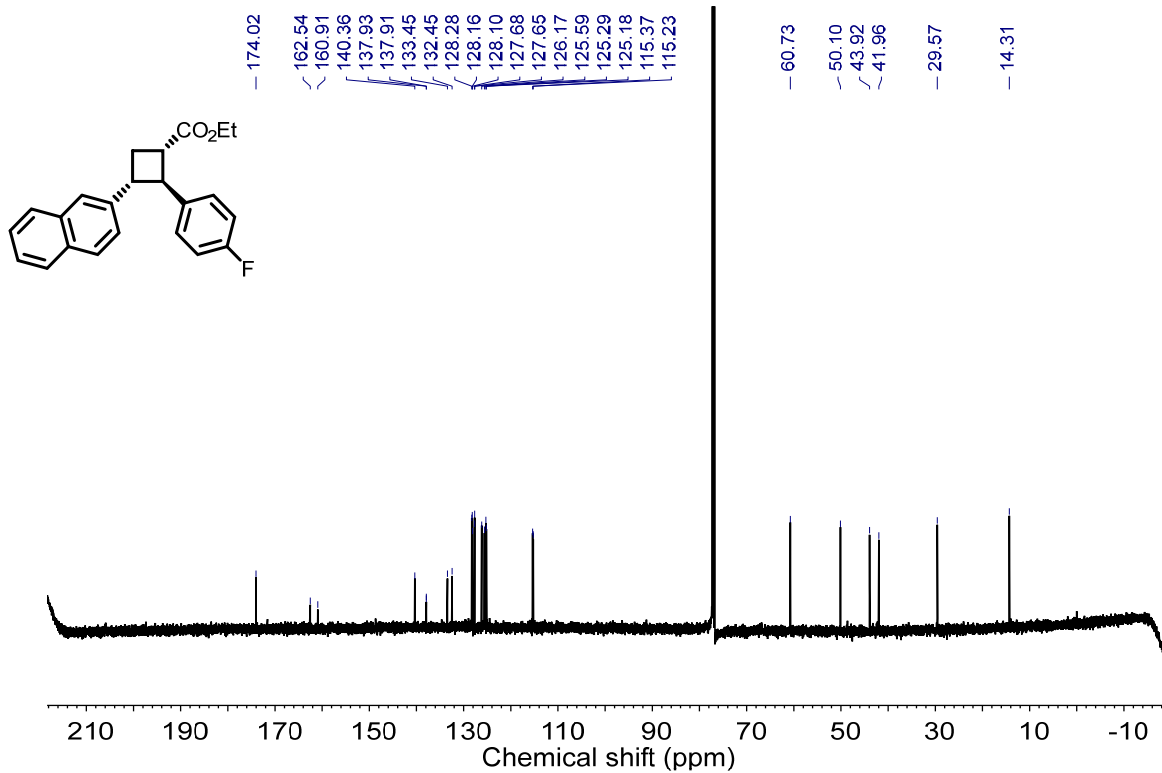

7f, <sup>1</sup>H NMR (600 MHz, CDCl<sub>3</sub>)

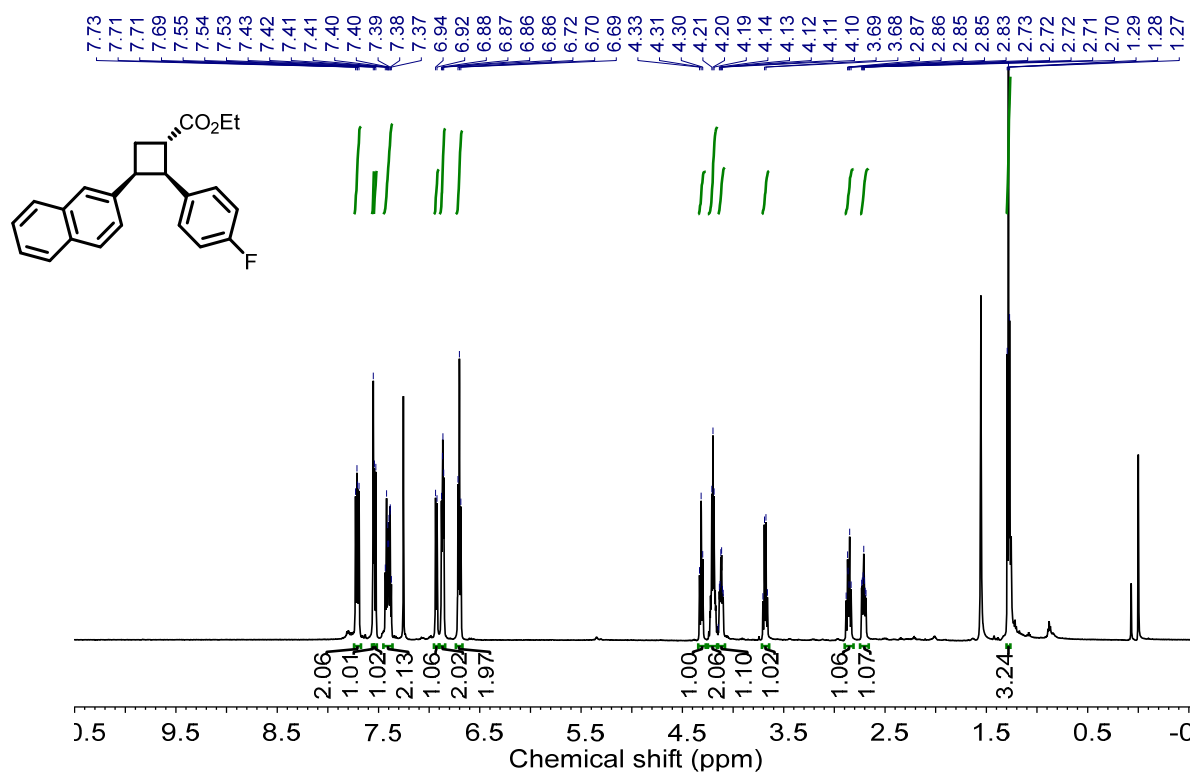

7f, <sup>13</sup>C NMR (151 MHz, CDCl<sub>3</sub>)

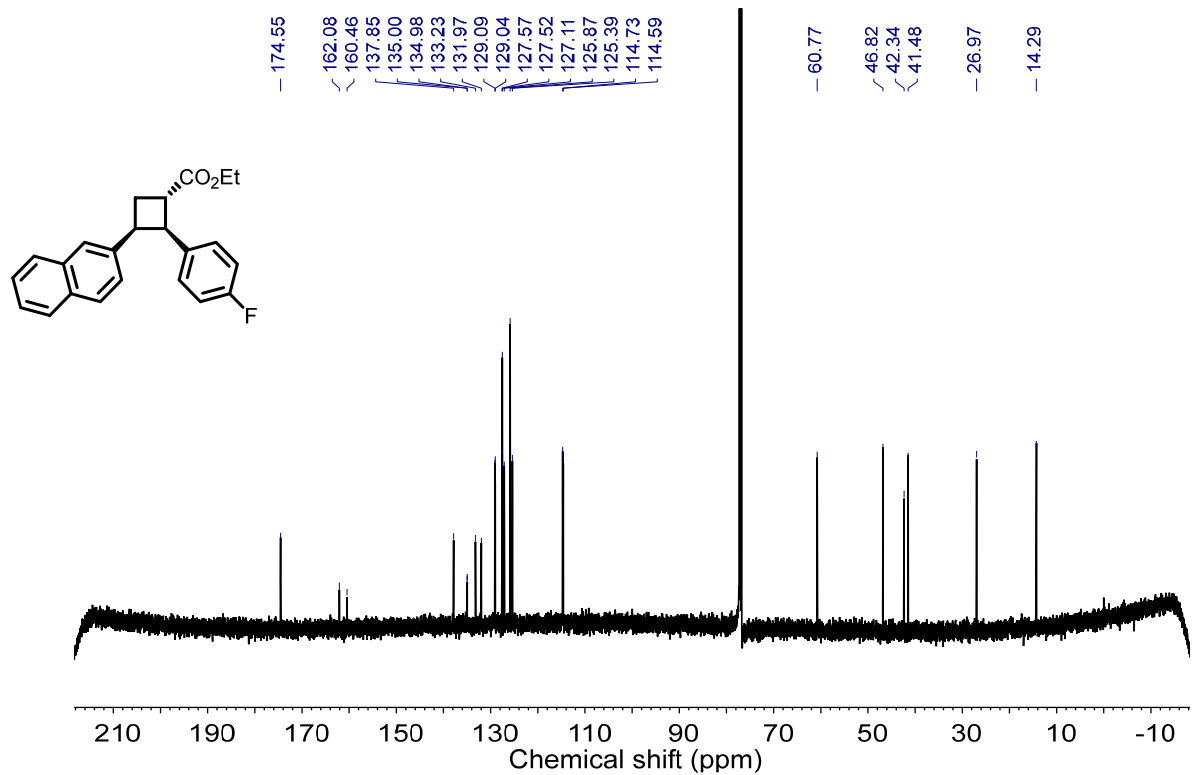

7g, <sup>1</sup>H NMR (600 MHz, CDCl<sub>3</sub>)

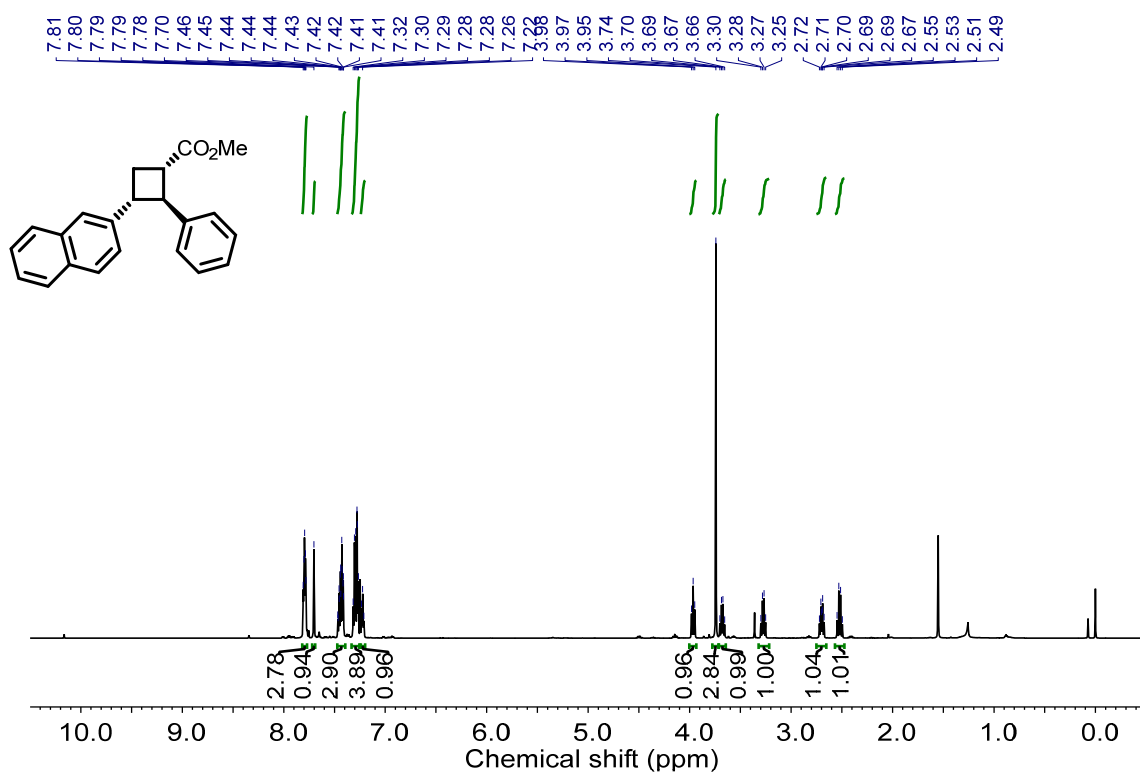

7g, <sup>13</sup>C NMR (151 MHz, CDCl<sub>3</sub>)

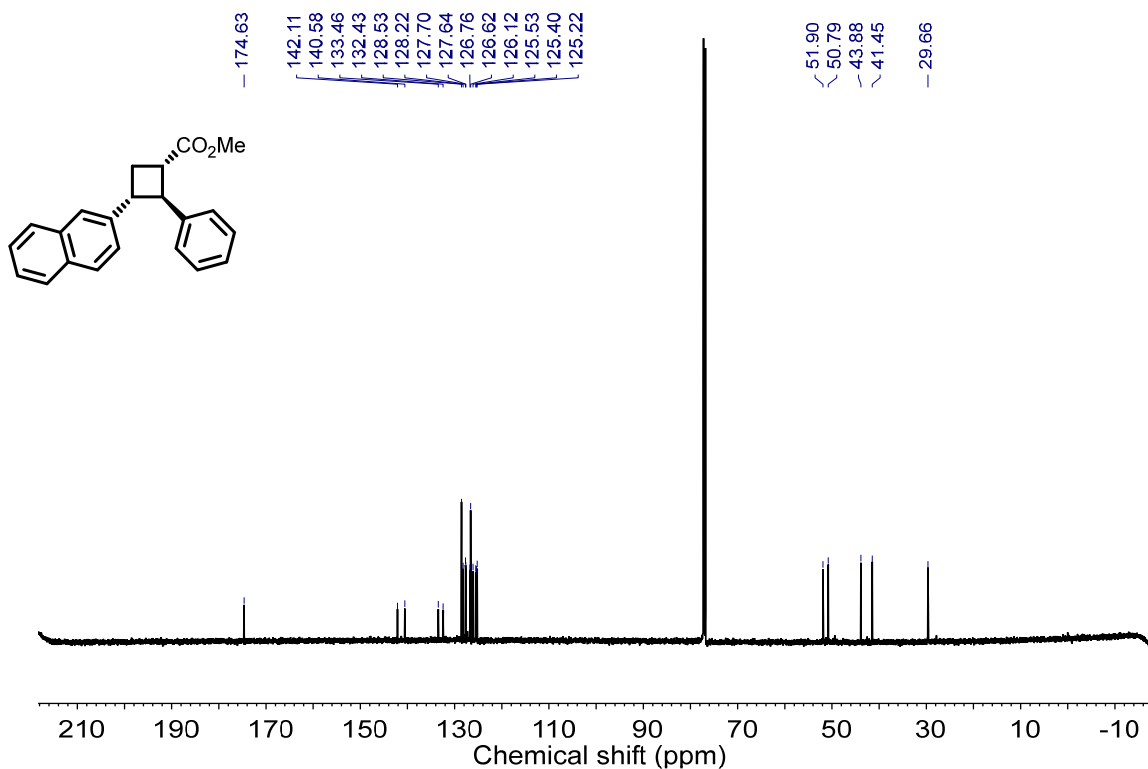

7g, <sup>1</sup>H NMR (600 MHz, CDCl<sub>3</sub>)

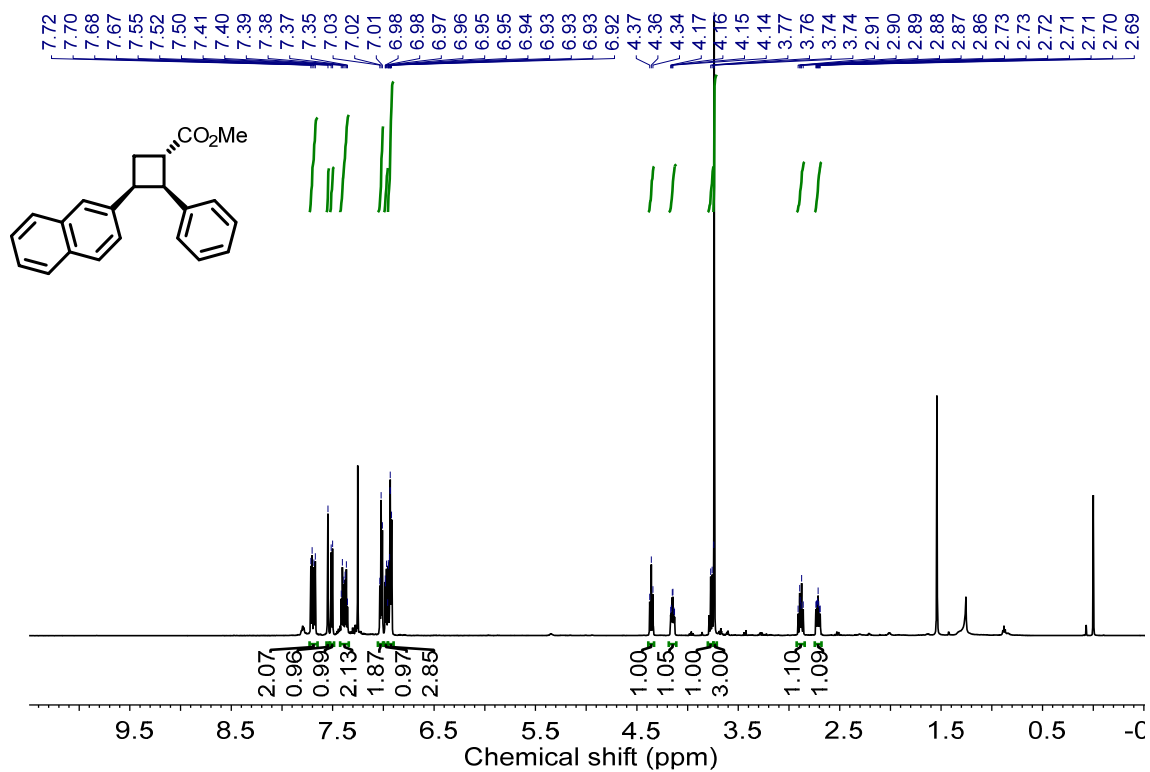

7g, <sup>13</sup>C NMR (151 MHz, CDCl<sub>3</sub>)

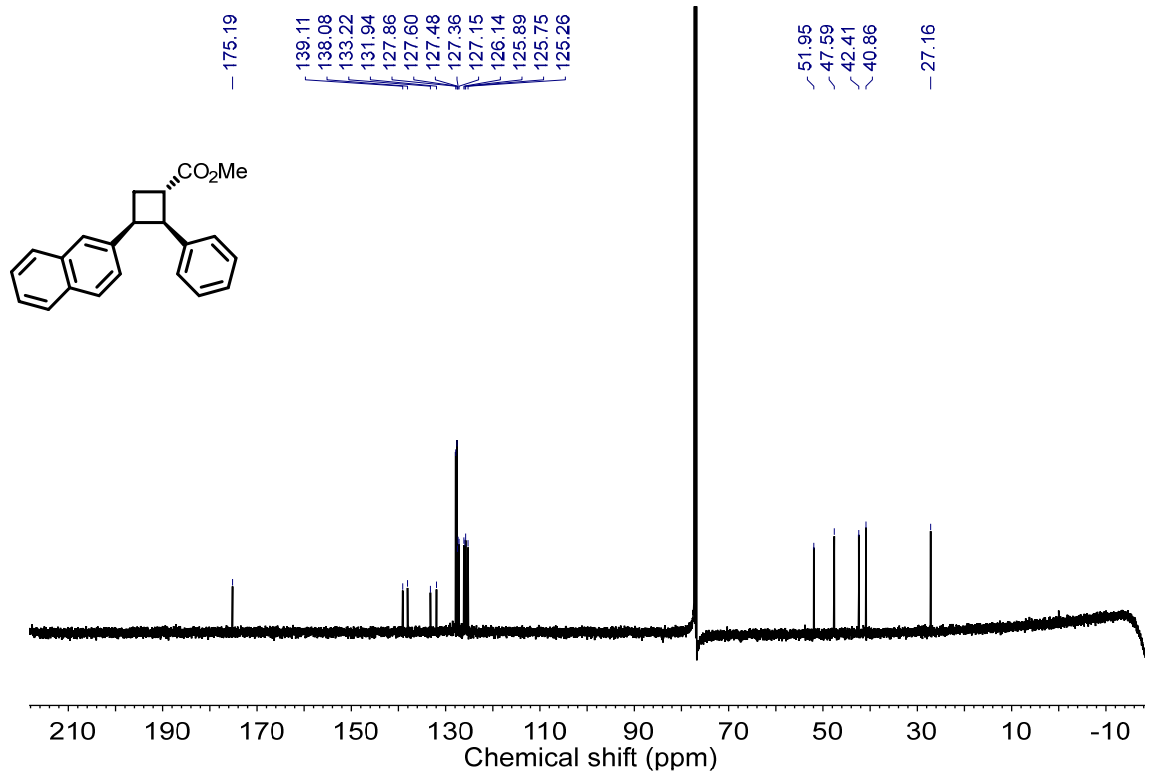

7h, <sup>1</sup>H NMR (400 MHz, CDCl<sub>3</sub>)

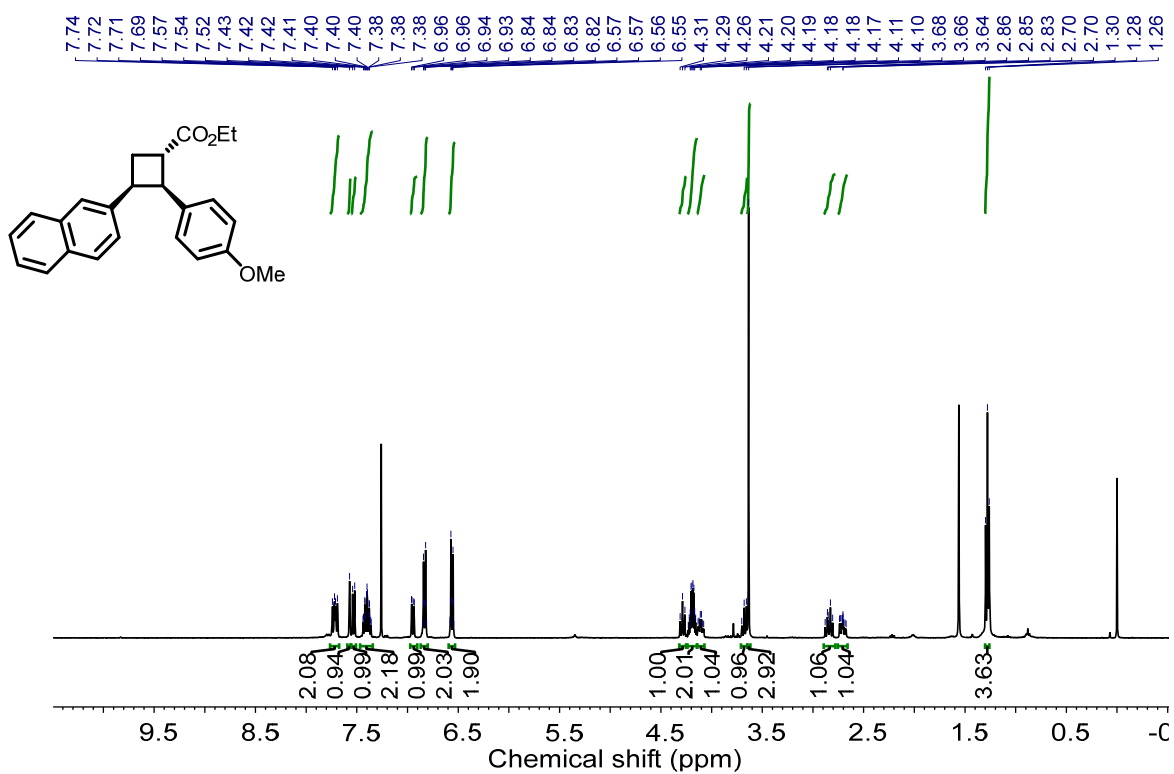

7h, <sup>13</sup>C NMR (151 MHz, CDCl<sub>3</sub>)

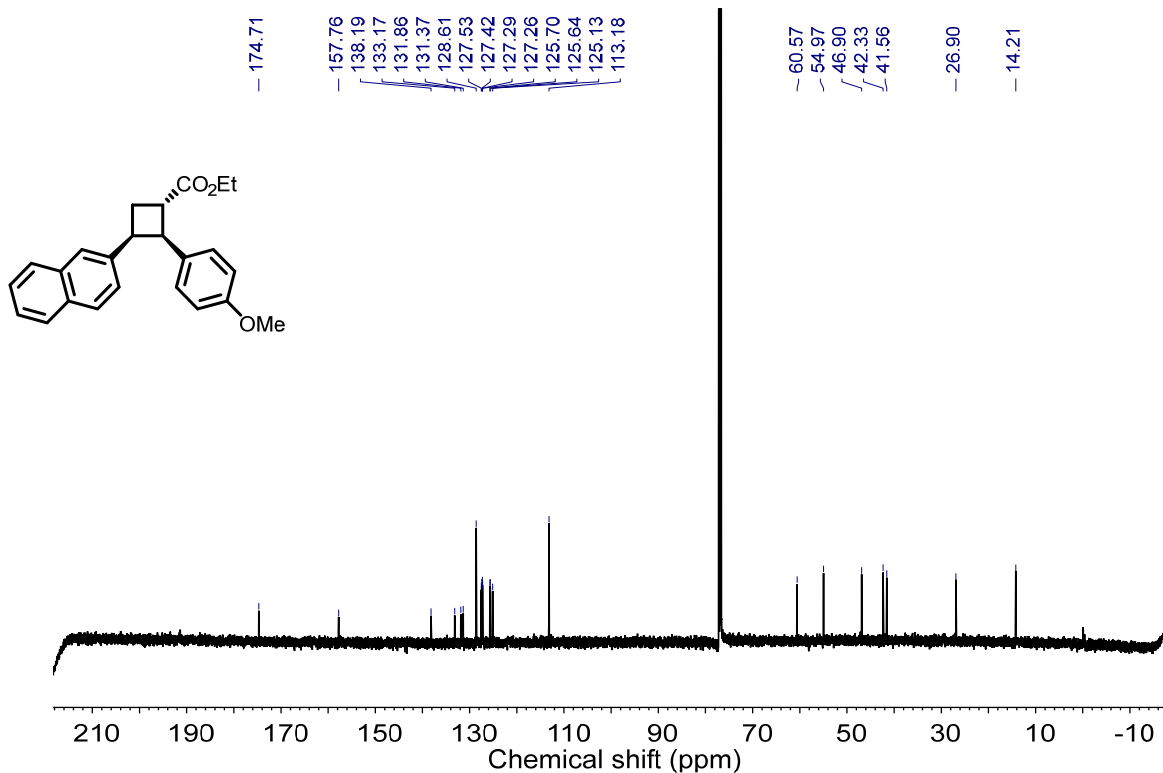

7i, <sup>1</sup>H NMR (400 MHz, CDCl<sub>3</sub>)

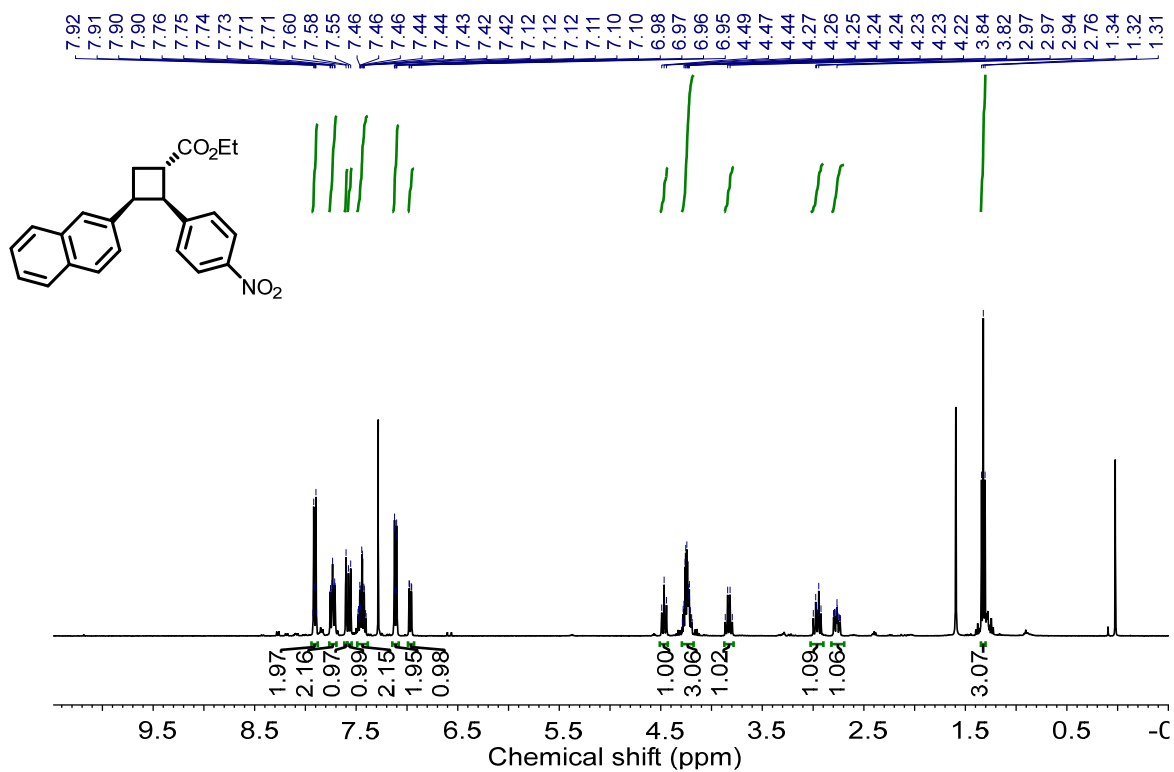

7i, <sup>13</sup>C NMR (151 MHz, CDCl<sub>3</sub>)

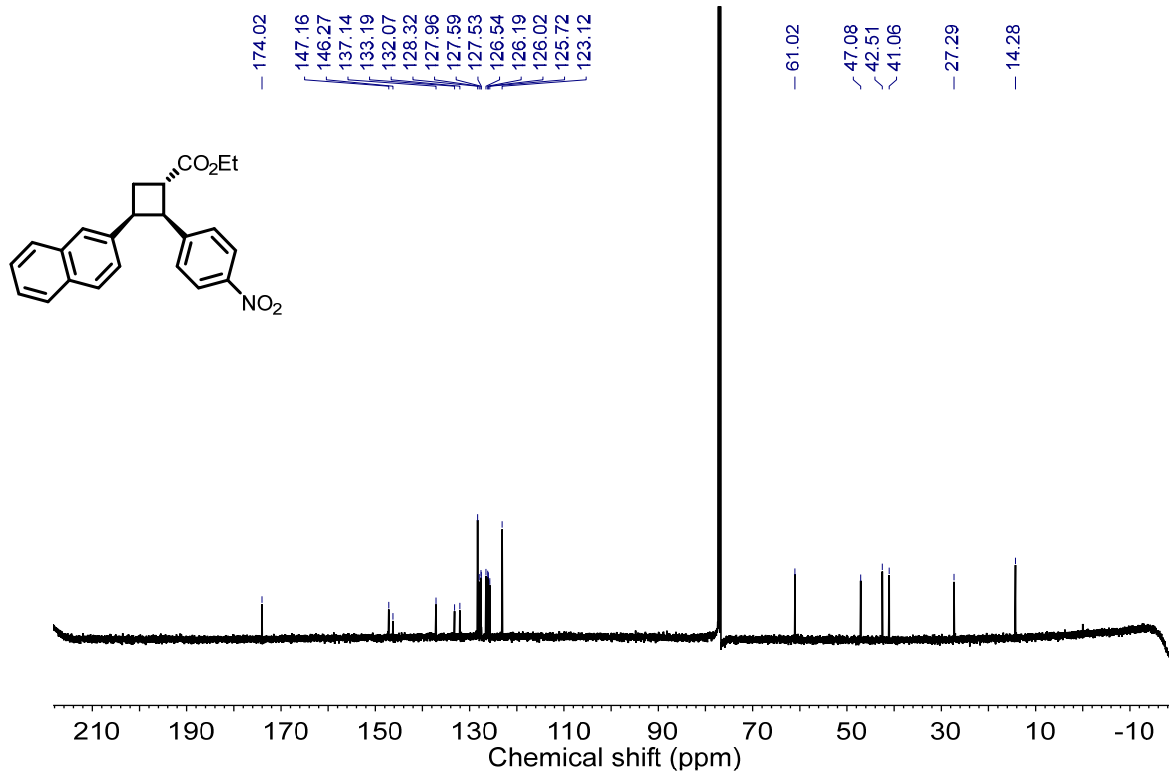

7j, <sup>1</sup>H NMR (500 MHz, Chloroform-*d*)

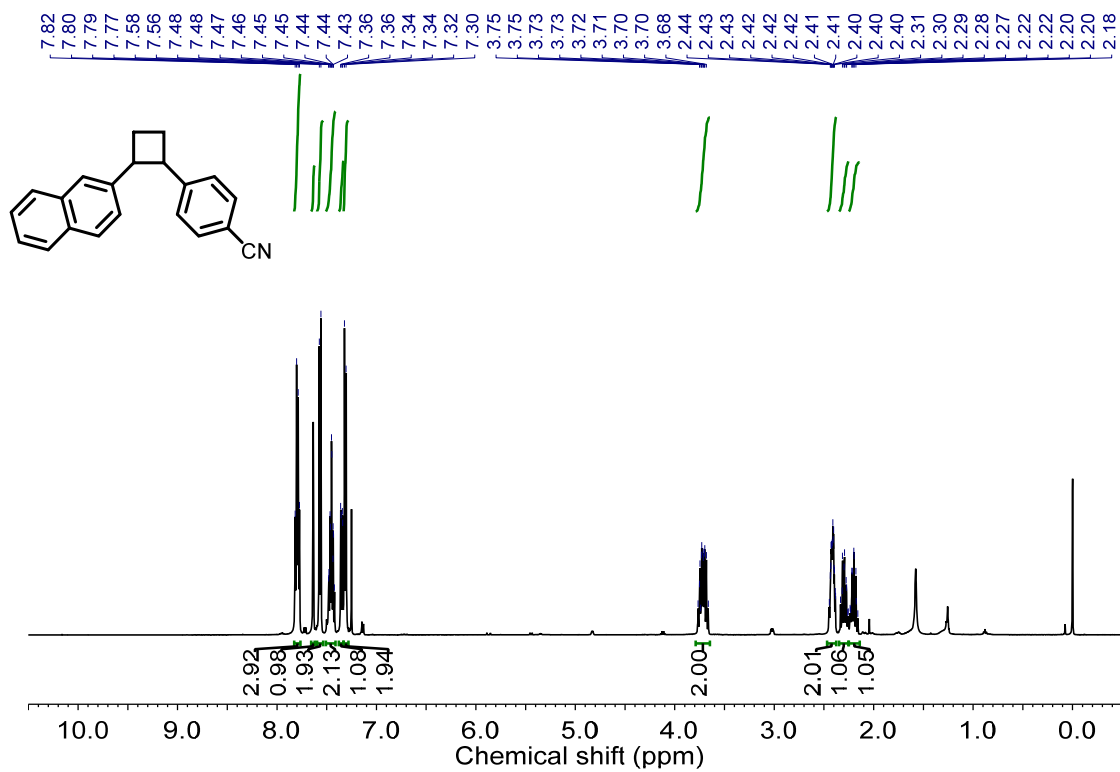

7j, <sup>13</sup>C NMR (126 MHz, Chloroform-*d*)

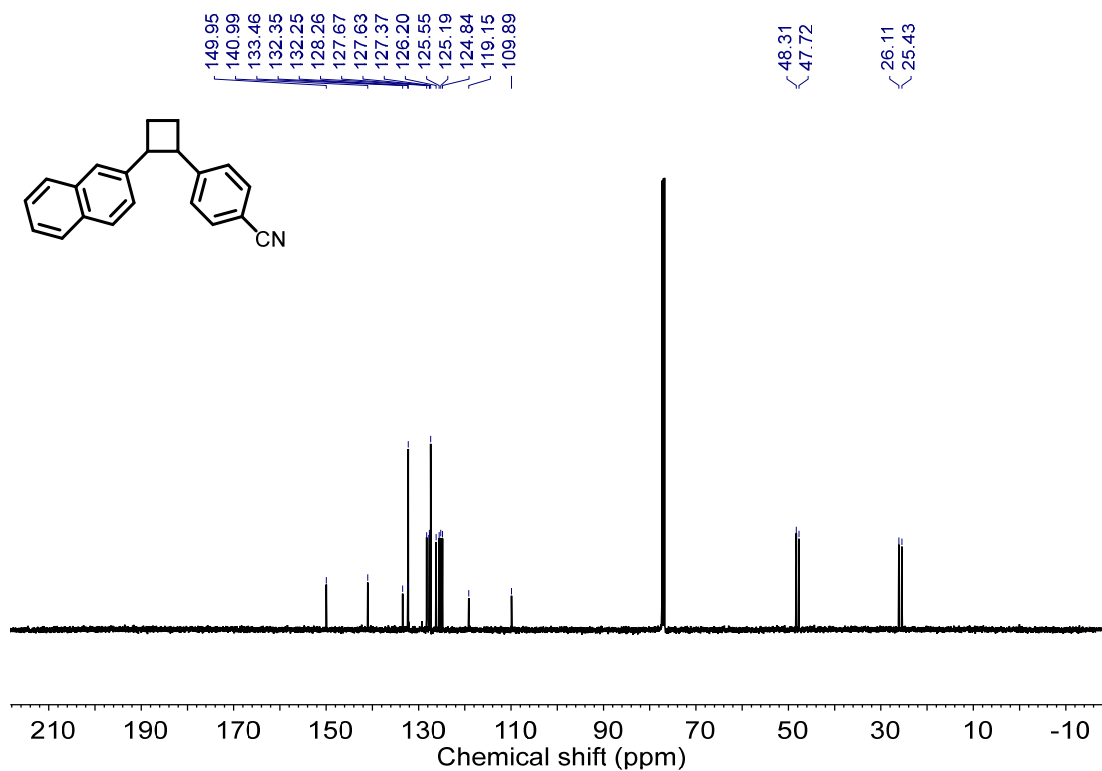



7k, <sup>1</sup>H NMR (500 MHz, Chloroform-*d*)

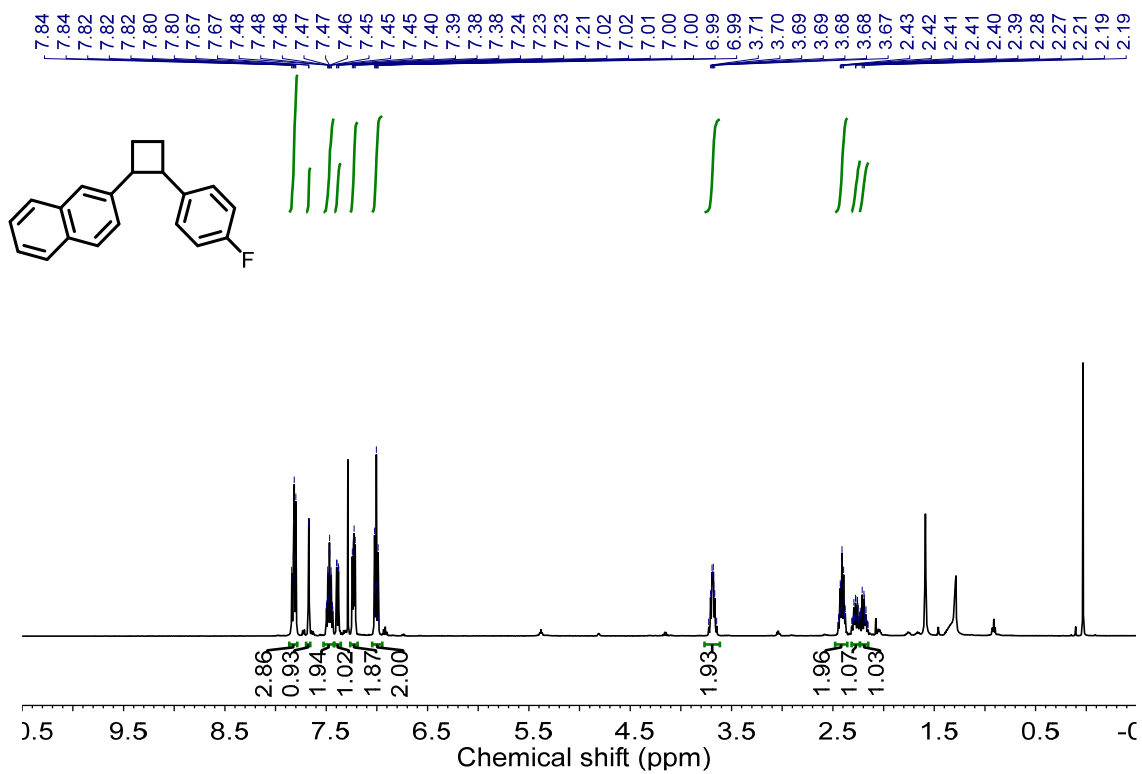

7k, <sup>13</sup>C NMR (126 MHz, Chloroform-*d*)

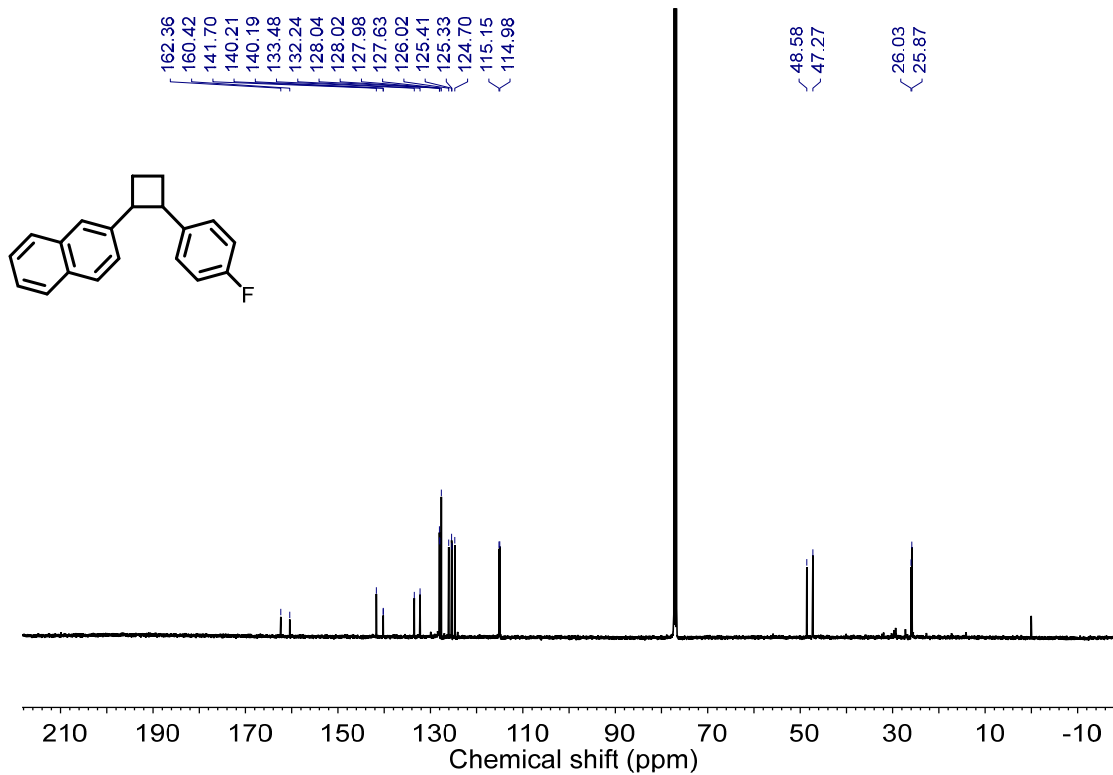

7l, <sup>1</sup>H NMR (500 MHz, Chloroform-*d*)

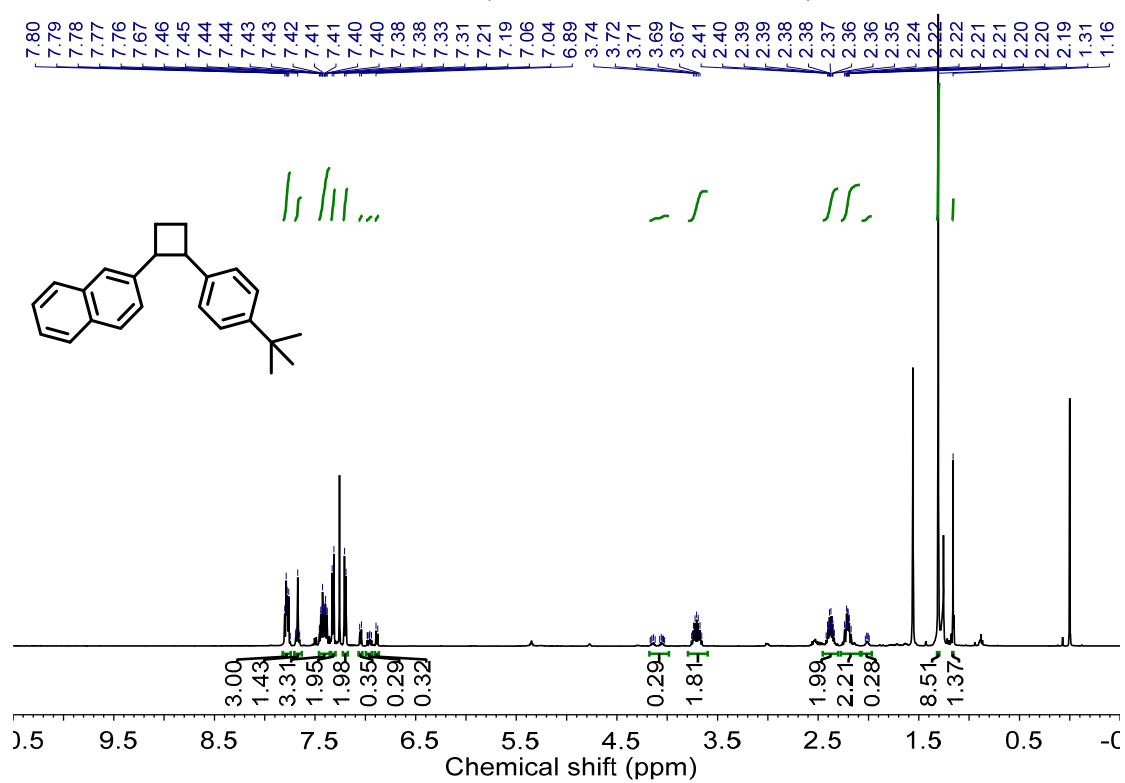

7l, <sup>13</sup>C NMR (126 MHz, Chloroform-*d*)

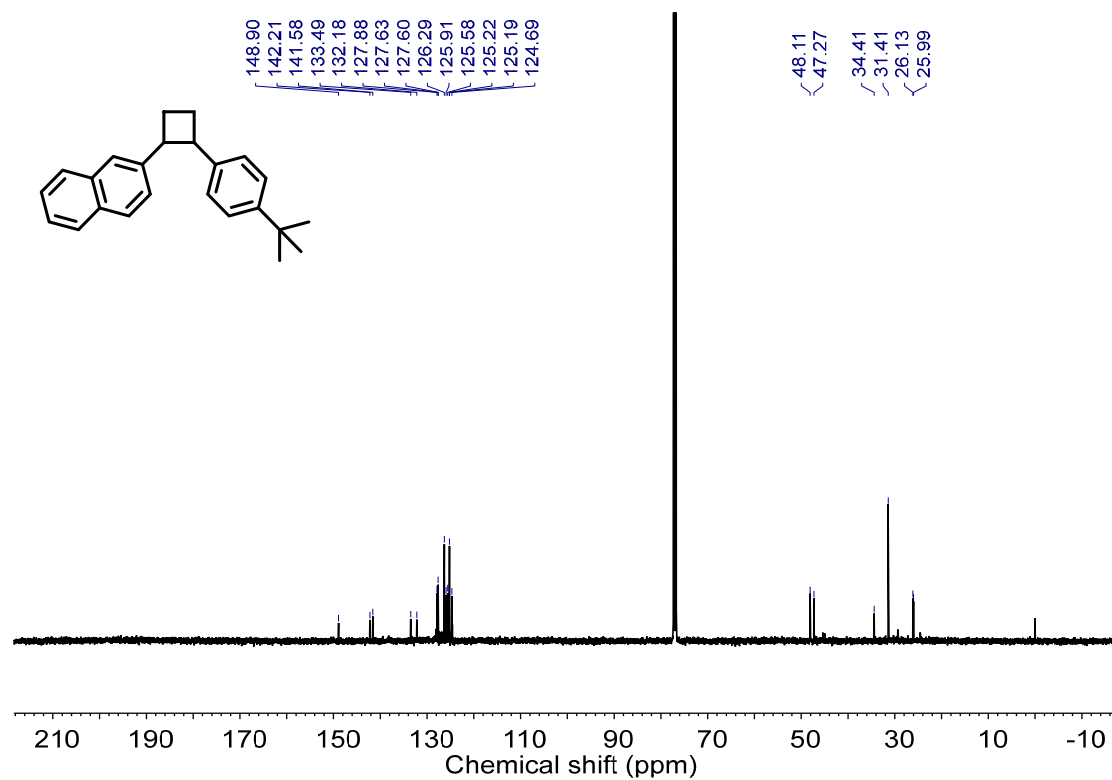

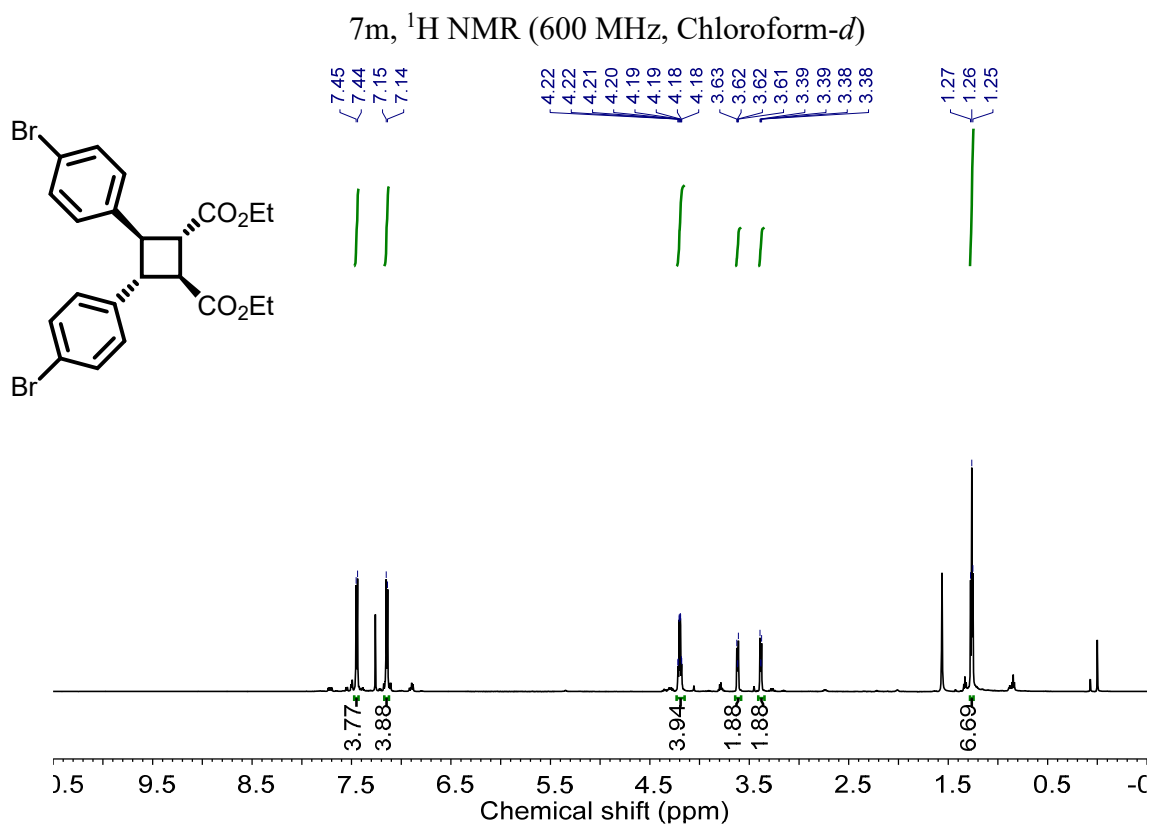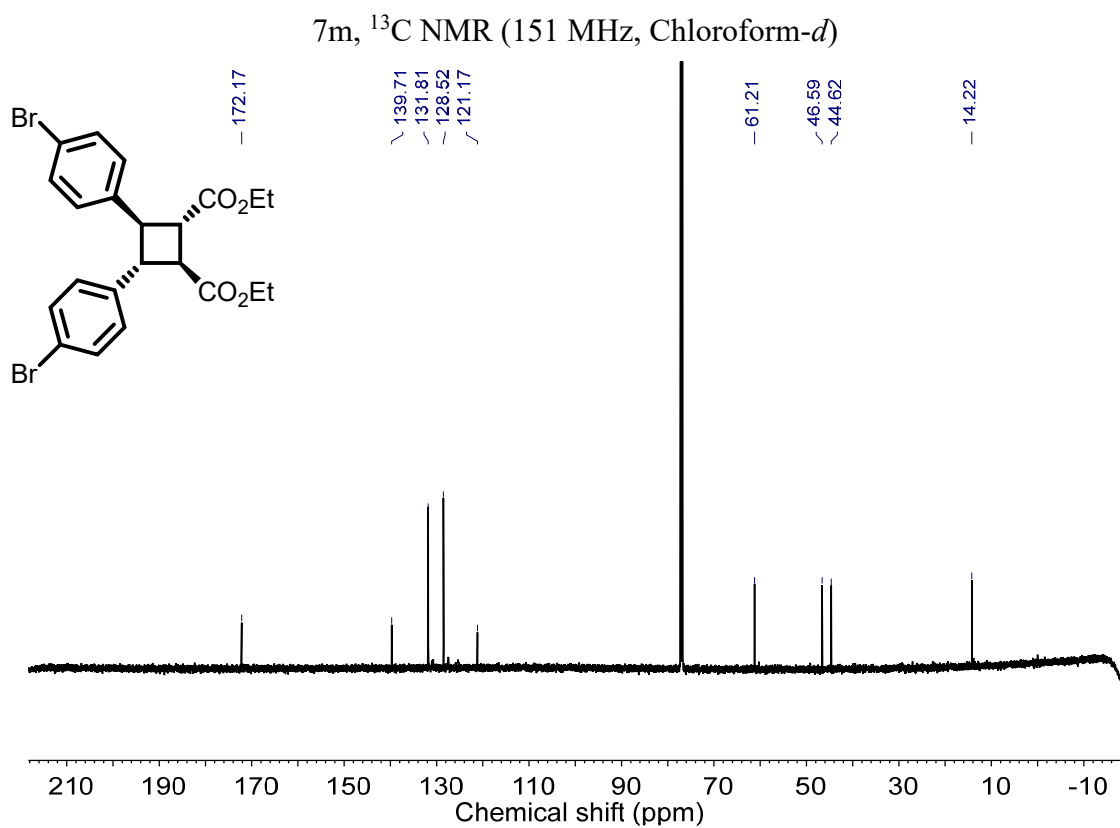

7n, <sup>1</sup>H NMR (600 MHz, Chloroform-*d*)

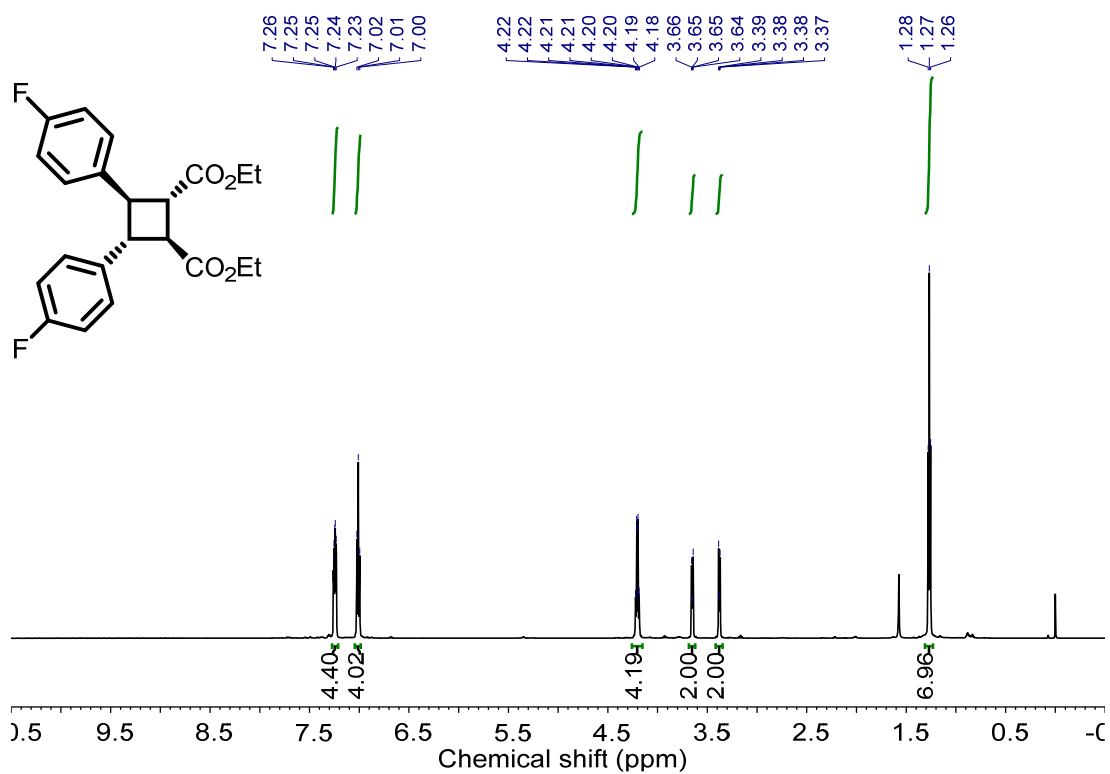

7n, <sup>13</sup>C NMR (151 MHz, Chloroform-*d*)

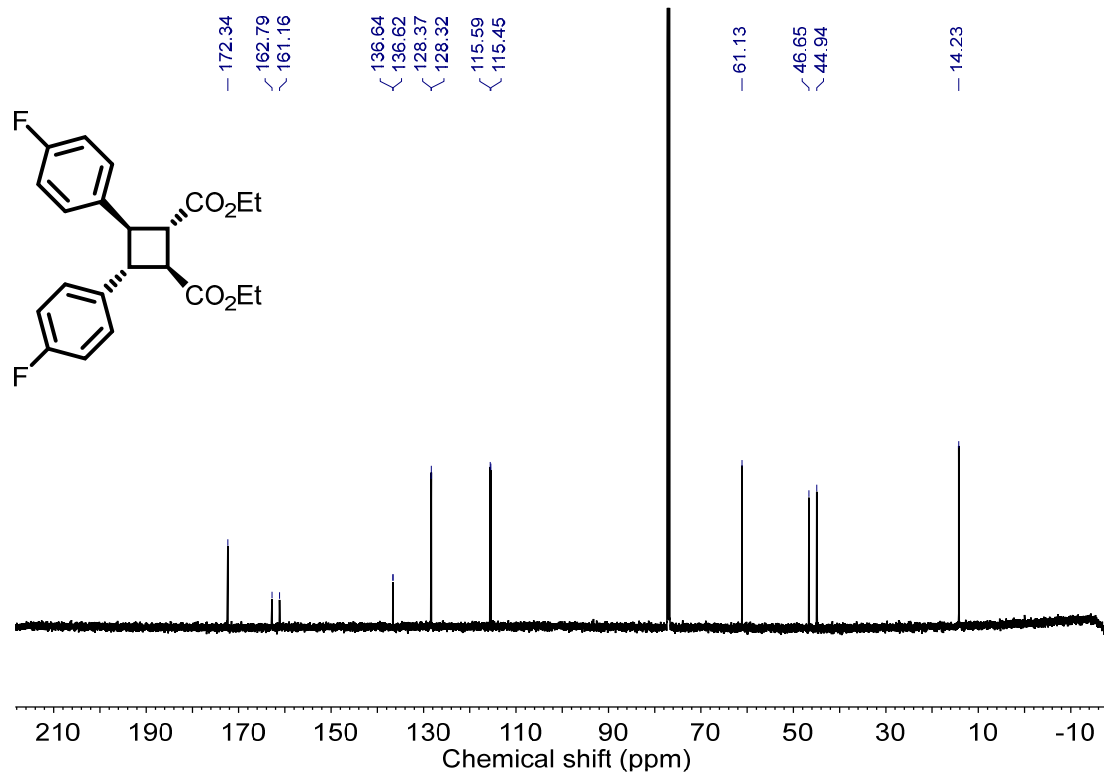

7o, <sup>1</sup>H NMR (500 MHz, Chloroform-*d*)

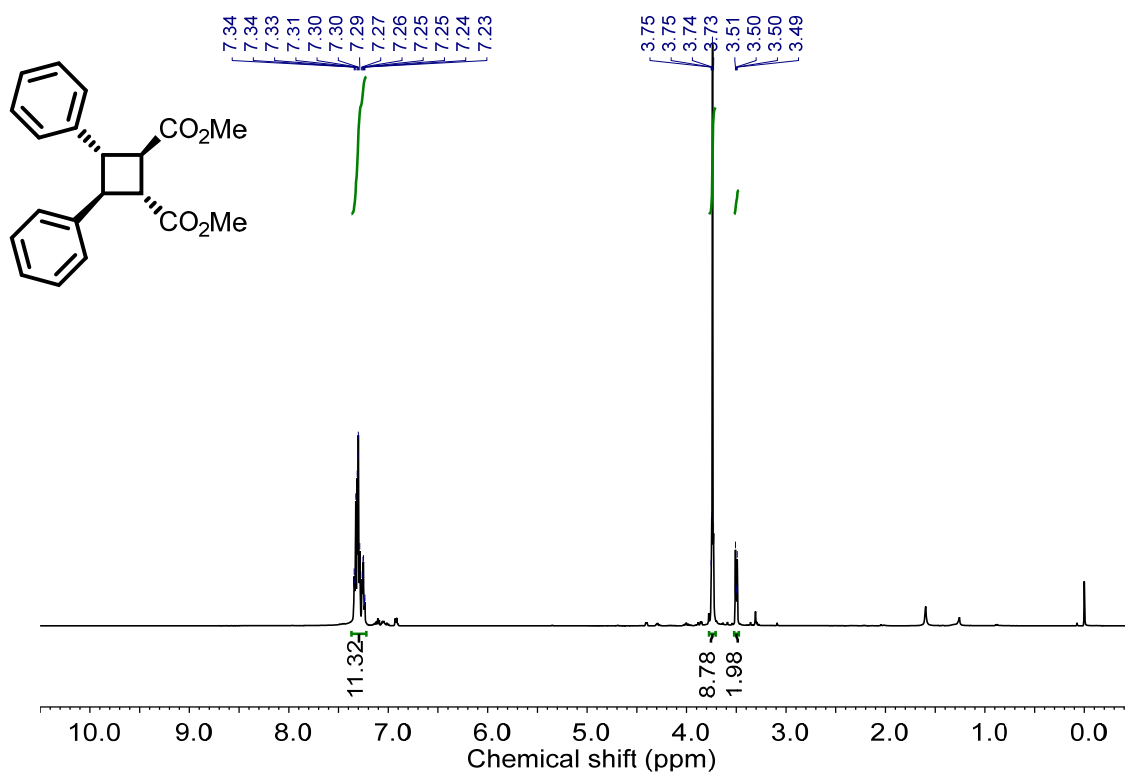

7o, <sup>13</sup>C NMR (126 MHz, Chloroform-*d*)

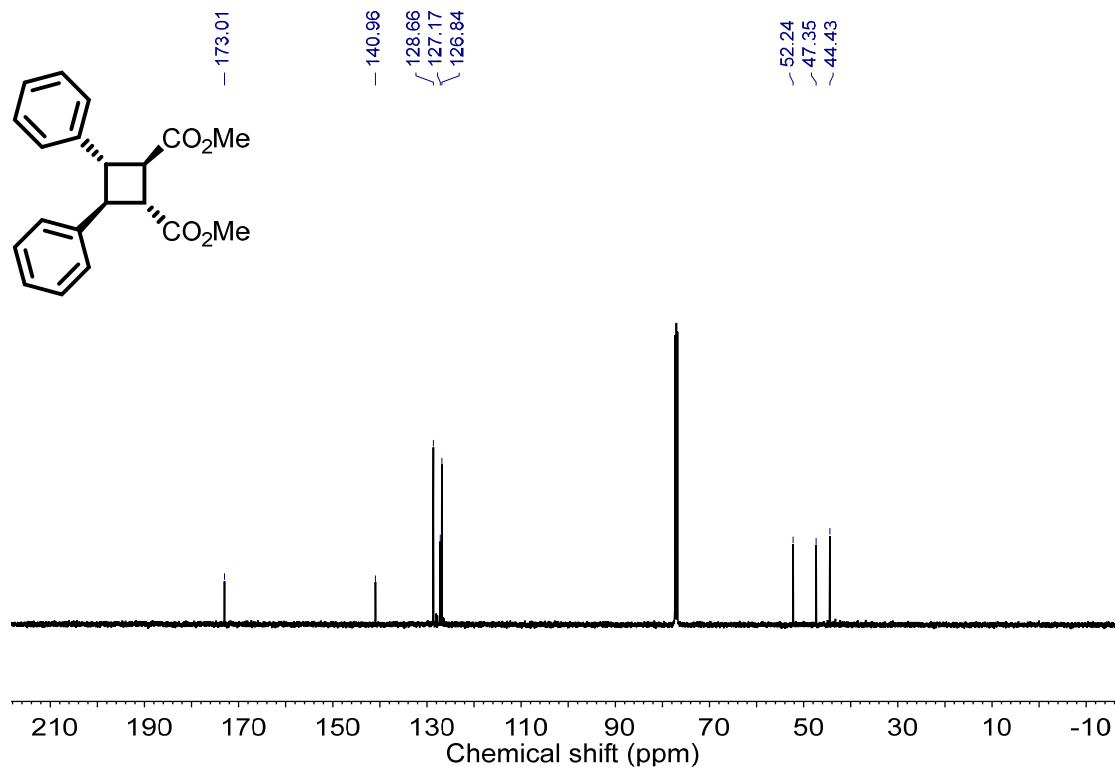

7p,  $^1\text{H}$  NMR (600 MHz, Chloroform-*d*)

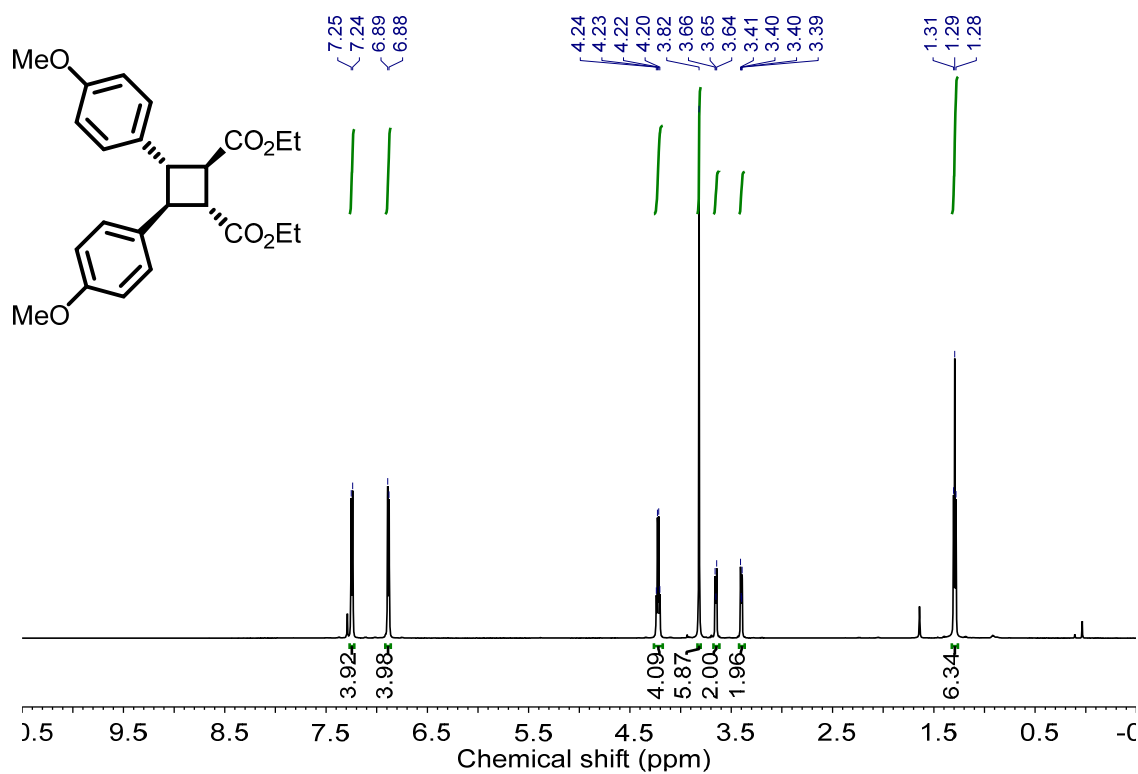

7p,  $^{13}\text{C}$  NMR (151 MHz, Chloroform-*d*)

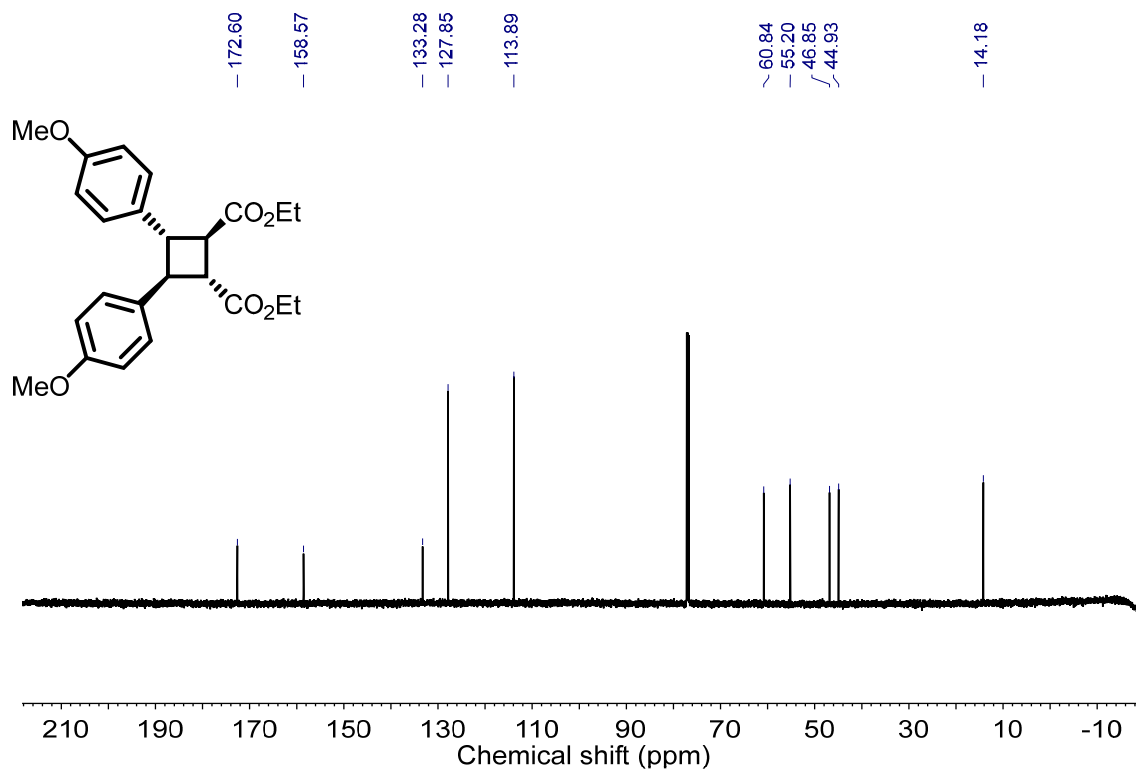

7q, <sup>1</sup>H NMR (400 MHz, Chloroform-*d*)

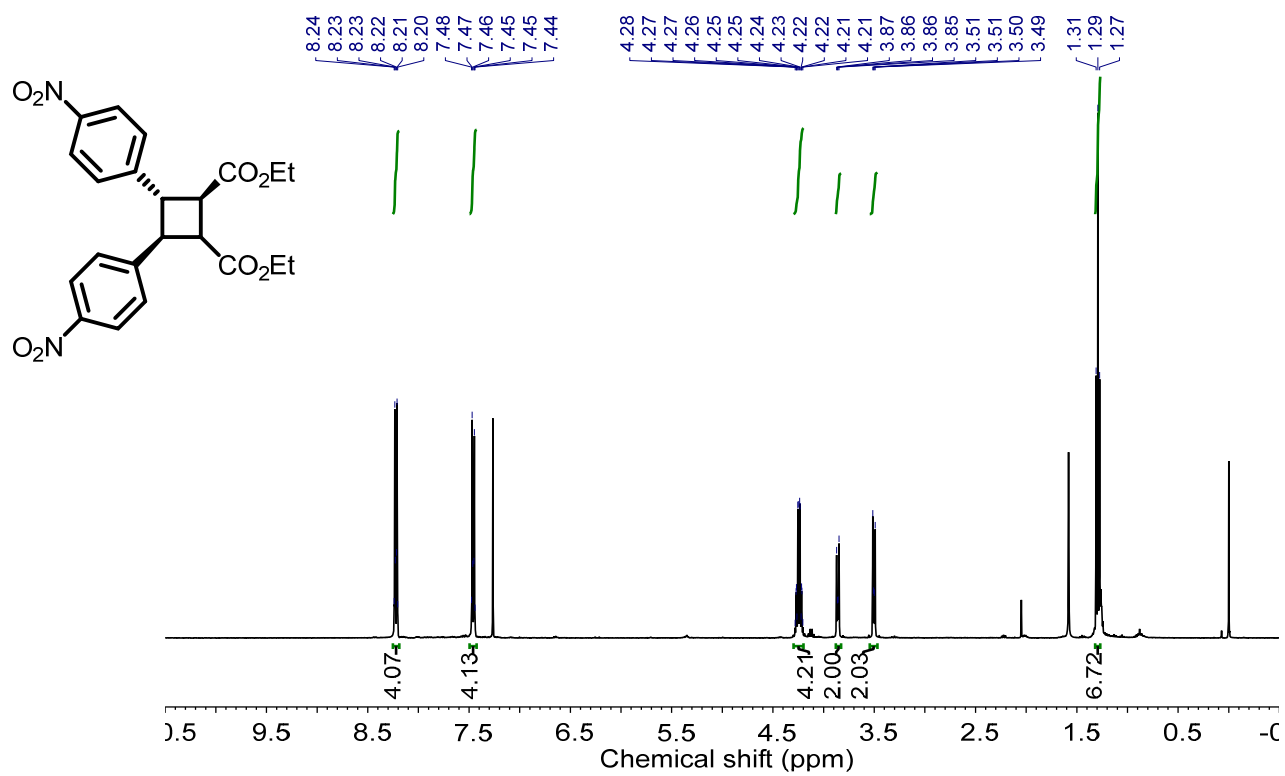

7r (major product),  $^1\text{H}$  NMR (500 MHz, Chloroform-*d*)

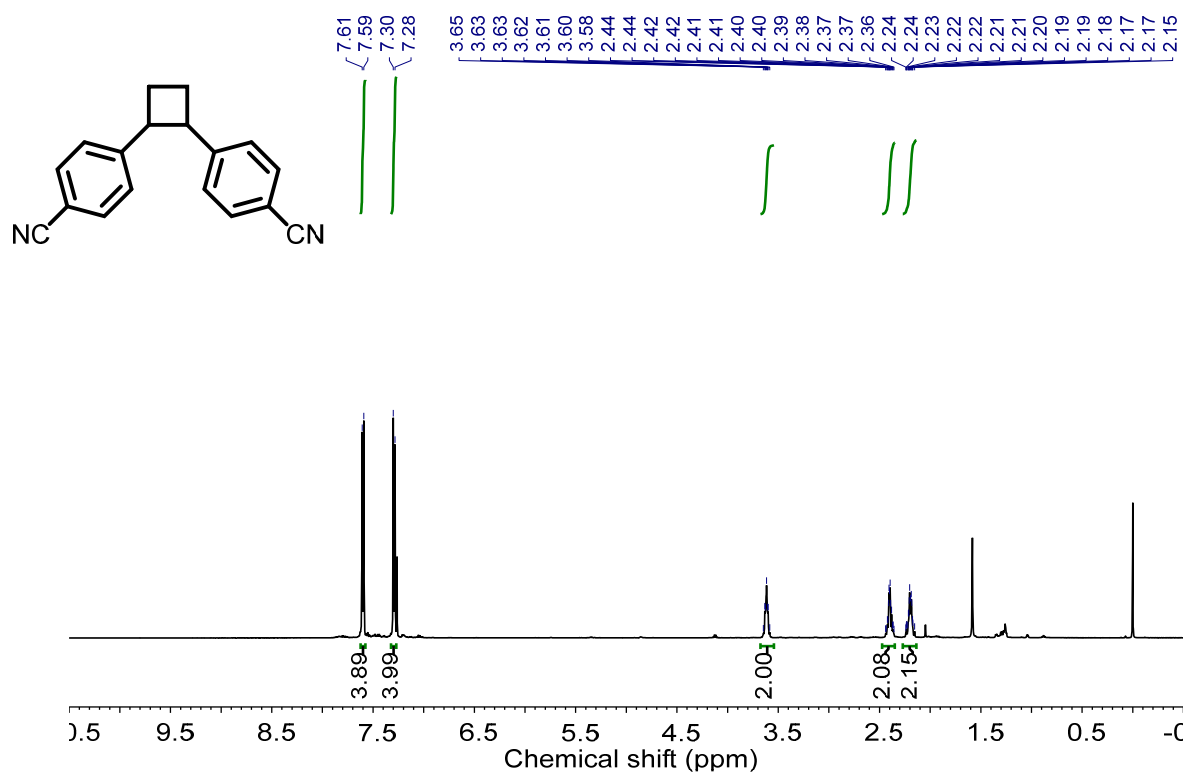

7r (major product),  $^{13}\text{C}$  NMR (126 MHz, Chloroform-*d*)

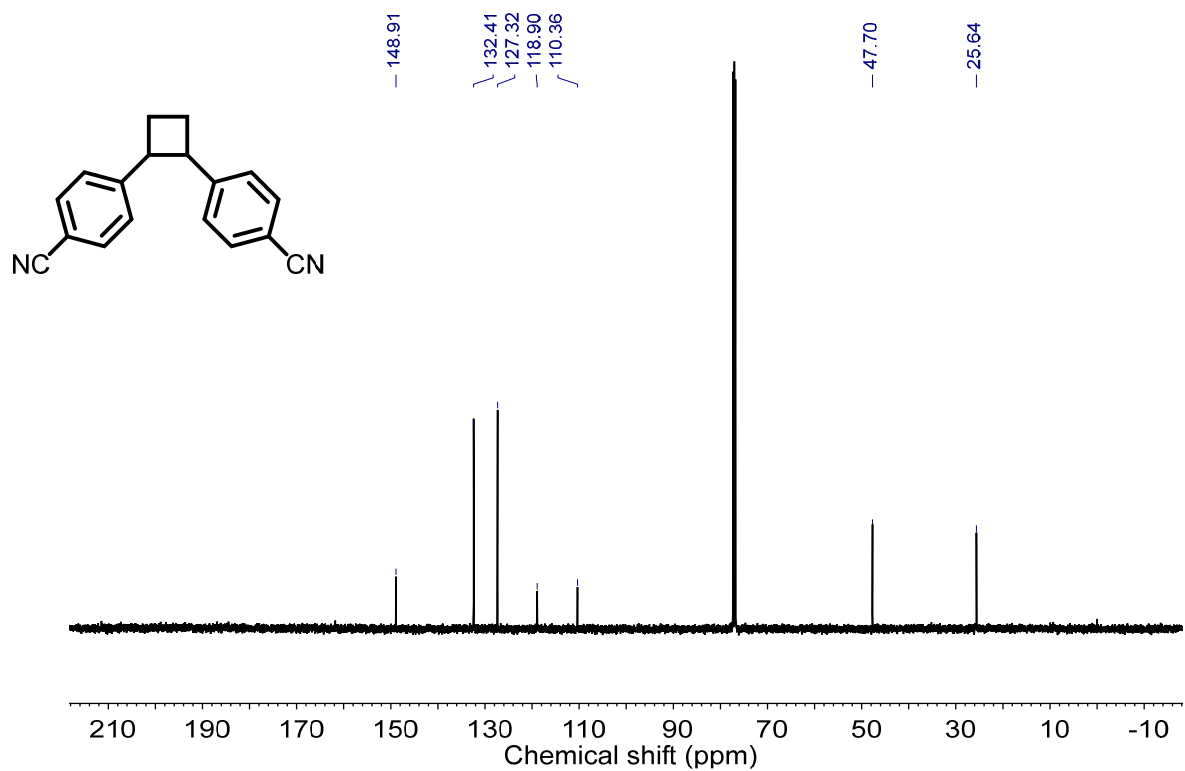



7r (minor product),  $^1\text{H}$  NMR (500 MHz, Chloroform-*d*)

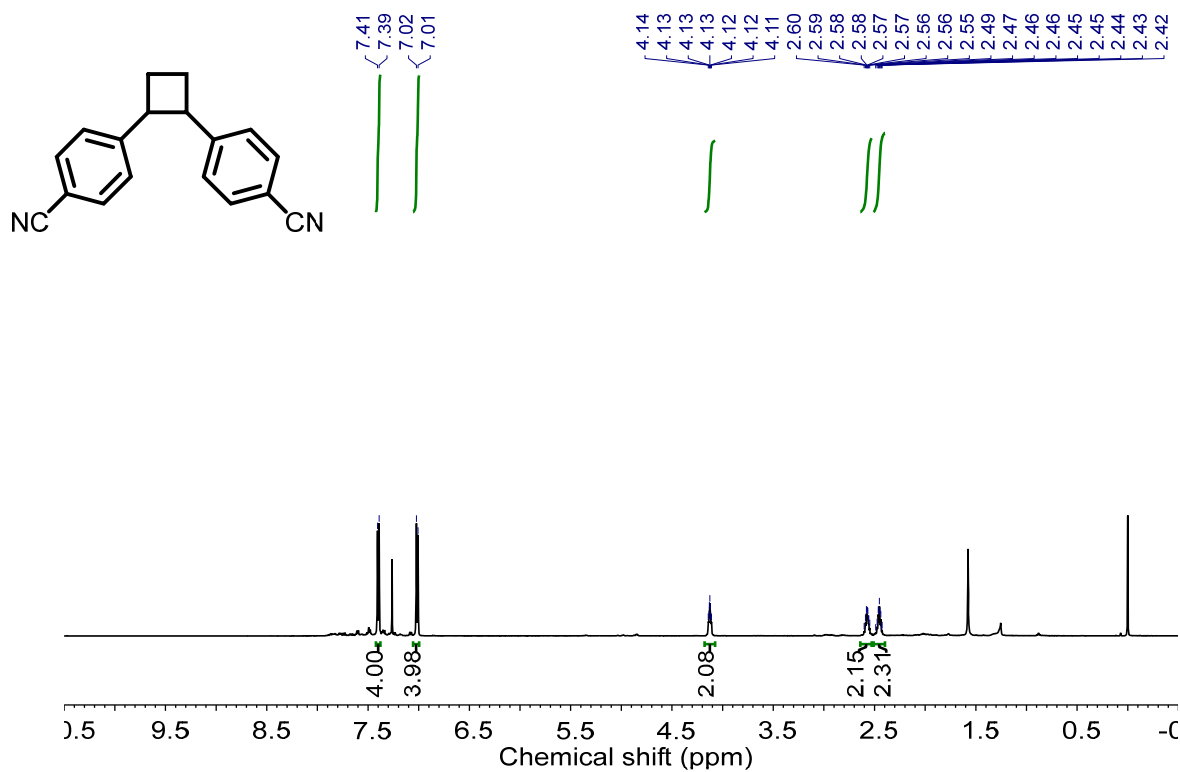

7r (minor product),  $^{13}\text{C}$  NMR (126 MHz, Chloroform-*d*)

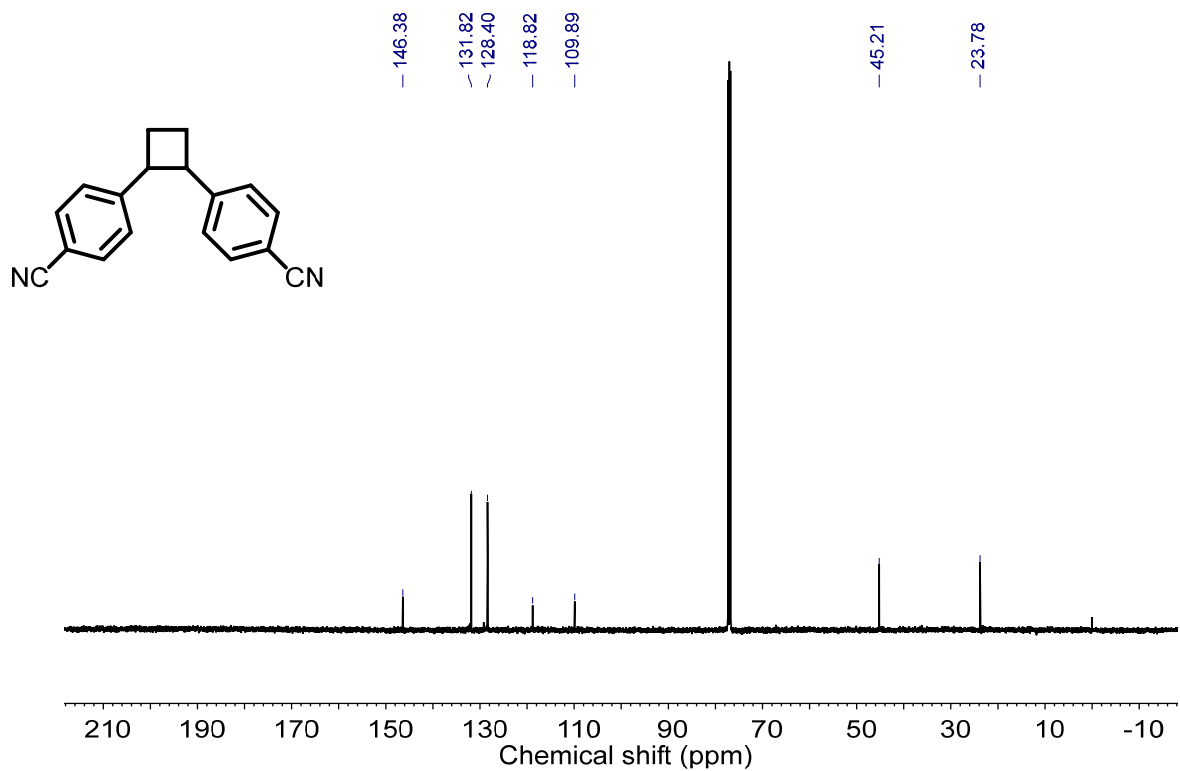

*N*-methoxy-*N*-methylbicyclo[1.1.0]butane-1-carboxamide

$^1\text{H}$  NMR (600 MHz, Chloroform-*d*)

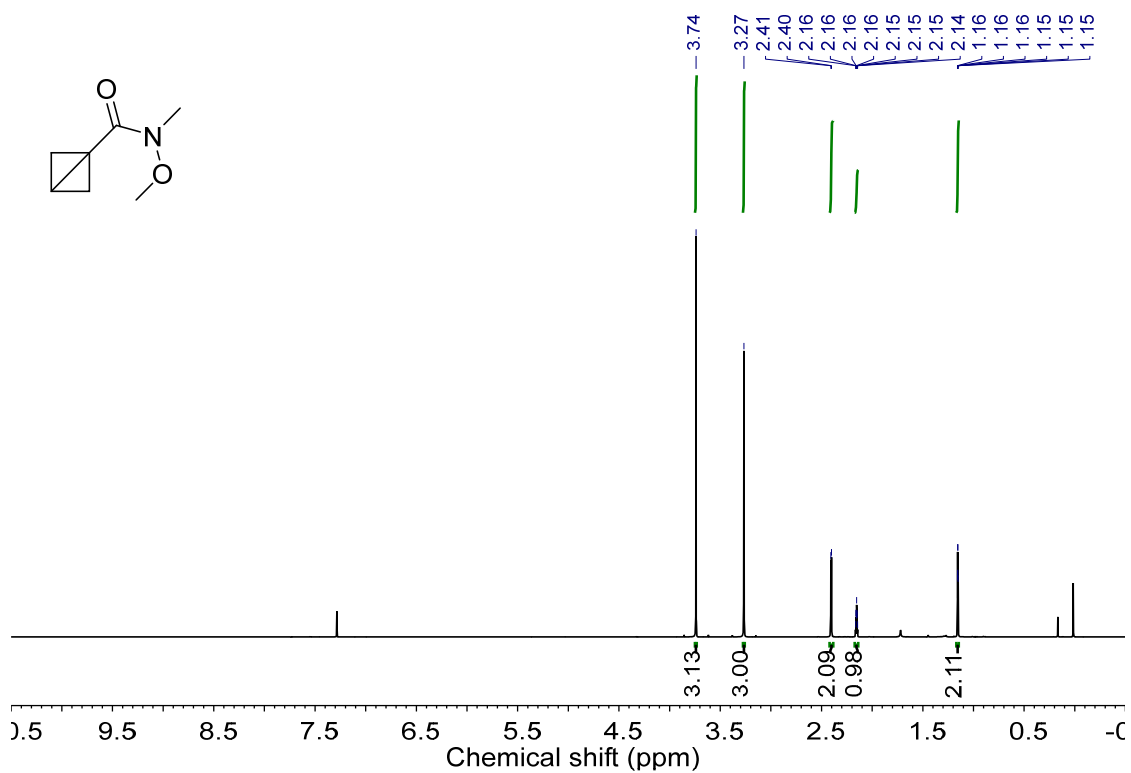

*N*-methoxy-*N*-methylbicyclo[1.1.0]butane-1-carboxamide

$^{13}\text{C}$  NMR (151 MHz, Chloroform-*d*)

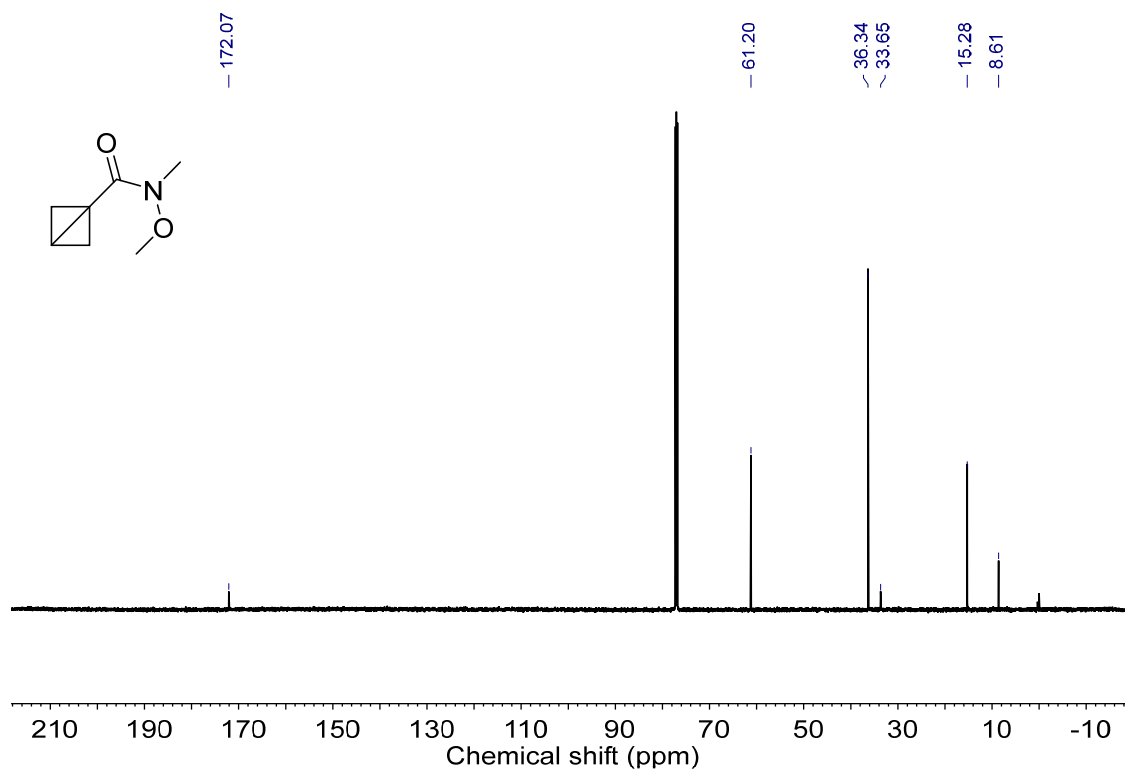

7s, <sup>1</sup>H NMR (600 MHz, Chloroform-*d*)

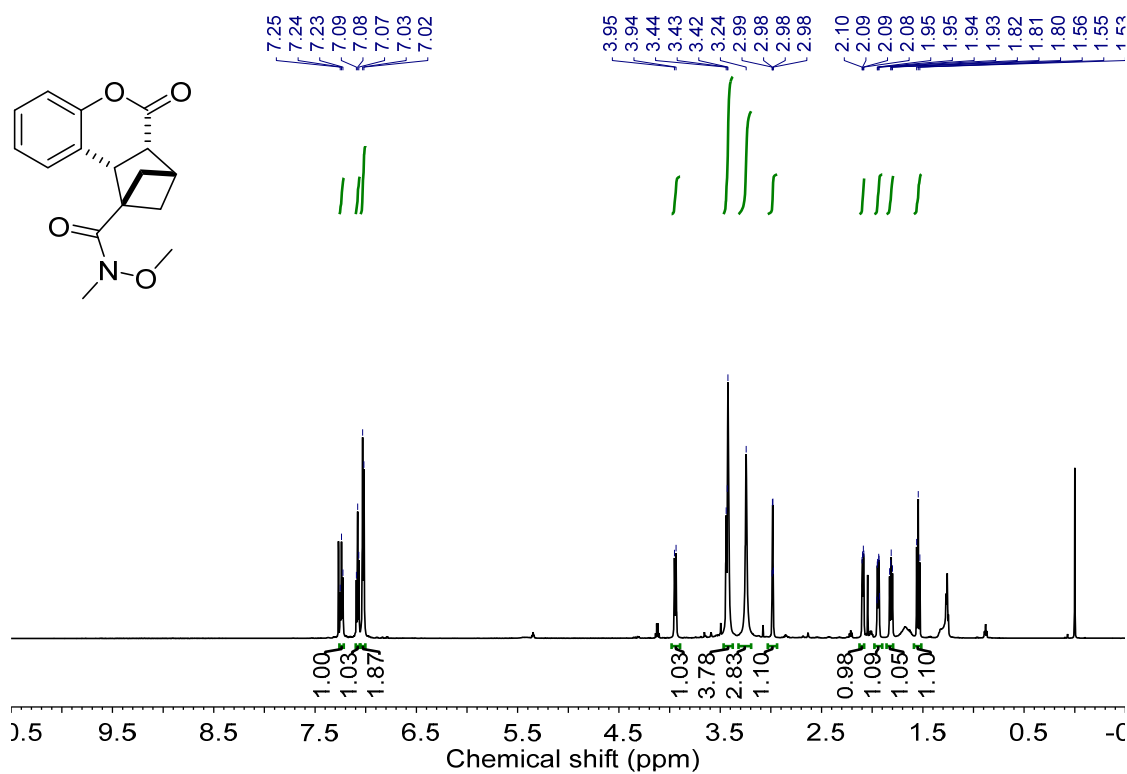

7s, <sup>13</sup>C NMR (151 MHz, Chloroform-*d*)

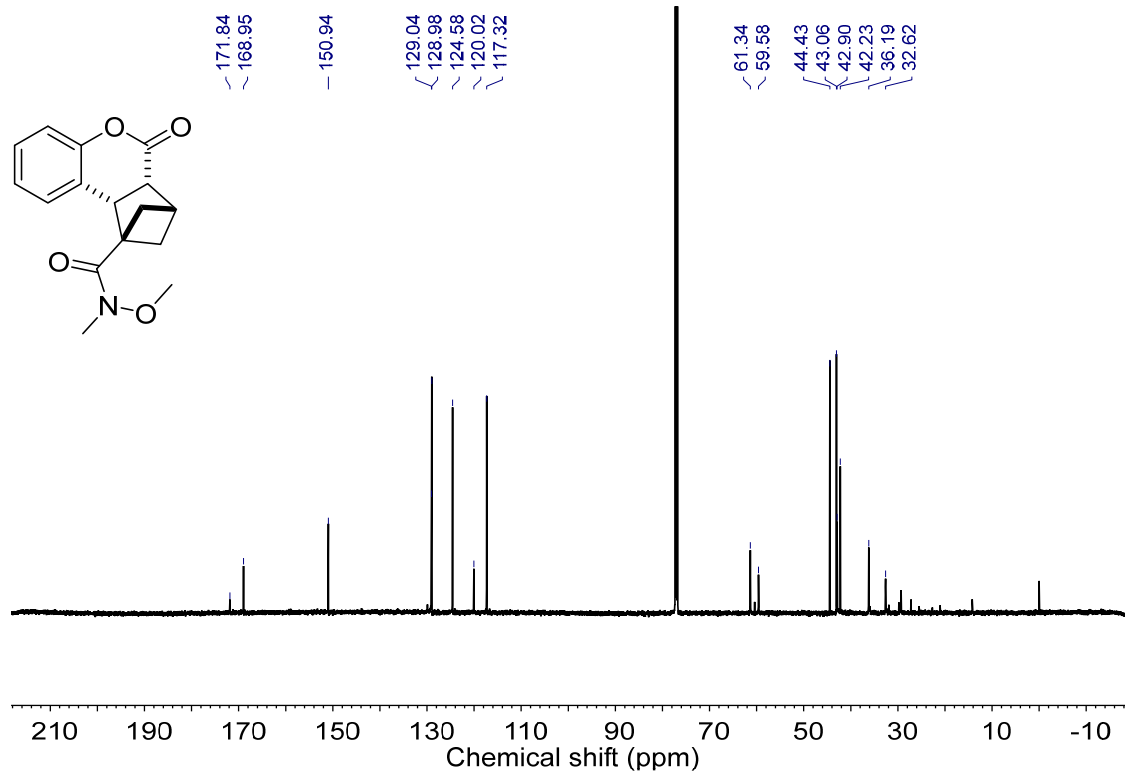

8a, <sup>1</sup>H NMR (400 MHz, CDCl<sub>3</sub>)

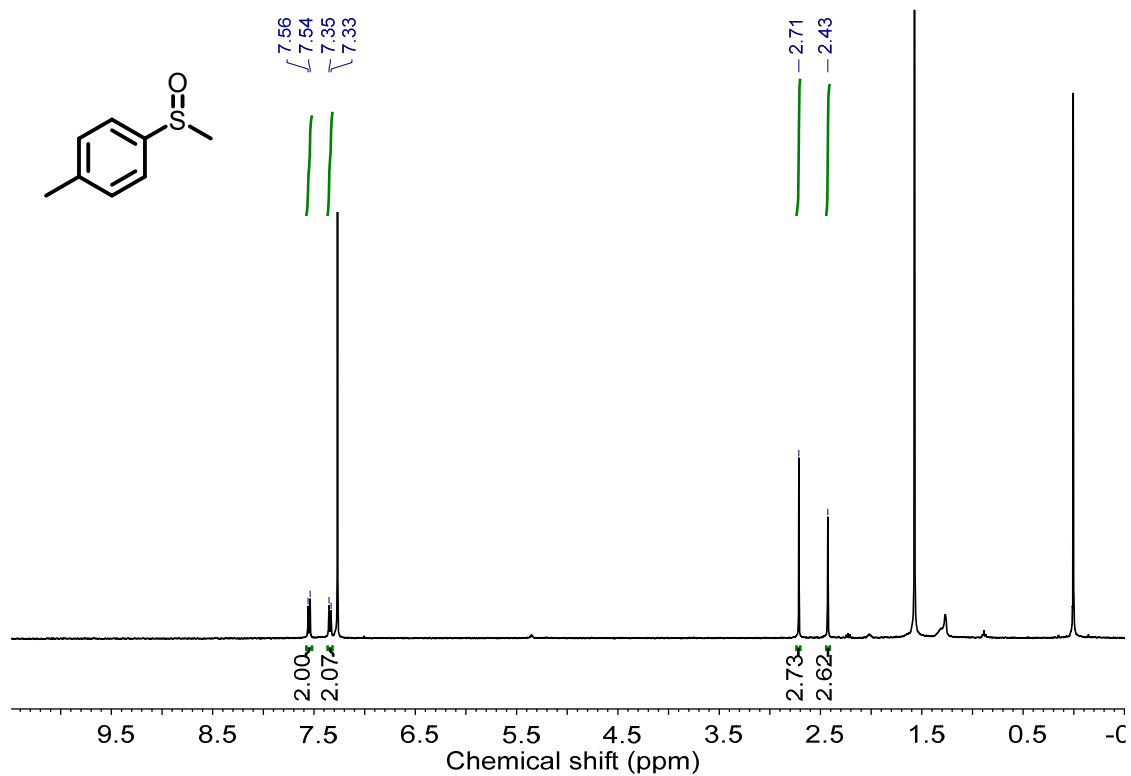

8b, <sup>1</sup>H NMR (600 MHz, CDCl<sub>3</sub>)

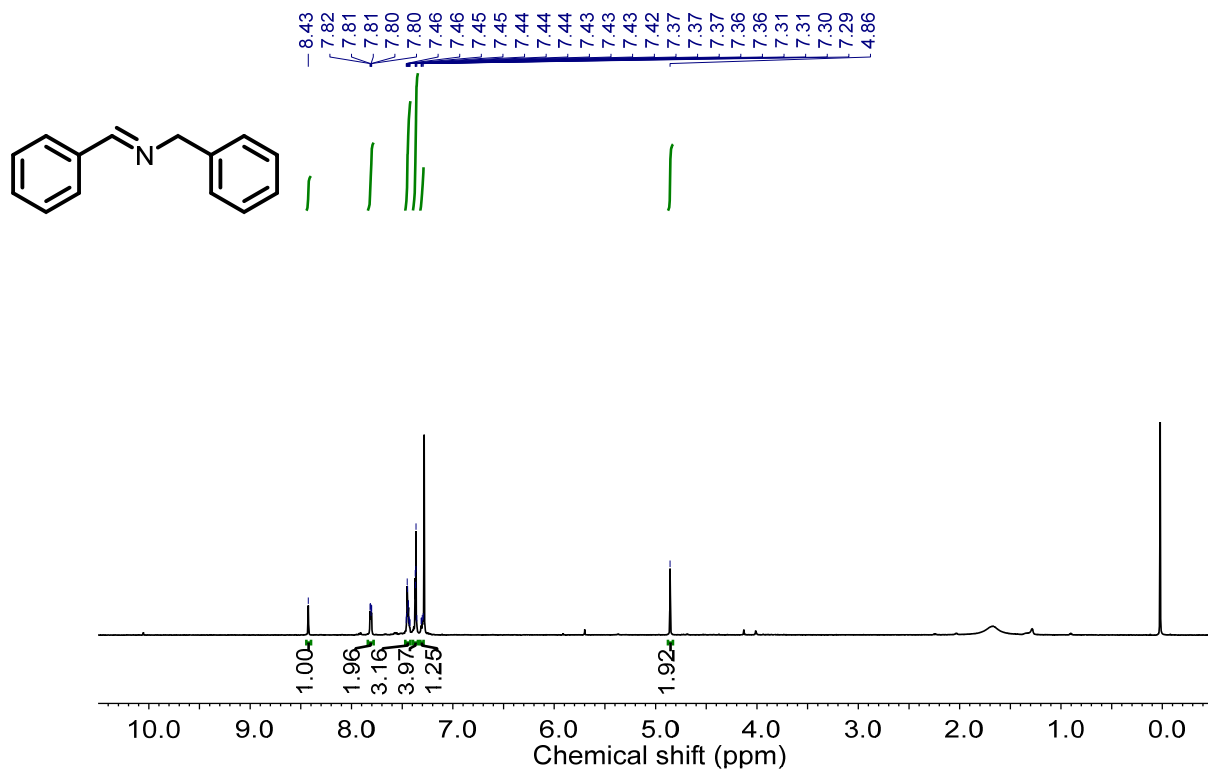

8c, <sup>1</sup>H NMR (400 MHz, CDCl<sub>3</sub>)

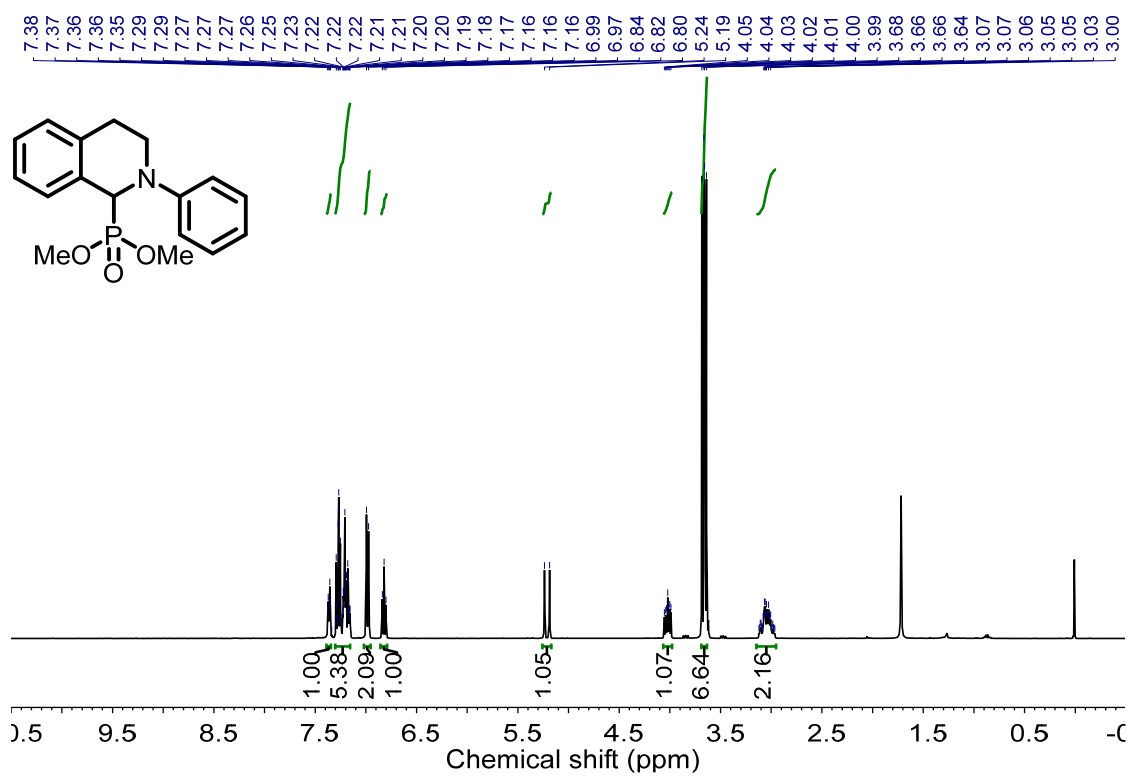

8c, <sup>13</sup>C NMR (101 MHz, CDCl<sub>3</sub>)

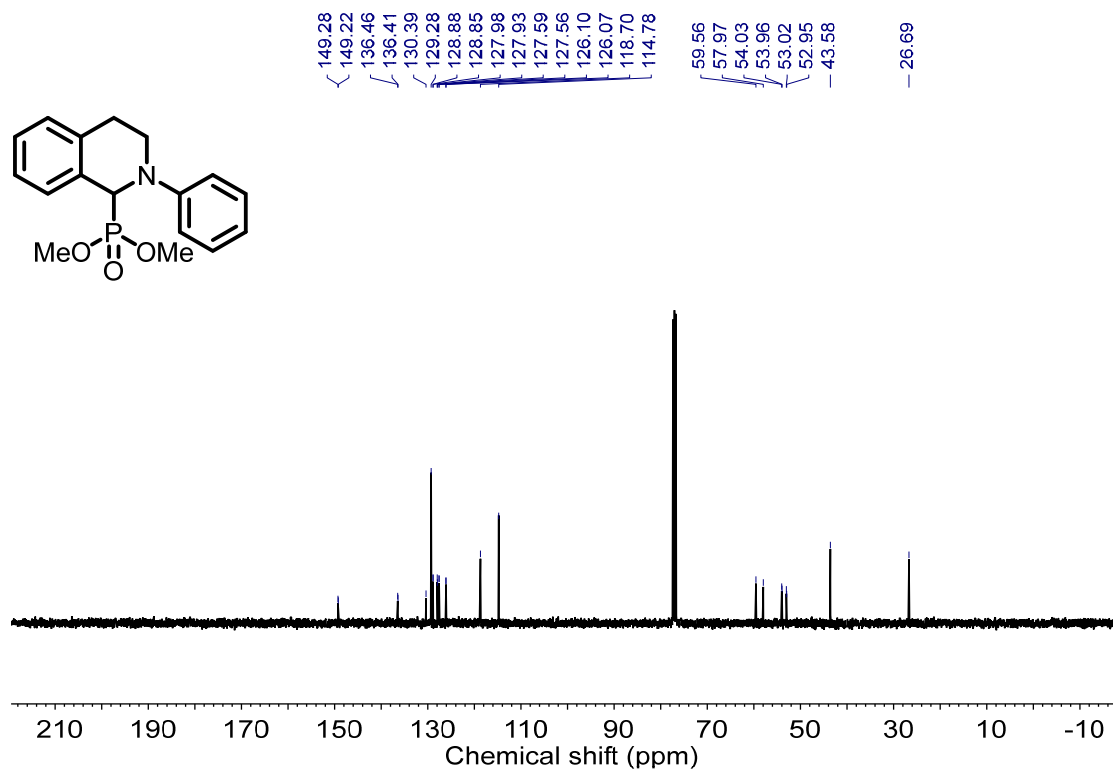

8d, <sup>1</sup>H NMR (400 MHz, CDCl<sub>3</sub>)

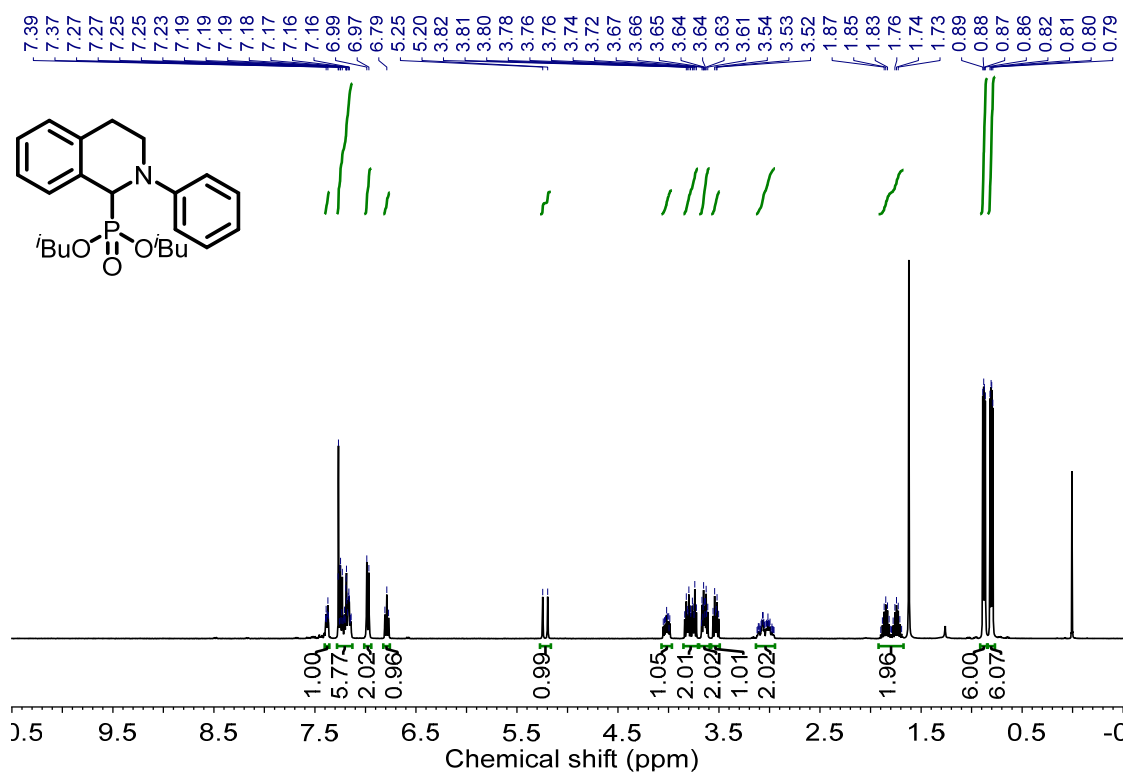

8d, <sup>13</sup>C NMR (126 MHz, CDCl<sub>3</sub>)

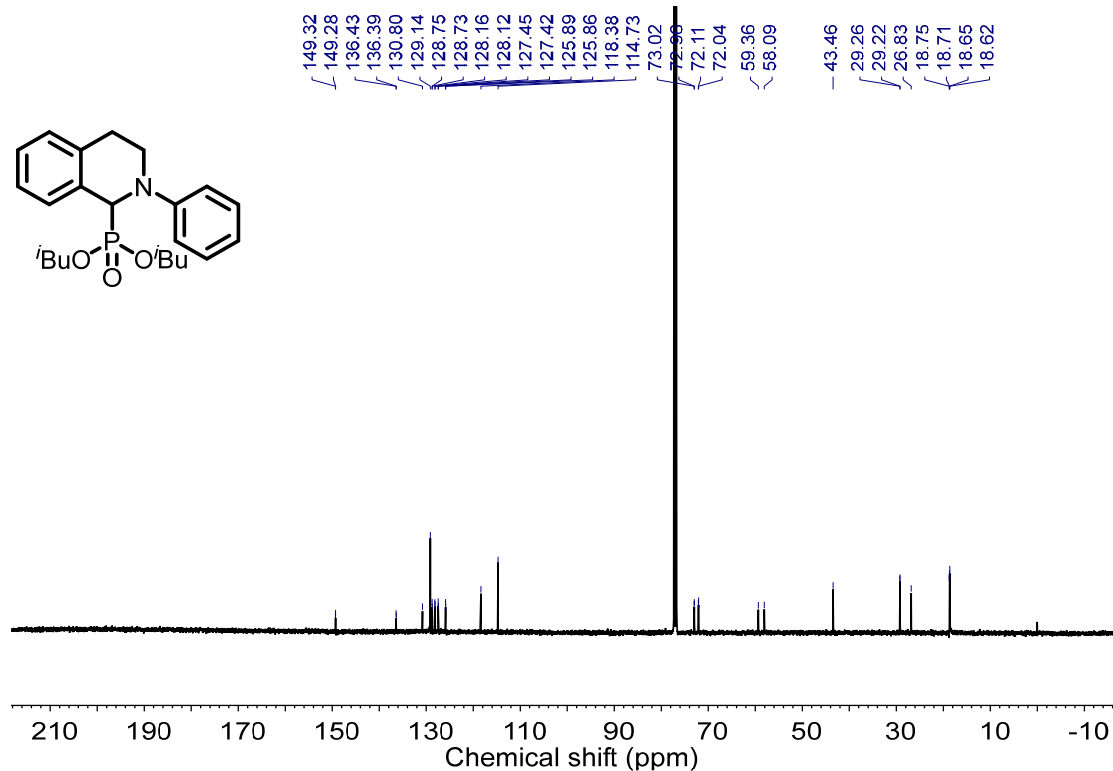

8e,  $^1\text{H}$  NMR (400 MHz,  $\text{CDCl}_3$ )

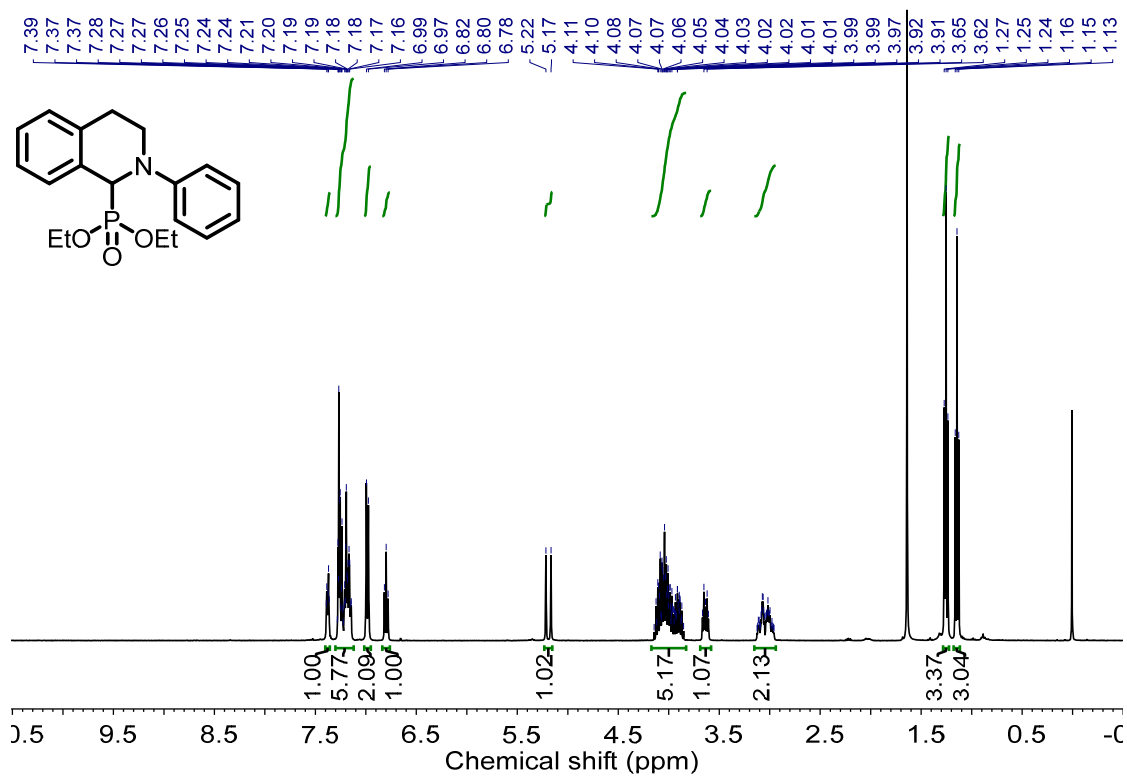

8e,  $^{13}\text{C}$  NMR (126 MHz,  $\text{CDCl}_3$ )

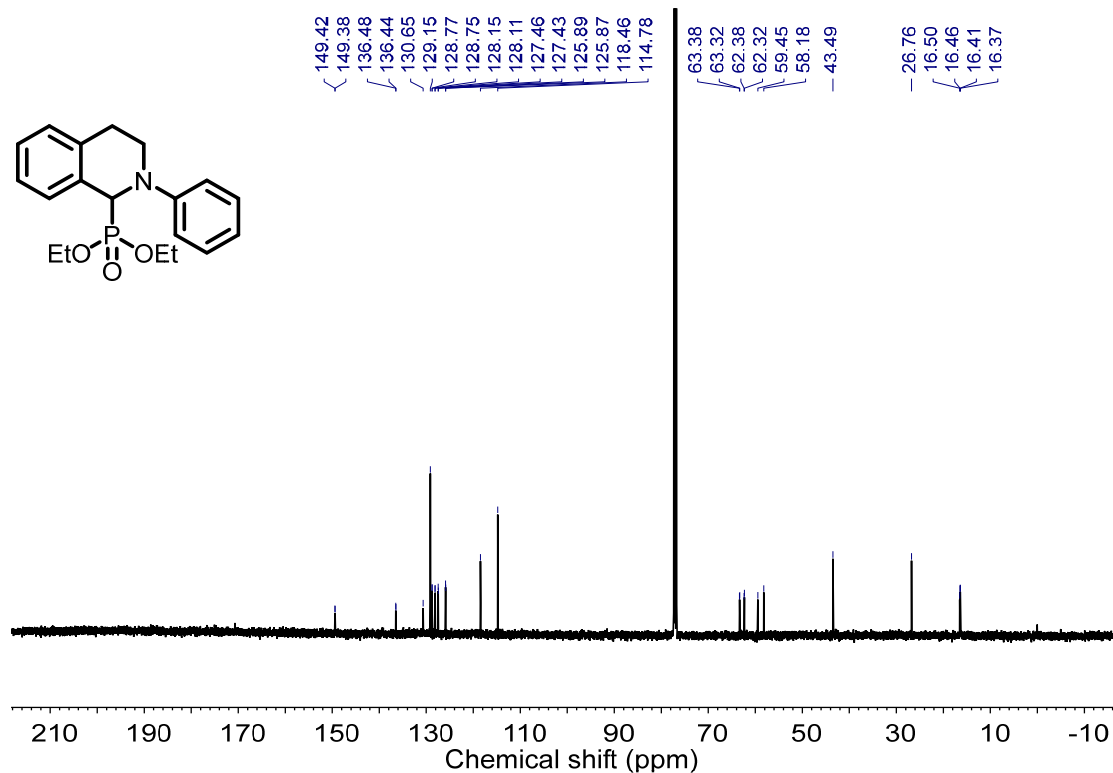

8f, <sup>1</sup>H NMR (400 MHz, CDCl<sub>3</sub>)

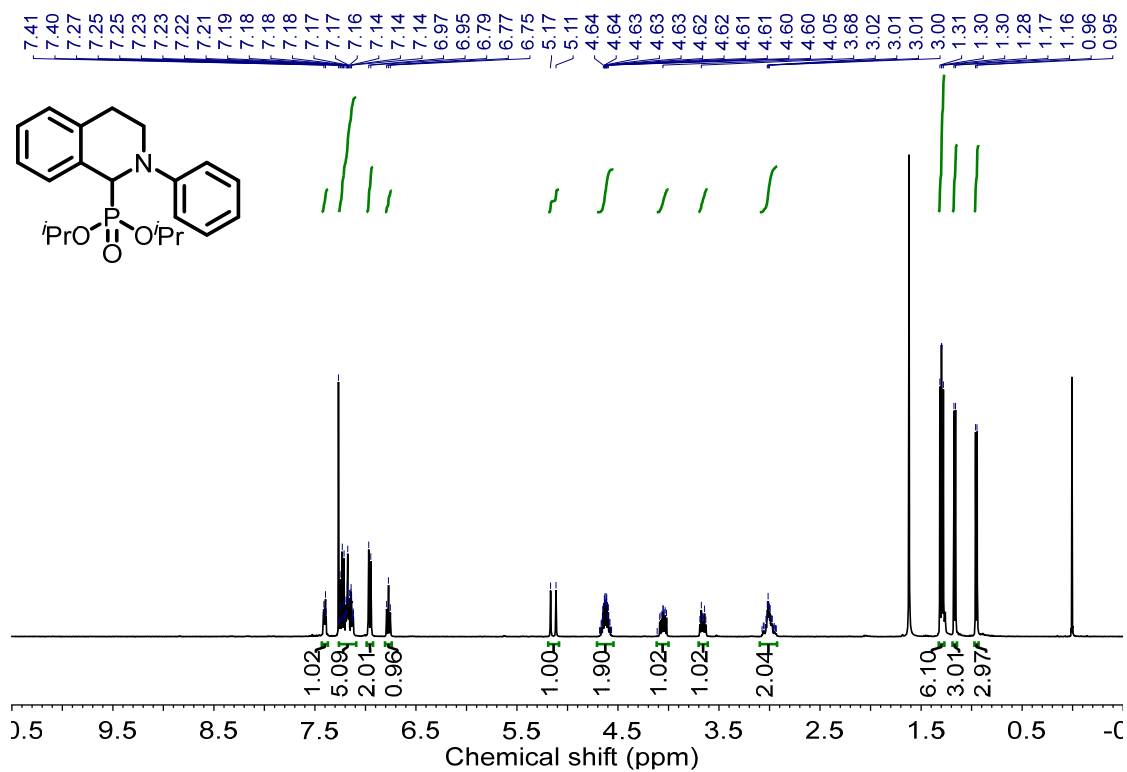

8f, <sup>13</sup>C NMR (126 MHz, CDCl<sub>3</sub>)

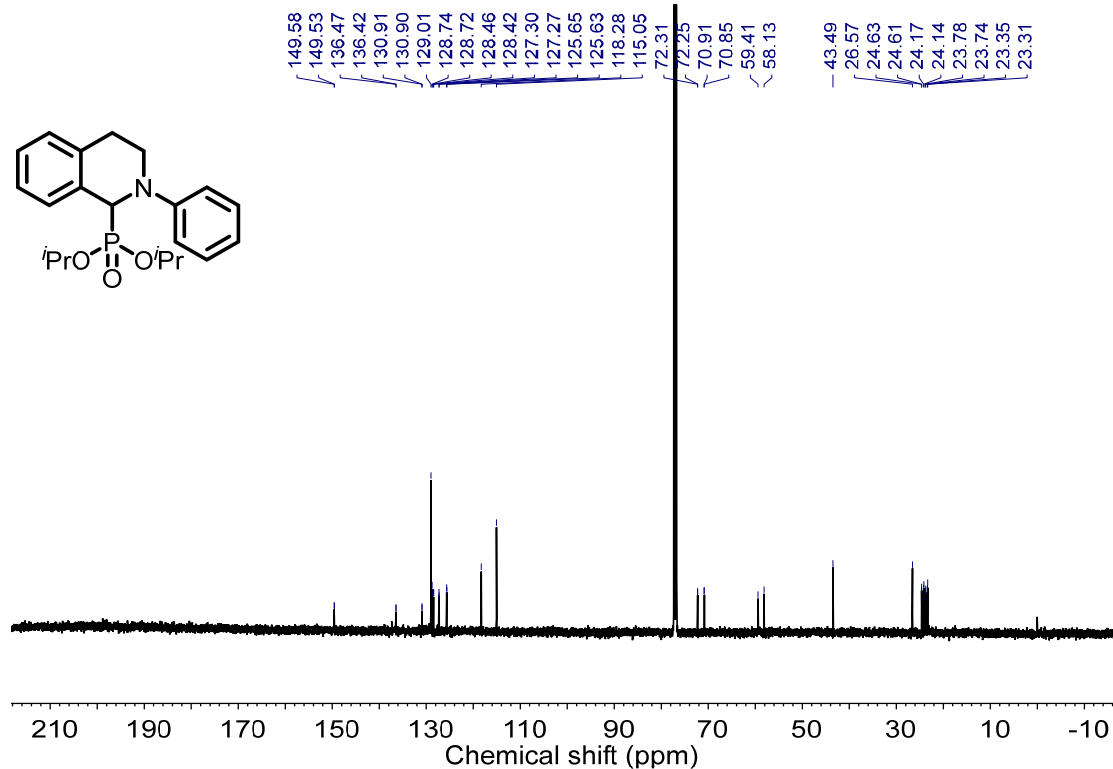



8g, <sup>1</sup>H NMR (400 MHz, CDCl<sub>3</sub>)

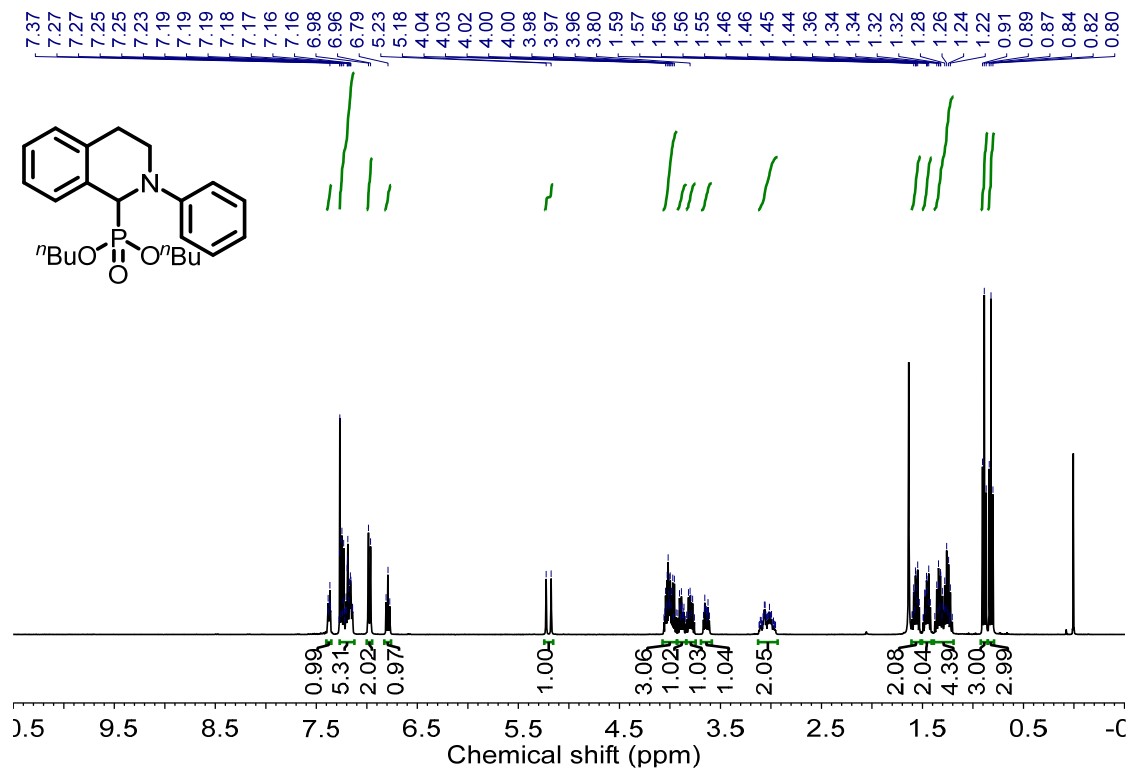

8g, <sup>13</sup>C NMR (126 MHz, CDCl<sub>3</sub>)

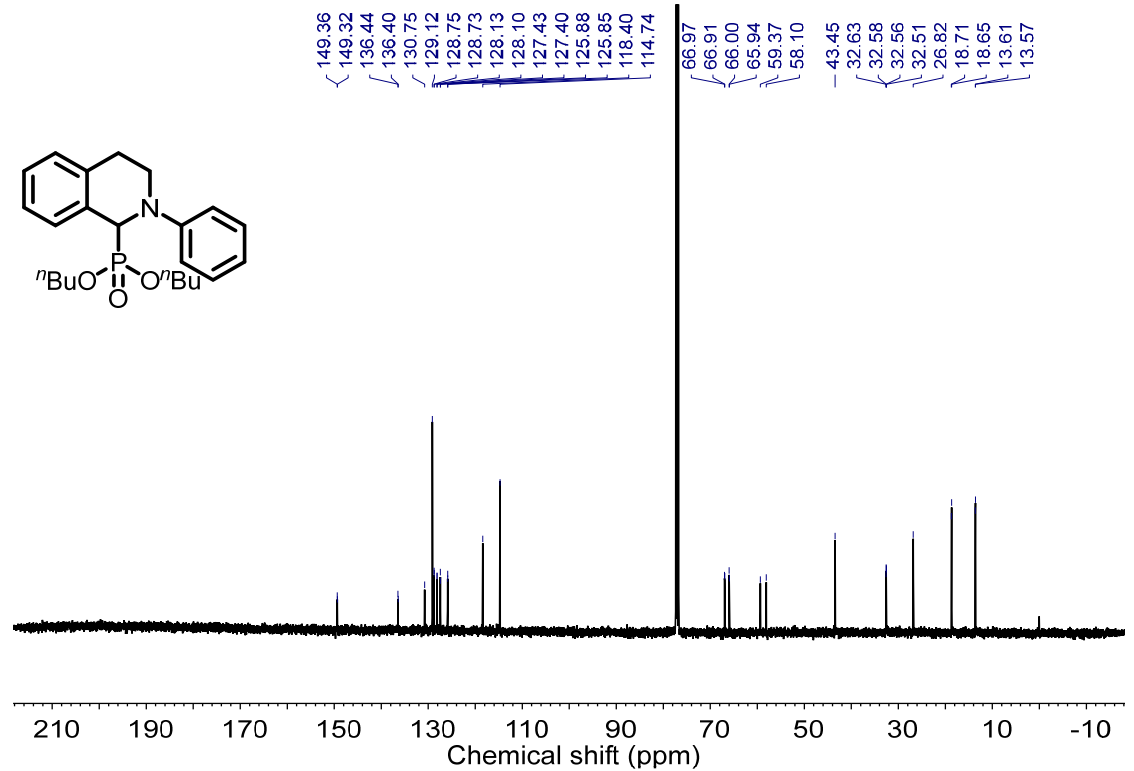

8h, <sup>1</sup>H NMR (500 MHz, CDCl<sub>3</sub>)

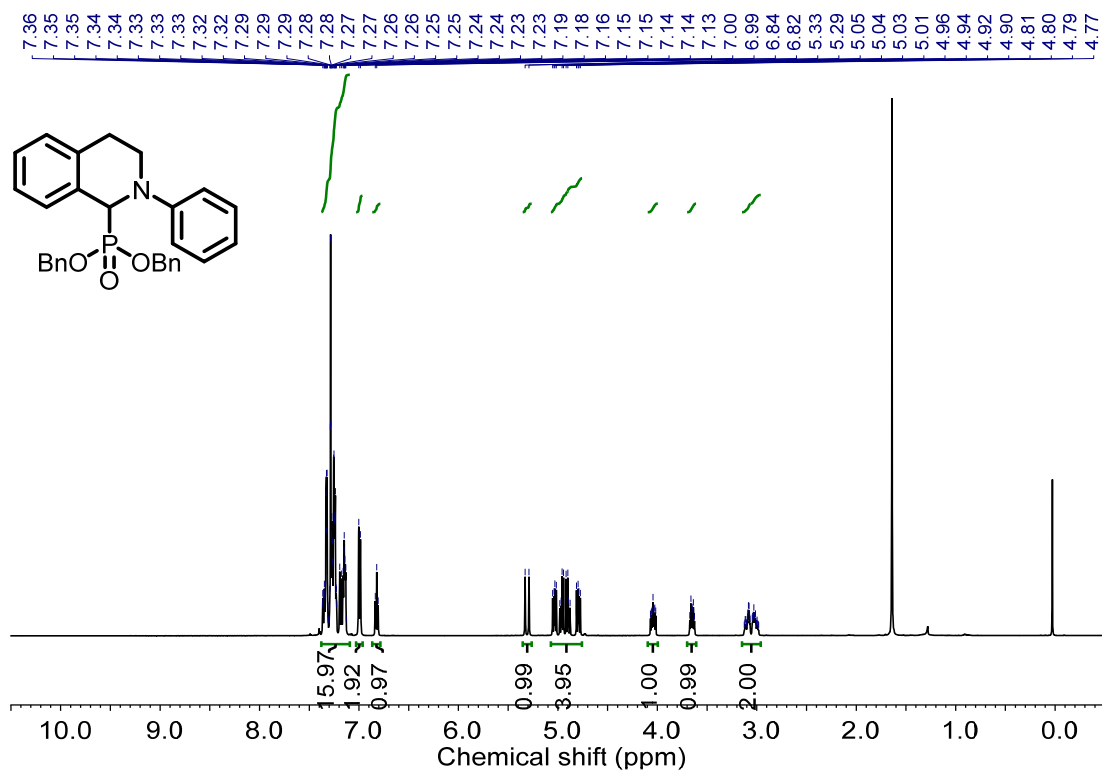

8h, <sup>13</sup>C NMR (126 MHz, CDCl<sub>3</sub>)

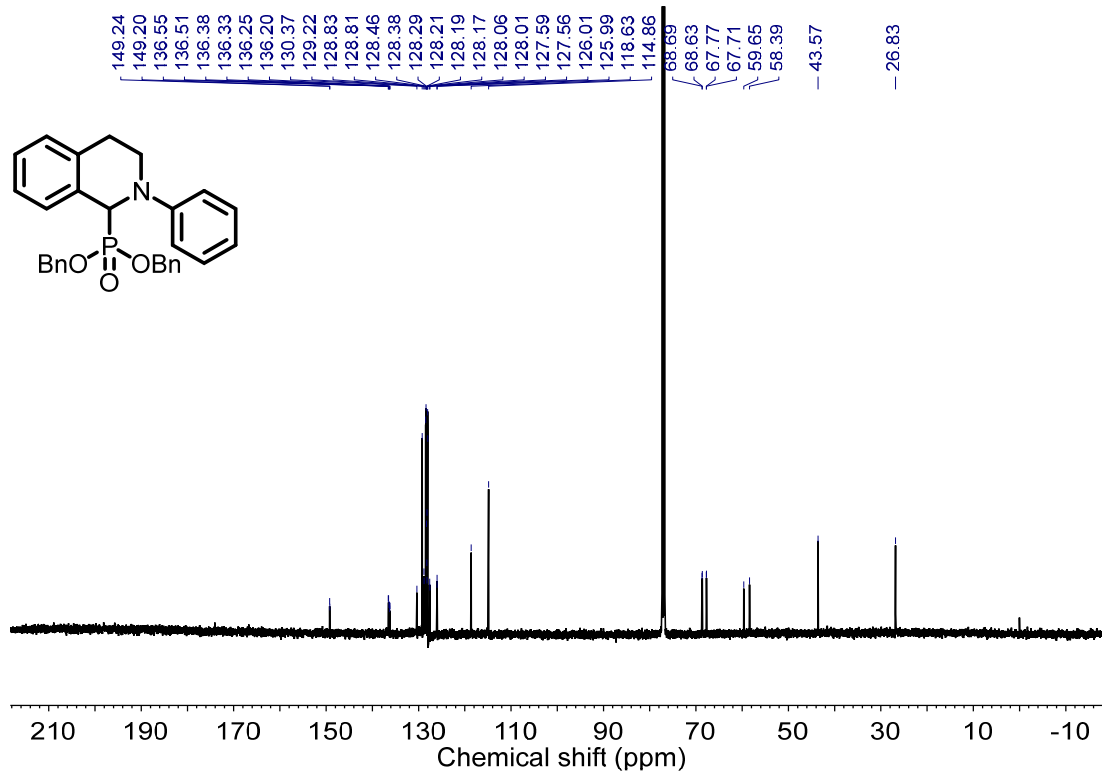

10a, <sup>1</sup>H NMR (400 MHz, CDCl<sub>3</sub>)

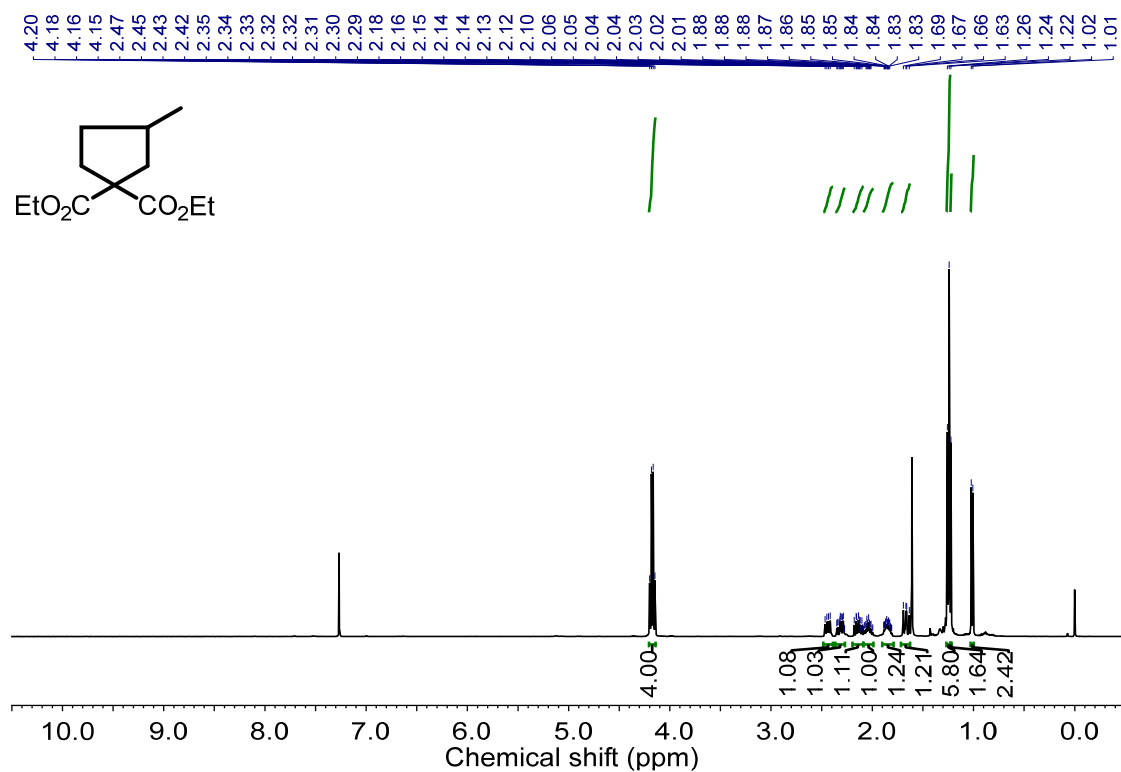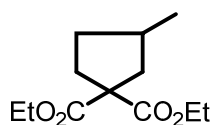

10a, <sup>13</sup>C NMR (126 MHz, CDCl<sub>3</sub>)

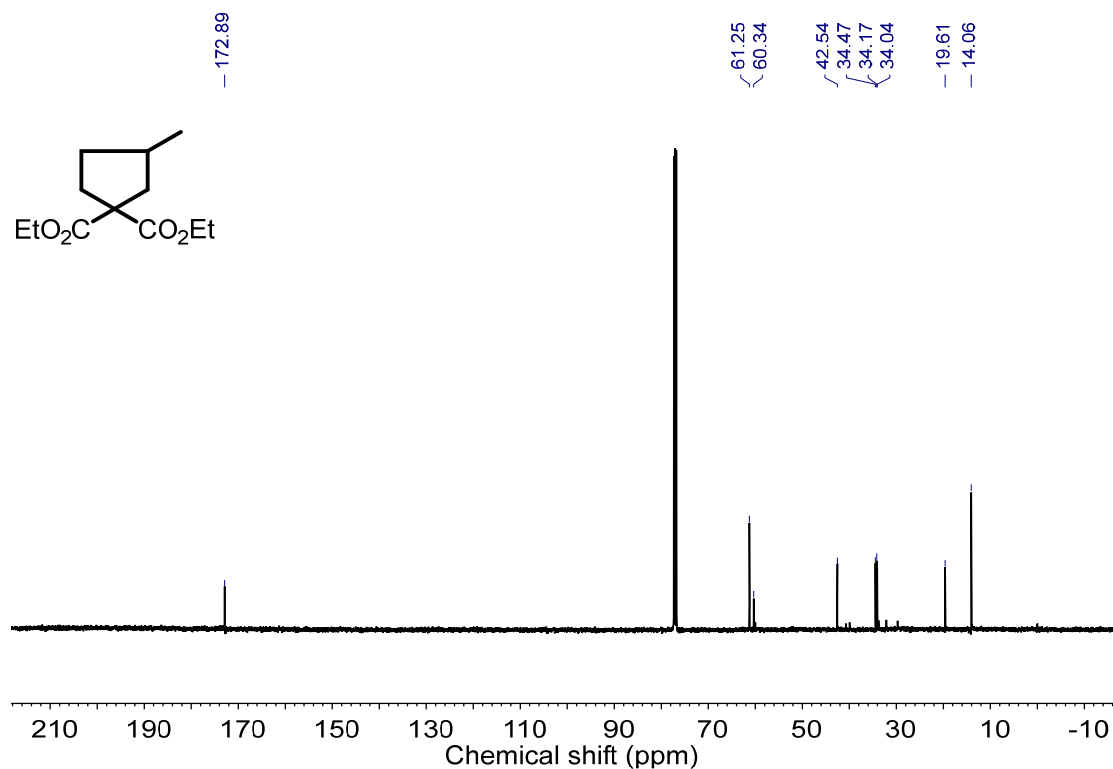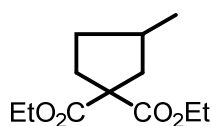

10b, <sup>1</sup>H NMR (400 MHz, CDCl<sub>3</sub>)

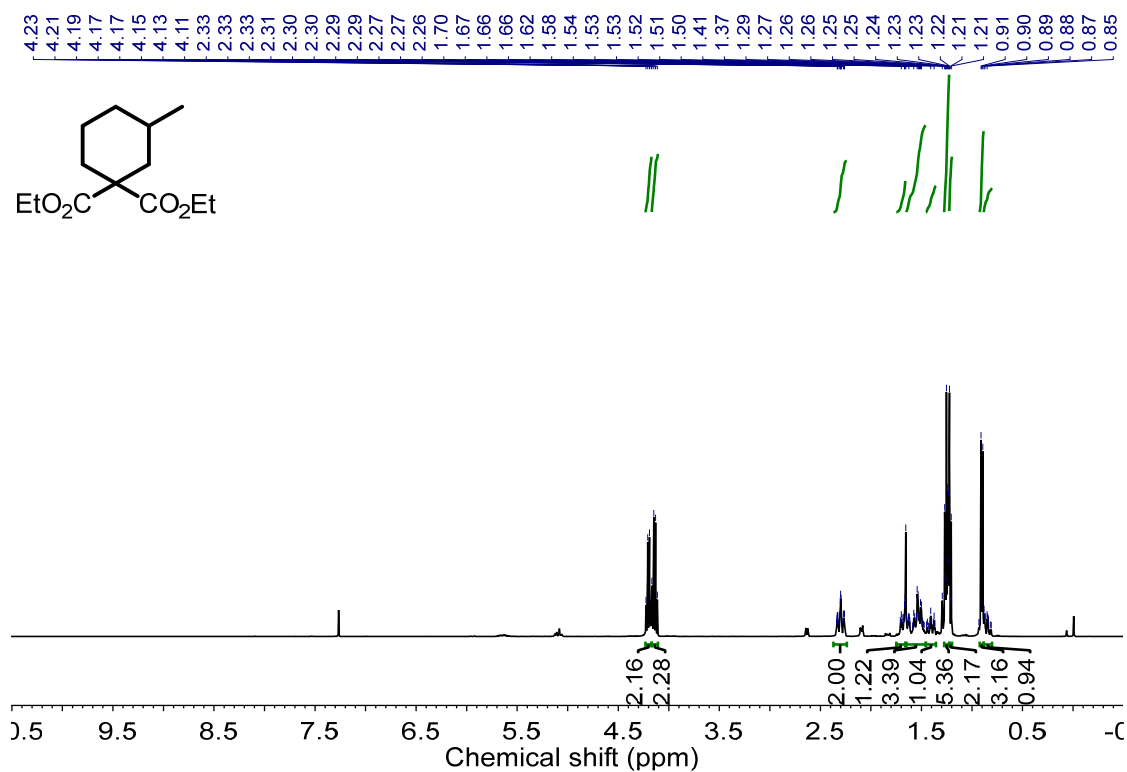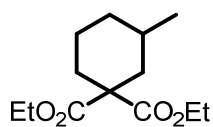

10b, <sup>13</sup>C NMR (151 MHz, CDCl<sub>3</sub>)

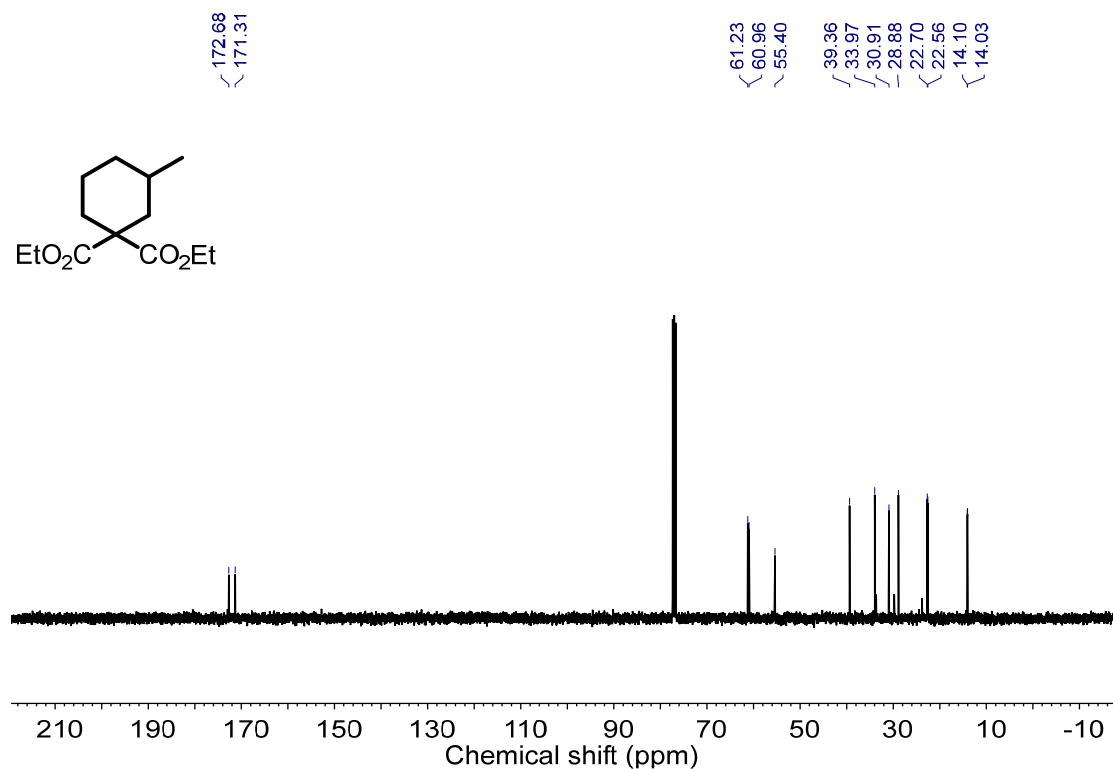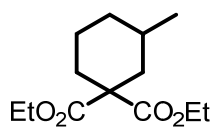

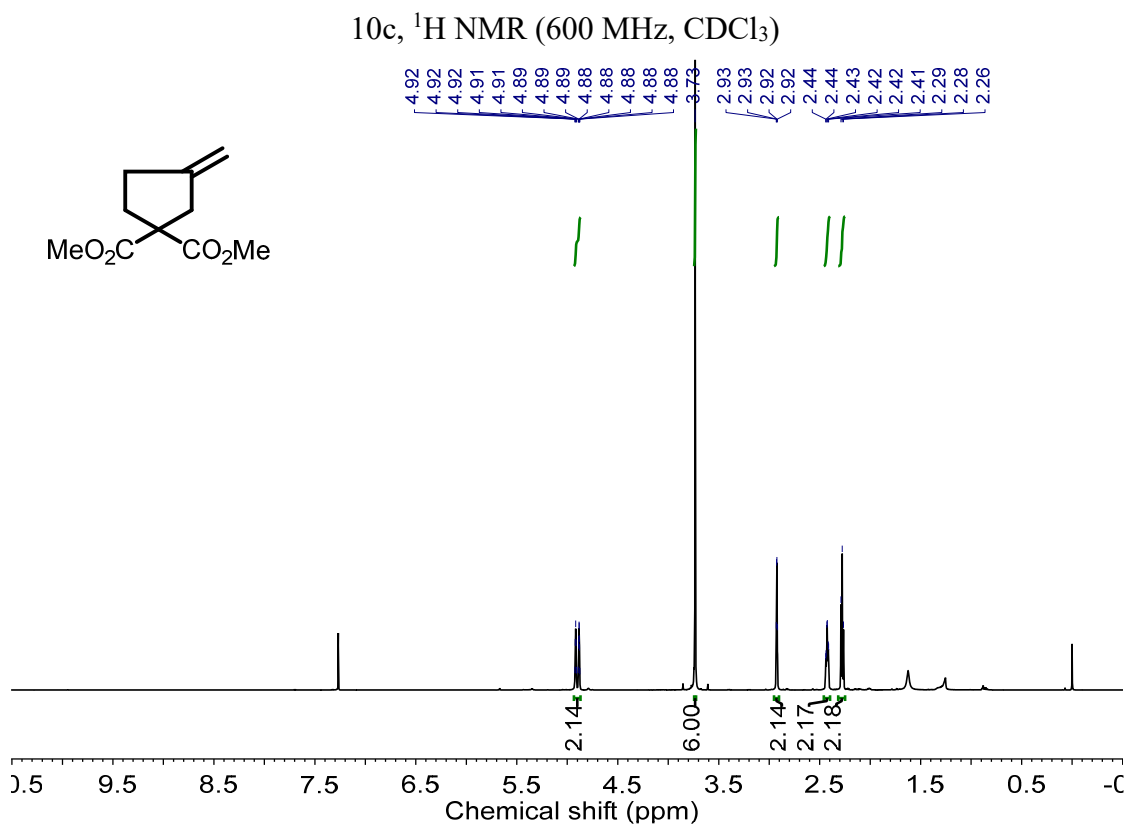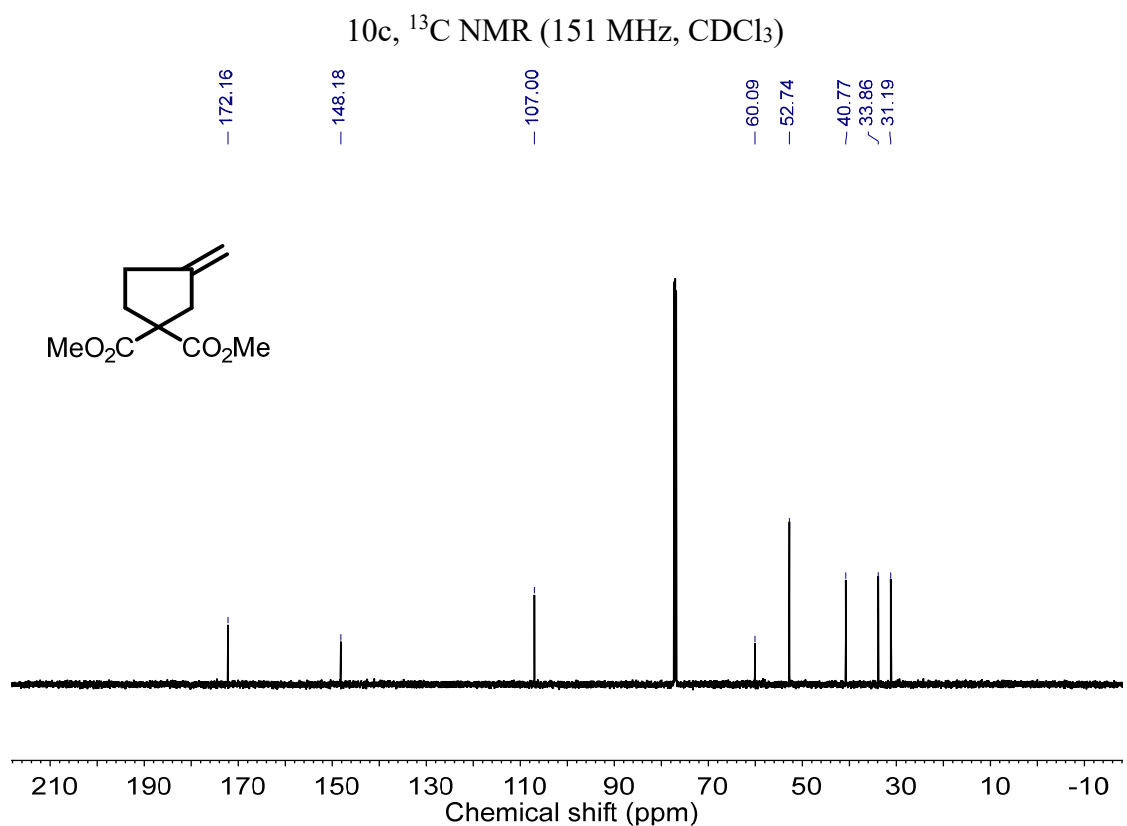

10d, <sup>1</sup>H NMR (500 MHz, CDCl<sub>3</sub>)

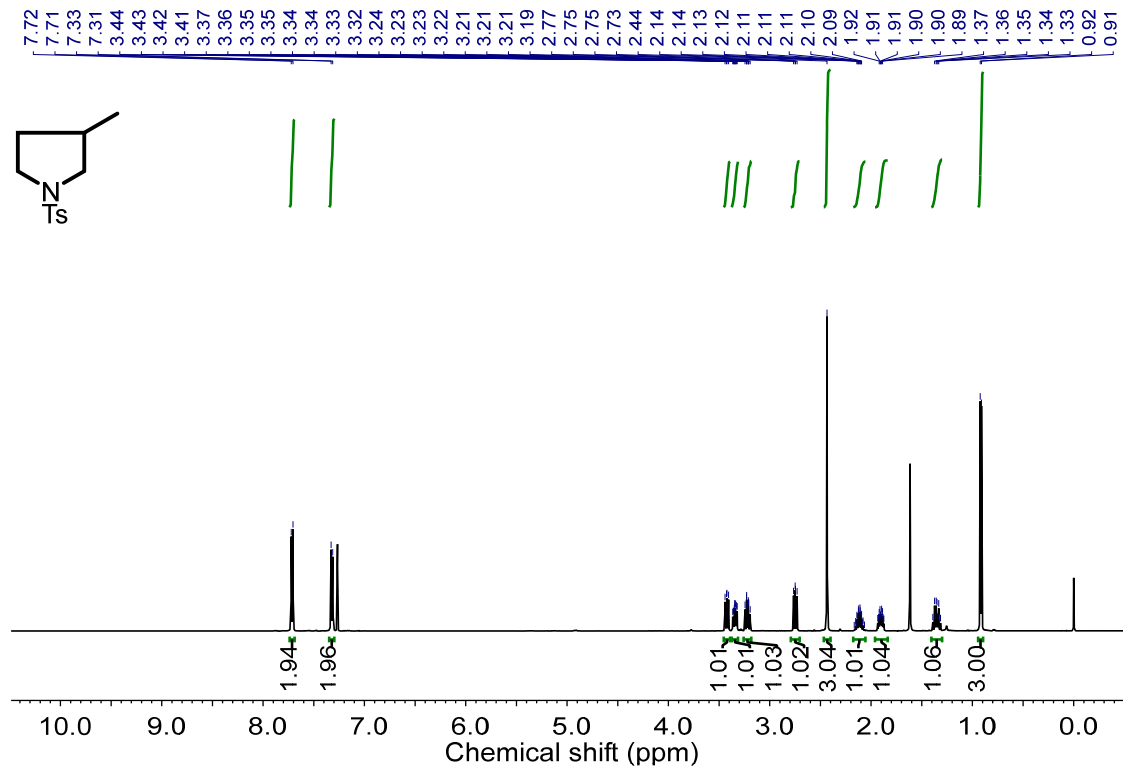

10d, <sup>13</sup>C NMR (126 MHz, CDCl<sub>3</sub>)

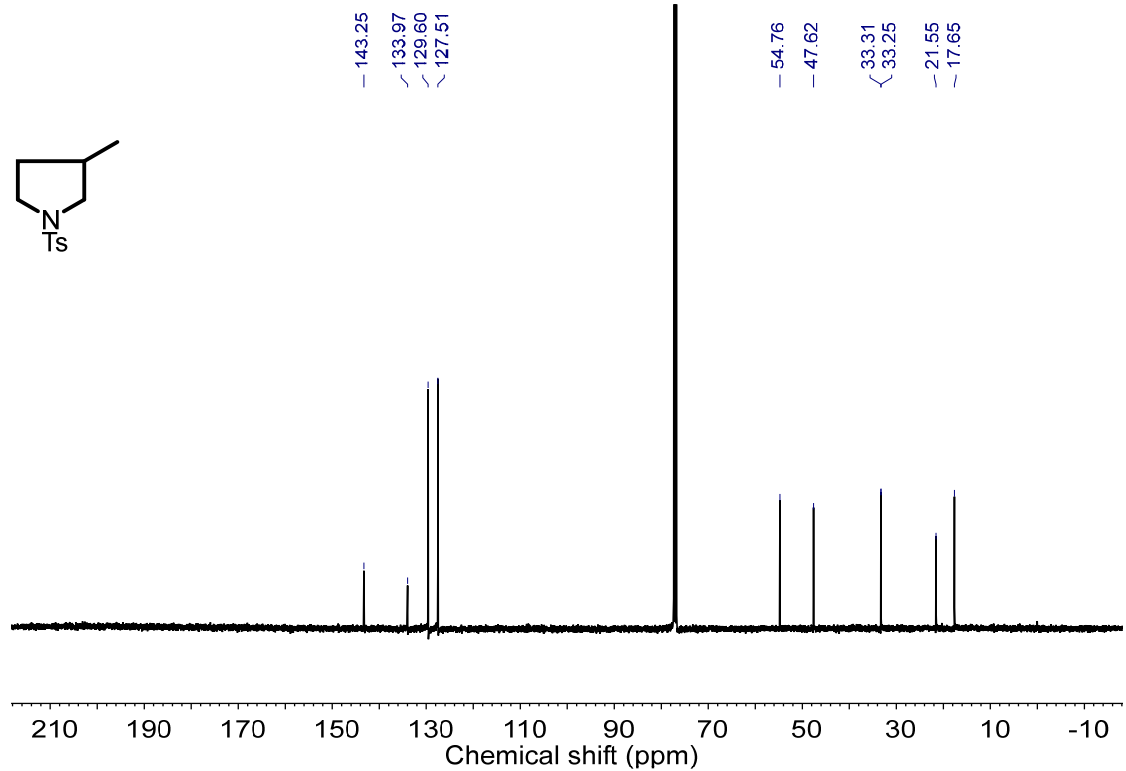

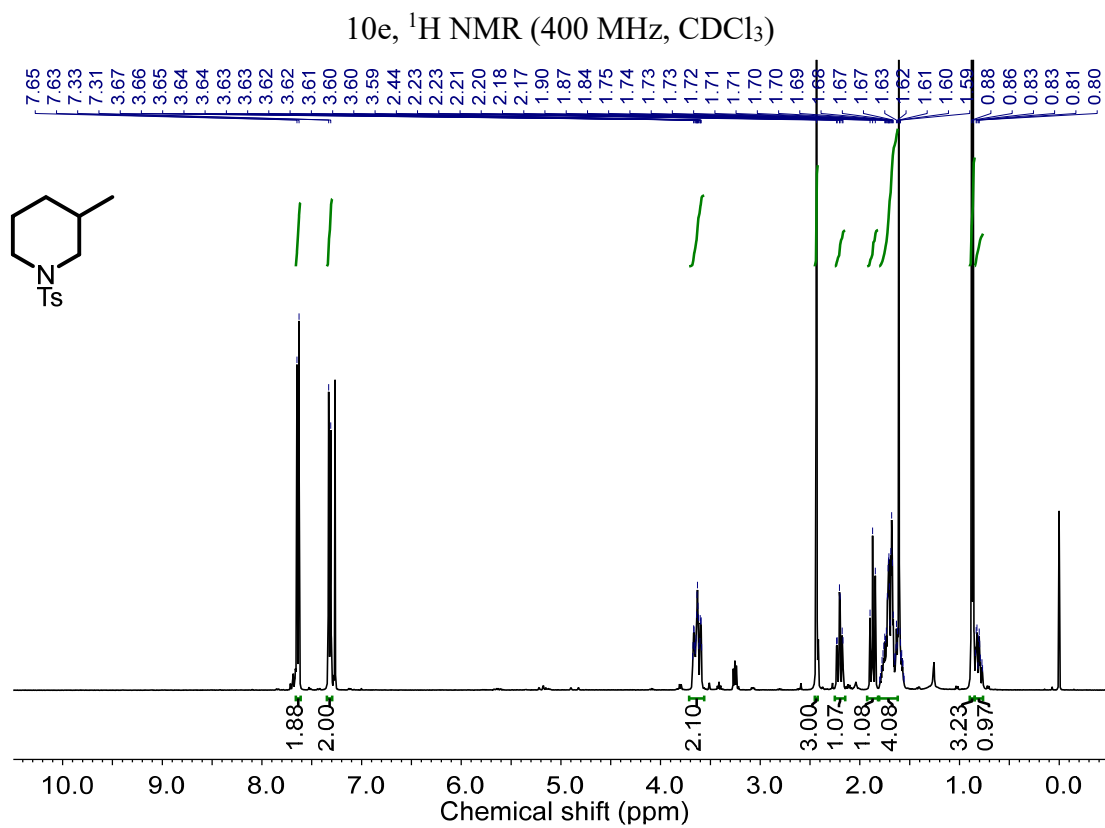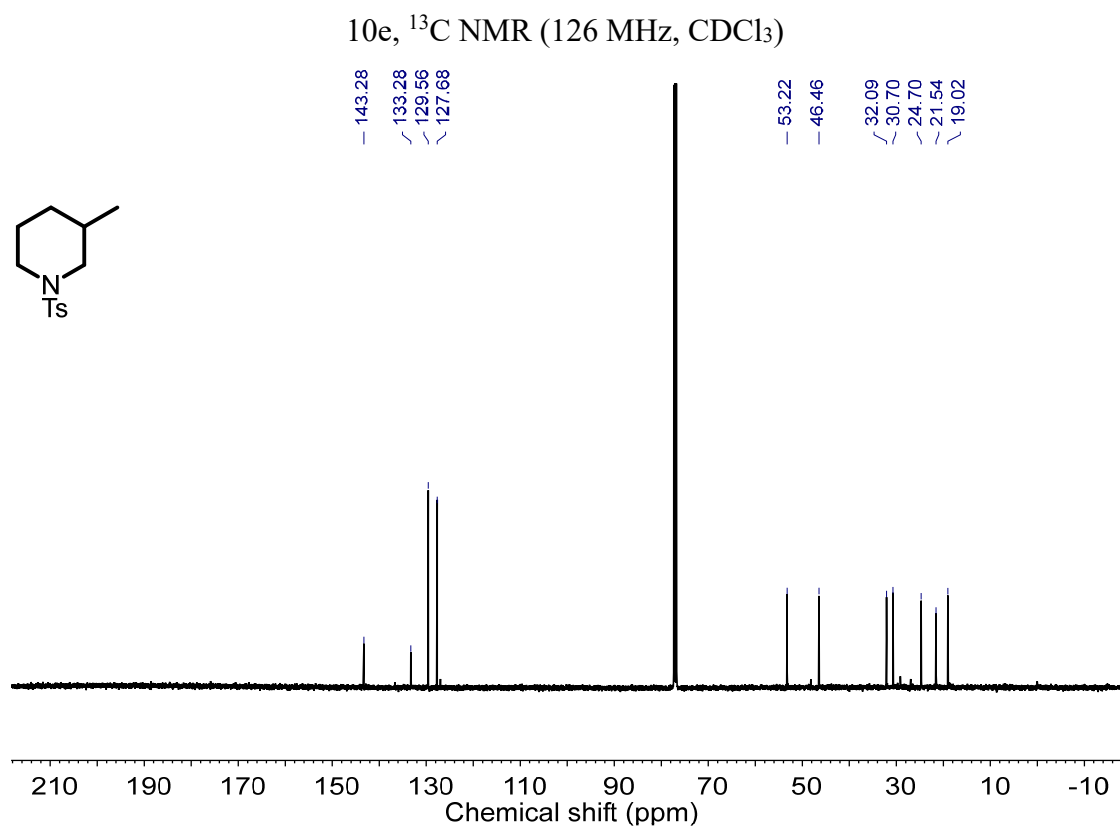

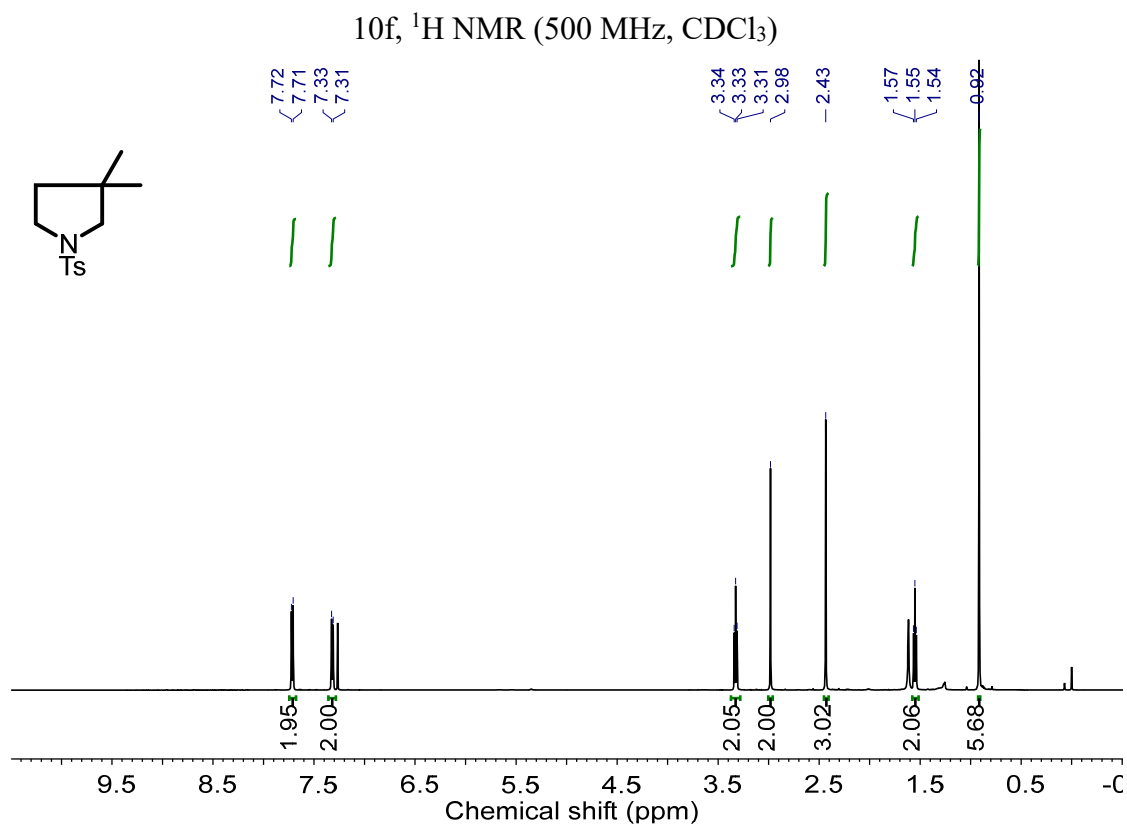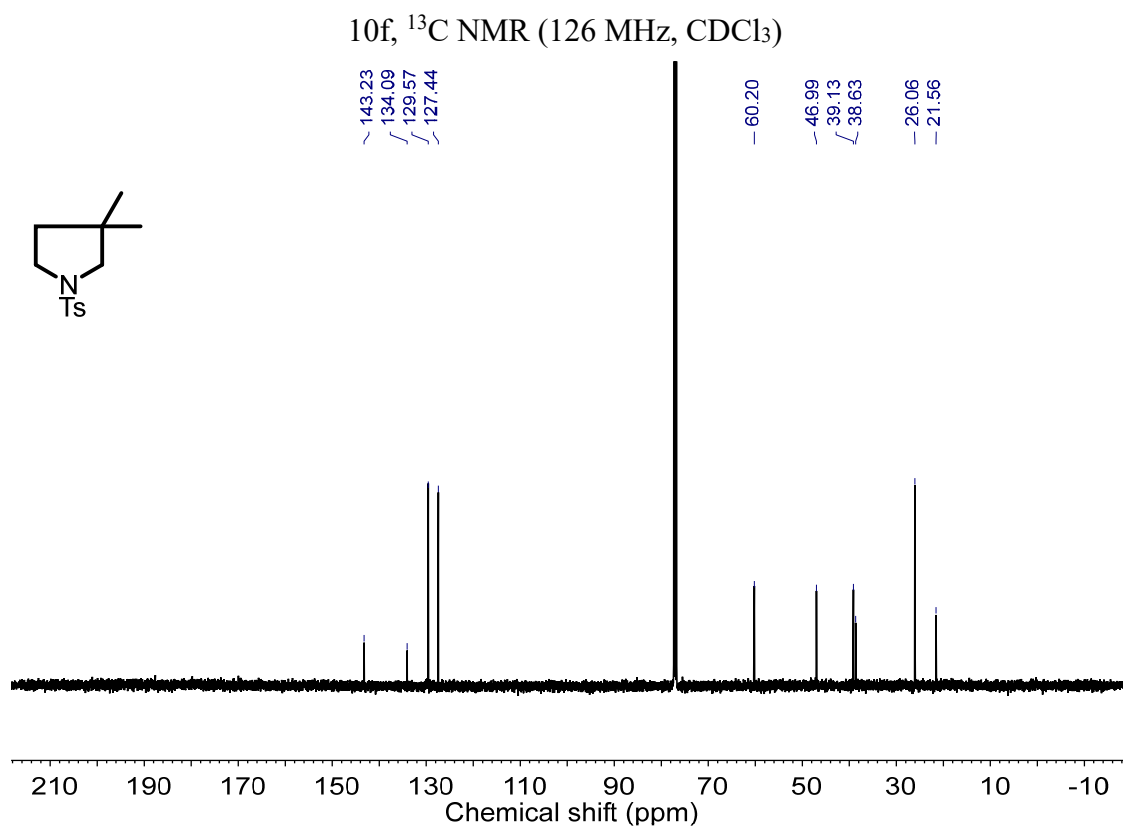

Supplement: SC-OLF-D4SC06058J-s001.pdf [file SC-OLF-D4SC06058J-s001.pdf]
